# Supplementary material for: A new parameterization of photolysis rates for oxygenated volatile organic compounds (OVOCs)
Source: Copernicus journal article supplement (doi:10.5194/acp-25-7037-2025), 2025-07-10
Supplement: Supplementary file 1 [file acp-25-7037-2025-supplement.zip]

## Sheet: Info.
This document contains the following sheets:
1	Species Dataset – The OVOCs photolysis dataset forms the reference group, along with their references and species structural information.
2	Averaged Dataset – The averaged Jrel, Joverhead, and corresponding photolysis lifetime for 109 measured OVOCs in the reference group.
3	Species Used for RV – The subset of species used in the calculation of reference values.
4	Species Used for Coeff – The subset of species used in adjustment coefficient calculations.
5	Reference Value Table – A reference value dataset covering 21 categories of compounds containing 1 to 20 carbon atoms.
6	Prediction-MCM2327 – Predicted photolysis rates for 2327 photodegradable OVOCs included in the MCM v3.3.1 mechanism, along with species information, and photolysis rates assigned in MCM. Photolysis frequencies under overhead sun are also provided for reference.
7	Newly Added 714 Species – A dataset of 714 newly supplemented photodegradable OVOCs in the MCM v3.3.1 mechanism, including species information, predicted Jrel, and estimated photolysis products in the extended mechanism. Photolysis frequencies under overhead sun are also provided for reference.
Explanation of Abbreviations：
CAS	Chemical Abstracts Service number – a unique numerical identifier for chemicals.
InChI	International Chemical Identifier – a textual identifier for chemical substances.
Canonical SMILES	A unique SMILES (Simplified Molecular Input Line Entry System) notation for a molecule.
MCM SMILES	SMILES format used by the Master Chemical Mechanism (MCM) model.
MCMName	The compound name as used in the MCM Mechanism.
MolWeight	Molecular Weight – the mass of one molecule of the compound, typically in g/mol.
MolecularFormula	The chemical formula representing the types and numbers of atoms in the molecule.
nC	Number of Carbon atoms in the molecule.
nO	Number of Oxygen atoms in the molecule.
nN	Number of Nitrogen atoms in the molecule.
nH	Number of Hydrogen atoms in the molecule.
nS	Number of Sulfur atoms in the molecule.
nCl	Number of Chlorine atoms in the molecule.
nBr	Number of Bromine atoms in the molecule.
OSc	The average carbon oxidation state , calculated based on the method by Kroll et al. (2011).
Degree of Unsaturation	A count of rings and π bonds in the molecule, indicating structural unsaturation. It reflects how many pairs of hydrogen atoms are missing compared to a fully saturated compound. Also called Double Bond Equivalent (DBE).

## Sheet: 1 Species Dataset
No.	Species Type	Species Name	Structure	CAS	nC	nO	nN	Canonical SMILES	MCMSMILES	MCMName	MolWeight	Joverhead (s-1)	Jrel (when jNO2sza=0 = 0.01094 s-1)	Source	SZA or additional notes
1	Acyclic Aldehydes	formaldehyde		50-00-0	1	1	0	C=O	C=O	HCHO	30.03	9.02e-05	0.00824497	Mellouki et al., 2015, CR	0
2	Acyclic Aldehydes	formaldehyde; methanal;		50-00-0	1	1	0	C=O	C=O	HCHO	30.03	9.95611e-05	0.00910065	IUPAC	0
3	Acyclic Aldehydes	formaldehyde		50-00-0	1	1	0	C=O	C=O	HCHO	30.03	9.02e-05	0.00827523	Calvert et al., 2011	0
4	Acyclic Aldehydes	acetaldehyde		75-07-0	2	1	0	CC=O	CC=O	CH3CHO	44.05	7.89912e-06	0.00072204	IUPAC	0
5	Acyclic Aldehydes	acetaldehyde		75-07-0	2	1	0	CC=O	CC=O	CH3CHO	44.05	7.31e-06	0.00066819	Mellouki et al., 2015, CR	0
6	Acyclic Aldehydes	acetaldehyde		75-07-0	2	1	0	CC=O	CC=O	CH3CHO	44.05	2.9e-06	0.000275142	Moortgat et al., 2002, Final Report on EU Project	20 in chamber, converted to joverhead before included in the database
7	Acyclic Aldehydes	acetaldehyde		75-07-0	2	1	0	CC=O	CC=O	CH3CHO	44.05	7.31e-06	0.000670642	Calvert et al., 2011	0
8	Acyclic Aldehydes	propionaldehyde; propanal;		123-38-6	3	1	0	CCC=O	CCC=O	C2H5CHO	58.08	5.55416e-05	0.00507693	IUPAC	0
9	Acyclic Aldehydes	Propanal		123-38-6	3	1	0	CCC=O	CCC=O	C2H6CHO	58.08	1.18e-05	0.00107861	Mellouki et al., 2015, CR	0
10	Acyclic Aldehydes	Propanal		123-38-6	3	1	0	CCC=O	CCC=O	C2H8CHO	58.08	1.18e-05	0.00108257	Calvert et al., 2011	0
11	Acyclic Aldehydes	n-butyraldehyde; n-butanal;		123-72-8	4	1	0	CCCC=O	CCCC=O	C3H7CHO	72.11	2.19857e-05	0.00200966	IUPAC	0
12	Acyclic Aldehydes	Butanal C4H8O		123-72-8	4	1	0	CCCC=O	CCCC=O	C3H7CHO	72.11	1.98e-05	0.00180987	Mellouki et al., 2015, CR	0
13	Acyclic Aldehydes	Butanal C4H8O		123-72-8	4	1	0	CCCC=O	CCCC=O	C3H7CHO	72.11	1.98e-05	0.00181651	Calvert et al., 2011	0
14	Acyclic Aldehydes	Isobutanal		78-84-2	4	1	0	CC(C)C=O	O=CC(C)C	IPRCHO	72.11	7.42955e-05	0.00679118	IUPAC	0
15	Acyclic Aldehydes	Isobutanal		78-84-2	4	1	0	CC(C)C=O	O=CC(C)C	IPRCHO	72.11	5.91e-05	0.00540219	Mellouki et al., 2015, CR	0
16	Acyclic Aldehydes	Isobutanal		78-84-2	4	1	0	CC(C)C=O	O=CC(C)C	IPRCHO	72.11	5.58e-05	0.00511927	Calvert et al., 2011	0
17	Acyclic Aldehydes	Isobutanal		78-84-2	4	1	0	CC(C)C=O	O=CC(C)C	IPRCHO	72.11	6.24e-05	0.00572477	Calvert et al., 2011	0
18	Acyclic Aldehydes	Pentanal		110-62-3	5	1	0	CCCCC=O	CCCCC=O	C4H9CHO	86.1323	1.8e-05	0.00164534	Mellouki et al., 2015, CR	0
19	Acyclic Aldehydes	Pentanal		110-62-3	5	1	0	CCCCC=O	CCCCC=O	C4H9CHO	86.1323	1.8e-05	0.00165138	Calvert et al., 2011	0
20	Acyclic Aldehydes	Isopentaldehyde; 3-Methylbutanal;		590-86-3	5	1	0	CC(C)CC=O	O=CCC(C)C	C3ME3CHO	86.1323	1.81e-05	0.00165448	Mellouki et al., 2015, CR	0
21	Acyclic Aldehydes	Isopentaldehyde; 3-Methylbutanal;		590-86-3	5	1	0	CC(C)CC=O	O=CCC(C)C	C3ME3CHO	86.1323	1.81e-05	0.00166055	Calvert et al., 2011	0
22	Acyclic Aldehydes	2,2-Dimethylpropanal; Pivaldehyde;		630-19-3	5	1	0	CC(C)(C)C=O	O=CC(C)(C)C	TBUTCHO	86.1323	2.4e-05	0.00219378	Mellouki et al., 2015, CR	0
23	Acyclic Aldehydes	2,2-Dimethylpropanal; Pivaldehyde;		630-19-3	5	1	0	CC(C)(C)C=O	O=CC(C)(C)C	TBUTCHO	86.1323	1.44e-05	0.0013211	Calvert et al., 2011	0
24	Acyclic Aldehydes	2,2-Dimethylpropanal; Pivaldehyde;		630-19-3	5	1	0	CC(C)(C)C=O	O=CC(C)(C)C	TBUTCHO	86.1323	3.36e-05	0.00308257	Calvert et al., 2011	0
25	Acyclic Aldehydes	Hexanal		66-25-1	6	1	0	CCCCCC=O	CCCCCC=O	C5H11CHO	100.159	2.41e-05	0.00220293	Mellouki et al., 2015, CR	0
26	Acyclic Aldehydes	Hexanal		66-25-1	6	1	0	CCCCCC=O	CCCCCC=O	C5H11CHO	100.159	2.41e-05	0.00221101	Calvert et al., 2011	0
27	Acyclic Aldehydes	n-heptanal		111-71-7	7	1	0	CCCCCCC=O	CCCCCCC=O	C6H13CHO	114.186	1.13e-05	0.00103291	Mellouki et al., 2015, CR	0
28	Acyclic Aldehydes	n-heptanal		111-71-7	7	1	0	CCCCCCC=O	CCCCCCC=O	C6H13CHO	114.186	9.49e-06	0.000870642	Calvert et al., 2011	0
29	Acyclic Aldehydes	n-heptanal		111-71-7	7	1	0	CCCCCCC=O	CCCCCCC=O	C6H13CHO	114.186	1.31e-05	0.00120183	Calvert et al., 2011	0
30	Cyclic Aldehydes	oxirane-2-carbaldehyde; glycidaldehyde;		765-34-4	3	2	0	C1C(O1)C=O	not included	not included	72.06	7.58728e-05	0.00693536	Ma et al., 1998, EST	0
31	Cyclic Aldehydes	oxirane-2-carbaldehyde; glycidaldehyde;		765-34-4	3	2	0	C1C(O1)C=O	not included	not included	72.06	6e-05	0.00705882	Calvert et al., 2011	j(NO2) ≈ 8.5×10-3 s-1 for noon at 40◦N
32	Cyclic Aldehydes	oxirane-2-carbaldehyde; glycidaldehyde;		765-34-4	3	2	0	C1C(O1)C=O	not included	not included	72.06	6.85e-05	0.0062844	Calvert et al., 2011	0
33	Unsaturated Aldehydes	Acrolein 2-Propenal		107-02-8	3	1	0	C=CC=O	C=CC=O	ACR	56.06	1.42e-06	0.000129799	Mellouki et al., 2015, CR	0
34	Unsaturated Aldehydes	Acrolein 2-Propenal		107-02-8	3	1	0	C=CC=O	C=CC=O	ACR	56.06	1.42e-06	0.000130275	Calvert et al., 2011	0
35	Unsaturated Aldehydes	2-methylpropenal; methacrolein; MACR;		78-85-3	4	1	0	CC(=C)C=O	CC(=C)C=O	MACR	70.09	3.0046e-05	0.00274644	IUPAC	0, QY=0.05(upper limit), not included in the average calculation for reference value
36	Unsaturated Aldehydes	2-methylpropenal; methacrolein; MACR;		78-85-3	4	1	0	CC(=C)C=O	CC(=C)C=O	MACR	70.09	6.00921e-06	0.000549288	IUPAC	0, QY=0.01, recommended
37	Unsaturated Aldehydes	2-methylpropenal; methacrolein; MACR;		78-85-3	4	1	0	CC(=C)C=O	CC(=C)C=O	MACR	70.09	1.75e-06	0.000166826	Moortgat et al., 2002, Final Report on EU Project	21.3 in chamber when jNO2 = 1.05E-02 converted to joverhead before included in the database)
38	Unsaturated Aldehydes	2-methylpropenal; methacrolein; MACR;		78-85-3	4	1	0	CC(=C)C=O	CC(=C)C=O	MACR	70.09	6.61e-06	0.000606422	Calvert et al., 2011	0
39	Unsaturated Aldehydes	2-Butenal Crotonaldehyde		123-73-9	4	1	0	CC=CC=O	CC=CC=O	C4ALDB	70.09	6.61e-06	0.000604205	Mellouki et al., 2015, CR	0
40	Unsaturated Aldehydes	cis/ trans-2-Hexenal		16635-54-4 / 6728-26-3	6	1	0	CCCC=CC=O	not included	not included	98.143	0.000102	0.00932358	Calvert et al., 2011	unknown, photoisomerization rate
41	Unsaturated Dialdehydes	2,4-Hexadienal		142-83-6	6	1	0	CC=CC=CC=O	not included	not included	96.13	0.000145	0.0258929	Calvert et al., 2011	unknown,photoisomerization rate
42	Acycli Ketones	Acetone		67-64-1	3	1	0	CC(=O)C	CC(=O)C	CH3COCH3	58.0791	9.95322e-07	9.09801e-05	IUPAC	0
43	Acycli Ketones	Acetone		67-64-1	3	1	0	CC(=O)C	CC(=O)C	CH3COCH3	58.0791	5.2e-07	4.77064e-05	Calvert et al., 2011	0
44	Acycli Ketones	Acetone		67-64-1	3	1	0	CC(=O)C	CC(=O)C	CH3COCH3	58.0791	8.62e-07	7.90826e-05	Calvert et al., 2011	0
45	Acycli Ketones	methyl ethyl ketone; MEK;2-butanone;		78-93-3	4	1	0	CCC(=O)C	CCC(=O)C	MEK	72.11	5.20058e-06	0.000475373	IUPAC	0
46	Acycli Ketones	methyl ethyl ketone; MEK;2-butanone;		78-93-3	4	1	0	CCC(=O)C	CCC(=O)C	MEK	72.11	4.68e-06	0.000429358	Calvert et al., 2011	0
47	Acycli Ketones	2-Pentanone		107-87-9	5	1	0	CCCC(=O)C	CCCC(=O)C	MPRK	86.13	1.57e-06	0.000144037	Calvert et al., 2011	0
48	Acycli Ketones	2-Pentanone		107-87-9	5	1	0	CCCC(=O)C	CCCC(=O)C	MPRK	86.13	2.67e-06	0.000244954	Calvert et al., 2011	0
49	Acycli Ketones	2-Hexanone		591-78-6	6	1	0	CCCCC(=O)C	CCCCC(=O)C	HEX2ONE	100.16	1.39e-06	0.000127523	Calvert et al., 2011	0
50	Acycli Ketones	2-Hexanone		591-78-6	6	1	0	CCCCC(=O)C	CCCCC(=O)C	HEX2ONE	100.16	8.04e-06	0.000737615	Calvert et al., 2011	0
51	Acycli Ketones	4-methyl-2-pentanone		108-10-1	6	1	0	CC(C)CC(=O)C	CC(C)CC(=O)C	MIBK	100.16	2.70322e-05	0.00247095	Mu et al., 2000, JPPAC	0
52	Acycli Ketones	2,4-dimethyl-3-pentanone		565-80-0	7	1	0	CC(C)C(=O)C(C)C	not included	not included	114.19	4.12645e-05	0.00377189	Mu et al., 2000, JPPAC	0
53	Acycli Ketones	5-methyl-2-hexanone		110-12-3	7	1	0	CC(C)CCC(=O)C	CC(C)CCC(=O)C	M2CO5C6	114.19	2.1282e-05	0.00194534	Mu et al., 2000, JPPAC	0
54	Cyclic Ketones	Cyclopropanone		5009-27-8	3	1	0	C1CC1=O	not included	not included	56.06	0.00037	0.033945	Calvert et al., 2011	0
55	Cyclic Ketones	Cyclobutanone		1191-95-3	4	1	0	C1CC(=O)C1	not included	not included	70.09	2.63e-05	0.00241284	Calvert et al., 2011	0
56	Unsaturated Ketones	Ketene		463-51-4	2	1	0	C=C=O	not included	not included	42.04	0.000288	0.026422	Calvert et al., 2011	0
57	Unsaturated Ketones	methyl vinyl ketone; MVK		78-94-4	4	1	0	CC(=O)C=C	CC(=O)C=C	MVK	70.09	2.57017e-06	0.000234933	IUPAC	0
58	Unsaturated Ketones	methyl vinyl ketone; MVK		78-94-4	4	1	0	CC(=O)C=C	CC(=O)C=C	MVK	70.09	4.73e-06	0.000433945	Calvert et al., 2011	0
59	Hydroxy Aldehydes and Ketones	Glycolaldehyde		141-46-8	2	2	0	C(C=O)O	OCC=O	HOCH2CHO	60.052	9.09269e-06	0.000831142	IUPAC	0
60	Hydroxy Aldehydes and Ketones	Glycolaldehyde		141-46-8	2	2	0	C(C=O)O	OCC=O	HOCH2CHO	60.052	1.48e-05	0.00135283	Mellouki et al., 2015, CR	0
61	Hydroxy Aldehydes and Ketones	Glycolaldehyde		141-46-8	2	2	0	C(C=O)O	OCC=O	HOCH2CHO	60.052	1.48e-05	0.0013578	Calvert et al., 2011	0
62	Hydroxy Aldehydes and Ketones	Hydroxyacetone		116-09-6	3	2	0	CC(=O)CO	CC(=O)CO	ACETOL	74.08	2.27749e-06	0.00020818	IUPAC	0
63	Hydroxy Aldehydes and Ketones	Hydroxyacetone		116-09-6	3	2	0	CC(=O)CO	CC(=O)CO	ACETOL	74.08	1.05e-06	9.63303e-05	Calvert et al., 2011	0
64	Hydroxy Aldehydes and Ketones	Hydroxyacetone		116-09-6	3	2	0	CC(=O)CO	CC(=O)CO	ACETOL	74.08	2.09e-06	0.000191743	Calvert et al., 2011	0
65	Hydroxy Aldehydes and Ketones	4-Hydroxy-2-butanone		590-90-9	4	2	0	CC(=O)CCO	CC(=O)CCO	MEKAOH	88.11	1.47222e-06	0.000134572	Bouzidi et al., 2015, EST	0
66	Hydroxy Aldehydes and Ketones	3-Hydroxy-3-methyl-2-butanone		115-22-0	5	2	0	CC(=O)C(C)(C)O	CC(=O)C(C)(C)O	MIPKAOH	102.13		0.00082	Tomas et al., 2021, AE	sunlight EUPHORE jNO2≈0.0083s-1
67	Hydroxy Aldehydes and Ketones	Diacetone alcohol; 4-hydroxy-4-methyl-2-pentanone;		123-42-2	6	2	0	CC(=O)CC(C)(C)O	CC(=O)CC(C)(C)O	MIBKAOH	116.16		0.00062	Tomas et al., 2021, AE	sunlight EUPHORE jNO2≈0.0083s-1
68	Hydroxy Aldehydes and Ketones	4-Hydroxyhexan-3-one		4984-85-4	6	2	0	CCC(C(=O)CC)O	CCC(=O)C(O)CC	C6CO3HO4	116.16		0.00051	Tomas et al., 2021, AE	sunlight EUPHORE jNO2≈0.0083s-1
69	Dialdehydes	glyoxal		107-22-2	2	2	0	C(=O)C=O	O=CC=O	GLYOX	58.036	0.000191029	0.0174615	IUPAC	0
70	Dialdehydes	glyoxal		107-22-2	2	2	0	C(=O)C=O	O=CC=O	GLYOX	58.036	0.00014	0.0127971	Mellouki et al., 2015, CR	0
71	Dialdehydes	glyoxal		107-22-2	2	2	0	C(=O)C=O	O=CC=O	GLYOX	58.036	0.00015	0.016816	Calvert et al., 2011	a cloudless sky, an altitude of 500 m, and an overhead ozone column of 350 DU
72	Dialdehydes	glyoxal		107-22-2	2	2	0	C(=O)C=O	O=CC=O	GLYOX	58.036	0.000124	0.0113761	Calvert et al., 2011	0
73	Dialdehydes	glyoxal		107-22-2	2	2	0	C(=O)C=O	O=CC=O	GLYOX	58.036	0.000155	0.0142202	Calvert et al., 2011	0
74	Unsaturated Dialdehydes	Maleic dialdehyde; 2-Butenedial;		2363-83-9 / 3675-14-7	4	2	0	C(=CC=O)C=O	O=CC=CC=O	MALDIAL	84.07	0.000121771	0.0136513	IUPAC	0
75	Unsaturated Dialdehydes	Maleic dialdehyde; 2-Butenedial;		2363-83-9 / 3675-14-7	4	2	0	C(=CC=O)C=O	O=CC=CC=O	MALDIAL	84.07	0.0012	0.109689	Mellouki et al., 2015, CR	0
76	Unsaturated Dialdehydes	Maleic dialdehyde; 2-Butenedial;		2363-83-9 / 3675-14-7	4	2	0	C(=CC=O)C=O	O=CC=CC=O	MALDIAL	84.07	0.0018	0.178218	Sørensen and Barnes et al., 1998	unknown
77	Unsaturated Dialdehydes	Maleic dialdehyde; (Z)-2-Butenedial;		2363-83-9	4	2	0	C(=CC=O)C=O	O=CC=CC=O	MALDIAL	84.07		0.18	Sørensen and Barnes et al., 1998	unknown
78	Unsaturated Dialdehydes	Maleic dialdehyde; (E)-2-Butenedial;		3675-14-7	4	2	0	C(=CC=O)C=O	O=CC=CC=O	MALDIAL	84.07		0.14	Newland et al., 2019, PCCP	solar noon JNO2=8E-3 s-1
79	Unsaturated Dialdehydes	Maleic dialdehyde; 2-Butenedial;		2363-83-9 / 3675-14-7	4	2	0	C(=CC=O)C=O	O=CC=CC=O	MALDIAL	84.07	0.0012	0.110092	Calvert et al., 2011	0
80	Unsaturated Dialdehydes	4-oxopent-2-enal; Acetylacrolein		5729-47-5	5	2	0	CC(=O)C=CC=O	O=CC=CC(=O)C	C5DICARB	98.0999	0.000622641	0.0569141	IUPAC	0
81	Unsaturated Dialdehydes	4-oxopent-2-enal; Acetylacrolein		5729-47-5	5	2	0	CC(=O)C=CC=O	O=CC=CC(=O)C	C5DICARB	98.0999	0.001	0.0914077	Calvert et al., 2011	0 upper limit overhead ozone column of 350 DU
82	Unsaturated Dialdehydes	(Z)-4-oxo-2-Pentenal; Acetylacrolein		5729-47-5	5	2	0	CC(=O)C=CC=O	O=CC=CC(=O)C	C5DICARB	98.0999	0.000765	0.0701835	Calvert et al., 2011	0
83	Unsaturated Dialdehydes	(E)-4-oxo-2-Pentenal; Acetylacrolein		5729-47-5	5	2	0	CC(=O)C=CC=O	O=CC=CC(=O)C	C5DICARB	98.0999	0.000995	0.0912844	Calvert et al., 2011	0
84	Unsaturated Dialdehydes	(Z)-4-oxo-2-Pentenal; Acetylacrolein		5729-47-5	5	2	0	CC(=O)C=CC=O	O=CC=CC(=O)C	C5DICARB	98.0999		0.21	Newland et al., 2019, PCCP	solar noon JNO2=8E-3 s-1
85	Unsaturated Dialdehydes	(E)-4-oxo-2-Pentenal; Acetylacrolein		5729-47-5	5	2	0	CC(=O)C=CC=O	O=CC=CC(=O)C	C5DICARB	98.0999		0.18	Newland et al., 2019, PCCP	solar noon JNO2=8E-3 s-1
86	Unsaturated Dialdehydes	E,E-2,4-Hexadienedial		3249-28-3	6	2	0	C(=CC=O)C=CC=O	not included	not included	110.11	0.00021	0.0191956	Xiang and Zhu, 2007, CPL	0
87	Unsaturated Dialdehydes	E,E-2,4-Hexadienedial		3249-28-3	6	2	0	C(=CC=O)C=CC=O	not included	not included	110.11	0.00026	0.023766	Klotz et al., 1999, IJCK	unknown
88	Diketones	2,3-Butanedione; biacetyl;		431-03-8	4	2	0	CC(=O)C(=O)C	CC(=O)C(=O)C	BIACET	86.09	2.30709e-05	0.00210886	IUPAC	0
89	Diketones	2,3-Butanedione; biacetyl;		431-03-8	4	2	0	CC(=O)C(=O)C	CC(=O)C(=O)C	BIACET	86.09	0.000354	0.0324771	Klotz et al., 2000, IJCK	0 (simulation made to match EUPHORE estimates)
90	Diketones	2,3-Butanedione; biacetyl;		431-03-8	4	2	0	CC(=O)C(=O)C	CC(=O)C(=O)C	BIACET	86.09	0.000196	0.0179817	Calvert et al., 2011	0 assumed cutoff of photodissociation occurs for λ >492 nm;
91	Diketones	2,3-Butanedione; biacetyl;		431-03-8	4	2	0	CC(=O)C(=O)C	CC(=O)C(=O)C	BIACET	86.09	7.01e-05	0.00643119	Calvert et al., 2011	0 assumed cutoff of photodissociation occurs for λ >410 nm.
92	Diketones	2,3-Butanedione; biacetyl;		431-03-8	4	2	0	CC(=O)C(=O)C	CC(=O)C(=O)C	BIACET	86.09	0.000278	0.0254113	Plum et al., 1983, EST	unknown
93	Diketones	2,3-Butanedione; biacetyl;		431-03-8	4	2	0	CC(=O)C(=O)C	CC(=O)C(=O)C	BIACET	86.09	0.00023	0.0210238	Darnall et al., 1979, JPC	unknown
94	Diketones	2,3-Butanedione; biacetyl;		431-03-8	4	2	0	CC(=O)C(=O)C	CC(=O)C(=O)C	BIACET	86.09	0.00021	0.0191956	Grosjean et al., 1985, EST	unknown
95	Diketones	2,3-Butanedione; biacetyl;		431-03-8	4	2	0	CC(=O)C(=O)C	CC(=O)C(=O)C	BIACET	86.09	5.9e-05	0.00539305	Gery et al., 1987, EST	the results at SZA = 0 after conversion to jrel
96	Diketones	2,3-pentanedione; PTD;		600-14-6	5	2	0	CCC(=O)C(=O)C	CCC(=O)C(=O)C	CO23C5	100.116		0.034	Tomas et al., 2021, AE	sunlight EUPHORE jNO2≈0.0083s-1
97	Unsaturated Diketones	trans-3-Hexene-2,5-dione		820-69-9	6	2	0	CC(=O)C=CC(=O)C	CC(=O)C=CC(=O)C	C4DBDIKET	112.13	4.73e-05	0.00433945	Calvert et al., 2011	0
98	Unsaturated Diketones	cis-3-Hexene-2,5-dione		17559-81-8	6	2	0	CC(=O)C=CC(=O)C	CC(=O)C=CC(=O)C	C5DBDIKET	112.13	4.43e-05	0.00406422	Calvert et al., 2011	0
99	Ketoaldehydes	Methylglyoxal		78-98-8	3	2	0	CC(=O)C=O	O=CC(=O)C	MGLYOX	72.0627	0.000165118	0.0150931	IUPAC	0
100	Ketoaldehydes	Methylglyoxal		78-98-8	3	2	0	CC(=O)C=O	O=CC(=O)C	MGLYOX	72.0627	0.000145	0.0132541	Mellouki et al., 2015, CR	0
101	Ketoaldehydes	Methylglyoxal		78-98-8	3	2	0	CC(=O)C=O	O=CC(=O)C	MGLYOX	72.0627	0.000145	0.0133028	Calvert et al., 2011	0
102	Ketoaldehydes	Pinonaldehyde		2704-78-1	10	2	0	CC(=O)C1CC(C1(C)C)CC=O	O=CCC1CC(C(=O)C)C1(C)C	PINAL	168.23	4.71596e-05	0.00431075	IUPAC	0
103	Ketoaldehydes	Pinonaldehyde		2704-78-1	10	2	0	CC(=O)C1CC(C1(C)C)CC=O	O=CCC1CC(C(=O)C)C1(C)C	PINAL	168.23	1.41e-05	0.00128885	Mellouki et al., 2015, CR	0
104	Ketoaldehydes	Pinonaldehyde		2704-78-1	10	2	0	CC(=O)C1CC(C1(C)C)CC=O	O=CCC1CC(C(=O)C)C1(C)C	PINAL	168.23	1.14e-05	0.00108675	Moortgat et al., 2002, Final Report on EU Project	21.2 (TUV: jNO2 = 1.049E-02, converted to joverhead before included in the database)
105	Ketoaldehydes	Pinonaldehyde		2704-78-1	10	2	0	CC(=O)C1CC(C1(C)C)CC=O	O=CCC1CC(C(=O)C)C1(C)C	PINAL	168.23	1.1e-05	0.00106486	Moortgat et al., 2002, Final Report on EU Project	24.5 (TUV: jNO2=1.033E-02, converted to joverhead before included in the database))
106	Ketoaldehydes	Pinonaldehyde		2704-78-1	10	2	0	CC(=O)C1CC(C1(C)C)CC=O	O=CCC1CC(C(=O)C)C1(C)C	PINAL	168.23	1.41e-05	0.00129358	Calvert et al., 2011	0
107	Aromatic Aldehydes	Benzaldehyde		100-52-7	7	1	0	C1=CC=C(C=C1)C=O	O=Cc1ccccc1	BENZAL	106.12	1.71081e-06	0.000156381	IUPAC	0
108	Aromatic Aldehydes	Benzaldehyde		100-52-7	7	1	0	C1=CC=C(C=C1)C=O	O=Cc1ccccc1	BENZAL	106.12	0.000162613	0.0148641	Chen et al., 2011, JPCA	0
109	Aromatic Aldehydes	Benzaldehyde		100-52-7	7	1	0	C1=CC=C(C=C1)C=O	O=Cc1ccccc1	BENZAL	106.12	0.000312	0.0285192	Mellouki et al., 2015, CR	0
110	Aromatic Aldehydes	Benzaldehyde		100-52-7	7	1	0	C1=CC=C(C=C1)C=O	O=Cc1ccccc1	BENZAL	106.12	0.000312	0.0286239	Calvert et al., 2011	0 total
111	Aromatic Aldehydes	o-tolualdehyde		529-20-4	8	1	0	CC1=CC=CC=C1C=O	O=Cc1ccccc1C	OXYLAL	120.15	0.0002	0.0182815	Mellouki et al., 2015, CR	0
112	Aromatic Aldehydes	Phthaldialdehyde		643-79-8	8	2	0	C1=CC=C(C(=C1)C=O)C=O	not included	not included	134.13	0.000823	0.0755046	Calvert et al., 2011	0
113	Aromatic Aldehydes	2-Acetylbenzaldehyde		24257-93-0	9	2	0	CC(=O)C1=CC=CC=C1C=O	not included	not included	148.16	0.000887	0.0813761	Calvert et al., 2011	0
114	Aromatic Aldehydes	2-Nitrobenzaldehyde / o-Nitrobenzaldehyde		552-89-6	7	3	1	C1=CC=C(C(=C1)C=O)[N+](=O)[O-]	not included	not included	151.12	0.00734	0.673394	Calvert et al., 2011	0
115	Aromatic Aldehydes	2-Nitrobenzaldehyde / o-Nitrobenzaldehyde		552-89-6	7	3	1	C1=CC=C(C(=C1)C=O)[N+](=O)[O-]	not included	not included	151.12	0.00310464	0.283788	Bouya et al., 2017, AE	0
116	Other Aromatics	Benzene oxide		1488-25-1	6	1	0	C1=CC2C(O2)C=C1	not included	not included	94.11	0.000433	0.0397248	Calvert et al., 2011	0
117	Other Aromatics	Oxepin		291-70-3	6	1	0	C1=CC=COC=C1	O1C=CC=CC=C1	OXEPIN	94.11	0.000433	0.0397248	Calvert et al., 2011	0
118	Other Aromatics	Toluene oxide		/	7	1	0	CC1=CC=CC2C1O2	not included	not included	108.14	0.000391	0.0358716	Calvert et al., 2011	0
119	Other Aromatics	Methyloxepin		/	7	1	0	CC1=CC=CC=CO1	not included	not included	108.14	0.000391	0.0358716	Calvert et al., 2011	0
120	Other Aromatics	Nitrobenzene		98-95-3	6	2	0	C1=CC=C(C=C1)[N+](=O)[O-]	not included	not included	123.11	2.06e-05	0.00188991	Calvert et al., 2011	0
121	Other Aromatics	2-nitrophenol		88-75-5	6	3	1	C1=CC=C(C(=C1)[N+](=O)[O-])O	O=N(=O)c1ccccc1O	HOC6H4NO2	139.11	0.0001611	0.0147258	Chen et al., 2011, JPCA	0
122	Other Aromatics	3-methyl-2-nitrophenol; 3M2NP;		4920-77-8	7	3	1	CC1=C(C(=CC=C1)O)[N+](=O)[O-]	not included	not included	153.14	0.000107249	0.00980334	Chen et al., 2011, JPCA	0
123	Other Aromatics	4-methyl-2-nitrophenol; 4M2NP;		119-33-5	7	3	1	CC1=CC(=C(C=C1)O)[N+](=O)[O-]	Cc1ccc(O)c(c1)N(=O)=O	TOL4OHNO2	153.14	0.000132565	0.0121174	Chen et al., 2011, JPCA	0
124	Other Aromatics	2-Methyl-1-nitronaphthalene		881-03-8	11	2	0	CC1=C(C2=CC=CC=C2C=C1)[N+](=O)[O-]	not included	not included	187.19	0.000166	0.0152294	Calvert et al., 2011	0
125	Alkyl Nitrates	Methyl nitrate		598-58-3	1	3	1	CO[N+](=O)[O-]	CON(=O)=O	CH3NO3	77.0394	1.28477e-06	0.000117438	IUPAC	0
126	Alkyl Nitrates	Methyl nitrate		598-58-3	1	3	1	CO[N+](=O)[O-]	CON(=O)=O	CH3NO3	77.0394	1.16e-06	0.000106422	Calvert et al., 2011	0
127	Alkyl Nitrates	Ethyl nitrate		625-58-1	2	3	1	CCO[N+](=O)[O-]	CCON(=O)=O	C2H5NO3	91.066	2.01554e-06	0.000184235	IUPAC	0
128	Alkyl Nitrates	Ethyl nitrate		625-58-1	2	3	1	CCO[N+](=O)[O-]	CCON(=O)=O	C2H5NO3	91.066	1.37e-06	0.000125688	Calvert et al., 2011	0
129	Alkyl Nitrates	n-propyl nitrate		627-13-4	3	3	1	CCCO[N+](=O)[O-]	CCCON(=O)=O	NC3H7NO3	105.093	2.36346e-06	0.000216038	IUPAC	0
130	Alkyl Nitrates	n-propyl nitrate		627-13-4	3	3	1	CCCO[N+](=O)[O-]	CCCON(=O)=O	NC3H7NO3	105.093	1.79e-06	0.00016422	Calvert et al., 2011	0
131	Alkyl Nitrates	Isopropyl nitrate		1712-64-7	3	3	1	CC(C)O[N+](=O)[O-]	CC(C)ON(=O)=O	IC3H7NO3	105.093	3.33113e-06	0.00030449	IUPAC	0
132	Alkyl Nitrates	Isopropyl nitrate		1712-64-7	3	3	1	CC(C)O[N+](=O)[O-]	CC(C)ON(=O)=O	IC3H7NO3	105.093	3e-06	0.000275229	Calvert et al., 2011	0
133	Alkyl Nitrates	2-Hydroxyethyl nitrate; 2-Nitrooxy ethanol;		16051-48-2	2	4	1	C(CO[N+](=O)[O-])O	OCCON(=O)=O	ETHOHNO3	107.07	9.64e-08	8.84404e-06	Calvert et al., 2011	0
134	Alkyl Nitrates	tert-butyl nitrate		926-05-6	4	3	1	CC(C)(C)O[N+](=O)[O-]	O=N(=O)OC(C)(C)C	TC4H9NO3	119.119	8.34e-06	0.000765138	Calvert et al., 2011	0
135	Alkyl Nitrates	1-Butyl nitrate		928-45-0	4	3	1	CCCCO[N+](=O)[O-]	CCCCON(=O)=O	NC4H9NO3	119.12	2.30851e-06	0.000211016	IUPAC	0
136	Alkyl Nitrates	1-Butyl nitrate		928-45-0	4	3	1	CCCCO[N+](=O)[O-]	CCCCON(=O)=O	NC4H9NO3	119.12	1.59e-06	0.000145872	Calvert et al., 2011	0
137	Alkyl Nitrates	2-Butyl nitrate		924-52-7	4	3	1	CCC(C)O[N+](=O)[O-]	CCC(C)ON(=O)=O	SC4H9NO3	119.12	2.24536e-06	0.000205243	IUPAC	0
138	Alkyl Nitrates	Cyclopentyl nitrate		/	5	3	1	C1CCC(C1)O[N+](=O)[O-]	not included	not included	131.13	9.01e-07	8.26606e-05	Calvert et al., 2011	0
139	Alkyl Nitrates	2-Pentyl nitrate		21981-48-6	5	3	1	CCCC(C)O[N+](=O)[O-]	CCCC(C)ON(=O)=O	PEBNO3	133.15	2.58e-06	0.000236697	Calvert et al., 2011	0
140	Alkyl Nitrates	3-Pentyl nitrate		82944-59-0	5	3	1	CCC(CC)O[N+](=O)[O-]	CCC(CC)ON(=O)=O	PECNO3	133.15	2.52e-06	0.000231193	Calvert et al., 2011	0
141	Alkyl Nitrates	1,2-Propanediol dinitrate		/	3	6	2	CC(CO[N+](=O)[O-])O[N+](=O)[O-]	not included	not included	166.09	1.13e-05	0.0010367	Calvert et al., 2011	0
142	Alkyl Nitrates	1,2-Butanediol dinitrate; 1,2-BUTYL DINITRATE;		/	4	6	2	CCC(CO[N+](=O)[O-])O[N+](=O)[O-]	not included	not included	180.12	1.54e-05	0.00141284	Calvert et al., 2011	0
143	Alkyl Nitrates	2,3-Butanediol dinitrate		6423-45-6	4	6	2	CC(C(C)O[N+](=O)[O-])O[N+](=O)[O-]	not included	not included	180.12	1.19e-05	0.00109174	Calvert et al., 2011	0
144	Alkyl Nitrates	1-Methyl-cyclohexyl-1,2-dinitrate		/	7	6	2	CC1(O[N+]([O-])=O)CCCCC1O[N+]([O-])=O	not included	not included	220.18	5.32e-06	0.000488073	Calvert et al., 2011	0
145	Peroxy Nitrates	methyl peroxynitrate		42829-59-4	1	4	1	COO[N+](=O)[O-]	COON(=O)=O	CH3O2NO2	93.04	5.95706e-06	0.000544521	IUPAC	0
146	Peroxy Nitrates	Peroxyacetyl nitrate; PAN;		2278-22-0	2	5	1	CC(=O)OO[N+](=O)[O-]	CC(=O)OON(=O)=O	PAN	121.05	9.70312e-07	8.86939e-05	IUPAC	0
147	Peroxy Nitrates	Peroxyacetyl nitrate; PAN;		2278-22-0	2	5	1	CC(=O)OO[N+](=O)[O-]	CC(=O)OON(=O)=O	PAN	121.05	8.93e-07	8.19266e-05	Calvert et al., 2011	0
148	Peroxy Nitrates	Peroxypropionyl nitrate		5796-89-4	3	5	1	CCC(=O)OO[N+](=O)[O-]	CCC(=O)OON(=O)=O	PPN	135.076	1.56e-06	0.000143119	Calvert et al., 2011	0
149	Carbonyl Nitrates	2-oxoethyl nitrate; Nitroxy ethanal;		/	2	4	1	C(C=O)O[N+](=O)[O-]	O=CCON(=O)=O	NO3CH2CHO	105.049	0.00015	0.015009	Muller et al., 2014, ACP	30 (TUV: jNO2=9.994E-03, converted to joverhead before included in the database)
150	Carbonyl Nitrates	2-oxopropyl nitrate; α-Nitrooxy acetone;NOA;		6745-71-7	3	4	1	CC(=O)CO[N+](=O)[O-]	CC(=O)CON(=O)=O	NOA	119.076	3.5e-05	0.0035021	Muller et al., 2014, ACP	30 (TUV: jNO2=9.994E-03, converted to joverhead before included in the database)
151	Carbonyl Nitrates	2-oxopropyl nitrate; α-Nitrooxy acetone;NOA;		6745-71-7	3	4	1	CC(=O)CO[N+](=O)[O-]	CC(=O)CON(=O)=O	NOA	119.076	4.8e-05	0.005	Suarez-Bertoa et al, 2012, EST	CESAM chamber correct to jNO2≈0.0096s-1 July 1 at noon at 40° latitude North (overhead ozone column 200, albedo 0.1)
152	Carbonyl Nitrates	2-oxopropyl nitrate; α-Nitrooxy acetone;NOA;		6745-71-7	3	4	1	CC(=O)CO[N+](=O)[O-]	CC(=O)CON(=O)=O	NOA	119.076	3.81e-05	0.00349541	Calvert et al., 2011	0
153	Carbonyl Nitrates	1-Nitrooxy-2-butanone; 2-Oxobutyl nitrate;		138779-12-1	4	4	1	CCC(=O)CO[N+](=O)[O-]	CCC(=O)CON(=O)=O	CO3C4NO3	133.103	2.09e-05	0.00191743	Calvert et al., 2011	0
154	Carbonyl Nitrates	4-Nitrooxy-2-butanone		/	4	4	1	CC(=O)CCO[N+](=O)[O-]	CC(=O)CCON(=O)=O	MEKANO3	133.103		0.0059	Picquet-Varrault et al., 2020, ACP	jNO2 = 2.2 x 10-3 s-1
155	Carbonyl Nitrates	3-Nitrooxy-2-butanone		124855-10-3	4	4	1	CC(C(=O)C)O[N+](=O)[O-]	O=N(=O)OC(C)C(=O)C	BUTONENO3	133.103	5.7e-05	0.0059375	Suarez-Bertoa et al, 2012, EST	CESAM chamber correct to jNO2≈0.0096s-1 July 1 at noon at 40° latitude North (overhead ozone column 200, albedo 0.1)
156	Carbonyl Nitrates	3-Nitrooxy-2-butanone		124855-10-3	4	4	1	CC(C(=O)C)O[N+](=O)[O-]	O=N(=O)OC(C)C(=O)C	BUTONENO3	133.103	5.82e-05	0.00533945	Calvert et al., 2011	0
157	Carbonyl Nitrates	3-Methyl-4-nitroxy-2-butenal		/	5	4	1	CC(=CC=O)CO[N+](=O)[O-]	O=CC=C(C)CON(=O)=O	NC4CHO	145.113	0.00056	0.0560336	Muller et al., 2014, ACP	30 (TUV: jNO2=9.994E-03, converted to joverhead before included in the database)
158	Carbonyl Nitrates	5-Nitrooxy-2-pentanone; 4-oxopentyl nitrate;		/	5	4	1	CC(=O)CCCO[N+](=O)[O-]	not included	not included	147.129		0.0032	Picquet-Varrault et al., 2020, ACP	jNO2 = 2.2 x 10-3 s-1
159	Carbonyl Nitrates	3-methyl-3-nitrooxy-2-butanone		/	5	4	1	CC(=O)C(C)(C)O[N+](=O)[O-]	O=N(=O)OC(C)(C)C(=O)C	C4M2NO3ONE	147.129	7.4e-05	0.00770833	Suarez-Bertoa et al, 2012, EST	CESAM chamber correct to jNO2≈0.0096s-1 July 1 at noon at 40° latitude North (overhead ozone column 200, albedo 0.1)
160	Carbonyl Nitrates	MACRNO3;		/	4	5	1	OCC(C)(C=O)ON(=O)=O	OCC(C)(C=O)ON(=O)=O	MACRNO3	149.102	0.00035	0.035021	Muller et al., 2014, ACP	30 (TUV: jNO2=9.994E-03, converted to joverhead before included in the database)
161	Carbonyl Nitrates	MVKNO3;		/	4	5	1	OCC(ON(=O)=O)C(=O)C	OCC(ON(=O)=O)C(=O)C	MVKNO3	149.102	5.6e-05	0.00560336	Muller et al., 2014, ACP	30 (TUV: jNO2=9.994E-03, converted to joverhead before included in the database)
162	Carbonyl Nitrates	HMVKANO3;		/	4	5	1	O=N(=O)OCC(O)C(=O)C	O=N(=O)OCC(O)C(=O)C	HMVKANO3	149.102	3.2e-05	0.00320192	Muller et al., 2014, ACP	30 (TUV: jNO2=9.994E-03, converted to joverhead before included in the database)
163	Carbonyl Nitrates	2-Oxo-cyclohexyl-1-nitrate; 2-nitrooxycyclohexanone;		/	6	4	1	C1CCC(=O)C(C1)O[N+](=O)[O-]	not included	not included	159.14	2.19e-05	0.00200917	Calvert et al., 2011	0
164	Carbonyl Nitrates	1,4-Dinitrooxy-2-butene		/	4	6	2	C(C=CCO[N+](=O)[O-])O[N+](=O)[O-]	O=N(=O)OCC=CCON(=O)=O	NBUTDBNO3	178.1	6.76e-06	0.000620183	Calvert et al., 2011	0
165	Carbonyl Nitrates	3,4-Dinitrooxy-1-butene		22615-23-2	4	6	2	C=CC(CO[N+](=O)[O-])O[N+](=O)[O-]	not included	not included	178.1	6.53e-06	0.000599083	Calvert et al., 2011	0
166	Alkyl nitrites	Methyl Nitrite		624-91-9	1	2	1	CON=O	not included	not included	61.04	0.00179	0.16422	Calvert et al., 2011	0
167	Alkyl nitrites	Methyl Nitrite		624-91-9	1	2	1	CON=O	not included	not included	61.04	0.00229	0.210092	Calvert et al., 2011	0
168	Alkyl nitrites	Ethyl Nitrite		109-95-5	2	2	1	CCON=O	not included	not included	75.07	0.000584	0.053578	Calvert et al., 2011	0
169	Alkyl nitrites	n-Propyl Nitrite		543-67-9	3	2	1	CCCON=O	not included	not included	89.09	0.000767	0.070367	Calvert et al., 2011	0
170	Alkyl nitrites	iso-Propyl Nitrite		541-42-4	3	2	1	CC(C)ON=O	not included	not included	89.09	0.00074	0.0678899	Calvert et al., 2011	0
171	Alkyl nitrites	tert-Butyl Nitrite		540-80-7	4	2	1	CC(C)(C)ON=O	not included	not included	103.12	0.00381	0.349541	Calvert et al., 2011	0
172	Alkyl nitrites	n-Butyl Nitrite		544-16-1	4	2	1	CCCCON=O	not included	not included	103.12	0.000437	0.0400917	Calvert et al., 2011	0
173	Alkyl nitrites	iso-Butyl Nitrite		542-56-3	4	2	1	CC(C)CON=O	not included	not included	103.12	0.000509	0.0466972	Calvert et al., 2011	0
174	N-Nitrosamines	Dimethylnitrosamine; N-nitroso dimethylamine (NDMA)		62-75-9	2	1	2	CN(C)N=O	not included	not included	74.0818	0.00275	0.252294	Calvert et al., 2011	0
175	N-Nitrosamines	Dimethylnitrosamine; N-nitroso dimethylamine (NDMA)		62-75-9	2	1	2	CN(C)N=O	not included	not included	74.0818		0.53	Tuazon et al., 1984, EST	black-lamps
176	N-Nitrosamines	Dimethylnitrosamine; N-nitroso dimethylamine (NDMA)		62-75-9	2	1	2	CN(C)N=O	not included	not included	74.0818		0.34	C. J. Nielsen et al., 2012, CSR	natural sunlight experiments at EUPHORE
177	N-Nitrosamines	N-Nitroso diethylamine		55-18-5	4	1	2	CCN(CC)N=O	not included	not included			0.34	C. J. Nielsen et al., 2012, CSR	natural sunlight experiments at EUPHORE
178	N-Nitrosamines	N-Nitroso methylethylamine		10595-95-6	3	1	2	CCN(C)N=O	not included	not included			0.32	C. J. Nielsen et al., 2012, CSR	natural sunlight experiments at EUPHORE
179	N-Nitrosamines	N-Nitroso methylpropylamine		924-46-9	4	1	2	CCCN(C)N=O	not included	not included			0.32	C. J. Nielsen et al., 2012, CSR	natural sunlight experiments at EUPHORE
180	N-Nitrosamines	N-Nitroso methylbutylamine		7068-83-9	5	1	2	CCCCN(C)N=O	not included	not included			0.34	C. J. Nielsen et al., 2012, CSR	natural sunlight experiments at EUPHORE
181	N-Nitrosamines	N-Nitroso morpholine		59-89-2	4	2	2	C1COCCN1N=O	not included	not included			0.34	C. J. Nielsen et al., 2012, CSR	natural sunlight experiments at EUPHORE
182	N-Nitrosamines	N-Nitroso piperazine		5632-47-3	4	1	3	C1CN(CCN1)N=O	not included	not included			0.34	C. J. Nielsen et al., 2012, CSR	natural sunlight experiments at EUPHORE
183	N-Nitrosamines	N-Nitroso piperidine		100-75-4	5	1	2	C1CCN(CC1)N=O	not included	not included			0.31	C. J. Nielsen et al., 2012, CSR	natural sunlight experiments at EUPHORE
184	N-Nitrosamines	N-Nitroso pyrazine		/	4	1	3	O=NN1CC=NC=C1	not included	not included			0.35	C. J. Nielsen et al., 2012, CSR	natural sunlight experiments at EUPHORE
185	Keto Acids	pyruvic acid		127-17-3	3	3	0	CC(=O)C(=O)O	OC(=O)C(=O)C	CH3COCO2H	88.06	7.73659e-05	0.00707184	IUPAC	0
186	Keto Acids	pyruvic acid		127-17-3	3	3	0	CC(=O)C(=O)O	OC(=O)C(=O)C	CH3COCO2H	88.06	4e-05	0.00365631	Eger et al., 2020, ACP	0
187	Keto Acids	pyruvic acid		127-17-3	3	3	0	CC(=O)C(=O)O	OC(=O)C(=O)C	CH3COCO2H	88.06	0.000421	0.0386239	Calvert et al., 2011	0 assumed φtotal = 1.0, independent of λ;
188	Keto Acids	pyruvic acid		127-17-3	3	3	0	CC(=O)C(=O)O	OC(=O)C(=O)C	CH3COCO2H	88.06	0.000359	0.0329358	Calvert et al., 2011	0 φtotal = 1 for λ<370 nm, and 0 for λ >370 nm;
189	Keto Acids	pyruvic acid		127-17-3	3	3	0	CC(=O)C(=O)O	OC(=O)C(=O)C	CH3COCO2H	88.06	0.000118	0.0108257	Calvert et al., 2011	φtotal = 0.28 at all λ to fit EUPHORE estimates
190	Peroxy Acids	Peracetic acid		79-21-0	2	3	0	CC(=O)OO	CC(=O)OO	CH3CO3H	76.05	9.33937e-07	8.5369e-05	IUPAC	0
191	Hydroperoxides	Methyl hydroperoxide		3031-73-0	1	2	0	COO	COO	CH3OOH	48.041	6.21258e-06	0.000567877	IUPAC	0
192	Hydroperoxides	Methyl hydroperoxide		3031-73-0	1	2	0	COO	COO	CH3OOH	48.041	5.98e-06	0.000548624	Calvert et al., 2011	0
193	Hydroperoxides	hydroxymethyl hydroperoxide		15932-89-5	1	3	0	C(O)OO	not included	not included	64.041	6.00002e-06	0.000548448	IUPAC	0
194	Hydroperoxides	hydroxymethyl hydroperoxide		15932-89-5	1	3	0	C(O)OO	not included	not included	64.041	5.74e-06	0.000526606	Calvert et al., 2011	0
195	Anhydrides	maleic anhydride		108-31-6	4	3	0	C1=CC(=O)OC1=O	O=C1C=CC(=O)O1	MALANHY	98.06	0.000104682	0.00956876	Marshall et al., 2019, JPPAC	0 (Temperature: 296K)

## Sheet: 2 Averaged Dataset
No.	SpeciesType	Species Name	nC	Jrel_avg	Jrel_std	Joverhead, s-1 (when jNO2(sza=0) = 0.01094 s-1)	Photolysis Lifetime under overhead sun, h-1
1	Acyclic Aldehydes	formaldehyde	1	0.00854028	0.000485524	9.34307e-05	2.97309
1	Acyclic Aldehydes	acetaldehyde	2	0.000584004	0.000207399	6.389e-06	43.4775
3	Acyclic Aldehydes	propionaldehyde; propanal;	3	0.0024127	0.00230729	2.6395e-05	10.5239
4	Acyclic Aldehydes	n-butyraldehyde; n-butanal;	4	0.00187868	0.000113479	2.05528e-05	13.5153
5	Acyclic Aldehydes	Isobutanal	4	0.00575935	0.000731012	6.30073e-05	4.40866
6	Acyclic Aldehydes	Pentanal	5	0.00164836	4.26947e-06	1.8033e-05	15.4038
7	Acyclic Aldehydes	Isopentaldehyde; 3-Methylbutanal;	5	0.00165751	4.29319e-06	1.81332e-05	15.3187
8	Acyclic Aldehydes	2,2-Dimethylpropanal; Pivaldehyde;	5	0.00219915	0.000880746	2.40587e-05	11.5458
9	Acyclic Aldehydes	Hexanal	6	0.00220697	5.71634e-06	2.41442e-05	11.5049
10	Acyclic Aldehydes	n-heptanal	7	0.00103513	0.000165608	1.13243e-05	24.5294
11	Cyclic Aldehydes	oxirane-2-carbaldehyde; glycidaldehyde;	3	0.00675953	0.000416076	7.39493e-05	3.75633
13	Unsaturated Aldehydes	Acrolein; 2-Propenal	3	0.000130037	3.36814e-07	1.42261e-06	195.26
14	Unsaturated Aldehydes	2-methylpropenal; methacrolein; MACR;	4	0.000440845	0.000239021	4.82285e-06	57.5962
15	Unsaturated Aldehydes	2-Butenal; Crotonaldehyde	4	0.000604205	NaN	6.61e-06	42.0239
16	Unsaturated Aldehydes	cis/trans-2-Hexenal	6	0.00932358	NaN	0.000102	2.72331
12	Unsaturated Aldehydes	2,4-Hexadienal	6	0.0258929	NaN	0.000283268	0.980619
17	Acycli Ketones	Acetone	3	7.25897e-05	2.23556e-05	7.94131e-07	349.788
18	Acycli Ketones	methyl ethyl ketone; MEK;2-butanone;	4	0.000452365	3.25375e-05	4.94888e-06	56.1295
19	Acycli Ketones	2-Pentanone	5	0.000194495	7.13594e-05	2.12778e-06	130.548
20	Acycli Ketones	2-Hexanone	6	0.000432569	0.0004314	4.7323e-06	58.6982
21	Acycli Ketones	4-methyl-2-pentanone	6	0.00247095	NaN	2.70322e-05	10.2758
22	Acycli Ketones	2,4-dimethyl-3-pentanone	7	0.00377189	NaN	4.12645e-05	6.73164
23	Acycli Ketones	5-methyl-2-hexanone	7	0.00194534	NaN	2.1282e-05	13.0522
24	Cyclic Ketones	Cyclopropanone	3	0.033945	NaN	0.000371358	0.748006
25	Cyclic Ketones	Cyclobutanone	4	0.00241284	NaN	2.63965e-05	10.5233
26	Unsaturated Ketones	Ketene	2	0.026422	NaN	0.000289057	0.96098
27	Unsaturated Ketones	methyl vinyl ketone; MVK	4	0.000334439	0.000140722	3.65876e-06	75.9212
28	Hydroxy Aldehydes and Ketones	Glycolaldehyde	2	0.00118059	0.000302642	1.29157e-05	21.507
29	Hydroxy Aldehydes and Ketones	Hydroxyacetone	3	0.000165418	6.03935e-05	1.80967e-06	153.496
30	Hydroxy Aldehydes and Ketones	4-Hydroxy-2-butanone	4	0.000134572	NaN	1.47222e-06	188.679
31	Hydroxy Aldehydes and Ketones	3-Hydroxy-3-methyl-2-butanone	5	0.00082	NaN	8.9708e-06	30.9647
32	Hydroxy Aldehydes and Ketones	Diacetone alcohol; 4-hydroxy-4-methyl-2-pentanone;	6	0.00062	NaN	6.7828e-06	40.9533
33	Hydroxy Aldehydes and Ketones	4-Hydroxyhexan-3-one	6	0.00051	NaN	5.5794e-06	49.7863
34	Dialdehydes	glyoxal	2	0.0145342	0.00259158	0.000159004	1.74699
35	Unsaturated Dialdehydes	Maleic dialdehyde; 2-Butenedial;	4	0.1345	0.0324183	0.00147143	0.188781
36	Unsaturated Dialdehydes	4-oxopent-2-enal; Acetylacrolein	5	0.116632	0.062826	0.00127595	0.217703
37	Unsaturated Dialdehydes	E,E-2,4-Hexadienedial	6	0.0214808	0.00323175	0.000235	1.18203
38	Diketones	2,3-Butanedione; biacetyl;	4	0.0232179	0.00589395	0.000254004	1.0936
39	Diketones	2,3-pentanedione; PTD;	5	0.034	NaN	0.00037196	0.746795
40	Unsaturated Diketones	cis/trans-3-Hexene-2,5-dione	6	0.00420183	0.000194617	4.59681e-05	6.04284
41	Ketoaldehydes	Methylglyoxal	3	0.0138833	0.00104797	0.000151883	1.82889
42	Ketoaldehydes	Pinonaldehyde	10	0.00180896	0.00140271	1.979e-05	14.0363
43	Aromatic Aldehydes	Benzaldehyde	7	0.0180409	0.0135615	0.000197367	1.40742
44	Aromatic Aldehydes	o-tolualdehyde	8	0.0182815	NaN	0.0002	1.38889
45	Aromatic Aldehydes	Phthaldialdehyde	8	0.0755046	NaN	0.00082602	0.336284
46	Aromatic Aldehydes	2-Acetylbenzaldehyde	9	0.0813761	NaN	0.000890255	0.31202
47	Aromatic Aldehydes	2-Nitrobenzaldehyde / o-Nitrobenzaldehyde	7	0.478591	0.275493	0.00523579	0.0530537
48	Other Aromatics	Benzene oxide	6	0.0397248	NaN	0.000434589	0.639174
49	Other Aromatics	Oxepin	6	0.0397248	NaN	0.000434589	0.639174
50	Other Aromatics	Nitrobenzene	6	0.00188991	NaN	2.06756e-05	13.4351
51	Other Aromatics	2-nitrophenol	6	0.0147258	NaN	0.0001611	1.72425
52	Other Aromatics	3-methyl-2-nitrophenol; 3M2NP;	7	0.00980334	NaN	0.000107249	2.59004
53	Other Aromatics	4-methyl-2-nitrophenol; 4M2NP;	7	0.0121174	NaN	0.000132565	2.09542
54	Other Aromatics	2-Methyl-1-nitronaphthalene	11	0.0152294	NaN	0.000166609	1.66724
55	Other Aromatics	Toluene oxide	7	0.0358716	NaN	0.000392435	0.707832
56	Other Aromatics	Methyloxepin	7	0.0358716	NaN	0.000392435	0.707832
57	Alkyl Nitrates	Methyl nitrate	1	0.00011193	7.7893e-06	1.22451e-06	226.848
58	Alkyl Nitrates	Ethyl nitrate	2	0.000154962	4.13992e-05	1.69528e-06	163.853
59	Alkyl Nitrates	n-propyl nitrate	3	0.000190129	3.66408e-05	2.08001e-06	133.546
60	Alkyl Nitrates	Isopropyl nitrate	3	0.00028986	2.06907e-05	3.17107e-06	87.5976
61	Alkyl Nitrates	2-Hydroxyethyl nitrate; 2-Nitrooxy ethanol;	2	8.84404e-06	NaN	9.67538e-08	2870.98
62	Alkyl Nitrates	tert-butyl nitrate	4	0.000765138	NaN	8.37061e-06	33.1849
63	Alkyl Nitrates	1-Butyl nitrate	4	0.000178444	4.60638e-05	1.95217e-06	142.292
64	Alkyl Nitrates	2-Butyl nitrate	4	0.000205243	NaN	2.24536e-06	123.712
65	Alkyl Nitrates	Cyclopentyl nitrate	5	8.26606e-05	NaN	9.04306e-07	307.172
66	Alkyl Nitrates	2-Pentyl nitrate	5	0.000236697	NaN	2.58947e-06	107.272
67	Alkyl Nitrates	3-Pentyl nitrate	5	0.000231193	NaN	2.52925e-06	109.826
68	Alkyl Nitrates	1,2-Propanediol dinitrate	3	0.0010367	NaN	1.13415e-05	24.4922
69	Alkyl Nitrates	1,2-Butanediol dinitrate; 1,2-BUTYL DINITRATE;	4	0.00141284	NaN	1.54565e-05	17.9716
70	Alkyl Nitrates	2,3-Butanediol dinitrate	4	0.00109174	NaN	1.19437e-05	23.2573
71	Alkyl Nitrates	1-Methyl-cyclohexyl-1,2-dinitrate	7	0.000488073	NaN	5.33952e-06	52.023
72	Peroxy Nitrates	Peroxypropionyl nitrate	3	0.000143119	NaN	1.56572e-06	177.412
73	Peroxy Nitrates	Peroxyacetyl nitrate; PAN;	2	8.53103e-05	4.78523e-06	9.33294e-07	297.631
74	Peroxy Nitrates	methyl peroxynitrate	1	0.000544521	NaN	5.95706e-06	46.63
75	Carbonyl Nitrates	2-oxoethyl nitrate; Nitroxy ethanal;	2	0.015009	NaN	0.000164199	1.69172
76	Carbonyl Nitrates	2-oxopropyl nitrate; NOA;	3	0.00399917	0.000866749	4.37509e-05	6.34907
77	Carbonyl Nitrates	1-Nitrooxy-2-butanone; 2-Oxobutyl nitrate;	4	0.00191743	NaN	2.09767e-05	13.2422
78	Carbonyl Nitrates	4-Nitrooxy-2-butanone	4	0.0059	NaN	6.4546e-05	4.30356
79	Carbonyl Nitrates	3-Nitrooxy-2-butanone	4	0.00563847	0.000422886	6.16849e-05	4.50317
80	Carbonyl Nitrates	3-Methyl-4-nitroxy-2-butenal; NC4CHO;	5	0.0560336	NaN	0.000613008	0.453139
81	Carbonyl Nitrates	5-Nitrooxy-2-pentanone; 4-oxopentyl nitrate;	5	0.0032	NaN	3.5008e-05	7.93469
82	Carbonyl Nitrates	3-methyl-3-nitrooxy-2-butanone	5	0.00770833	NaN	8.43292e-05	3.29397
83	Carbonyl Nitrates	MACRNO3;	4	0.035021	NaN	0.00038313	0.725022
84	Carbonyl Nitrates	MVKNO3;	4	0.00560336	NaN	6.13008e-05	4.53139
85	Carbonyl Nitrates	HMVKANO3;	4	0.00320192	NaN	3.5029e-05	7.92993
86	Carbonyl Nitrates	2-Oxo-cyclohexyl-1-nitrate; 2-nitrooxycyclohexanone;	6	0.00200917	NaN	2.19804e-05	12.6375
87	Carbonyl Nitrates	1,4-Dinitrooxy-2-butene	4	0.000620183	NaN	6.78481e-06	40.9411
88	Carbonyl Nitrates	3,4-Dinitrooxy-1-butene	4	0.000599083	NaN	6.55396e-06	42.3832
89	Alkyl Nitrites	Methyl Nitrite	1	0.187156	0.0324361	0.00204749	0.135668
90	Alkyl Nitrites	Ethyl Nitrite	2	0.053578	NaN	0.000586143	0.473908
91	Alkyl Nitrites	n-Propyl Nitrite	3	0.070367	NaN	0.000769815	0.360837
92	Alkyl Nitrites	iso-Propyl Nitrite	3	0.0678899	NaN	0.000742716	0.374003
93	Alkyl Nitrites	tert-Butyl Nitrite	4	0.349541	NaN	0.00382398	0.072641
94	Alkyl Nitrites	n-Butyl Nitrite	4	0.0400917	NaN	0.000438604	0.633323
95	Alkyl Nitrites	iso-Butyl Nitrite	4	0.0466972	NaN	0.000510868	0.543737
96	N-Nitrosamines	Dimethylnitrosamine; N-nitroso dimethylamine (NDMA)	2	0.374098	0.141958	0.00409263	0.0678727
97	N-Nitrosamines	N-Nitroso diethylamine	4	0.34	NaN	0.0037196	0.0746795
98	N-Nitrosamines	N-Nitroso methylethylamine	3	0.32	NaN	0.0035008	0.0793469
99	N-Nitrosamines	N-Nitroso methylpropylamine	4	0.32	NaN	0.0035008	0.0793469
100	N-Nitrosamines	N-Nitroso methylbutylamine	5	0.34	NaN	0.0037196	0.0746795
101	N-Nitrosamines	N-Nitroso morpholine	4	0.34	NaN	0.0037196	0.0746795
102	N-Nitrosamines	N-Nitroso piperazine	4	0.34	NaN	0.0037196	0.0746795
103	N-Nitrosamines	N-Nitroso piperidine	5	0.31	NaN	0.0033914	0.0819065
104	N-Nitrosamines	N-Nitroso pyrazine	4	0.35	NaN	0.003829	0.0725458
105	Keto Acids	pyruvic acid	3	0.0186227	0.0159931	0.000203732	1.36345
106	Peroxy Acids	Peracetic acid	2	8.5369e-05	NaN	9.33937e-07	297.427
107	Hydroperoxides	Methyl hydroperoxide	1	0.000558251	1.36143e-05	6.10726e-06	45.4832
108	Hydroperoxides	hydroxymethyl hydroperoxide	1	0.000537527	1.54446e-05	5.88054e-06	47.2368
109	Anhydrides	maleic anhydride	4	0.00956876	NaN	0.000104682	2.65353

## Sheet: 3 Species Used for RV
Reference Value Name	SpeciesType	Species Name	Jrel_avg	Jrel_std	CAS	CanonicalSMILES	MCMName	MW	nC	nH	nO	nN	OSc
1 NitroBenzal
	Aromatic Aldehydes	2-Nitrobenzaldehyde / o-Nitrobenzaldehyde	0.478591	0.275493	552-89-6	C1=CC=C(C(=C1)C=O)[N+](=O)[O-]	not included	151.12	7	5	3	1	-0.571429
2 NNO
	N-Nitrosamine	Dimethylnitrosamine; N-nitroso dimethylamine (NDMA)	0.374098	0.141958	62-75-9	CN(C)N=O	not included	74.0818	2	6	1	2	1
	N-Nitrosamine	N-Nitroso methylethylamine	0.32	NaN	10595-95-6	CCN(C)N=O	not included	88.11	3	8	1	2	0
	N-Nitrosamine	N-Nitroso diethylamine	0.34	NaN	55-18-5	CCN(CC)N=O	not included	102.14	4	10	1	2	-0.5
	N-Nitrosamine	N-Nitroso methylpropylamine	0.32	NaN	924-46-9	CCCN(C)N=O	not included	102.14	4	10	1	2	-0.5
	N-Nitrosamine	N-Nitroso morpholine	0.34	NaN	59-89-2	C1COCCN1N=O	not included	116.12	4	8	2	2	-3.5
	N-Nitrosamine	N-Nitroso piperazine	0.34	NaN	5632-47-3	C1CN(CCN1)N=O	not included	115.14	4	9	1	3	0.5
	N-Nitrosamine	N-Nitroso pyrazine	0.35	NaN	/	O=NN1CC=NC=C1	not included	111.1	4	5	1	3	1.5
	N-Nitrosamine	N-Nitroso methylbutylamine	0.34	NaN	7068-83-9	CCCCN(C)N=O	not included	116.16	5	12	1	2	-0.8
	N-Nitrosamine	N-Nitroso piperidine	0.31	NaN	100-75-4	C1CCN(CC1)N=O	not included	114.15	5	10	1	2	-0.4
3 UNDICHO
	Unsaturated Dialdehydes	Maleic dialdehyde; 2-Butenedial;	0.1345	0.0324183	2363-83-9 / 3675-14-7	C(=CC=O)C=O	MALDIAL	84.07	4	4	2	0	0
	Unsaturated Dialdehydes	4-oxopent-2-enal; Acetylacrolein	0.116632	0.062826	5729-47-5	CC(=O)C=CC=O	C5DICARB	98.0999	5	6	2	0	-0.4
4 ONO
	Alkyl Nitrites	Methyl Nitrite	0.187156	0.0324361	624-91-9	CON=O	not included	61.04	1	3	2	1	-4
	Alkyl Nitrites	Ethyl Nitrite	0.053578	NaN	109-95-5	CCON=O	not included	75.07	2	5	2	1	-3
	Alkyl Nitrites	n-Propyl Nitrite	0.070367	NaN	543-67-9	CCCON=O	not included	89.09	3	7	2	1	-2.66667
	Alkyl Nitrites	n-Butyl Nitrite	0.0400917	NaN	544-16-1	CCCCON=O	not included	103.12	4	9	2	1	-2.5
5 COCO
	Diketones	2,3-Butanedione; biacetyl;	0.0232179	0.00589395	431-03-8	CC(=O)C(=O)C	BIACET	86.09	4	6	2	0	-0.5
	Diketones	2,3-pentanedione; PTD;	0.034	NaN	600-14-6	CCC(=O)C(=O)C	CO23C5	100.116	5	8	2	0	-0.8
6 Dienedial
	Unsaturated Dialdehydes	E,E-2,4-Hexadienedial	0.0214808	0.00323175	3249-28-3	C(=CC=O)C=CC=O	MUCONALD1	110.11	6	6	2	0	-0.333333
	Unsaturated Aldehydes	2,4-Hexadienal	0.0258929	NaN	142-83-6	CC=CC=CC=O	not included	96.13	6	8	1	0	-1
7 COCOOH
	Keto Acids	pyruvic acid	0.0186227	0.0159931	127-17-3	CC(=O)C(=O)O	CH3COCO2H	88.06	3	4	3	0	0.666667
8 AroCHO
	Aromatic Aldehydes	Benzaldehyde	0.0180409	0.0135615	100-52-7	C1=CC=C(C=C1)C=O	BENZAL	106.12	7	6	1	0	-0.571429
	Aromatic Aldehydes	o-tolualdehyde	0.0182815	NaN	529-20-4	CC1=CC=CC=C1C=O	OXYLAL	120.15	8	8	1	0	-0.75
9 OCHCHO
	Dialdehydes	Glyoxal	0.0145342	0.00259158	107-22-2	C(=O)C=O	GLYOX	58.036	2	2	2	0	1
	Ketoaldehydes	Methylglyoxal	0.0138833	0.00104797	78-98-8	CC(=O)C=O	MGLYOX	72.0627	3	4	2	0	0
10 NP
	Other Aromatics	2-nitrophenol	0.0147258	NaN	88-75-5	C1=CC=C(C(=C1)[N+](=O)[O-])O	HOC6H4NO2	139.11	6	5	3	1	-0.666667
	Other Aromatics	3-methyl-2-nitrophenol; 3M2NP;	0.00980334	NaN	4920-77-8	CC1=C(C(=CC=C1)O)[N+](=O)[O-]	not included	153.14	7	7	3	1	-0.857143
	Other Aromatics	4-methyl-2-nitrophenol; 4M2NP;	0.0121174	NaN	119-33-5	CC1=CC(=C(C=C1)O)[N+](=O)[O-]	TOL4OHNO2	153.14	7	7	3	1	-0.857143
11 COONO2
	Carbonyl Nitrates	2-oxopropyl nitrate; α-Nitrooxy acetone; NOA;	0.00399917	0.000866749	6745-71-7	CC(=O)CO[N+](=O)[O-]	NOA	119.076	3	5	4	1	-0.666667
	Carbonyl Nitrates	1-Nitrooxy-2-butanone; 2-Oxobutyl nitrate;	0.00191743	NaN	138779-12-1	CCC(=O)CO[N+](=O)[O-]	CO3C4NO3	133.103	4	7	4	1	-1
	Carbonyl Nitrates	4-Nitrooxy-2-butanone	0.0059	NaN	/	CC(=O)CCO[N+](=O)[O-]	MEKANO3	133.103	4	7	4	1	-1
	Carbonyl Nitrates	3-Nitrooxy-2-butanone	0.00563847	0.000422886	124855-10-3	CC(C(=O)C)O[N+](=O)[O-]	BUTONENO3	133.103	4	7	4	1	-1
	Carbonyl Nitrates	5-Nitrooxy-2-pentanone; 4-oxopentyl nitrate;	0.0032	NaN	/	CC(=O)CCCO[N+](=O)[O-]	not included	147.129	5	9	4	1	-1.2
	Carbonyl Nitrates	3-methyl-3-nitrooxy-2-butanone	0.00770833	NaN	/	CC(=O)C(C)(C)O[N+](=O)[O-]	C4M2NO3ONE	147.129	5	9	4	1	-1.2
12 CycloCO
	Cyclic Ketones	Cyclopropanone	0.033945	NaN	5009-27-8	C1CC1=O	not included	56.06	3	4	1	0	-0.666667
	Cyclic Ketones	Cyclobutanone	0.00241284	NaN	1191-95-3	C1CC(=O)C1	not included	70.09	4	6	1	0	-1
13 CHO
	Acyclic Aldehydes	Formaldehyde	0.00854028	0.000485524	50-00-0	C=O	HCHO	30.03	1	2	1	0	0
	Acyclic Aldehydes	Acetaldehyde	0.000584004	0.000207399	75-07-0	CC=O	CH3CHO	44.05	2	4	1	0	-1
	Acyclic Aldehydes	Propionaldehyde;propanal;	0.0024127	0.00230729	123-38-6	CCC=O	C2H5CHO	58.08	3	6	1	0	-1.33333
	Acyclic Aldehydes	n-Butyraldehyde;n-Butanal;	0.00187868	0.000113479	123-72-8	CCCC=O	C3H7CHO	72.11	4	8	1	0	-1.5
	Acyclic Aldehydes	Pentanal	0.00164836	4.26947e-06	110-62-3	CCCCC=O	C4H9CHO	86.1323	5	10	1	0	-1.6
	Acyclic Aldehydes	Hexanal	0.00220697	5.71634e-06	66-25-1	CCCCCC=O	C5H11CHO	100.159	6	12	1	0	-1.66667
	Acyclic Aldehydes	n-Heptanal	0.00103513	0.000165608	111-71-7	CCCCCCC=O	C6H13CHO	114.186	7	14	1	0	-1.71429
14 AroNO2
	Other Aromatics	Nitrobenzene	0.00188991	NaN	98-95-3	C1=CC=C(C=C1)[N+](=O)[O-]	not included	123.11	6	5	2	1	-1
15 CO
	Acycli Ketones	Acetone	7.25897e-05	2.23556e-05	67-64-1	CC(=O)C	CH3COCH3	58.0791	3	6	1	0	-1.33333
	Acycli Ketones	methyl ethyl ketone; MEK;2-butanone;	0.000452365	3.25375e-05	78-93-3	CCC(=O)C	MEK	72.11	4	8	1	0	-1.5
	Acycli Ketones	2-Pentanone	0.000194495	7.13594e-05	107-87-9	CCCC(=O)C	MPRK	86.13	5	10	1	0	-1.6
	Acycli Ketones	2-Hexanone	0.000432569	0.0004314	591-78-6	CCCCC(=O)C	HEX2ONE	100.16	6	12	1	0	-1.66667
16 COOH
	Hydroperoxides	Methyl hydroperoxide	0.000558251	1.36143e-05	3031-73-0	COO	CH3OOH	48.041	1	4	2	0	0
17 UNCO
	Unsaturated Ketones	Ketene	0.026422	NaN	463-51-4	C=C=O	not included	42.04	2	2	1	0	0
	Unsaturated Ketones	methyl vinyl ketone; MVK;	0.000334439	0.000140722	78-94-4	CC(=O)C=C	MVK	70.09	4	6	1	0	-1
18 UNCHO
	Unsaturated Aldehydes	Acrolein; 2-Propenal	0.000130037	3.36814e-07	107-02-8	C=CC=O	ACR	56.06	3	4	1	0	-0.666667
	Unsaturated Aldehydes	2-methylpropenal; methacrolein; MACR;	0.000440845	0.000239021	78-85-3	CC(=C)C=O	MACR	70.09	4	6	1	0	-1
	Unsaturated Aldehydes	2-Butenal; Crotonaldehyde	0.000604205	NaN	123-73-9	CC=CC=O	C4ALDB	70.09	4	6	1	0	-1
19 ONO2
	Alkyl Nitrates	Methyl nitrate	0.00011193	7.7893e-06	598-58-3	CO[N+](=O)[O-]	CH3NO3	77.0394	1	3	3	1	-2
	Alkyl Nitrates	Ethyl nitrate	0.000154962	4.13992e-05	625-58-1	CCO[N+](=O)[O-]	C2H5NO3	91.066	2	5	3	1	-2
	Alkyl Nitrates	n-Propyl nitrate	0.000190129	3.66408e-05	627-13-4	CCCO[N+](=O)[O-]	NC3H7NO3	105.093	3	7	3	1	-2
	Alkyl Nitrates	1-Butyl nitrate	0.000178444	4.60638e-05	928-45-0	CCCCO[N+](=O)[O-]	NC4H9NO3	119.12	4	9	3	1	-2
	Alkyl Nitrates	2-Butyl nitrate	0.000205243	NaN	924-52-7	CCC(C)O[N+](=O)[O-]	SC4H9NO3	119.12	4	9	3	1	-2
	Alkyl Nitrates	2-Pentyl nitrate	0.000236697	NaN	21981-48-6	CCCC(C)O[N+](=O)[O-]	PEBNO3	133.15	5	11	3	1	-2
	Alkyl Nitrates	3-Pentyl nitrate	0.000231193	NaN	82944-59-0	CCC(CC)O[N+](=O)[O-]	PECNO3	133.15	5	11	3	1	-2
20 COOONO2
	Peroxy Nitrates	Peroxyacetyl nitrate; PAN;	8.53103e-05	4.78523e-06	2278-22-0	CC(=O)OO[N+](=O)[O-]	PAN	121.05	2	3	5	1	1
	Peroxy Nitrates	Peroxypropionyl nitrate	0.000143119	NaN	5796-89-4	CCC(=O)OO[N+](=O)[O-]	PPN	135.076	3	5	5	1	2.22045e-16
21 COOOH
	Peroxy Acid	Peracetic acid	8.5369e-05	NaN	79-21-0	CC(=O)OO	CH3CO3H	76.05	2	4	3	0	1

## Sheet: 4 Species Used for Coeff
Adjustment Coeff.	SpeciesType	Species Name	Jrel_avg	Jrel_std	CAS	Canonical SMILES	MCMName	MW	nC	nH	nO	nN	OSc
1 Branched Aldehydes
	Acyclic Aldehydes	n-butyraldehyde; n-butanal;	0.00187868	0.000113479	123-72-8	CCCC=O	C3H7CHO	72.11	4	8	1	0	-1.5
	Acyclic Aldehydes	Isobutanal	0.00575935	0.000731012	78-84-2	CC(C)C=O	IPRCHO	72.11	4	8	1	0	-1.5
2 Branched Ketones
	Acycli Ketones	2-Pentanone	0.000194495	7.13594e-05	107-87-9	CCCC(=O)C	MPRK	86.13	5	10	1	0	-1.6
	Reference Value of ketones containing 6 carbon atoms		0.000433	0.0004314
	Acycli Ketones	4-methyl-2-pentanone	0.00247095	NaN	108-10-1	CC(C)CC(=O)C	MIBK	100.16	6	12	1	0	-1.66667
	Acycli Ketones	2-Hexanone	0.000432569	0.0004314	591-78-6	CCCCC(=O)C	HEX2ONE	100.16	6	12	1	0	-1.66667
	Reference Value of ketones containing 7 carbon atoms		0.000288	0.000185347
	Acycli Ketones	5-methyl-2-hexanone	0.00194534	NaN	110-12-3	CC(C)CCC(=O)C	M2CO5C6	114.19	7	14	1	0	-1.71429
	Acycli Ketones	2-Pentanone	0.000194495	7.13594e-05	107-87-9	CCCC(=O)C	MPRK	86.13	5	10	1	0	-1.6
	Reference Value of ketones containing 7 carbon atoms		0.000288	0.000185347
	Acycli Ketones	2,4-dimethyl-3-pentanone	0.00377189	NaN	565-80-0	CC(C)C(=O)C(C)C	not included	114.19	7	14	1	0	-1.71429
3 Hydroperoxides
	Hydroperoxides	Methyl hydroperoxide	0.000558251	1.36143e-05	3031-73-0	COO	CH3OOH	48.041	1	4	2	0	0
	Hydroperoxides	hydroxymethyl hydroperoxide	0.000537527	1.54446e-05	15932-89-5	C(O)OO	not included	64.041	1	4	3	0	2
4 Carbonyl Nitrates
	Reference Value of COONO2 containing 2 carbon atoms		0.00465	NaN	625-58-1	CCO[N+](=O)[O-]	C2H5NO3	91.066	2	5	3	1	-2
	Carbonyl Nitrates	2-oxoethyl nitrate; Nitroxy ethanal;	0.015009	NaN	/	C(C=O)O[N+](=O)[O-]	NO3CH2CHO	105.049	2	3	4	1	0
	Reference Value of COONO2 containing 6 carbon atoms		0.00465	0.000743034
	Carbonyl Nitrates	2-Oxo-cyclohexyl-1-nitrate; 2-nitrooxycyclohexanone;	0.00200917	NaN	/	C1CCC(=O)C(C1)O[N+](=O)[O-]	CYHXONANO3是结构类似的物质!	159.14	6	9	4	1	-1
	Carbonyl Nitrates	5-Nitrooxy-2-pentanone; 4-oxopentyl nitrate;	0.0032	NaN	/	CC(=O)CCCO[N+](=O)[O-]	not included	147.129	5	9	4	1	-1.2
	Carbonyl Nitrates	3-methyl-3-nitrooxy-2-butanone	0.00770833	NaN	/	CC(=O)C(C)(C)O[N+](=O)[O-]	C4M2NO3ONE	147.129	5	9	4	1	-1.2
	Reference Value of COONO2 containing 5 carbon atoms		0.005455	0.00318905
	reference value of COONO2 containing 5 carbon atoms after aldehyde carbonyl substitution		0.0176071
	Carbonyl Nitrates	3-Methyl-4-nitroxy-2-butenal; NC4CHO;	0.0560336	NaN	/	CC(=CC=O)CO[N+](=O)[O-]	NC4CHO	145.113	5	7	4	1	-0.8
5 Alkyl Nitrates
	Alkyl Nitrates	n-propyl nitrate	0.000190129	3.66408e-05	627-13-4	CCCO[N+](=O)[O-]	NC3H7NO3	105.093	3	7	3	1	-2
	Alkyl Nitrates	1,2-Propanediol dinitrate	0.0010367	NaN	/	CC(CO[N+](=O)[O-])O[N+](=O)[O-]	not included	166.09	3	6	6	2	-1.33333
	Alkyl Nitrates	1-Butyl nitrate	0.000178444	4.60638e-05	928-45-0	CCCCO[N+](=O)[O-]	NC4H9NO3	119.12	4	9	3	1	-2
	Alkyl Nitrates	2-Butyl nitrate	0.000205243	NaN	924-52-7	CCC(C)O[N+](=O)[O-]	SC4H9NO3	119.12	4	9	3	1	-2
	Reference Value of ONO2 containing 4 carbon atoms		0.000191843	1.89503e-05
	Alkyl Nitrates	1,2-Butanediol dinitrate;	0.00141284	NaN	/	CCC(CO[N+](=O)[O-])O[N+](=O)[O-]	not included	180.12	4	8	6	2	-1.5
	Alkyl Nitrates	2,3-Butanediol dinitrate	0.00109174	NaN	6423-45-6	CC(C(C)O[N+](=O)[O-])O[N+](=O)[O-]	not included	180.12	4	8	6	2	-1.5
	Alkyl Nitrates	2-Pentyl nitrate	0.000236697	NaN	21981-48-6	CCCC(C)O[N+](=O)[O-]	PEBNO3	133.15	5	11	3	1	-2
	Alkyl Nitrates	3-Pentyl nitrate	0.000231193	NaN	82944-59-0	CCC(CC)O[N+](=O)[O-]	PECNO3	133.15	5	11	3	1	-2
	Reference Value of ONO2 containing 5 carbon atoms		0.000233945	3.89233e-06
	Alkyl Nitrates	Cyclopentyl nitrate	8.26606e-05	NaN	21823-29-0	C1CCC(C1)O[N+](=O)[O-]	not included	131.13	5	9	3	1	-1.6
	Alkyl Nitrates	Ethyl nitrate	0.000154962	4.13992e-05	625-58-1	CCO[N+](=O)[O-]	C2H5NO3	91.066	2	5	3	1	-2
	Alkyl Nitrates	2-Hydroxyethyl nitrate; 2-Nitrooxy ethanol;	8.84404e-06	NaN	16051-48-2	C(CO[N+](=O)[O-])O	ETHOHNO3	107.07	2	5	4	1	-1

## Sheet: 5 Reference Value Table
	avg	1	2	3	4	5	6	7	8	9	10	11	12	13	14	15	16	17	18	19	20	21
	nC	RV_NitroBenzal	RV_NNO	RV_UNDICHO	RV_ONO	RV_COCO	RV_Dienedial	RV_COCOOH	RV_AroCHO	RV_OCHCHO	RV_NP	RV_COONO2	RV_CycloCO	RV_CHO	RV_AroNO2	RV_CO	RV_COOH	RV_UNCO	RV_UNCHO	RV_ONO2	RV_COOONO2	RV_COOOH
	1	NaN	NaN	NaN	0.187156	NaN	NaN	NaN	NaN	NaN	NaN	NaN	NaN	0.00854	NaN	0.000288	0.000558251	NaN	NaN	0.00011193	NaN	NaN
	2	NaN	0.374098	NaN	0.053578	0.0286089	NaN	NaN	NaN	0.0145342	NaN	0.00465	NaN	0.000584	NaN	0.000288	0.000558251	0.026422	NaN	0.000154962	8.53103e-05	8.5369e-05
	3	NaN	0.32	NaN	0.070367	0.0286089	NaN	0.0186	NaN	0.0138833	NaN	0.00399917	0.033945	0.00241	NaN	7.26e-05	0.000558251	0.000334439	0.000130037	0.000190129	0.000143119	8.5369e-05
	4	NaN	0.338	0.1345	0.0400917	0.0232179	NaN	0.0186	NaN	0.0142087	NaN	0.00448667	0.00241284	0.00188	NaN	0.000452	0.000558251	0.000334439	0.000522525	0.000191843	0.000114215	8.5369e-05
	5	NaN	0.325	0.116632	0.0547	0.034	NaN	0.0186	NaN	0.0142087	NaN	0.005455	0.00545	0.00165	NaN	0.000194	0.000558251	0.000334439	0.000326281	0.000233945	0.000114215	8.5369e-05
	6	NaN	0.327667	0.1255	0.0547	0.0286089	0.0237	0.0186	NaN	0.0142087	0.0147	0.00465	0.00241284	0.00221	0.00189	0.000433	0.000558251	0.000334439	0.000326281	0.00019272	0.000114215	8.5369e-05
	7	0.478591	0.327667	0.1255	0.0547	0.0286089	0.0237	0.0186	0.0180409	0.0142087	0.01095	0.00465	0.00241284	0.00104	0.00189	0.000288	0.000558251	0.000334439	0.000326281	0.00019272	0.000114215	8.5369e-05
	8	0.478591	0.327667	0.1255	0.0547	0.0286089	0.0237	0.0186	0.0182815	0.0142087	0.012825	0.00465	0.00241284	0.001838	0.00189	0.000288	0.000558251	0.000334439	0.000326281	0.00019272	0.000114215	8.5369e-05
	9	0.478591	0.327667	0.1255	0.0547	0.0286089	0.0237	0.0186	0.0181612	0.0142087	0.012825	0.00465	0.00241284	0.001838	0.00189	0.000288	0.000558251	0.000334439	0.000326281	0.00019272	0.000114215	8.5369e-05
	10~20	0.478591	0.327667	0.1255	0.0547	0.0286089	0.0237	0.0186	0.0181612	0.0142087	0.012825	0.00465	0.00241284	0.001838	0.00189	0.000288	0.000558251	0.000334439	0.000326281	0.00019272	0.000114215	8.5369e-05
	std	1	2	3	4	5	6	7	8	9	10	11	12	13	14	15	16	16	17	18	19	20
	nC	RV_NitroBenzal	RV_NNO	RV_UNDICHO	RV_ONO	RV_COCO	RV_Dienedial	RV_COCOOH	RV_AroCHO	RV_OCHCHO	RV_NP	RV_COONO2	RV_CycloCO	RV_CHO	RV_AroNO2	RV_CO	RV_COOH	RV_UNCO	RV_UNCHO	RV_ONO2	RV_COOONO2	RV_COOOH
	1	NaN	NaN	NaN	0.0324361	NaN	NaN	NaN	NaN	NaN	NaN	NaN	NaN	0.000486	NaN	0.000185347	1.36143e-05	NaN	NaN	7.7893e-06	NaN	NaN
	2	NaN	0.141958	NaN	NaN	0.00762411	NaN	NaN	NaN	0.00259158	NaN	NaN	NaN	0.000207	NaN	0.000185347	1.36143e-05	NaN	NaN	4.13992e-05	4.78523e-06	NaN
	3	NaN	NaN	NaN	NaN	0.00762411	NaN	0.016	NaN	0.00104797	NaN	0.000867	NaN	0.00231	NaN	2.23556e-05	1.36143e-05	0.000140722	3.36814e-07	3.66408e-05	NaN	NaN
	4	NaN	0.0109545	0.0324183	NaN	0.00589395	NaN	0.016	NaN	0.00046023	NaN	0.0022266	NaN	0.000113	NaN	3.25375e-05	1.36143e-05	0.000140722	0.000115513	1.89503e-05	4.08771e-05	NaN
	5	NaN	0.0212132	0.062826	0.0151676	NaN	NaN	0.016	NaN	0.00046023	NaN	0.00318905	NaN	4.27e-06	NaN	7.13594e-05	1.36143e-05	0.000140722	0.000277531	3.89233e-06	4.08771e-05	NaN
	6	NaN	0.00929157	0.0120208	0.0151676	0.00762411	0.00311127	0.016	NaN	0.00046023	NaN	0.000743034	NaN	5.72e-06	NaN	0.0004314	1.36143e-05	0.000140722	0.000277531	3.23144e-05	4.08771e-05	NaN
	7	0.275493	0.00929157	0.0120208	0.0151676	0.00762411	0.00311127	0.016	0.00791415	0.00046023	0.00162635	0.000743034	NaN	0.000166	NaN	0.000185347	1.36143e-05	0.000140722	0.000277531	3.23144e-05	4.08771e-05	NaN
	8	0.275493	0.00929157	0.0120208	0.0151676	0.00762411	0.00311127	0.016	NaN	0.00046023	0.00265165	0.000743034	NaN	0.000533732	NaN	0.000185347	1.36143e-05	0.000140722	0.000277531	3.23144e-05	4.08771e-05	NaN
	9	0.275493	0.00929157	0.0120208	0.0151676	0.00762411	0.00311127	0.016	0.000170166	0.00046023	0.00265165	0.000743034	NaN	0.000533732	NaN	0.000185347	1.36143e-05	0.000140722	0.000277531	3.23144e-05	4.08771e-05	NaN
	10~20	0.275493	0.00929157	0.0120208	0.0151676	0.00762411	0.00311127	0.016	0.000170166	0.00046023	0.00265165	0.000743034	NaN	0.000533732	NaN	0.000185347	1.36143e-05	0.000140722	0.000277531	3.23144e-05	4.08771e-05	NaN

## Sheet: 6 Prediction-MCM2327
No.	MCMnames	MolWeight	Product	MCM SMILES	InChI	j in MCM	Joverhead in MCM	Jrel(J/J4) in MCM	J_estimated_this study	J_std_estimated_this_study	Estimated_Joverhead, s-1 (when jNO2(sza=0) = 0.01094 s-1)
1	ACBUOAOOH	162.141	ACBUONEAO + OH+ ACBUONEAO + OH	OOC(CC(=O)C)OC(=O)C	InChI=1S/C6H10O5/c1-4(7)3-6(11-9)10-5(2)8/h6,9H,3H2,1-2H3	J41+J22	9.77e-06	0.00109528	0.00142425	0.000610244	1.55813e-05
2	ACBUONANO3	191.139	ACBUONEAO + NO2	CC(=O)CC(OC(=O)C)ON(=O)=O	InChI=1S/C6H9NO6/c1-4(8)3-6(12-5(2)9)13-7(10)11/h6H,3H2,1-2H3	J54	2.99e-06	0.000335198	0.005083	0.000859189	5.5608e-05
3	ACBUONAOH	146.141	ACEETOHO2 + CH3CO3	CC(=O)CC(O)OC(=O)C	InChI=1S/C6H10O4/c1-4(7)3-6(9)10-5(2)8/h6,9H,3H2,1-2H3	J22	3.98e-06	0.000446184	0.000866	0.000610092	9.47404e-06
4	ACBUONBOH	146.141	METACETHO + C2H5CO3 + HO2	CCC(=O)C(O)OC(=O)C	InChI=1S/C6H10O4/c1-3-5(8)6(9)10-4(2)7/h6,9H,3H2,1-2H3	J22	3.98e-06	0.000446184	0.000866	0.000610092	9.47404e-06
5	ACBUONBOOH	162.141	ACBUONEBO + OH+ METACETHO + C2H5CO3 + OH	OOC(OC(=O)C)C(=O)CC	InChI=1S/C6H10O5/c1-3-5(8)6(11-9)10-4(2)7/h6,9H,3H2,1-2H3	J41+J22	9.77e-06	0.00109528	0.00142425	0.000610244	1.55813e-05
6	ACCOCOC2H5	144.125	C2H5CO3 + CH3CO3	CCC(=O)C(=O)OC(=O)C	InChI=1S/C6H8O4/c1-3-5(8)6(9)10-4(2)7/h3H2,1-2H3	J22	3.98e-06	0.000446184	0.0290419	0.0076363	0.000317719
7	ACCOCOEOOH	176.124	ACCOCOETO + OH+ ACCOCOETO + OH	OOC(C)C(=O)C(=O)OC(=O)C	InChI=1S/C6H8O6/c1-3(12-10)5(8)6(9)11-4(2)7/h3,10H,1-2H3	J41+J22	9.77e-06	0.00109528	0.0296002	0.00763631	0.000323826
8	ACCOCOMOOH	162.097	ACCOCOMEO + OH+ CH3CO3 + HCHO + CO + OH	OOCC(=O)C(=O)OC(=O)C	InChI=1S/C5H6O6/c1-3(6)11-5(8)4(7)2-10-9/h9H,2H2,1H3	J41+J22	9.77e-06	0.00109528	0.0347523	0.0340001	0.00038019
9	ACCOETOOH	148.114	ACCOETO + OH	CC(=O)OC(=O)CCOO	InChI=1S/C5H8O5/c1-4(6)10-5(7)2-3-9-8/h8H,2-3H2,1H3	J41	5.79e-06	0.000649096	0.000946251	0.000101832	1.0352e-05
10	ACCOMECHO	130.099	MECOACETO2 + HO2 + CO	O=CCC(=O)OC(=O)C	InChI=1S/C5H6O4/c1-4(7)9-5(8)2-3-6/h3H,2H2,1H3	J15	1.99e-05	0.00223092	0.002038	0.000101008	2.22957e-05
11	ACCOMECO3H	162.097	MECOACETO2 + OH	CC(=O)OC(=O)CC(=O)OO	InChI=1S/C5H6O6/c1-3(6)10-4(7)2-5(8)11-9/h9H,2H2,1H3	J41	5.79e-06	0.000649096	0.000473369	0.000100917	5.17866e-06
12	ACCOPRONE	144.125	MECOACETO2 + CH3CO3	CC(=O)CC(=O)OC(=O)C	InChI=1S/C6H8O4/c1-4(7)3-6(9)10-5(2)8/h3H2,1-2H3	J22	3.98e-06	0.000446184	0.001299	0.000747207	1.42111e-05
13	ACCOPROOH	162.141	ACCOC3H6O + OH	CC(CC(=O)OC(=O)C)OO	InChI=1S/C6H10O5/c1-4(11-9)3-6(8)10-5(2)7/h4,9H,3H2,1-2H3	J41	5.79e-06	0.000649096	0.00142425	0.000610244	1.55813e-05
14	ACEBUTBONE	130.142	METHACETO2 + C2H5CO3	CCC(=O)COC(=O)C	InChI=1S/C6H10O3/c1-3-6(8)4-9-5(2)7/h3-4H2,1-2H3	J22	3.98e-06	0.000446184	0.000866	0.000610092	9.47404e-06
15	ACEBUTONE	130.142	ACETC2H4O2 + CH3CO3	CC(=O)CCOC(=O)C	InChI=1S/C6H10O3/c1-5(7)3-4-9-6(2)8/h3-4H2,1-2H3	J22	3.98e-06	0.000446184	0.000866	0.000610092	9.47404e-06
16	ACEC2CHO	116.115	ACETC2H4O2 + HO2 + CO	O=CCCOC(=O)C	InChI=1S/C5H8O3/c1-5(7)8-4-2-3-6/h3H,2,4H2,1H3	J15	1.99e-05	0.00223092	0.001844	7.1487e-05	2.01734e-05
17	ACEC2H4NO3	149.102	ACETC2H4O + NO2	CC(=O)OCCON(=O)=O	InChI=1S/C4H7NO5/c1-4(6)9-2-3-10-5(7)8/h2-3H2,1H3	J53	1.79e-06	0.000200671	0.00448667	0.0022266	4.90841e-05
18	ACEC2H4OOH	120.104	ACETC2H4O + OH	CC(=O)OCCOO	InChI=1S/C4H8O4/c1-4(5)7-2-3-8-6/h6H,2-3H2,1H3	J41	5.79e-06	0.000649096	0.00101025	3.52709e-05	1.10521e-05
19	ACECOCOCH3	130.099	CH3CO3 + CH3CO3	CC(=O)OC(=O)C(=O)C	InChI=1S/C5H6O4/c1-3(6)5(8)9-4(2)7/h1-2H3	J22	3.98e-06	0.000446184	0.034194	0.0340001	0.000374082
20	ACEETOHOOH	136.103	ACEETOHO + OH	CC(=O)OC(O)COO	InChI=1S/C4H8O5/c1-3(5)9-4(6)2-8-7/h4,6-7H,2H2,1H3	J41	5.79e-06	0.000649096	0.00098954	3.52709e-05	1.08256e-05
21	ACEPROPONE	116.115	METHACETO2 + CH3CO3	CC(=O)OCC(=O)C	InChI=1S/C5H8O3/c1-4(6)3-8-5(2)7/h3H2,1-2H3	J22	3.98e-06	0.000446184	0.000388	0.000100917	4.24472e-06
22	ACETC2CO3H	148.114	ACETC2H4O2 + OH	OOC(=O)CCOC(=O)C	InChI=1S/C5H8O5/c1-4(6)9-3-2-5(7)10-8/h8H,2-3H2,1H3	J41	5.79e-06	0.000649096	0.000279369	7.13594e-05	3.0563e-06
23	ACETETCHO	102.089	HO2 + CO + METHACETO2	O=CCOC(=O)C	InChI=1S/C4H6O3/c1-4(6)7-3-2-5/h2H,3H2,1H3	J15	1.99e-05	0.00223092	0.002332	0.000117591	2.55121e-05
24	ACETMECO3H	134.087	METHACETO2 + OH	CC(=O)OCC(=O)OO	InChI=1S/C4H6O5/c1-3(5)8-2-4(6)9-7/h7H,2H2,1H3	J41	5.79e-06	0.000649096	0.000537369	3.25375e-05	5.87882e-06
25	ACETOL	74.0785	CH3CO3 + HCHO + HO2	CC(=O)CO	InChI=1S/C3H6O2/c1-3(5)2-4/h4H,2H2,1H3	J22	3.98e-06	0.000446184	7.26e-05	2.23556e-05	7.94244e-07
26	ACO3H	88.0621	HO2 + CO + HCHO + OH	OOC(=O)C=C	InChI=1S/C3H4O3/c1-2-3(4)6-5/h2,5H,1H2	J41	5.79e-06	0.000649096	8.5369e-05	NaN	9.33937e-07
27	ACOMCOMOOH	176.124	ACCOMCOMO + OH+ ACCOMCOMO + OH	OOCC(=O)CC(=O)OC(=O)C	InChI=1S/C6H8O6/c1-4(7)12-6(9)2-5(8)3-11-10/h10H,2-3H2,1H3	J41+J22	9.77e-06	0.00109528	0.00185725	0.000747331	2.03183e-05
28	ACPRONEOOH	148.114	ACPRONEO + OH	OOC(OC(=O)C)C(=O)C	InChI=1S/C5H8O5/c1-3(6)5(10-8)9-4(2)7/h5,8H,1-2H3	J41	5.79e-06	0.000649096	0.000946251	0.000101832	1.0352e-05
29	ACR	56.0633	ACO3+ C2H4 + CO+ HCHO + HO2 + CO	C=CC=O	InChI=1S/C3H4O/c1-2-3-4/h2-3H,1H2	0.3.*J18+0.4.*J18+0.3.*J18	1.1e-06	0.000123317	0.000130037	3.36814e-07	1.4226e-06
30	ALC4DOLOOH	150.13	CHOC3DIOL + HO2 + CO + OH+ CHOC4DOLO + OH	OCC(O)CC(OO)C=O	InChI=1S/C5H10O5/c6-2-4(8)1-5(3-7)10-9/h3-6,8-9H,1-2H2	J17+J41	6.079e-05	0.00681495	0.00218754	1.42682e-05	2.39317e-05
31	ALCOCH2OOH	104.061	CHOCOCH2O + OH+ CHOCOCH2O + OH	OOCC(=O)C=O	InChI=1S/C3H4O4/c4-1-3(5)2-7-6/h1,6H,2H2	J41+J34	0.00013079	0.0146624	0.0144416	0.00104806	0.000157991
32	ALCOMOXOOH	120.061	CHOCOMOXO + OH	OOCOC(=O)C=O	InChI=1S/C3H4O5/c4-1-3(5)7-2-8-6/h1,6H,2H2	J41	5.79e-06	0.000649096	0.0144416	0.00104806	0.000157991
33	APINAOOH	186.248	APINAO + OH	OOC1(C)C(O)CC2CC1C2(C)C	InChI=1S/C10H18O3/c1-9(2)6-4-7(9)10(3,13-12)8(11)5-6/h6-8,11-12H,4-5H2,1-3H3	J41	5.79e-06	0.000649096	0.00053754	1.36143e-05	5.88069e-06
34	APINBOOH	186.248	APINBO + OH	OOC1CC2CC(C1(C)O)C2(C)C	InChI=1S/C10H18O3/c1-9(2)6-4-7(9)10(3,11)8(5-6)13-12/h6-8,11-12H,4-5H2,1-3H3	J41	5.79e-06	0.000649096	0.00053754	1.36143e-05	5.88069e-06
35	APINCNO3	215.246	APINCO + NO2	O=N(=O)OC(C)(C)C1CC=C(C)C(O)C1	InChI=1S/C10H17NO4/c1-7-4-5-8(6-9(7)12)10(2,3)15-11(13)14/h4,8-9,12H,5-6H2,1-3H3	J55	8.33e-06	0.000933847	6.8088e-05	3.23144e-05	7.44882e-07
36	APINCOOH	186.248	APINCO + OH	OOC(C)(C)C1CC=C(C)C(O)C1	InChI=1S/C10H18O3/c1-7-4-5-8(6-9(7)11)10(2,3)13-12/h4,8-9,11-12H,5-6H2,1-3H3	J41	5.79e-06	0.000649096	0.00053754	1.36143e-05	5.88069e-06
37	BCAL	236.35	C141O2 + CO + HO2	O=CCCC(=C)C1CC(C)(C)C1CCC(=O)C	InChI=1S/C15H24O2/c1-11(6-5-9-16)13-10-15(3,4)14(13)8-7-12(2)17/h9,13-14H,1,5-8,10H2,2-4H3	J15	1.99e-05	0.00223092	0.00217244	0.000551971	2.37665e-05
38	BCALACO	250.333	C126CO3 + CH3CO3	O=CCCC(=C)C1CC(C)(C)C1CC(=O)C(=O)C	InChI=1S/C15H22O3/c1-10(6-5-7-16)12-9-15(3,4)13(12)8-14(18)11(2)17/h7,12-13H,1,5-6,8-9H2,2-4H3	J35	0.000268	0.0300445	0.0289352	0.00847812	0.000316551
39	BCALAOH	252.349	C126CHO + CH3CO3 + HO2	O=CCCC(=C)C1CC(C)(C)C1CC(O)C(=O)C	InChI=1S/C15H24O3/c1-10(6-5-7-16)12-9-15(3,4)13(12)8-14(18)11(2)17/h7,12-14,18H,1,5-6,8-9H2,2-4H3	J22	3.98e-06	0.000446184	0.00217244	0.000551971	2.37665e-05
40	BCALAOOH	268.349	BCALAO + OH+ C126CHO + OH + CH3CO3	O=CCCC(=C)C1CC(C)(C)C1CC(OO)C(=O)C	InChI=1S/C15H24O4/c1-10(6-5-7-16)12-9-15(3,4)13(12)8-14(19-18)11(2)17/h7,12-14,18H,1,5-6,8-9H2,2-4H3	J41+J22	9.77e-06	0.00109528	0.00273069	0.000552139	2.98737e-05
41	BCALBCO	250.333	C136CO3 + CO + HO2	O=CCCC(=C)C1CC(C)(C)C1CCC(=O)C=O	InChI=1S/C15H22O3/c1-11(5-4-8-16)13-9-15(2,3)14(13)7-6-12(18)10-17/h8,10,13-14H,1,4-7,9H2,2-3H3	J34	0.000125	0.0140133	0.125826	0.012024	0.00137654
42	BCALBOH	252.349	C136CO3 + HCHO + HO2	O=CCCC(=C)C1CC(C)(C)C1CCC(=O)CO	InChI=1S/C15H24O3/c1-11(5-4-8-16)13-9-15(2,3)14(13)7-6-12(18)10-17/h8,13-14,17H,1,4-7,9-10H2,2-3H3	J22	3.98e-06	0.000446184	0.00217244	0.000551971	2.37665e-05
43	BCALBOOH	268.349	BCALBO + OH+ C136CO3 + HCHO + OH	O=CCCC(=C)C1CC(C)(C)C1CCC(=O)COO	InChI=1S/C15H24O4/c1-11(5-4-8-16)13-9-15(2,3)14(13)7-6-12(17)10-19-18/h8,13-14,18H,1,4-7,9-10H2,2-3H3	J41+J22	9.77e-06	0.00109528	0.00273069	0.000552139	2.98737e-05
44	BCALCCO	250.333	C144O2 + CO + HO2	O=CC(=O)CC(=C)C1CC(C)(C)C1CCC(=O)C	InChI=1S/C15H22O3/c1-10(7-12(18)9-16)13-8-15(3,4)14(13)6-5-11(2)17/h9,13-14H,1,5-8H2,2-4H3	J34	0.000125	0.0140133	0.00246044	0.000582259	2.69172e-05
45	BCALCOH	252.349	C141CO + HO2 + CO + HO2	O=CC(O)CC(=C)C1CC(C)(C)C1CCC(=O)C	InChI=1S/C15H24O3/c1-10(7-12(18)9-16)13-8-15(3,4)14(13)6-5-11(2)17/h9,12-14,18H,1,5-8H2,2-4H3	J15	1.99e-05	0.00223092	0.00217244	0.000551971	2.37665e-05
46	BCALCOOH	268.349	BCALCO + OH+ C141CO + OH + CO + HO2	OOC(C=O)CC(=C)C1CC(C)(C)C1CCC(=O)C	InChI=1S/C15H24O4/c1-10(7-12(9-16)19-18)13-8-15(3,4)14(13)6-5-11(2)17/h9,12-14,18H,1,5-8H2,2-4H3	J41+J15	2.569e-05	0.00288002	0.00273069	0.000552139	2.98737e-05
47	BCALOOH	286.364	BCALO + OH	O=CCCC(CO)(OO)C1CC(C)(C)C1CCC(=O)C	InChI=1S/C15H26O5/c1-11(18)5-6-12-13(9-14(12,2)3)15(10-17,20-19)7-4-8-16/h8,12-13,17,19H,4-7,9-10H2,1-3H3	J41	5.79e-06	0.000649096	0.00266354	0.000565163	2.91391e-05
48	BCAOOH	254.365	BCAO + OH	OOC1(C)CCC2C(CC2(C)C)C(=C)CCC1O	InChI=1S/C15H26O3/c1-10-5-6-13(16)15(4,18-17)8-7-12-11(10)9-14(12,2)3/h11-13,16-17H,1,5-9H2,2-4H3	J41	5.79e-06	0.000649096	0.00053754	1.36143e-05	5.88069e-06
49	BCBOOH	254.365	BCBO + OH	OOC1CCC(=C)C2CC(C)(C)C2CCC1(C)O	InChI=1S/C15H26O3/c1-10-5-6-13(18-17)15(4,16)8-7-12-11(10)9-14(12,2)3/h11-13,16-17H,1,5-9H2,2-4H3	J41	5.79e-06	0.000649096	0.00053754	1.36143e-05	5.88069e-06
50	BCCOOH	254.365	BCCO + OH	OCC1(OO)CC\C=C(\C)/CCC2C1CC2(C)C	InChI=1S/C15H26O3/c1-11-5-4-8-15(10-16,18-17)13-9-14(2,3)12(13)7-6-11/h5,12-13,16-17H,4,6-10H2,1-3H3/b11-5-	J41	5.79e-06	0.000649096	0.00053754	1.36143e-05	5.88069e-06
51	BCKAOOH	256.338	BCKAO + OH	OOC1(C)CCC2C(CC2(C)C)C(=O)CCC1O	InChI=1S/C14H24O4/c1-13(2)8-9-10(13)6-7-14(3,18-17)12(16)5-4-11(9)15/h9-10,12,16-17H,4-8H2,1-3H3	J41	5.79e-06	0.000649096	0.00082554	0.000185846	9.03141e-06
52	BCKBOOH	256.338	BCKBO + OH	OOC1CCC(=O)C2CC(C)(C)C2CCC1(C)O	InChI=1S/C14H24O4/c1-13(2)8-9-10(13)6-7-14(3,16)12(18-17)5-4-11(9)15/h9-10,12,16-17H,4-8H2,1-3H3	J41	5.79e-06	0.000649096	0.00082554	0.000185846	9.03141e-06
53	BCLKACO	252.306	C116CO3 + CH3CO3	O=CCCC(=O)C1CC(C)(C)C1CC(=O)C(=O)C	InChI=1S/C14H20O4/c1-9(16)13(18)7-11-10(8-14(11,2)3)12(17)5-4-6-15/h6,10-11H,4-5,7-8H2,1-3H3	J35	0.000268	0.0300445	0.0307349	0.0084924	0.00033624
54	BCLKAOH	254.322	C116CHO + CH3CO3 + HO2	O=CCCC(=O)C1CC(C)(C)C1CC(O)C(=O)C	InChI=1S/C14H22O4/c1-9(16)13(18)7-11-10(8-14(11,2)3)12(17)5-4-6-15/h6,10-11,13,18H,4-5,7-8H2,1-3H3	J22	3.98e-06	0.000446184	0.002414	0.000594623	2.64092e-05
55	BCLKAOOH	270.322	BCLKAO + OH+ C116CHO + OH + CH3CO3	O=CCCC(=O)C1CC(C)(C)C1CC(OO)C(=O)C	InChI=1S/C14H22O5/c1-9(16)13(19-18)7-11-10(8-14(11,2)3)12(17)5-4-6-15/h6,10-11,13,18H,4-5,7-8H2,1-3H3	J41+J22	9.77e-06	0.00109528	0.00297225	0.000594779	3.25164e-05
56	BCLKBCO	252.306	C1210CO3 + CO + HO2	O=CCCC(=O)C1CC(C)(C)C1CCC(=O)C=O	InChI=1S/C14H20O4/c1-14(2)8-11(13(18)4-3-7-15)12(14)6-5-10(17)9-16/h7,9,11-12H,3-6,8H2,1-2H3	J34	0.000125	0.0140133	0.0163347	0.000728721	0.000178702
57	BCLKBOH	254.322	C1210CO3 + HCHO + HO2	O=CCCC(=O)C1CC(C)(C)C1CCC(=O)CO	InChI=1S/C14H22O4/c1-14(2)8-11(13(18)4-3-7-15)12(14)6-5-10(17)9-16/h7,11-12,16H,3-6,8-9H2,1-2H3	J22	3.98e-06	0.000446184	0.002414	0.000594623	2.64092e-05
58	BCLKBOOH	270.322	BCLKBO + OH+ C1210CO3 + HCHO + OH	O=CCCC(=O)C1CC(C)(C)C1CCC(=O)COO	InChI=1S/C14H22O5/c1-14(2)8-11(13(17)4-3-7-15)12(14)6-5-10(16)9-19-18/h7,11-12,18H,3-6,8-9H2,1-2H3	J41+J22	9.77e-06	0.00109528	0.00297225	0.000594779	3.25164e-05
59	BCLKCCO	252.306	C132O2 + CO + HO2	O=CC(=O)CC(=O)C1CC(C)(C)C1CCC(=O)C	InChI=1S/C14H20O4/c1-9(16)4-5-12-11(7-14(12,2)3)13(18)6-10(17)8-15/h8,11-12H,4-7H2,1-3H3	J34	0.000125	0.0140133	0.002702	0.000622841	2.95599e-05
60	BCLKCOH	254.322	C131CO + HO2 + CO + HO2	O=CC(O)CC(=O)C1CC(C)(C)C1CCC(=O)C	InChI=1S/C14H22O4/c1-9(16)4-5-12-11(7-14(12,2)3)13(18)6-10(17)8-15/h8,10-12,17H,4-7H2,1-3H3	J15	1.99e-05	0.00223092	0.002414	0.000594623	2.64092e-05
61	BCLKCOOH	270.322	BCLKCO + OH+ C131CO + OH + CO + HO2	OOC(C=O)CC(=O)C1CC(C)(C)C1CCC(=O)C	InChI=1S/C14H22O5/c1-9(16)4-5-12-11(7-14(12,2)3)13(17)6-10(8-15)19-18/h8,10-12,18H,4-7H2,1-3H3	J41+J15	2.569e-05	0.00288002	0.00297225	0.000594779	3.25164e-05
62	BCLKET	238.323	C131O2 + CO + HO2	O=CCCC(=O)C1CC(C)(C)C1CCC(=O)C	InChI=1S/C14H22O3/c1-10(16)6-7-12-11(9-14(12,2)3)13(17)5-4-8-15/h8,11-12H,4-7,9H2,1-3H3	J15	1.99e-05	0.00223092	0.002414	0.000594623	2.64092e-05
63	BCSOZOOH	302.363	BCSOZO + OH	OCC1(OO)CCC2OOC(C)(CCC3C1CC3(C)C)O2	InChI=1S/C15H26O6/c1-13(2)8-11-10(13)4-6-14(3)18-12(19-21-14)5-7-15(11,9-16)20-17/h10-12,16-17H,4-9H2,1-3H3	J41	5.79e-06	0.000649096	0.00053754	1.36143e-05	5.88069e-06
64	BENZAL	106.122	HO2 + C6H5CO3+ HO2 + CO + C6H5O2	O=Cc1ccccc1	InChI=1S/C7H6O/c8-6-7-4-2-1-3-5-7/h1-6H	J19+J18	2.2e-06	0.000246634	0.0180409	0.0135615	0.000197367
65	BIACET	86.0892	CH3CO3 + CH3CO3	CC(=O)C(=O)C	InChI=1S/C4H6O2/c1-3(5)4(2)6/h1-2H3	J35	0.000268	0.0300445	0.0232179	0.0232179	0.000254004
66	BIACETOH	102.089	CH3CO3 + HOCH2CO3	CC(=O)C(=O)CO	InChI=1S/C4H6O3/c1-3(6)4(7)2-5/h5H,2H2,1H3	J35	0.000268	0.0300445	0.0232179	0.0232179	0.000254004
67	BIACETOOH	118.088	BIACETO + OH+ BIACETO + OH	CC(=O)C(=O)COO	InChI=1S/C4H6O4/c1-3(5)4(6)2-8-7/h7H,2H2,1H3	J41+J35	0.00027379	0.0306936	0.0237761	0.0232179	0.000260111
68	BOCOCH2OOH	148.157	TBOCOCH2O + OH	OOCC(=O)OC(C)(C)C	InChI=1S/C6H12O4/c1-6(2,3)10-5(7)4-9-8/h8H,4H2,1-3H3	J41	5.79e-06	0.000649096	0.000991251	0.000431615	1.08443e-05
69	BOX2COMOOH	176.167	BOXCOCOMO + OH	CCCC(OO)OC(=O)C(=O)C	InChI=1S/C7H12O5/c1-3-4-6(12-10)11-7(9)5(2)8/h6,10H,3-4H2,1-2H3	J41	5.79e-06	0.000649096	0.0291672	0.00762412	0.000319089
70	BOX2ECHO	116.158	HO2 + CO + BOX2MO2	CCCCOCC=O	InChI=1S/C6H12O2/c1-2-3-5-8-6-4-7/h4H,2-3,5-6H2,1H3	J15	1.99e-05	0.00223092	0.00221	5.72e-06	2.41774e-05
71	BOX2OHAOOH	150.173	BOX2EOHAO + OH	CCCC(OO)OCCO	InChI=1S/C6H14O4/c1-2-3-6(10-8)9-5-4-7/h6-8H,2-5H2,1H3	J41	5.79e-06	0.000649096	0.00053754	1.36143e-05	5.88069e-06
72	BOX2OHBOOH	150.173	BOX2EOHBO + OH	CCCCOC(CO)OO	InChI=1S/C6H14O4/c1-2-3-4-9-6(5-7)10-8/h6-8H,2-5H2,1H3	J41	5.79e-06	0.000649096	0.00053754	1.36143e-05	5.88069e-06
73	BOXCOALOOH	162.141	BOXCOCHOO + OH	CCCC(OC(=O)C=O)OO	InChI=1S/C6H10O5/c1-2-3-6(11-9)10-5(8)4-7/h4,6,9H,2-3H2,1H3	J41	5.79e-06	0.000649096	0.002643	0.000431438	2.89144e-05
74	BOXCOCHO	130.142	HO2 + CO + NC4H9O2	CCCCOC(=O)C=O	InChI=1S/C6H10O3/c1-2-3-4-9-6(8)5-7/h5H,2-4H2,1H3	J34	0.000125	0.0140133	0.0142087	0.00046023	0.000155444
75	BOXCOOLOOH	178.183	BOXCOEOLO + OH	CCCC(OO)OC(=O)C(C)O	InChI=1S/C7H14O5/c1-3-4-6(12-10)11-7(9)5(2)8/h5-6,8,10H,3-4H2,1-2H3	J41	5.79e-06	0.000649096	0.00082554	0.000185846	9.03141e-06
76	BOXEOHANO3	179.171	BOX2EOHAO + NO2	OCCOC(CCC)ON(=O)=O	InChI=1S/C6H13NO5/c1-2-3-6(11-5-4-8)12-7(9)10/h6,8H,2-5H2,1H3	J54	2.99e-06	0.000335198	0.00019272	3.23144e-05	2.10836e-06
77	BOXEOHBNO3	179.171	BOX2EOHBO + NO2	CCCCOC(CO)ON(=O)=O	InChI=1S/C6H13NO5/c1-2-3-4-11-6(5-8)12-7(9)10/h6,8H,2-5H2,1H3	J54	2.99e-06	0.000335198	1.09985e-05	3.23144e-05	1.20324e-07
78	BOXMCO3H	148.157	BOX2MO2 + OH	CCCCOCC(=O)OO	InChI=1S/C6H12O4/c1-2-3-4-9-5-6(7)10-8/h8H,2-5H2,1H3	J41	5.79e-06	0.000649096	8.5369e-05	NaN	9.33937e-07
79	BOXMOOH	120.147	BOX2MO + OH	CCCCOCOO	InChI=1S/C5H12O3/c1-2-3-4-7-5-8-6/h6H,2-5H2,1H3	J41	5.79e-06	0.000649096	0.000558251	1.36143e-05	6.10727e-06
80	BOXPOLANO3	193.198	BOXPROLAO + NO2	CCCC(OCC(C)O)ON(=O)=O	InChI=1S/C7H15NO5/c1-3-4-7(13-8(10)11)12-5-6(2)9/h6-7,9H,3-5H2,1-2H3	J54	2.99e-06	0.000335198	0.00019272	3.23144e-05	2.10836e-06
81	BOXPOLAOOH	164.2	BOXPROLAO + OH	CCCC(OO)OCC(C)O	InChI=1S/C7H16O4/c1-3-4-7(11-9)10-5-6(2)8/h6-9H,3-5H2,1-2H3	J41	5.79e-06	0.000649096	0.00053754	1.36143e-05	5.88069e-06
82	BOXPOLBOOH	164.2	BOXPROLBO + OH	CCCCOC(OO)C(C)O	InChI=1S/C7H16O4/c1-3-4-5-10-7(11-9)6(2)8/h6-9H,3-5H2,1-2H3	J41	5.79e-06	0.000649096	0.00053754	1.36143e-05	5.88069e-06
83	BOXPROANO3	191.182	BOXPRONEAO + NO2+ BOXPRONEAO + NO2	CCCC(OCC(=O)C)ON(=O)=O	InChI=1S/C7H13NO5/c1-3-4-7(13-8(10)11)12-5-6(2)9/h7H,3-5H2,1-2H3	J54+J22	6.97e-06	0.000781382	0.00465	0.000743034	5.0871e-05
84	BOXPROBOOH	162.184	BOXCHO + CH3CO3 + OH+ BOXPRONBO + OH	CCCCOC(OO)C(=O)C	InChI=1S/C7H14O4/c1-3-4-5-10-7(11-9)6(2)8/h7,9H,3-5H2,1-2H3	J22+J41	9.77e-06	0.00109528	0.000846251	0.000185846	9.25799e-06
85	BOXPRONBOH	146.184	BOXCHO + CH3CO3 + HO2	CCCCOC(O)C(=O)C	InChI=1S/C7H14O3/c1-3-4-5-10-7(9)6(2)8/h7,9H,3-5H2,1-2H3	J22	3.98e-06	0.000446184	0.000288	0.000185347	3.15072e-06
86	BOXPRONE	130.185	CH3CO3 + BOX2MO2	CCCCOCC(=O)C	InChI=1S/C7H14O2/c1-3-4-5-9-6-7(2)8/h3-6H2,1-2H3	J22	3.98e-06	0.000446184	0.000288	0.000185347	3.15072e-06
87	BOXPROOOH	162.184	BOXPRONEAO + OH+ BOXPRONEAO + OH	CCCC(OO)OCC(=O)C	InChI=1S/C7H14O4/c1-3-4-7(11-9)10-5-6(2)8/h7,9H,3-5H2,1-2H3	J41+J22.*2	1.375e-05	0.00154146	0.000846251	0.000185846	9.25799e-06
88	BPINAOOH	186.248	BPINAO + OH	OCC1(OO)CCC2CC1C2(C)C	InChI=1S/C10H18O3/c1-9(2)7-3-4-10(6-11,13-12)8(9)5-7/h7-8,11-12H,3-6H2,1-2H3	J41	5.79e-06	0.000649096	0.00053754	1.36143e-05	5.88069e-06
89	BPINBOOH	186.248	BPINBO + OH	OOCC1(O)CCC2CC1C2(C)C	InChI=1S/C10H18O3/c1-9(2)7-3-4-10(11,6-13-12)8(9)5-7/h7-8,11-12H,3-6H2,1-2H3	J41	5.79e-06	0.000649096	0.00053754	1.36143e-05	5.88069e-06
90	BPINCNO3	215.246	BPINCO + NO2	OCC1=CCC(CC1)C(C)(C)ON(=O)=O	InChI=1S/C10H17NO4/c1-10(2,15-11(13)14)9-5-3-8(7-12)4-6-9/h3,9,12H,4-7H2,1-2H3	J55	8.33e-06	0.000933847	6.8088e-05	3.23144e-05	7.44882e-07
91	BPINCOOH	186.248	BPINCO + OH	OCC1=CCC(CC1)C(C)(C)OO	InChI=1S/C10H18O3/c1-10(2,13-12)9-5-3-8(7-11)4-6-9/h3,9,11-12H,4-7H2,1-2H3	J41	5.79e-06	0.000649096	0.00053754	1.36143e-05	5.88069e-06
92	BRETAL	122.949	CH2BRO2 + HO2 + CO	BrCC=O	InChI=1S/C2H3BrO/c3-1-2-4/h2H,1H2	J11	3.26e-05	0.00365467	0.000584	0.000207	6.38896e-06
93	BRETO3H	154.947	CH2BRO2 + OH	OOC(=O)CBr	InChI=1S/C2H3BrO3/c3-1-2(4)6-5/h5H,1H2	J41	5.79e-06	0.000649096	8.5369e-05	NaN	9.33937e-07
94	BU1ENO3OOH	151.118	BU1ENO3O + OH	CCC(OO)CON(=O)=O	InChI=1S/C4H9NO5/c1-2-4(10-8)3-9-5(6)7/h4,8H,2-3H2,1H3	J41	5.79e-06	0.000649096	0.000750094	2.33337e-05	8.20603e-06
95	BUFORMOOH	134.131	BUFORMO + OH	CCCC(OO)OC=O	InChI=1S/C5H10O4/c1-2-3-5(9-7)8-4-6/h4-5,7H,2-3H2,1H3	J41	5.79e-06	0.000649096	0.000558251	1.36143e-05	6.10727e-06
96	BUT2CHO	86.1323	CH3CHO + C3H6+ SC4H9O2 + HO2 + CO	CC(CC)C=O	InChI=1S/C5H10O/c1-3-5(2)4-6/h4-5H,3H2,1-2H3	J16+J17	6.69e-05	0.00749992	0.00165	4.27e-06	1.8051e-05
97	BUT2CO3H	118.131	SC4H9O2 + OH	CC(CC)C(=O)OO	InChI=1S/C5H10O3/c1-3-4(2)5(6)8-7/h4,7H,3H2,1-2H3	J41	5.79e-06	0.000649096	8.5369e-05	NaN	9.33937e-07
98	BUT2OLO	88.1051	CH3CO3 + CH3CHO + HO2	CC(=O)C(C)O	InChI=1S/C4H8O2/c1-3(5)4(2)6/h3,5H,1-2H3	J22	3.98e-06	0.000446184	0.000452	3.25375e-05	4.94488e-06
99	BUT2OLOOH	106.12	BUT2OLAO + OH	OOC(C)C(C)O	InChI=1S/C4H10O3/c1-3(5)4(2)7-6/h3-6H,1-2H3	J41	5.79e-06	0.000649096	0.00053754	1.36143e-05	5.88069e-06
100	BUTAL2NO3	133.103	BUTAL2O + NO2+ C2H5CHO + HO2 + CO + NO2	CCC(C=O)ON(=O)=O	InChI=1S/C4H7NO4/c1-2-4(3-6)9-5(7)8/h3-4H,2H2,1H3	J54+J17	5.799e-05	0.00650105	0.0144816	0.00400026	0.000158429
101	BUTALAOOH	104.105	BUTAL2O + OH	CCC(OO)C=O	InChI=1S/C4H8O3/c1-2-4(3-5)7-6/h3-4,6H,2H2,1H3	J41	5.79e-06	0.000649096	0.00243825	0.000113817	2.66745e-05
102	BUTALNO3	133.103	NO2 + BUTALO+ NO2 + BUTALO	O=CCC(C)ON(=O)=O	InChI=1S/C4H7NO4/c1-4(2-3-6)9-5(7)8/h3-4H,2H2,1H3	J54+J15	2.289e-05	0.00256612	0.0144816	0.00400026	0.000158429
103	BUTALO2H	104.105	BUTALO + OH+ HO2 + CO + IC3H7O2	CC(CC=O)OO	InChI=1S/C4H8O3/c1-4(7-6)2-3-5/h3-4,6H,2H2,1H3	J41+J15	2.569e-05	0.00288002	0.00188	0.000113	2.05672e-05
104	BUTDANO3	133.103	BUTDAO + NO2	OCC=CCON(=O)=O	InChI=1S/C4H7NO4/c6-3-1-2-4-9-5(7)8/h1-2,6H,3-4H2	J53	1.79e-06	0.000200671	0.000191843	1.89503e-05	2.09876e-06
105	BUTDAOOH	104.105	BUTDAO + OH	OOCC=CCO	InChI=1S/C4H8O3/c5-3-1-2-4-7-6/h1-2,5-6H,3-4H2	J41	5.79e-06	0.000649096	0.00053754	1.36143e-05	5.88069e-06
106	BUTDBOOH	104.105	BUTDBO + OH	OCC(OO)C=C	InChI=1S/C4H8O3/c1-2-4(3-5)7-6/h2,4-6H,1,3H2	J41	5.79e-06	0.000649096	0.00053754	1.36143e-05	5.88069e-06
107	BUTDCOOH	104.105	BUTDCO + OH	OC(COO)C=C	InChI=1S/C4H8O3/c1-2-4(5)3-7-6/h2,4-6H,1,3H2	J41	5.79e-06	0.000649096	0.00053754	1.36143e-05	5.88069e-06
108	BUTONENO3	133.103	MEKBO + NO2	O=N(=O)OC(C)C(=O)C	InChI=1S/C4H7NO4/c1-3(6)4(2)9-5(7)8/h4H,1-2H3	J56.*1.6	5.056e-05	0.0056681	0.00448667	0.0022266	4.90841e-05
109	BZBIPERNO3	189.123	BZBIPERO + NO2	O=N(=O)OC1C=CC2OOC1C2O	InChI=1S/C6H7NO6/c8-5-3-1-2-4(11-7(9)10)6(5)13-12-3/h1-6,8H	J54	2.99e-06	0.000335198	0.000605628	3.50652e-05	6.62557e-06
110	BZBIPEROOH	160.125	BZBIPERO + OH	OOC1C=CC2OOC1C2O	InChI=1S/C6H8O5/c7-5-3-1-2-4(9-8)6(5)11-10-3/h1-8H	J41	5.79e-06	0.000649096	0.00107508	1.92535e-05	1.17614e-05
111	BZEMUCCO	158.109	HCOCOHCO3 + C3DIALO2+ HCOCOHCO3 + C3DIALO2	O=CC1OC1C(=O)C(O)C=O	InChI=1S/C6H6O5/c7-1-3(9)5(10)6-4(2-8)11-6/h1-4,6,9H	J15.*2+J22	4.378e-05	0.00490802	0.004853	0.000431476	5.30918e-05
112	BZEMUCCO2H	142.109	C5DIALO2 + HO2+ C5DIALO2 + HO2	O=CC=CC1OC1C(=O)O	InChI=1S/C6H6O4/c7-3-1-2-4-5(10-4)6(8)9/h1-5H,(H,8,9)	J18+J19	2.2e-06	0.000246634	0.000326281	0.000277531	3.56951e-06
113	BZEMUCCO3H	158.109	C5DIALO2 + OH+ C5DIALO2 + OH+ C5DIALO2 + OH	OOC(=O)C1OC1C=CC=O	InChI=1S/C6H6O5/c7-3-1-2-4-5(10-4)6(8)11-9/h1-5,9H	J41+J18+J19	7.99e-06	0.000895731	0.00041165	0.000277531	4.50345e-06
114	BZEMUCNO3	205.122	EPXC4DIAL + NO2 + GLYOX + HO2	O=CC1OC1C(ON(=O)=O)C(O)C=O	InChI=1S/C6H7NO7/c8-1-3(10)5(14-7(11)12)6-4(2-9)13-6/h1-6,10H	J17	5.5e-05	0.00616586	0.0086953	0.00133493	9.51266e-05
115	BZEMUCOH	160.125	BZEMUCO + HO2	O=CC(O)C(O)C1OC1C=O	InChI=1S/C6H8O5/c7-1-3(9)5(10)6-4(2-8)11-6/h1-6,9-10H	J15.*2	3.98e-05	0.00446184	0.00442	8.0893e-06	4.83548e-05
116	BZEMUCOOH	176.124	BZEMUCO + OH+ BZEMUCO + OH	O=CC(O)C(OO)C1OC1C=O	InChI=1S/C6H8O6/c7-1-3(9)5(12-10)6-4(2-8)11-6/h1-6,9-10H	J41+J15.*2	4.559e-05	0.00511093	0.00495754	1.58362e-05	5.42355e-05
117	BZEPOXMUC	126.11	C5DIALO2 + HO2 + CO+ MALDIAL + HO2 + CO + HO2 + CO	O=CC=CC1OC1C=O	InChI=1S/C6H6O3/c7-3-1-2-5-6(4-8)9-5/h1-6H	J4.*0.1.*0.5+J4.*0.1.*0.5	0.000892	0.099999	0.1255	0.0120208	0.00137297
118	BZFUOOH	134.087	BZFUO + OH	OOC1C(O)COC1=O	InChI=1S/C4H6O5/c5-2-1-8-4(6)3(2)9-7/h2-3,5,7H,1H2	J41	5.79e-06	0.000649096	0.00098954	3.52709e-05	1.08256e-05
119	BZOBIPEROH	142.109	MALDIALCO3 + GLYOX + HO2	O=C1C=CC2OOC1C2O	InChI=1S/C6H6O4/c7-3-1-2-4-5(8)6(3)10-9-4/h1-2,4-6,8H	J22	3.98e-06	0.000446184	0.000871979	0.000141379	9.53945e-06
120	C1010NO3	229.23	C1010O + NO2	O=CCCC(=C)C(=O)CC(C)(C)O[N+](=O)[O-]	InChI=1S/C10H15NO5/c1-8(5-4-6-12)9(13)7-10(2,3)16-11(14)15/h6H,1,4-5,7H2,2-3H3	J55	8.33e-06	0.000933847	0.00497628	0.000793173	5.44405e-05
121	C1010OOH	200.232	C1010O + OH	O=CCCC(=C)C(=O)CC(C)(C)OO	InChI=1S/C10H16O4/c1-8(5-4-6-11)9(12)7-10(2,3)14-13/h6,13H,1,4-5,7H2,2-3H3	J41	5.79e-06	0.000649096	0.00273069	0.000552139	2.98737e-05
122	C1011CO3H	214.258	C1011O2 + OH	OOC(=O)C1CC(C)(C)C1CCC(=O)C	InChI=1S/C11H18O4/c1-7(12)4-5-9-8(10(13)15-14)6-11(9,2)3/h8-9,14H,4-6H2,1-3H3	J41	5.79e-06	0.000649096	0.000373369	0.000185347	4.08466e-06
123	C1011NO3	215.246	C1011O + NO2	CC(=O)CCC1C(O[N+](=O)[O-])CC1(C)C	InChI=1S/C10H17NO4/c1-7(12)4-5-8-9(15-11(13)14)6-10(8,2)3/h8-9H,4-6H2,1-3H3	J54	2.99e-06	0.000335198	0.00200926	0.000743034	2.19814e-05
124	C1011OOH	186.248	C1011O + OH	OOC1CC(C)(C)C1CCC(=O)C	InChI=1S/C10H18O3/c1-7(11)4-5-8-9(13-12)6-10(8,2)3/h8-9,12H,4-6H2,1-3H3	J41	5.79e-06	0.000649096	0.000846251	0.000185846	9.25799e-06
125	C1012NO3	231.246	C1012O + NO2	O=CCC(C)(C)C(CCC(=O)C)O[N+](=O)[O-]	InChI=1S/C10H17NO5/c1-8(13)4-5-9(16-11(14)15)10(2,3)6-7-12/h7,9H,4-6H2,1-3H3	J54	2.99e-06	0.000335198	0.006488	0.00091486	7.09787e-05
126	C1012OOH	202.248	C1012O + OH	O=CCC(C)(C)C(OO)CCC(=O)C	InChI=1S/C10H18O4/c1-8(12)4-5-9(14-13)10(2,3)6-7-11/h7,9,13H,4-6H2,1-3H3	J41	5.79e-06	0.000649096	0.00268425	0.000565163	2.93657e-05
127	C1013CO3H	230.258	C1013O2 + OH	COC(=O)CCC1C(CC1(C)C)C(=O)OO	InChI=1S/C11H18O5/c1-11(2)6-7(10(13)16-14)8(11)4-5-9(12)15-3/h7-8,14H,4-6H2,1-3H3	J41	5.79e-06	0.000649096	0.000373369	0.000185347	4.08466e-06
128	C1013NO3	231.246	C1013O + NO2	COC(=O)CCC1C(O[N+](=O)[O-])CC1(C)C	InChI=1S/C10H17NO5/c1-10(2)6-8(16-11(13)14)7(10)4-5-9(12)15-3/h7-8H,4-6H2,1-3H3	J54	2.99e-06	0.000335198	0.00200926	0.000743034	2.19814e-05
129	C1013OOH	202.248	C1013O + OH	COC(=O)CCC1C(OO)CC1(C)C	InChI=1S/C10H18O4/c1-10(2)6-8(14-12)7(10)4-5-9(11)13-3/h7-8,12H,4-6H2,1-3H3	J41	5.79e-06	0.000649096	0.000846251	0.000185846	9.25799e-06
130	C1014NO3	247.245	C1014O + NO2	O=CCC(C)(C)C(CCC(=O)OC)O[N+](=O)[O-]	InChI=1S/C10H17NO6/c1-10(2,6-7-12)8(17-11(14)15)4-5-9(13)16-3/h7-8H,4-6H2,1-3H3	J54	2.99e-06	0.000335198	0.006488	0.00091486	7.09787e-05
131	C1014OOH	218.247	C1014O + OH	O=CCC(C)(C)C(OO)CCC(=O)OC	InChI=1S/C10H18O5/c1-10(2,6-7-11)8(15-13)4-5-9(12)14-3/h7-8,13H,4-6H2,1-3H3	J41	5.79e-06	0.000649096	0.00268425	0.000565163	2.93657e-05
132	C101OOH	188.264	C101O + OH+ C101O + OH	CCCCCC(OO)CC(=O)CC	InChI=1S/C10H20O3/c1-3-5-6-7-10(13-12)8-9(11)4-2/h10,12H,3-8H2,1-2H3	J41+J22	9.77e-06	0.00109528	0.000846251	0.000185846	9.25799e-06
133	C102OOH	204.263	C102O + OH+ C102O + OH	CCCCCC(O)CC(=O)C(C)OO	InChI=1S/C10H20O4/c1-3-4-5-6-9(11)7-10(12)8(2)14-13/h8-9,11,13H,3-7H2,1-2H3	J41+J22	9.77e-06	0.00109528	0.00082554	0.000185846	9.03141e-06
134	C103CO	186.248	CO3C4CO3 + C4H9CHO + HO2	CCCCC(O)C(=O)CC(=O)CC	InChI=1S/C10H18O3/c1-3-5-6-9(12)10(13)7-8(11)4-2/h9,12H,3-7H2,1-2H3	J22.*2	7.96e-06	0.000892368	0.000576	0.00026212	6.30144e-06
135	C103NO3	233.262	C103O + NO2	CCCCC(O)C(CC(=O)CC)ON(=O)=O	InChI=1S/C10H19NO5/c1-3-5-6-9(13)10(16-11(14)15)7-8(12)4-2/h9-10,13H,3-7H2,1-2H3	J22	3.98e-06	0.000446184	0.00465	0.000743034	5.0871e-05
136	C103OH	188.264	C103O + HO2	CCCCC(O)C(O)CC(=O)CC	InChI=1S/C10H20O3/c1-3-5-6-9(12)10(13)7-8(11)4-2/h9-10,12-13H,3-7H2,1-2H3	J22	3.98e-06	0.000446184	0.000288	0.000185347	3.15072e-06
137	C103OOH	204.263	C103O + OH+ C103O + OH	CCCCC(O)C(OO)CC(=O)CC	InChI=1S/C10H20O4/c1-3-5-6-9(12)10(14-13)7-8(11)4-2/h9-10,12-13H,3-7H2,1-2H3	J41+J22	9.77e-06	0.00109528	0.00082554	0.000185846	9.03141e-06
138	C104OH	186.248	C4H9CO3 + CO3C4CHO + HO2	CCCCC(=O)C(O)CC(=O)CC	InChI=1S/C10H18O3/c1-3-5-6-9(12)10(13)7-8(11)4-2/h10,13H,3-7H2,1-2H3	J22.*2	7.96e-06	0.000892368	0.000576	0.00026212	6.30144e-06
139	C104OOH	202.248	C104O + OH+ C4H9CO3 + CO3C4CHO + OH	CCCCC(=O)C(OO)CC(=O)CC	InChI=1S/C10H18O4/c1-3-5-6-9(12)10(14-13)7-8(11)4-2/h10,13H,3-7H2,1-2H3	J41+J22.*2	1.375e-05	0.00154146	0.00113425	0.000262474	1.24087e-05
140	C105OOH	216.231	C105O + OH+ C105O + OH+ C105O + OH	CCCCC(=O)C(=O)C(OO)C(=O)CC	InChI=1S/C10H16O5/c1-3-5-6-8(12)9(13)10(15-14)7(11)4-2/h10,14H,3-6H2,1-2H3	J41+J22+J35	0.00027777	0.0311398	0.0294552	0.00762637	0.00032224
141	C106NO3	245.229	C106O + NO2+ C106O + NO2	O=CCC(=O)CC(C(=O)C)C(C)(C)ON(=O)=O	InChI=1S/C10H15NO6/c1-7(13)9(6-8(14)4-5-12)10(2,3)17-11(15)16/h5,9H,4,6H2,1-3H3	J55+J15	2.823e-05	0.00316477	0.006776	0.000933447	7.41294e-05
142	C106OH	200.232	C106O + HO2	O=CCC(=O)CC(C(=O)C)C(C)(C)O	InChI=1S/C10H16O4/c1-7(12)9(10(2,3)14)6-8(13)4-5-11/h5,9,14H,4,6H2,1-3H3	J15	1.99e-05	0.00223092	0.002414	0.000594623	2.64092e-05
143	C106OOH	216.231	C106O + OH+ C106O + OH	O=CCC(=O)CC(C(=O)C)C(C)(C)OO	InChI=1S/C10H16O5/c1-7(12)9(10(2,3)15-14)6-8(13)4-5-11/h5,9,14H,4,6H2,1-3H3	J41+J15	2.569e-05	0.00288002	0.00297225	0.000594779	3.25164e-05
144	C107OH	184.232	C107O + HO2	O=CCC1CC(O)(C(=O)C)C1(C)C	InChI=1S/C10H16O3/c1-7(12)10(13)6-8(4-5-11)9(10,2)3/h5,8,13H,4,6H2,1-3H3	J15	1.99e-05	0.00223092	0.002126	0.000564999	2.32584e-05
145	C107OOH	200.232	C107O + OH+ C107O + OH	O=CCC1CC(OO)(C(=O)C)C1(C)C	InChI=1S/C10H16O4/c1-7(12)10(14-13)6-8(4-5-11)9(10,2)3/h5,8,13H,4,6H2,1-3H3	J41+J15	2.569e-05	0.00288002	0.00268425	0.000565163	2.93657e-05
146	C108NO3	245.229	C108O + NO2+ C108O + NO2	O=CCC(CC(=O)C(=O)C)C(C)(C)ON(=O)=O	InChI=1S/C10H15NO6/c1-7(13)9(14)6-8(4-5-12)10(2,3)17-11(15)16/h5,8H,4,6H2,1-3H3	J55+J35	0.00027633	0.0309784	0.0436177	0.00774009	0.000477178
147	C108OH	200.232	C108O + HO2	O=CCC(CC(=O)C(=O)C)C(C)(C)O	InChI=1S/C10H16O4/c1-7(12)9(13)6-8(4-5-11)10(2,3)14/h5,8,14H,4,6H2,1-3H3	J35	0.000268	0.0300445	0.0304469	0.00764277	0.00033309
148	C108OOH	216.231	C108O + OH+ C108O + OH	O=CCC(CC(=O)C(=O)C)C(C)(C)OO	InChI=1S/C10H16O5/c1-7(12)9(13)6-8(4-5-11)10(2,3)15-14/h5,8,14H,4,6H2,1-3H3	J41+J35	0.00027379	0.0306936	0.0310052	0.00764278	0.000339197
149	C109CO	182.216	C89CO3 + CO + HO2+ C89CO3 + CO + HO2	O=CCC1CC(C(=O)C=O)C1(C)C	InChI=1S/C10H14O3/c1-10(2)7(3-4-11)5-8(10)9(13)6-12/h4,6-8H,3,5H2,1-2H3	J34+J15	0.0001449	0.0162442	0.003964	0.000777234	4.33662e-05
150	C109OH	184.232	C89CO3 + HCHO + HO2+ C920O2 + CO + HO2	O=CCC1CC(C(=O)CO)C1(C)C	InChI=1S/C10H16O3/c1-10(2)7(3-4-11)5-8(10)9(13)6-12/h4,7-8,12H,3,5-6H2,1-2H3	J22+J15	2.388e-05	0.0026771	0.002126	0.000564999	2.32584e-05
151	C109OOH	200.232	C109O + OH+ C109O + OH+ C89CO3 + HCHO + OH	OOCC(=O)C1CC(CC=O)C1(C)C	InChI=1S/C10H16O4/c1-10(2)7(3-4-11)5-8(10)9(12)6-14-13/h4,7-8,13H,3,5-6H2,1-2H3	J41+J15+J22	2.967e-05	0.0033262	0.00268425	0.000565163	2.93657e-05
152	C111OOH	202.291	C111O + OH+ C111O + OH	CCCCCCC(OO)CC(=O)CC	InChI=1S/C11H22O3/c1-3-5-6-7-8-11(14-13)9-10(12)4-2/h11,13H,3-9H2,1-2H3	J41+J22	9.77e-06	0.00109528	0.000846251	0.000185846	9.25799e-06
153	C112OOH	218.29	C112O + OH+ C112O + OH	CCCCCCC(O)CC(=O)C(C)OO	InChI=1S/C11H22O4/c1-3-4-5-6-7-10(12)8-11(13)9(2)15-14/h9-10,12,14H,3-8H2,1-2H3	J41+J22	9.77e-06	0.00109528	0.00082554	0.000185846	9.03141e-06
154	C113CO	200.275	CO3C4CO3 + C5H11CHO + HO2	CCCCCC(O)C(=O)CC(=O)CC	InChI=1S/C11H20O3/c1-3-5-6-7-10(13)11(14)8-9(12)4-2/h10,13H,3-8H2,1-2H3	J22.*2	7.96e-06	0.000892368	0.000576	0.00026212	6.30144e-06
155	C113NO3	247.288	C113O + NO2	CCCCCC(O)C(CC(=O)CC)ON(=O)=O	InChI=1S/C11H21NO5/c1-3-5-6-7-10(14)11(17-12(15)16)8-9(13)4-2/h10-11,14H,3-8H2,1-2H3	J22	3.98e-06	0.000446184	0.00465	0.000743034	5.0871e-05
156	C113OH	202.291	C113O + HO2	CCCCCC(O)C(O)CC(=O)CC	InChI=1S/C11H22O3/c1-3-5-6-7-10(13)11(14)8-9(12)4-2/h10-11,13-14H,3-8H2,1-2H3	J22	3.98e-06	0.000446184	0.000288	0.000185347	3.15072e-06
157	C113OOH	218.29	C113O + OH+ C113O + OH	CCCCCC(O)C(OO)CC(=O)CC	InChI=1S/C11H22O4/c1-3-5-6-7-10(13)11(15-14)8-9(12)4-2/h10-11,13-14H,3-8H2,1-2H3	J41+J22	9.77e-06	0.00109528	0.00082554	0.000185846	9.03141e-06
158	C114OH	200.275	C5H11CO3 + CO3C4CHO + HO2	CCCCCC(=O)C(O)CC(=O)CC	InChI=1S/C11H20O3/c1-3-5-6-7-10(13)11(14)8-9(12)4-2/h11,14H,3-8H2,1-2H3	J22.*2	7.96e-06	0.000892368	0.000576	0.00026212	6.30144e-06
159	C114OOH	216.274	C114O + OH+ C5H11CO3 + CO3C4CHO + OH	CCCCCC(=O)C(OO)CC(=O)CC	InChI=1S/C11H20O4/c1-3-5-6-7-10(13)11(15-14)8-9(12)4-2/h11,14H,3-8H2,1-2H3	J41+J22.*2	1.375e-05	0.00154146	0.00113425	0.000262474	1.24087e-05
160	C115OOH	230.258	C115O + OH+ C115O + OH+ C115O + OH	CCCCCC(=O)C(=O)C(OO)C(=O)CC	InChI=1S/C11H18O5/c1-3-5-6-7-9(13)10(14)11(16-15)8(12)4-2/h11,15H,3-7H2,1-2H3	J41+J22+J35	0.00027777	0.0311398	0.0294552	0.00762637	0.00032224
161	C116CHO	210.269	C116O2 + CO + HO2	O=CCCC(=O)C1CC(C)(C)C1CC=O	InChI=1S/C12H18O3/c1-12(2)8-9(10(12)5-7-14)11(15)4-3-6-13/h6-7,9-10H,3-5,8H2,1-2H3	J15.*2	3.98e-05	0.00446184	0.003964	0.000777234	4.33662e-05
162	C116CO3H	242.268	C116O2 + OH	O=CCC1C(CC1(C)C)C(=O)CCC(=O)OO	InChI=1S/C12H18O5/c1-12(2)7-8(9(12)5-6-13)10(14)3-4-11(15)17-16/h6,8-9,16H,3-5,7H2,1-2H3	J41	5.79e-06	0.000649096	0.00221137	0.000564999	2.41924e-05
163	C116NO3	243.256	C116O + NO2	O=CCC1C(CC1(C)C)C(=O)CCO[N+](=O)[O-]	InChI=1S/C11H17NO5/c1-11(2)7-8(9(11)3-5-13)10(14)4-6-17-12(15)16/h5,8-9H,3-4,6-7H2,1-2H3	J53	1.79e-06	0.000200671	0.00384726	0.00091486	4.20891e-05
164	C116OOH	214.258	C116O + OH	OOCCC(=O)C1CC(C)(C)C1CC=O	InChI=1S/C11H18O4/c1-11(2)7-8(9(11)3-5-12)10(13)4-6-15-14/h5,8-9,14H,3-4,6-7H2,1-2H3	J41	5.79e-06	0.000649096	0.00268425	0.000565163	2.93657e-05
165	C117NO3	259.256	C117O + NO2	OCCC(=O)C1(O[N+](=O)[O-])CC(C)(C)C1CC=O	InChI=1S/C11H17NO6/c1-10(2)7-11(18-12(16)17,8(10)3-5-13)9(15)4-6-14/h5,8,14H,3-4,6-7H2,1-2H3	J55	8.33e-06	0.000933847	0.00384726	0.00091486	4.20891e-05
166	C117OOH	230.258	C117O + OH	OCCC(=O)C1(OO)CC(C)(C)C1CC=O	InChI=1S/C11H18O5/c1-10(2)7-11(16-15,8(10)3-5-12)9(14)4-6-13/h5,8,13,15H,3-4,6-7H2,1-2H3	J41	5.79e-06	0.000649096	0.00266354	0.000565163	2.91391e-05
167	C118CO	228.242	C829O2 + HCOCH2CO3	OCCC(=O)C(=O)CC(C)(C)C(=O)CC=O	InChI=1S/C11H16O5/c1-11(2,10(16)4-6-13)7-9(15)8(14)3-5-12/h6,12H,3-5,7H2,1-2H3	J35	0.000268	0.0300445	0.0307349	0.00764501	0.00033624
168	C118NO3	275.255	C118O + NO2	OCCC(=O)C(=O)CC(C)(C)C(CC=O)O[N+](=O)[O-]	InChI=1S/C11H17NO7/c1-11(2,7-9(16)8(15)3-5-13)10(4-6-14)19-12(17)18/h6,10,13H,3-5,7H2,1-2H3	J54	2.99e-06	0.000335198	0.0436177	0.00774009	0.000477178
169	C118OOH	246.257	C118O + OH	OCCC(=O)C(=O)CC(C)(C)C(OO)CC=O	InChI=1S/C11H18O6/c1-11(2,10(17-16)4-6-13)7-9(15)8(14)3-5-12/h6,10,12,16H,3-5,7H2,1-2H3	J41	5.79e-06	0.000649096	0.0309845	0.00764278	0.00033897
170	C1210CO3H	256.295	C1210CO2 + OH	O=CCCC(=O)C1CC(C)(C)C1CCC(=O)OO	InChI=1S/C13H20O5/c1-13(2)8-9(11(15)4-3-7-14)10(13)5-6-12(16)18-17/h7,9-10,17H,3-6,8H2,1-2H3	J41	5.79e-06	0.000649096	0.00221137	0.000564999	2.41924e-05
171	C1210NO3	257.283	C1210O + NO2	O=CCCC(=O)C1CC(C)(C)C1CCO[N+](=O)[O-]	InChI=1S/C12H19NO5/c1-12(2)8-9(11(15)4-3-6-14)10(12)5-7-18-13(16)17/h6,9-10H,3-5,7-8H2,1-2H3	J53	1.79e-06	0.000200671	0.00384726	0.00091486	4.20891e-05
172	C1210OOH	228.285	C1210O + OH	OOCCC1C(CC1(C)C)C(=O)CCC=O	InChI=1S/C12H20O4/c1-12(2)8-9(10(12)5-7-16-15)11(14)4-3-6-13/h6,9-10,15H,3-5,7-8H2,1-2H3	J41	5.79e-06	0.000649096	0.00268425	0.000565163	2.93657e-05
173	C1211CO	226.269	C1212O2 + HO2	O=CCC(=O)C1CC(C)(C)C1CCC(=O)O	InChI=1S/C12H18O4/c1-12(2)7-8(10(14)5-6-13)9(12)3-4-11(15)16/h6,8-9H,3-5,7H2,1-2H3,(H,15,16)	J15	1.99e-05	0.00223092	0.002126	0.000564999	2.32584e-05
174	C1211CO3H	272.294	C1211O2 + OH	OOC(=O)CCC(=O)C1CC(C)(C)C1CCC(=O)O	InChI=1S/C13H20O6/c1-13(2)7-8(9(13)3-5-11(15)16)10(14)4-6-12(17)19-18/h8-9,18H,3-7H2,1-2H3,(H,15,16)	J41	5.79e-06	0.000649096	0.000373369	0.000185347	4.08466e-06
175	C1211NO3	273.282	C1211O + NO2	OC(=O)CCC1C(CC1(C)C)C(=O)CCO[N+](=O)[O-]	InChI=1S/C12H19NO6/c1-12(2)7-8(9(12)3-4-11(15)16)10(14)5-6-19-13(17)18/h8-9H,3-7H2,1-2H3,(H,15,16)	J53	1.79e-06	0.000200671	0.00200926	0.000743034	2.19814e-05
176	C1211OOH	244.284	C1211O + OH	OOCCC(=O)C1CC(C)(C)C1CCC(=O)O	InChI=1S/C12H20O5/c1-12(2)7-8(10(13)5-6-17-16)9(12)3-4-11(14)15/h8-9,16H,3-7H2,1-2H3,(H,14,15)	J41	5.79e-06	0.000649096	0.000846251	0.000185846	9.25799e-06
177	C1212NO3	305.281	C1212O + NO2	OCCC(=O)C1(OO[N+](=O)[O-])CC(C)(C)C1CCC(=O)O	InChI=1S/C12H19NO8/c1-11(2)7-12(9(15)5-6-14,20-21-13(18)19)8(11)3-4-10(16)17/h8,14H,3-7H2,1-2H3,(H,16,17)	J55	8.33e-06	0.000933847	0.00200926	0.000743034	2.19814e-05
178	C1212OOH	260.284	C1212O + OH	OCCC(=O)C1(OO)CC(C)(C)C1CCC(=O)O	InChI=1S/C12H20O6/c1-11(2)7-12(18-17,9(14)5-6-13)8(11)3-4-10(15)16/h8,13,17H,3-7H2,1-2H3,(H,15,16)	J41	5.79e-06	0.000649096	0.00082554	0.000185846	9.03141e-06
179	C1213NO3	305.281	C1213O + NO2	OCCC(=O)C(=O)CC(C)(C)C(CCC(=O)O)O[N+](=O)[O-]	InChI=1S/C12H19NO8/c1-12(2,7-9(16)8(15)5-6-14)10(21-13(19)20)3-4-11(17)18/h10,14H,3-7H2,1-2H3,(H,17,18)	J55	8.33e-06	0.000933847	0.0288017	0.00847364	0.00031509
180	C1213OOH	276.283	C1213O + OH	OCCC(=O)C(=O)CC(C)(C)C(OO)CCC(=O)O	InChI=1S/C12H20O7/c1-12(2,7-9(15)8(14)5-6-13)10(19-18)3-4-11(16)17/h10,13,18H,3-7H2,1-2H3,(H,16,17)	J41	5.79e-06	0.000649096	0.0291465	0.00847359	0.000318863
181	C1214OOH	244.284	C1214O + OH	O=CCCC(=O)C1(OO)CC(C)(C)C1CCO	InChI=1S/C12H20O5/c1-11(2)8-12(17-16,9(11)5-7-14)10(15)4-3-6-13/h6,9,14,16H,3-5,7-8H2,1-2H3	J41	5.79e-06	0.000649096	0.00266354	0.000565163	2.91391e-05
182	C1215NO3	289.282	C1215O + NO2	O=CCCC(=O)C(=O)CC(C)(C)C(CCO)O[N+](=O)[O-]	InChI=1S/C12H19NO7/c1-12(2,11(5-7-15)20-13(18)19)8-10(17)9(16)4-3-6-14/h6,11,15H,3-5,7-8H2,1-2H3	J54	2.99e-06	0.000335198	0.0436177	0.00857809	0.000477178
183	C1215OOH	260.284	C1215O + OH	O=CCCC(=O)C(=O)CC(C)(C)C(OO)CCO	InChI=1S/C12H20O6/c1-12(2,11(18-17)5-7-14)8-10(16)9(15)4-3-6-13/h6,11,14,17H,3-5,7-8H2,1-2H3	J41	5.79e-06	0.000649096	0.0309845	0.00849038	0.00033897
184	C121OOH	216.317	C121O + OH+ C121O + OH	CCCCCCCC(OO)CC(=O)CC	InChI=1S/C12H24O3/c1-3-5-6-7-8-9-12(15-14)10-11(13)4-2/h12,14H,3-10H2,1-2H3	J41+J22	9.77e-06	0.00109528	0.000846251	0.000185846	9.25799e-06
185	C122OOH	232.317	C122O + OH+ C122O + OH	CCCCCCCC(O)CC(=O)C(C)OO	InChI=1S/C12H24O4/c1-3-4-5-6-7-8-11(13)9-12(14)10(2)16-15/h10-11,13,15H,3-9H2,1-2H3	J41+J22	9.77e-06	0.00109528	0.00082554	0.000185846	9.03141e-06
186	C123CO	214.301	CO3C4CO3 + C6H13CHO + HO2	CCCCCCC(O)C(=O)CC(=O)CC	InChI=1S/C12H22O3/c1-3-5-6-7-8-11(14)12(15)9-10(13)4-2/h11,14H,3-9H2,1-2H3	J22.*2	7.96e-06	0.000892368	0.000576	0.00026212	6.30144e-06
187	C123NO3	261.315	C123O + NO2	CCCCCCC(O)C(CC(=O)CC)ON(=O)=O	InChI=1S/C12H23NO5/c1-3-5-6-7-8-11(15)12(18-13(16)17)9-10(14)4-2/h11-12,15H,3-9H2,1-2H3	J22	3.98e-06	0.000446184	0.00465	0.000743034	5.0871e-05
188	C123OH	216.317	C123O + HO2	CCCCCCC(O)C(O)CC(=O)CC	InChI=1S/C12H24O3/c1-3-5-6-7-8-11(14)12(15)9-10(13)4-2/h11-12,14-15H,3-9H2,1-2H3	J22	3.98e-06	0.000446184	0.000288	0.000185347	3.15072e-06
189	C123OOH	232.317	C123O + OH+ C123O + OH	CCCCCCC(O)C(OO)CC(=O)CC	InChI=1S/C12H24O4/c1-3-5-6-7-8-11(14)12(16-15)9-10(13)4-2/h11-12,14-15H,3-9H2,1-2H3	J41+J22	9.77e-06	0.00109528	0.00082554	0.000185846	9.03141e-06
190	C124OH	214.301	C6H13CO3 + CO3C4CHO + HO2	CCCCCCC(=O)C(O)CC(=O)CC	InChI=1S/C12H22O3/c1-3-5-6-7-8-11(14)12(15)9-10(13)4-2/h12,15H,3-9H2,1-2H3	J22.*2	7.96e-06	0.000892368	0.000576	0.00026212	6.30144e-06
191	C124OOH	230.301	C124O + OH+ C6H13CO3 + CO3C4CHO + OH	CCCCCCC(=O)C(OO)CC(=O)CC	InChI=1S/C12H22O4/c1-3-5-6-7-8-11(14)12(16-15)9-10(13)4-2/h12,15H,3-9H2,1-2H3	J41+J22.*2	1.375e-05	0.00154146	0.00113425	0.000262474	1.24087e-05
192	C125OOH	244.284	C125O + OH+ C125O + OH+ C125O + OH	CCCCCCC(=O)C(=O)C(OO)C(=O)CC	InChI=1S/C12H20O5/c1-3-5-6-7-8-10(14)11(15)12(17-16)9(13)4-2/h12,16H,3-8H2,1-2H3	J41+J22+J35	0.00027777	0.0311398	0.0294552	0.00847562	0.00032224
193	C126CHO	208.297	C126O2 + CO + HO2	O=CCCC(=C)C1CC(C)(C)C1CC=O	InChI=1S/C13H20O2/c1-10(5-4-7-14)11-9-13(2,3)12(11)6-8-15/h7-8,11-12H,1,4-6,9H2,2-3H3	J15.*2	3.98e-05	0.00446184	0.1255	0.0120208	0.00137297
194	C126CO3H	240.296	C126O2 + OH	O=CCC1C(CC1(C)C)C(=C)CCC(=O)OO	InChI=1S/C13H20O4/c1-9(4-5-12(15)17-16)10-8-13(2,3)11(10)6-7-14/h7,10-11,16H,1,4-6,8H2,2-3H3	J41	5.79e-06	0.000649096	0.00041165	0.000277531	4.50345e-06
195	C126NO3	241.284	C126O + NO2	O=CCC1C(CC1(C)C)C(=C)CCO[N+](=O)[O-]	InChI=1S/C12H19NO4/c1-9(5-7-17-13(15)16)10-8-12(2,3)11(10)4-6-14/h6,10-11H,1,4-5,7-8H2,2-3H3	J53	1.79e-06	0.000200671	0.047758	0.00133492	0.000522473
196	C126OOH	212.285	C126O + OH	OOCCC(=C)C1CC(C)(C)C1CC=O	InChI=1S/C12H20O3/c1-9(5-7-15-14)10-8-12(2,3)11(10)4-6-13/h6,10-11,14H,1,4-5,7-8H2,2-3H3	J41	5.79e-06	0.000649096	0.000884532	0.000277865	9.67678e-06
197	C127NO3	257.283	C127O + NO2	OCCC(=C)C1(O[N+](=O)[O-])CC(C)(C)C1CC=O	InChI=1S/C12H19NO5/c1-9(4-6-14)12(18-13(16)17)8-11(2,3)10(12)5-7-15/h7,10,14H,1,4-6,8H2,2-3H3	J55	8.33e-06	0.000933847	0.047758	0.00133492	0.000522473
198	C127OOH	228.285	C127O + OH	OCCC(=C)C1(OO)CC(C)(C)C1CC=O	InChI=1S/C12H20O4/c1-9(4-6-13)12(16-15)8-11(2,3)10(12)5-7-14/h7,10,13,15H,1,4-6,8H2,2-3H3	J41	5.79e-06	0.000649096	0.000863821	0.000277865	9.4502e-06
199	C128CO	226.269	C927O2 + HCOCH2CO3	OCCC(=C)C(=O)CC(C)(C)C(=O)CC=O	InChI=1S/C12H18O4/c1-9(4-6-13)10(15)8-12(2,3)11(16)5-7-14/h7,13H,1,4-6,8H2,2-3H3	J22	3.98e-06	0.000446184	0.00246044	0.000582259	2.69172e-05
200	C128NO3	273.282	C128O + NO2	OCCC(=C)C(=O)CC(C)(C)C(CC=O)O[N+](=O)[O-]	InChI=1S/C12H19NO6/c1-9(4-6-14)10(16)8-12(2,3)11(5-7-15)19-13(17)18/h7,11,14H,1,4-6,8H2,2-3H3	J54	2.99e-06	0.000335198	0.00497628	0.000793173	5.44405e-05
201	C128OOH	244.284	C128O + OH	OCCC(=C)C(=O)CC(C)(C)C(OO)CC=O	InChI=1S/C12H20O5/c1-9(4-6-13)10(15)8-12(2,3)11(17-16)5-7-14/h7,11,13,16H,1,4-6,8H2,2-3H3	J41	5.79e-06	0.000649096	0.00270998	0.000552139	2.96472e-05
202	C129CO	224.253	C830CO3 + HCOCH2CO3	O=CCC(=O)C(=O)C1CC(C)(C)C1CC=O	InChI=1S/C12H16O4/c1-12(2)7-8(9(12)3-5-13)11(16)10(15)4-6-14/h5-6,8-9H,3-4,7H2,1-2H3	J35	0.000268	0.0300445	0.0322849	0.00850713	0.000353197
203	C129OOH	242.268	C129O + OH	O=CCC(OO)C(=O)C1CC(C)(C)C1CC=O	InChI=1S/C12H18O5/c1-12(2)7-8(9(12)3-5-13)11(15)10(17-16)4-6-14/h5-6,8-10,16H,3-4,7H2,1-2H3	J41	5.79e-06	0.000649096	0.00452225	0.000777354	4.94734e-05
204	C1310NO3	303.308	C1310O + NO2	OCCC(=C)C(=O)CC(C)(C)C(CCC(=O)O)O[N+](=O)[O-]	InChI=1S/C13H21NO7/c1-9(6-7-15)10(16)8-13(2,3)11(21-14(19)20)4-5-12(17)18/h11,15H,1,4-8H2,2-3H3,(H,17,18)	J55	8.33e-06	0.000933847	0.0147963	0.000743034	0.000161872
205	C1310OOH	274.31	C1310O + OH	OCCC(=C)C(=O)CC(C)(C)C(OO)CCC(=O)O	InChI=1S/C13H22O6/c1-9(6-7-14)10(15)8-13(2,3)11(19-18)4-5-12(16)17/h11,14,18H,1,4-8H2,2-3H3,(H,16,17)	J41	5.79e-06	0.000649096	0.000871979	0.000141379	9.53945e-06
206	C1311NO3	271.31	C1311O + NO2	O=CCCC(=C)C1(O[N+](=O)[O-])CC(C)(C)C1CCO	InChI=1S/C13H21NO5/c1-10(5-4-7-15)13(19-14(17)18)9-12(2,3)11(13)6-8-16/h7,11,16H,1,4-6,8-9H2,2-3H3	J55	8.33e-06	0.000933847	0.047758	0.00133492	0.000522473
207	C1311OOH	242.311	C1311O + OH	O=CCCC(=C)C1(OO)CC(C)(C)C1CCO	InChI=1S/C13H22O4/c1-10(5-4-7-14)13(17-16)9-12(2,3)11(13)6-8-15/h7,11,15-16H,1,4-6,8-9H2,2-3H3	J41	5.79e-06	0.000649096	0.000863821	0.000277865	9.4502e-06
208	C1312NO3	287.309	C1312O + NO2	O=CCCC(=C)C(=O)CC(C)(C)C(CCO)O[N+](=O)[O-]	InChI=1S/C13H21NO6/c1-10(5-4-7-15)11(17)9-13(2,3)12(6-8-16)20-14(18)19/h7,12,16H,1,4-6,8-9H2,2-3H3	J54	2.99e-06	0.000335198	0.00497628	0.000793173	5.44405e-05
209	C1312OOH	258.311	C1312O + OH	O=CCCC(=C)C(=O)CC(C)(C)C(OO)CCO	InChI=1S/C13H22O5/c1-10(5-4-7-14)11(16)9-13(2,3)12(18-17)6-8-15/h7,12,15,17H,1,4-6,8-9H2,2-3H3	J41	5.79e-06	0.000649096	0.00270998	0.000552139	2.96472e-05
210	C1313OOH	258.311	C1313O + OH	O=CCCC(CO)(OO)C1CC(C)(C)C1CC=O	InChI=1S/C13H22O5/c1-12(2)8-11(10(12)4-7-15)13(9-16,18-17)5-3-6-14/h6-7,10-11,16-17H,3-5,8-9H2,1-2H3	J41	5.79e-06	0.000649096	0.00421354	0.000754934	4.60961e-05
211	C131CO3H	270.322	C131O2 + OH	OOC(=O)CCC(=O)C1CC(C)(C)C1CCC(=O)C	InChI=1S/C14H22O5/c1-9(15)4-5-11-10(8-14(11,2)3)12(16)6-7-13(17)19-18/h10-11,18H,4-8H2,1-3H3	J41	5.79e-06	0.000649096	0.000661369	0.00026212	7.23538e-06
212	C131NO3	271.31	C131O + NO2	CC(=O)CCC1C(CC1(C)C)C(=O)CCO[N+](=O)[O-]	InChI=1S/C13H21NO5/c1-9(15)4-5-11-10(8-13(11,2)3)12(16)6-7-19-14(17)18/h10-11H,4-8H2,1-3H3	J53	1.79e-06	0.000200671	0.00229726	0.000765802	2.51321e-05
213	C131OOH	242.311	C131O + OH	OOCCC(=O)C1CC(C)(C)C1CCC(=O)C	InChI=1S/C13H22O4/c1-9(14)4-5-11-10(8-13(11,2)3)12(15)6-7-17-16/h10-11,16H,4-8H2,1-3H3	J41	5.79e-06	0.000649096	0.00113425	0.000262474	1.24087e-05
214	C132OOH	258.311	C132O + OH	OCCC(=O)C1(OO)CC(C)(C)C1CCC(=O)C	InChI=1S/C13H22O5/c1-9(15)4-5-10-12(2,3)8-13(10,18-17)11(16)6-7-14/h10,14,17H,4-8H2,1-3H3	J41	5.79e-06	0.000649096	0.00111354	0.000262474	1.21821e-05
215	C133CO	256.295	C827CO3 + HOC2H4CO3	OCCC(=O)C(=O)CC(C)(C)C(=O)CCC(=O)C	InChI=1S/C13H20O5/c1-9(15)4-5-12(18)13(2,3)8-11(17)10(16)6-7-14/h14H,4-8H2,1-3H3	J35	0.000268	0.0300445	0.0291849	0.00847763	0.000319283
216	C133NO3	303.308	C133O + NO2+ C133O + NO2	OCCC(=O)C(=O)CC(C)(C)C(CCC(=O)C)O[N+](=O)[O-]	InChI=1S/C13H21NO7/c1-9(16)4-5-12(21-14(19)20)13(2,3)8-11(18)10(17)6-7-15/h12,15H,4-8H2,1-3H3	J54+J35	0.00027099	0.0303797	0.0332589	0.0085061	0.000363853
217	C133OH	258.311	C133O + HO2	OCCC(=O)C(=O)CC(C)(C)C(O)CCC(=O)C	InChI=1S/C13H22O5/c1-9(15)4-5-12(18)13(2,3)8-11(17)10(16)6-7-14/h12,14,18H,4-8H2,1-3H3	J35	0.000268	0.0300445	0.0288969	0.00847561	0.000316133
218	C133OOH	274.31	C133O + OH+ C133O + OH	OCCC(=O)C(=O)CC(C)(C)C(OO)CCC(=O)C	InChI=1S/C13H22O6/c1-9(15)4-5-12(19-18)13(2,3)8-11(17)10(16)6-7-14/h12,14,18H,4-8H2,1-3H3	J41+J35	0.00027379	0.0306936	0.0294345	0.00847562	0.000322013
219	C134CO	270.278	C827CO3 + CO + HOC2H4CO3	OCCC(=O)C(=O)C(=O)C(C)(C)C(=O)CCC(=O)C	InChI=1S/C13H18O6/c1-8(15)4-5-10(17)13(2,3)12(19)11(18)9(16)6-7-14/h14H,4-7H2,1-3H3	J35	0.000268	0.0300445	0.0294729	0.00847966	0.000322434
220	C134OH	272.294	C827CHO + HO2 + CO + HOC2H4CO3	OCCC(=O)C(=O)C(O)C(C)(C)C(=O)CCC(=O)C	InChI=1S/C13H20O6/c1-8(15)4-5-10(17)13(2,3)12(19)11(18)9(16)6-7-14/h12,14,19H,4-7H2,1-3H3	J35	0.000268	0.0300445	0.0291849	0.00847763	0.000319283
221	C134OOH	288.294	C134O + OH+ C134O + OH	OCCC(=O)C(=O)C(OO)C(C)(C)C(=O)CCC(=O)C	InChI=1S/C13H20O7/c1-8(15)4-5-10(17)13(2,3)12(20-19)11(18)9(16)6-7-14/h12,14,19H,4-7H2,1-3H3	J41+J35	0.00027379	0.0306936	0.0297225	0.00847765	0.000325164
222	C135OOH	302.277	C135O + OH+ C135O + OH	OCC(OO)C(=O)C(=O)C(=O)C(C)(C)C(=O)CCC(=O)C	InChI=1S/C13H18O8/c1-7(15)4-5-9(16)13(2,3)12(19)11(18)10(17)8(6-14)21-20/h8,14,20H,4-6H2,1-3H3	J41+J35	0.00027379	0.0306936	0.0300105	0.00847967	0.000328315
223	C136CO3H	254.322	C136CO2 + OH	O=CCCC(=C)C1CC(C)(C)C1CCC(=O)OO	InChI=1S/C14H22O4/c1-10(5-4-8-15)11-9-14(2,3)12(11)6-7-13(16)18-17/h8,11-12,17H,1,4-7,9H2,2-3H3	J41	5.79e-06	0.000649096	0.00041165	0.000277531	4.50345e-06
224	C136NO3	255.31	C136O + NO2	O=CCCC(=C)C1CC(C)(C)C1CCO[N+](=O)[O-]	InChI=1S/C13H21NO4/c1-10(5-4-7-15)11-9-13(2,3)12(11)6-8-18-14(16)17/h7,11-12H,1,4-6,8-9H2,2-3H3	J53	1.79e-06	0.000200671	0.047758	0.00133492	0.000522473
225	C136OOH	226.312	C136O + OH	OOCCC1C(CC1(C)C)C(=C)CCC=O	InChI=1S/C13H22O3/c1-10(5-4-7-14)11-9-13(2,3)12(11)6-8-16-15/h7,11-12,15H,1,4-6,8-9H2,2-3H3	J41	5.79e-06	0.000649096	0.000884532	0.000277865	9.67678e-06
226	C137CO	224.296	C139O2 + HO2	O=CCC(=C)C1CC(C)(C)C1CCC(=O)O	InChI=1S/C13H20O3/c1-9(6-7-14)10-8-13(2,3)11(10)4-5-12(15)16/h7,10-11H,1,4-6,8H2,2-3H3,(H,15,16)	J15	1.99e-05	0.00223092	0.000326281	0.000277531	3.56951e-06
227	C137CO3H	270.322	C137O2 + OH	OOC(=O)CCC(=C)C1CC(C)(C)C1CCC(=O)O	InChI=1S/C14H22O5/c1-9(4-7-13(17)19-18)10-8-14(2,3)11(10)5-6-12(15)16/h10-11,18H,1,4-8H2,2-3H3,(H,15,16)	J41	5.79e-06	0.000649096	8.5369e-05	NaN	9.33937e-07
228	C137NO3	271.31	C137O + NO2	OC(=O)CCC1C(CC1(C)C)C(=C)CCO[N+](=O)[O-]	InChI=1S/C13H21NO5/c1-9(6-7-19-14(17)18)10-8-13(2,3)11(10)4-5-12(15)16/h10-11H,1,4-8H2,2-3H3,(H,15,16)	J53	1.79e-06	0.000200671	6.8088e-05	3.23144e-05	7.44882e-07
229	C137OOH	242.311	C137O + OH	OOCCC(=C)C1CC(C)(C)C1CCC(=O)O	InChI=1S/C13H22O4/c1-9(6-7-17-16)10-8-13(2,3)11(10)4-5-12(14)15/h10-11,16H,1,4-8H2,2-3H3,(H,14,15)	J41	5.79e-06	0.000649096	0.000558251	1.36143e-05	6.10727e-06
230	C139NO3	303.308	C139O + NO2	OCCC(=C)C1(OO[N+](=O)[O-])CC(C)(C)C1CCC(=O)O	InChI=1S/C13H21NO7/c1-9(6-7-15)13(20-21-14(18)19)8-12(2,3)10(13)4-5-11(16)17/h10,15H,1,4-8H2,2-3H3,(H,16,17)	J55	8.33e-06	0.000933847	6.8088e-05	3.23144e-05	7.44882e-07
231	C139OOH	258.311	C139O + OH	OCCC(=C)C1(OO)CC(C)(C)C1CCC(=O)O	InChI=1S/C13H22O5/c1-9(6-7-14)13(18-17)8-12(2,3)10(13)4-5-11(15)16/h10,14,17H,1,4-8H2,2-3H3,(H,15,16)	J41	5.79e-06	0.000649096	0.00053754	1.36143e-05	5.88069e-06
232	C141CO	222.323	C144O + HO2	O=CCC(=C)C1CC(C)(C)C1CCC(=O)C	InChI=1S/C14H22O2/c1-10(7-8-15)12-9-14(3,4)13(12)6-5-11(2)16/h8,12-13H,1,5-7,9H2,2-4H3	J15	1.99e-05	0.00223092	0.00217244	0.000551971	2.37665e-05
233	C141CO3H	268.349	C141O2 + OH	OOC(=O)CCC(=C)C1CC(C)(C)C1CCC(=O)C	InChI=1S/C15H24O4/c1-10(5-8-14(17)19-18)12-9-15(3,4)13(12)7-6-11(2)16/h12-13,18H,1,5-9H2,2-4H3	J41	5.79e-06	0.000649096	0.000419808	0.000140722	4.5927e-06
234	C141NO3	269.337	C141O + NO2	CC(=O)CCC1C(CC1(C)C)C(=C)CCO[N+](=O)[O-]	InChI=1S/C14H23NO4/c1-10(7-8-19-15(17)18)12-9-14(3,4)13(12)6-5-11(2)16/h12-13H,1,5-9H2,2-4H3	J53	1.79e-06	0.000200671	0.0147963	0.000743034	0.000161872
235	C141OOH	240.339	C141O + OH	OOCCC(=C)C1CC(C)(C)C1CCC(=O)C	InChI=1S/C14H24O3/c1-10(7-8-17-16)12-9-14(3,4)13(12)6-5-11(2)15/h12-13,16H,1,5-9H2,2-4H3	J41	5.79e-06	0.000649096	0.00089269	0.000141379	9.76603e-06
236	C142NO3	285.336	C142O + NO2	OCCC(=C)C1(O[N+](=O)[O-])CC(C)(C)C1CCC(=O)C	InChI=1S/C14H23NO5/c1-10(7-8-16)14(20-15(18)19)9-13(3,4)12(14)6-5-11(2)17/h12,16H,1,5-9H2,2-4H3	J55	8.33e-06	0.000933847	0.0147963	0.000743034	0.000161872
237	C142OOH	256.338	C142O + OH	OCCC(=C)C1(OO)CC(C)(C)C1CCC(=O)C	InChI=1S/C14H24O4/c1-10(7-8-15)14(18-17)9-13(3,4)12(14)6-5-11(2)16/h12,15,17H,1,5-9H2,2-4H3	J41	5.79e-06	0.000649096	0.000871979	0.000141379	9.53945e-06
238	C143CO	254.322	C927O2 + CO2C4CO3	OCCC(=C)C(=O)CC(C)(C)C(=O)CCC(=O)C	InChI=1S/C14H22O4/c1-10(7-8-15)12(17)9-14(3,4)13(18)6-5-11(2)16/h15H,1,5-9H2,2-4H3	J22.*3	1.194e-05	0.00133855	0.000910439	0.000297506	9.9602e-06
239	C143NO3	301.336	C143O + NO2	OCCC(=C)C(=O)CC(C)(C)C(CCC(=O)C)O[N+](=O)[O-]	InChI=1S/C14H23NO6/c1-10(7-8-16)12(18)9-14(3,4)13(21-15(19)20)6-5-11(2)17/h13,16H,1,5-9H2,2-4H3	J54	2.99e-06	0.000335198	0.00498444	0.000756242	5.45298e-05
240	C143OOH	272.337	C143O + OH	OCCC(=C)C(=O)CC(C)(C)C(OO)CCC(=O)C	InChI=1S/C14H24O5/c1-10(7-8-15)12(17)9-14(3,4)13(19-18)6-5-11(2)16/h13,15,18H,1,5-9H2,2-4H3	J41	5.79e-06	0.000649096	0.00115998	0.000233113	1.26902e-05
241	C144OOH	272.337	C144O + OH	O=CCC(CO)(OO)C1CC(C)(C)C1CCC(=O)C	InChI=1S/C14H24O5/c1-10(17)4-5-11-12(8-13(11,2)3)14(9-16,19-18)6-7-15/h7,11-12,16,18H,4-6,8-9H2,1-3H3	J41	5.79e-06	0.000649096	0.00266354	0.000565163	2.91391e-05
242	C145OOH	304.336	C145O + OH	OCCC(CO)(OO)C(=O)CC(C)(C)C(=O)CCC(=O)C	InChI=1S/C14H24O7/c1-10(17)4-5-11(18)13(2,3)8-12(19)14(9-16,21-20)6-7-15/h15-16,20H,4-9H2,1-3H3	J41	5.79e-06	0.000649096	0.00140154	0.000321319	1.53328e-05
243	C146CO	252.306	C1011CO3 + HCOCH2CO3	O=CCC(=O)C(=O)C1CC(C)(C)C1CCC(=O)C	InChI=1S/C14H20O4/c1-9(16)4-5-11-10(8-14(11,2)3)13(18)12(17)6-7-15/h7,10-11H,4-6,8H2,1-3H3	J35	0.000268	0.0300445	0.0307349	0.0084924	0.00033624
244	C146OOH	270.322	C146O + OH	O=CCC(OO)C(=O)C1CC(C)(C)C1CCC(=O)C	InChI=1S/C14H22O5/c1-9(16)4-5-11-10(8-14(11,2)3)13(17)12(19-18)6-7-15/h7,10-12,18H,4-6,8H2,1-3H3	J41	5.79e-06	0.000649096	0.00297225	0.000594779	3.25164e-05
245	C147OOH	286.321	C147O + OH	OOC(CC(=O)O)C(=O)C1CC(C)(C)C1CCC(=O)C	InChI=1S/C14H22O6/c1-8(15)4-5-10-9(7-14(10,2)3)13(18)11(20-19)6-12(16)17/h9-11,19H,4-7H2,1-3H3,(H,16,17)	J41	5.79e-06	0.000649096	0.00111354	0.000262474	1.21821e-05
246	C148CO	268.131	C1013CO3 + HCOCH2CO3	O=CCC(=O)C(=O)C1CC(C)(C)C1CCC(=O)OC	InChI=1S/C14H20O5/c1-14(2)8-9(13(18)11(16)6-7-15)10(14)4-5-12(17)19-3/h7,9-10H,4-6,8H2,1-3H3	J35	0.000268	0.0300445	0.0307349	0.0084924	0.00033624
247	C148OOH	286.142	C148O + OH	O=CCC(OO)C(=O)C1CC(C)(C)C1CCC(=O)OC	InChI=1S/C14H22O6/c1-14(2)8-9(10(14)4-5-12(16)19-3)13(17)11(20-18)6-7-15/h7,9-11,18H,4-6,8H2,1-3H3	J41	5.79e-06	0.000649096	0.00297225	0.000594779	3.25164e-05
248	C14O3ECHO	144.125	HO2 + CO + BUTALAO2	CCC(C=O)OC(=O)C=O	InChI=1S/C6H8O4/c1-2-5(3-7)10-6(9)4-8/h3-5H,2H2,1H3	J34	0.000125	0.0140133	0.0164187	0.000460266	0.000179621
249	C14O3IPCHO	158.152	HO2 + CO + IC4CHOAO2	O=CC(=O)OC(C=O)C(C)C	InChI=1S/C7H10O4/c1-5(2)6(3-8)11-7(10)4-9/h3-6H,1-2H3	J34	0.000125	0.0140133	0.002656	0.000351879	2.90566e-05
250	C14O3PCHO	158.152	HO2 + CO + C4CHOAO2	CCCC(C=O)OC(=O)C=O	InChI=1S/C7H10O4/c1-2-3-6(4-8)11-7(10)5-9/h4-6H,2-3H2,1H3	J34	0.000125	0.0140133	0.0152487	0.000489252	0.000166821
251	C151OOH	302.363	C151O + OH	OCC(OO)(CCC(=O)O)C1CC(C)(C)C1CCC(=O)C	InChI=1S/C15H26O6/c1-10(17)4-5-11-12(8-14(11,2)3)15(9-16,21-20)7-6-13(18)19/h11-12,16,20H,4-9H2,1-3H3,(H,18,19)	J41	5.79e-06	0.000649096	0.00082554	0.000185846	9.03141e-06
252	C152OOH	302.363	C152O + OH	O=CCCC(CO)(OO)C1CC(C)(C)C1CCC(=O)OC	InChI=1S/C15H26O6/c1-14(2)9-12(11(14)5-6-13(18)20-3)15(10-17,21-19)7-4-8-16/h8,11-12,17,19H,4-7,9-10H2,1-3H3	J41	5.79e-06	0.000649096	0.00266354	0.000565163	2.91391e-05
253	C1H4C5CO3H	162.141	CHOC4OHO2 + OH+ CHOC4OHO2 + OH	O=CCCC(O)CC(=O)OO	InChI=1S/C6H10O5/c7-3-1-2-5(8)4-6(9)11-10/h3,5,8,10H,1-2,4H2	J41+J15	2.569e-05	0.00288002	0.00229537	5.72e-06	2.51113e-05
254	C235C6CO3H	188.135	CO235C6O2 + OH+ CO235C6O2 + OH	OOC(=O)CC(=O)CC(=O)C(=O)C	InChI=1S/C7H8O6/c1-4(8)6(10)2-5(9)3-7(11)13-12/h12H,2-3H2,1H3	J41+J35	0.00027379	0.0306936	0.0289823	0.00762636	0.000317066
255	C23C54CHO	128.126	CH3CO3 + IBUDIALCO3	O=CC(C)C(=O)C(=O)C	InChI=1S/C6H8O3/c1-4(3-7)6(9)5(2)8/h3-4H,1-2H3	J35	0.000268	0.0300445	0.0308189	0.00762411	0.000337159
256	C23C54CO3H	160.125	CO23C54O2 + OH	OOC(=O)C(C)C(=O)C(=O)C	InChI=1S/C6H8O5/c1-3(6(9)11-10)5(8)4(2)7/h3,10H,1-2H3	J41	5.79e-06	0.000649096	0.0286943	0.00762411	0.000313916
257	C23O3CCHO	130.099	CO + MCOCOMOXO2 + HO2	O=CCOC(=O)C(=O)C	InChI=1S/C5H6O4/c1-4(7)5(8)9-3-2-6/h2H,3H2,1H3	J15	1.99e-05	0.00223092	0.03565	0.034	0.000390011
258	C23O3CCO3H	162.097	OH + MCOCOMOXO2	OOC(=O)COC(=O)C(=O)C	InChI=1S/C5H6O6/c1-3(6)5(8)10-2-4(7)11-9/h9H,2H2,1H3	J41	5.79e-06	0.000649096	0.0340854	0.034	0.000372894
259	C23O3CHO	116.072	CO + HO2 + CH3CO3	O=COC(=O)C(=O)C	InChI=1S/C4H4O4/c1-3(6)4(7)8-2-5/h2H,1H3	J22	3.98e-06	0.000446184	0.0250979	0.0232182	0.000274571
260	C23O3ECHO	158.152	CO + C23O3EO2 + HO2	CCC(C=O)OC(=O)C(=O)C	InChI=1S/C7H10O4/c1-3-6(4-8)11-7(10)5(2)9/h4,6H,3H2,1-2H3	J15	1.99e-05	0.00223092	0.0296489	0.00762591	0.000324359
261	C23O3ECO3H	190.151	OH + C23O3EO2	OOC(=O)C(CC)OC(=O)C(=O)C	InChI=1S/C7H10O6/c1-3-5(7(10)13-11)12-6(9)4(2)8/h5,11H,3H2,1-2H3	J41	5.79e-06	0.000649096	0.0286943	0.00762411	0.000313916
262	C23O3ECOOH	162.141	C23O3EO + OH	CCC(OO)OC(=O)C(=O)C	InChI=1S/C6H10O5/c1-3-5(11-9)10-6(8)4(2)7/h5,9H,3H2,1-2H3	J41	5.79e-06	0.000649096	0.0291672	0.00762412	0.000319089
263	C23O3EHO	144.125	CH3CO3 + C2H5CO3	CCC(=O)OC(=O)C(=O)C	InChI=1S/C6H8O4/c1-3-5(8)10-6(9)4(2)7/h3H2,1-2H3	J22	3.98e-06	0.000446184	0.0290419	0.0076363	0.000317719
264	C23O3MCHO	144.125	CO + C23O3MO2 + HO2	O=CC(C)OC(=O)C(=O)C	InChI=1S/C6H8O4/c1-4(3-7)10-6(9)5(2)8/h3-4H,1-2H3	J15	1.99e-05	0.00223092	0.0308189	0.00762411	0.000337159
265	C23O3MCO3H	176.124	OH + C23O3MO2	OOC(=O)C(C)OC(=O)C(=O)C	InChI=1S/C6H8O6/c1-3(7)5(8)11-4(2)6(9)12-10/h4,10H,1-2H3	J41	5.79e-06	0.000649096	0.0286943	0.00762411	0.000313916
266	C23O3MCOOH	148.114	C23O3MO + OH	CC(OC(=O)C(=O)C)OO	InChI=1S/C5H8O5/c1-3(6)5(7)9-4(2)10-8/h4,8H,1-2H3	J41	5.79e-06	0.000649096	0.0345583	0.034	0.000378067
267	C2CL2OHOOH	146.957	C2CL2OHO + OH	OOC(Cl)C(O)Cl	InChI=1S/C2H4Cl2O3/c3-1(5)2(4)7-6/h1-2,5-6H	J41	5.79e-06	0.000649096	0.00053754	1.36143e-05	5.88069e-06
268	C2CL3HOOOH	181.402	C2CL3OHBO + OH	OOC(Cl)C(O)(Cl)Cl	InChI=1S/C2H3Cl3O3/c3-1(8-7)2(4,5)6/h1,6-7H	J41	5.79e-06	0.000649096	0.00053754	1.36143e-05	5.88069e-06
269	C2CL3OHOOH	181.402	C2CL3OHAO + OH	OOC(Cl)(Cl)C(O)Cl	InChI=1S/C2H3Cl3O3/c3-1(6)2(4,5)8-7/h1,6-7H	J41	5.79e-06	0.000649096	0.00053754	1.36143e-05	5.88069e-06
270	C2H5CHO	58.0791	C2H5O2 + HO2 + CO	CCC=O	InChI=1S/C3H6O/c1-2-3-4/h3H,2H2,1H3	J14	2.01e-05	0.00225334	0.00241	0.00231	2.63654e-05
271	C2H5NO3	91.066	C2H5O + NO2	CCON(=O)=O	InChI=1S/C2H5NO3/c1-2-6-3(4)5/h2H2,1H3	J52	1.36e-06	0.000152465	0.000154962	4.13992e-05	1.69528e-06
272	C2H5OOH	62.0678	C2H5O + OH	CCOO	InChI=1S/C2H6O2/c1-2-4-3/h3H,2H2,1H3	J41	5.79e-06	0.000649096	0.000558251	1.36143e-05	6.10727e-06
273	C2OHOCOOH	122.077	C3DIOLO2	OCC(O)C(=O)OO	InChI=1S/C3H6O5/c4-1-2(5)3(6)8-7/h2,4-5,7H,1H2	J41	5.79e-06	0.000649096	8.5369e-05	NaN	9.33937e-07
274	C312COCO3H	132.072	CHOCOCH2O2 + OH+ CHOCOCH2O2 + OH	OOC(=O)CC(=O)C=O	InChI=1S/C4H4O5/c5-2-3(6)1-4(7)9-8/h2,8H,1H2	J41+J34	0.00013079	0.0146624	0.0142941	0.00046023	0.000156378
275	C31CO3H	132.072	CHOOCHO + CO + HO2 + OH	O=COC=CC(=O)OO	InChI=1S/C4H4O5/c5-3-8-2-1-4(6)9-7/h1-3,7H	J41	5.79e-06	0.000649096	0.000607894	0.000115513	6.65036e-06
276	C32OH13CO	88.0621	GLYOX + HO2 + HO2 + CO	O=CC(O)C=O	InChI=1S/C3H4O3/c4-1-3(6)2-5/h1-3,6H	J15.*2	3.98e-05	0.00446184	0.00482	0.00326683	5.27308e-05
277	C33CO	86.0462	CO + HO2 + CO + CO + HO2	O=CC(=O)C=O	InChI=1S/C3H2O3/c4-1-3(6)2-5/h1-2H	J15.*2	3.98e-05	0.00446184	0.0162933	0.0025366	0.000178249
278	C3COCCHO	114.142	C3H7CO3 + HCOCH2O2+ PEN2ONE1O2 + CO + HO2	CCCC(=O)CC=O	InChI=1S/C6H10O2/c1-2-3-6(8)4-5-7/h5H,2-4H2,1H3	J22+J15	2.388e-05	0.0026771	0.002643	0.000431438	2.89144e-05
279	C3COCCO3H	146.141	PEN2ONE1O2 + OH	CCCC(=O)CC(=O)OO	InChI=1S/C6H10O4/c1-2-3-5(7)4-6(8)10-9/h9H,2-4H2,1H3	J41	5.79e-06	0.000649096	0.000518369	0.0004314	5.67096e-06
280	C3DBCO3H	102.089	CH3CHO + HO2 + CO + OH	CC=CC(=O)OO	InChI=1S/C4H6O3/c1-2-3-4(5)7-6/h2-3,6H,1H3	J41	5.79e-06	0.000649096	8.5369e-05	NaN	9.33937e-07
281	C3DIALOOH	104.061	C3DIALO + OH+ GLYOX + CO + HO2 + OH	OOC(C=O)C=O	InChI=1S/C3H4O4/c4-1-3(2-5)7-6/h1-3,6H	J41+J15.*2	4.559e-05	0.00511093	0.00537825	0.00326686	5.88381e-05
282	C3DIOLOOH	108.093	C3DIOLO + OH	OOCC(O)CO	InChI=1S/C3H8O4/c4-1-3(5)2-7-6/h3-6H,1-2H2	J41	5.79e-06	0.000649096	0.00053754	1.36143e-05	5.88069e-06
283	C3EDIALOH	116.115	EGLYOX + HO2 + HO2 + CO	CCC(O)(C=O)C=O	InChI=1S/C5H8O3/c1-2-5(8,3-6)4-7/h3-4,8H,2H2,1H3	J17.*2	0.00011	0.0123317	0.0033	6.03869e-06	3.6102e-05
284	C3EDIALOOH	132.115	C3EDIALO + OH+ EGLYOX + OH + HO2 + CO	CCC(OO)(C=O)C=O	InChI=1S/C5H8O4/c1-2-5(3-6,4-7)9-8/h3-4,8H,2H2,1H3	J41+J17.*2	0.00011579	0.0129808	0.00385825	1.48935e-05	4.22093e-05
285	C3EODBCO2H	128.126	HO2 + CO + HCOCO2H + C2H5CO3	CCC(=CC(=O)O)C=O	InChI=1S/C6H8O3/c1-2-5(4-7)3-6(8)9/h3-4H,2H2,1H3,(H,8,9)	J24	1.8e-06	0.000201792	0.000326281	0.000277531	3.56951e-06
286	C3H7CHO	72.1057	CH3CHO + C2H4+ NC3H7O2 + CO + HO2	CCCC=O	InChI=1S/C4H8O/c1-2-3-4-5/h4H,2-3H2,1H3	J16+J15	3.18e-05	0.00356499	0.00188	0.000113	2.05672e-05
287	C3M2COCO2H	128.126	CH3COCO2H + CH3CO3 + HO2 + CO+ CH3COCO2H + CH3CO3 + HO2 + CO	O=CC(=C(C)C(=O)O)C	InChI=1S/C6H8O3/c1-4(3-7)5(2)6(8)9/h3H,1-2H3,(H,8,9)	J18+J19	2.2e-06	0.000246634	0.000326281	0.000277531	3.56951e-06
288	C3M3CHONO3	147.129	C3ME3CHOO + NO2+ MPRBNO3O2 + CO + HO2	O=CCC(C)(C)ON(=O)=O	InChI=1S/C5H9NO4/c1-5(2,3-4-7)10-6(8)9/h4H,3H2,1-2H3	J55+J17	6.333e-05	0.0070997	0.0176071	0.00572939	0.000192622
289	C3M3CHOOOH	118.131	C3ME3CHOO + OH+ C3ME3CHOO + OH	O=CCC(C)(C)OO	InChI=1S/C5H10O3/c1-5(2,8-7)3-4-6/h4,7H,3H2,1-2H3	J41+J17	6.079e-05	0.00681495	0.00220825	1.42682e-05	2.41583e-05
290	C3M3OH2CHO	102.132	IPRCHO + HO2 + CO	O=CC(O)C(C)C	InChI=1S/C5H10O2/c1-4(2)5(7)3-6/h3-5,7H,1-2H3	J17	5.5e-05	0.00616586	0.00165	4.27e-06	1.8051e-05
291	C3M3OHCO3H	134.131	IPRCHO + HO2 + OH	OOC(=O)C(O)C(C)C	InChI=1S/C5H10O4/c1-3(2)4(6)5(7)9-8/h3-4,6,8H,1-2H3	J41	5.79e-06	0.000649096	8.5369e-05	NaN	9.33937e-07
292	C3MCOCO2H	114.099	HCOCO2H + HO2 + CO + CH3O2 + CO+ HCOCO2H + HO2 + CO + CH3O2 + CO	O=CC(=CC(=O)O)C	InChI=1S/C5H6O3/c1-4(3-6)2-5(7)8/h2-3H,1H3,(H,7,8)	J18+J19	2.2e-06	0.000246634	0.000326281	0.000277531	3.56951e-06
293	C3MDIALOH	102.089	MGLYOX + HO2 + CO + HO2	O=CC(C)(O)C=O	InChI=1S/C4H6O3/c1-4(7,2-5)3-6/h2-3,7H,1H3	J17.*2	0.00011	0.0123317	0.00376	0.000159806	4.11344e-05
294	C3MDIALOOH	118.088	C3MDIALO + OH+ MGLYOX + OH + HO2 + CO	OOC(C)(C=O)C=O	InChI=1S/C4H6O4/c1-4(2-5,3-6)8-7/h2-3,7H,1H3	J41+J17.*2	0.00011579	0.0129808	0.00431825	0.000160385	4.72417e-05
295	C3ME3CO3H	118.131	IC4H9O2 + OH	OOC(=O)CC(C)C	InChI=1S/C5H10O3/c1-4(2)3-5(6)8-7/h4,7H,3H2,1-2H3	J41	5.79e-06	0.000649096	8.5369e-05	NaN	9.33937e-07
296	C3MNO3CHO	147.129	M3BUTAL2O + NO2	O=CC(ON(=O)=O)C(C)C	InChI=1S/C5H9NO4/c1-4(2)5(3-7)10-6(8)9/h3-5H,1-2H3	J56.*10	0.000316	0.0354256	0.0176071	0.00572939	0.000192622
297	C3MNO3CO3H	179.128	IPRCHO + NO2 + OH+ IPRCHO + NO2 + OH	OOC(=O)C(ON(=O)=O)C(C)C	InChI=1S/C5H9NO6/c1-3(2)4(5(7)12-10)11-6(8)9/h3-4,10H,1-2H3	J41+J54	8.78e-06	0.000984295	0.000319314	3.89233e-06	3.4933e-06
298	C3NO3COOOH	151.075	C3NO3COO + OH+ C3NO3COO + OH	OOCC(=O)CON(=O)=O	InChI=1S/C3H5NO6/c5-3(2-10-8)1-9-4(6)7/h8H,1-2H2	J41+J56	3.739e-05	0.00419166	0.00455742	0.000867107	4.98582e-05
299	C413COOOH	118.088	CHOC3COO + OH+ CHOC3COO + OH+ CHOC3COO + OH	OOCC(=O)CC=O	InChI=1S/C4H6O4/c5-2-1-4(6)3-8-7/h2,7H,1,3H2	J41+J22+J15	2.967e-05	0.0033262	0.00289025	0.000118377	3.16193e-05
300	C41CO2H	116.115	CH3CO3 + C2H5O2	CC(C(=O)C)C(=O)O	InChI=1S/C5H8O3/c1-3(4(2)6)5(7)8/h3H,1-2H3,(H,7,8)	J22	3.98e-06	0.000446184	0.000194	7.13594e-05	2.12236e-06
301	C41CO3H	132.115	CH3CO3 + C2H5CO3+ MEKBO2 + OH	CC(C(=O)OO)C(=O)C	InChI=1S/C5H8O4/c1-3(4(2)6)5(7)9-8/h3,8H,1-2H3	J22+J41	9.77e-06	0.00109528	0.000388	0.000100917	4.24472e-06
302	C41OH	120.104	HOCH2CHO + GLYOX + HO2 + HO2	OCC(O)C(O)C=O	InChI=1S/C4H8O4/c5-1-3(7)4(8)2-6/h1,3-4,6-8H,2H2	J15	1.99e-05	0.00223092	0.00188	0.000113	2.05672e-05
303	C41OOH	136.103	C41O + OH	OCC(OO)C(O)C=O	InChI=1S/C4H8O5/c5-1-3(7)4(2-6)9-8/h1,3-4,6-8H,2H2	J41	5.79e-06	0.000649096	0.00241754	0.000113817	2.64479e-05
304	C42AOH	135.076	HO2 + CO + HO2 + NO3CH2CHO	O=CC(O)CON(=O)=O	InChI=1S/C3H5NO5/c5-1-3(6)2-9-4(7)8/h1,3,6H,2H2	J15	1.99e-05	0.00223092	0.0129081	0.00155763	0.000141215
305	C42CHO	118.131	HOIPRCHO + HO2 + HO2 + CO	OCC(C)C(O)C=O	InChI=1S/C5H10O3/c1-4(2-6)5(8)3-7/h3-6,8H,2H2,1H3	J15	1.99e-05	0.00223092	0.00165	4.27e-06	1.8051e-05
306	C42CO3H	150.13	HOIPRCHO + HO2 + OH	OCC(C)C(O)C(=O)OO	InChI=1S/C5H10O5/c1-3(2-6)4(7)5(8)10-9/h3-4,6-7,9H,2H2,1H3	J41	5.79e-06	0.000649096	8.5369e-05	NaN	9.33937e-07
307	C42MNO3OOH	179.171	C4ME2NO3O + OH	OOC(C)(C)C(C)(C)ON(=O)=O	InChI=1S/C6H13NO5/c1-5(2,11-7(8)9)6(3,4)12-10/h10H,1-4H3	J41	5.79e-06	0.000649096	0.000750971	3.50652e-05	8.21562e-06
308	C42NO33OOH	151.118	C42NO33O + OH	OOC(C)C(C)ON(=O)=O	InChI=1S/C4H9NO5/c1-3(4(2)10-8)9-5(6)7/h3-4,8H,1-2H3	J41	5.79e-06	0.000649096	0.000750094	2.33337e-05	8.20603e-06
309	C42OH	165.101	HO2 + CO + HO2 + C42AOH	O=CC(O)C(O)CON(=O)=O	InChI=1S/C4H7NO6/c6-1-3(7)4(8)2-11-5(9)10/h1,3-4,7-8H,2H2	J15	1.99e-05	0.00223092	0.0144816	0.00400026	0.000158429
310	C42OOH	181.101	C42O + OH+ HO2 + CO + HO2 + NMGLYOX	OOC(CON(=O)=O)C(O)C=O	InChI=1S/C4H7NO7/c6-1-3(7)4(12-10)2-11-5(8)9/h1,3-4,7,10H,2H2	J41+J15	2.569e-05	0.00288002	0.0150192	0.00400028	0.00016431
311	C43NO34OOH	151.118	C43NO34O + OH	OOCC(CC)ON(=O)=O	InChI=1S/C4H9NO5/c1-2-4(3-9-8)10-5(6)7/h4,8H,2-3H2,1H3	J41	5.79e-06	0.000649096	0.000750094	2.33337e-05	8.20603e-06
312	C43NO3CO3H	179.128	MEK + NO2 + OH	OOC(=O)C(C)(CC)ON(=O)=O	InChI=1S/C5H9NO6/c1-3-5(2,4(7)11-10)12-6(8)9/h10H,3H2,1-2H3	J41	5.79e-06	0.000649096	0.000319314	3.89233e-06	3.4933e-06
313	C43OHCOCHO	130.142	HO3C4CO3 + HO2 + CO	CCC(O)CC(=O)C=O	InChI=1S/C6H10O3/c1-2-5(8)3-6(9)4-7/h4-5,8H,2-3H2,1H3	J34	0.000125	0.0140133	0.0142087	0.00046023	0.000155444
314	C44OOH	134.087	C44O + OH	O=CCC(OO)C(=O)O	InChI=1S/C4H6O5/c5-2-1-3(9-8)4(6)7/h2-3,8H,1H2,(H,6,7)	J41	5.79e-06	0.000649096	0.00243825	0.000113817	2.66745e-05
315	C45IC5CHO	128.126	IPRCO3 + CO + CO + HO2+ IPRCO3 + CO + CO + HO2	O=CC(=O)C(=O)C(C)C	InChI=1S/C6H8O3/c1-4(2)6(9)5(8)3-7/h3-4H,1-2H3	J35+J34	0.000393	0.0440578	0.0308189	0.00762411	0.000337159
316	C45NO3	117.103	C45O + NO2	[O-][N+](=O)OCC(=C)C	InChI=1S/C4H7NO3/c1-4(2)3-8-5(6)7/h1,3H2,2H3	J53	1.79e-06	0.000200671	0.000191843	1.89503e-05	2.09876e-06
317	C45OOH	88.1051	C45O + OH	CC(=C)COO	InChI=1S/C4H8O2/c1-4(2)3-6-5/h5H,1,3H2,2H3	J41	5.79e-06	0.000649096	0.000558251	1.36143e-05	6.10727e-06
318	C46CO3H	132.115	HOC2H4CO3 + HCHO + OH	OCCC(=C)C(=O)OO	InChI=1S/C5H8O4/c1-4(2-3-6)5(7)9-8/h6,8H,1-3H2	J41	5.79e-06	0.000649096	8.5369e-05	NaN	9.33937e-07
319	C47CHO	177.112	GLYOX + MGLYOX + HO2 + NO2	O=CC(C(C=O)(O)C)O[N+](=O)[O-]	InChI=1S/C5H7NO6/c1-5(9,3-8)4(2-7)12-6(10)11/h2-4,9H,1H3	J56.*10	0.000316	0.0354256	0.0192571	0.00572939	0.000210673
320	C47CO3H	209.111	GLYOX + CH3COCO3H + HO2 + NO2	O=CC(C(C(=O)OO)(O)C)O[N+](=O)[O-]	InChI=1S/C5H7NO8/c1-5(9,4(8)14-12)3(2-7)13-6(10)11/h2-3,9,12H,1H3	J56.*10	0.000316	0.0354256	0.007105	0.00318905	7.77287e-05
321	C47PAN	254.108	C47CO3 + NO2	O=CC(C(C(=O)OO[N+](=O)[O-])(O)C)O[N+](=O)[O-]	InChI=1S/C5H6N2O10/c1-5(10,3(2-8)15-6(11)12)4(9)16-17-7(13)14/h2-3,10H,1H3	J56.*10	0.000316	0.0354256	0.007105	0.00318905	7.77287e-05
322	C4ALDB	70.0898	CH3CHO + CO + HO2 + CO + HO2	CC=CC=O	InChI=1S/C4H6O/c1-2-3-4-5/h2-4H,1H3	J18.*1.44	1.584e-06	0.000177577	0.000522525	0.000115513	5.71642e-06
323	C4CHOAOOH	118.131	C4CHO2O + OH	CCCC(OO)C=O	InChI=1S/C5H10O3/c1-2-3-5(4-6)8-7/h4-5,7H,2-3H2,1H3	J41	5.79e-06	0.000649096	0.00220825	1.42682e-05	2.41583e-05
324	C4CHOBNO3	147.129	C4CHOBO + NO2+ C4CHOBO + NO2	O=CCC(CC)ON(=O)=O	InChI=1S/C5H9NO4/c1-2-5(3-4-7)10-6(8)9/h4-5H,2-3H2,1H3	J54+J15	2.289e-05	0.00256612	0.0176071	0.00572939	0.000192622
325	C4CHOBOOH	118.131	C4CHOBO + OH+ C4CHOBO + OH	CCC(CC=O)OO	InChI=1S/C5H10O3/c1-2-5(8-7)3-4-6/h4-5,7H,2-3H2,1H3	J41+J15	2.569e-05	0.00288002	0.00165	4.27e-06	1.8051e-05
326	C4CO2DCO3H	144.082	HO2 + CO + C33CO + OH+ HO2 + CO + C33CO + OH	OOC(=O)C=CC(=O)C=O	InChI=1S/C5H4O5/c6-3-4(7)1-2-5(8)10-9/h1-3,9H	J41+J34	0.00013079	0.0146624	0.116717	0.062826	0.00127688
327	C4CO2OOH	118.088	C4CO2O + OH+ CH3CO3 + GLYOX + OH+ HO2 + CO + MGLYOX + OH	OOC(C=O)C(=O)C	InChI=1S/C4H6O4/c1-3(6)4(2-5)8-7/h2,4,7H,1H3	J41+J22+J17	6.477e-05	0.00726114	0.00289025	0.000118377	3.16193e-05
328	C4CODIAL	100.073	CHOCOCH2O2 + HO2 + CO+ HCOCH2CO3 + HO2 + CO	O=CCC(=O)C=O	InChI=1S/C4H4O3/c5-2-1-4(7)3-6/h2-3H,1H2	J15+J34	0.0001449	0.0162442	0.0160887	0.000473899	0.000176011
329	C4COMEOH	116.158	HOCH2CO3 + NC4H9O2	CCCCC(=O)CO	InChI=1S/C6H12O2/c1-2-3-4-6(8)5-7/h7H,2-5H2,1H3	J22	3.98e-06	0.000446184	0.000433	0.0004314	4.73702e-06
330	C4COMOH3OH	132.158	HO3C4O2 + HOCH2CO3	CCC(O)CC(=O)CO	InChI=1S/C6H12O3/c1-2-5(8)3-6(9)4-7/h5,7-8H,2-4H2,1H3	J22	3.98e-06	0.000446184	0.000433	0.0004314	4.73702e-06
331	C4COMOHOOH	148.157	C4COMOH3O + OH+ C4COMOH3O + OH	CCC(OO)CC(=O)CO	InChI=1S/C6H12O4/c1-2-6(10-9)3-5(8)4-7/h6-7,9H,2-4H2,1H3	J41+J22	9.77e-06	0.00109528	0.00097054	0.000431615	1.06177e-05
332	C4CONO3CO	147.086	C4CONO3O2 + CO + HO2+ C4CO2O + NO2	O=CC(ON(=O)=O)C(=O)C	InChI=1S/C4H5NO5/c1-3(7)4(2-6)10-5(8)9/h2,4H,1H3	J34+J55	0.00013333	0.0149472	0.00636667	0.00222946	6.96513e-05
333	C4CONO3OOH	165.101	C4CONO3O + OH+ C4CONO3O + OH	OOC(C)C(C=O)ON(=O)=O	InChI=1S/C4H7NO6/c1-3(11-9)4(2-6)10-5(7)8/h2-4,9H,1H3	J17+J41	6.079e-05	0.00681495	0.0150399	0.00400028	0.000164536
334	C4DBDIKET	112.126	MGLYOX + CH3CO3 + HO2 + CO	CC(=O)C=CC(=O)C	InChI=1S/C6H8O2/c1-5(7)3-4-6(2)8/h3-4H,1-2H3	J4.*0.0057	5.0844e-05	0.00569994	0.000767439	0.000453772	8.39578e-06
335	C4DBM2CO3H	172.135	CO23C3CHO + CH3CO3 + OH+ CO23C3CHO + CH3CO3 + OH	OOC(=O)C(=C(C)C(=O)C=O)C	InChI=1S/C7H8O5/c1-4(6(9)3-8)5(2)7(10)12-11/h3,11H,1-2H3	J41+J34	0.00013079	0.0146624	0.00145981	0.00021762	1.59703e-05
336	C4DBMECO3H	186.162	C5CO23CHO + CH3CO3 + OH+ C5CO23CHO + CH3CO3 + OH	OOC(=O)C(=C(CC)C(=O)C=O)C	InChI=1S/C8H10O5/c1-3-6(7(10)4-9)5(2)8(11)13-12/h4,12H,3H2,1-2H3	J41+J34	0.00013079	0.0146624	0.00225781	0.000551971	2.47004e-05
337	C4ECO2OOH	146.141	C4ECO2O + OH+ CH3CO3 + EGLYOX + OH+ CO23C5 + OH + HO2 + CO	CCC(OO)(C=O)C(=O)C	InChI=1S/C6H10O4/c1-3-6(4-7,10-9)5(2)8/h4,9H,3H2,1-2H3	J41+J22+J17	6.477e-05	0.00726114	0.00320125	0.000431653	3.50217e-05
338	C4H9CHO	86.1323	NC4H9O2 + HO2 + CO	CCCCC=O	InChI=1S/C5H10O/c1-2-3-4-5-6/h5H,2-4H2,1H3	J15	1.99e-05	0.00223092	0.00165	4.27e-06	1.8051e-05
339	C4M22CONO3	161.113	CH3CO3 + MGLYOX + NO2	O=CC(C)(ON(=O)=O)C(=O)C	InChI=1S/C5H7NO5/c1-4(8)5(2,3-7)11-6(9)10/h3H,1-2H3	J56.*10	0.000316	0.0354256	0.007105	0.00318905	7.77287e-05
340	C4M2AL2OH	132.115	CO2H3CHO + HO2 + CO + HO2	O=CC(O)C(C)(O)C=O	InChI=1S/C5H8O4/c1-5(9,3-7)4(8)2-6/h2-4,8-9H,1H3	J17.*2	0.00011	0.0123317	0.0033	6.03869e-06	3.6102e-05
341	C4M2ALOHNO3	177.112	MGLYOX + GLYOX + HO2 + NO2	O=CC(O)C(C)(C=O)ON(=O)=O	InChI=1S/C5H7NO6/c1-5(3-8,4(9)2-7)12-6(10)11/h2-4,9H,1H3	J56.*10	0.000316	0.0354256	0.0192571	0.00572939	0.000210673
342	C4M2NO3ONE	147.129	MIPKAO + NO2	O=N(=O)OC(C)(C)C(=O)C	InChI=1S/C5H9NO4/c1-4(7)5(2,3)10-6(8)9/h1-3H3	J56.*1.6	5.056e-05	0.0056681	0.005455	0.00318905	5.96777e-05
343	C4M2NO3OOH	165.144	C4M2NO33O + OH	OOC(C)(C)C(C)ON(=O)=O	InChI=1S/C5H11NO5/c1-4(10-6(7)8)5(2,3)11-9/h4,9H,1-3H3	J41	5.79e-06	0.000649096	0.000792196	1.41598e-05	8.66662e-06
344	C4M3NO3ONE	147.129	IPRCOMO + NO2	O=N(=O)OCC(=O)C(C)C	InChI=1S/C5H9NO4/c1-4(2)5(7)3-10-6(8)9/h4H,3H2,1-2H3	J56	3.16e-05	0.00354256	0.005455	0.00318905	5.96777e-05
345	C4MALOHOOH	148.114	C4M2ALOHO + OH+ CO2H3CHO + HO2 + CO + OH	O=CC(O)C(C)(OO)C=O	InChI=1S/C5H8O5/c1-5(3-7,10-9)4(8)2-6/h2-4,8-9H,1H3	J41+J17.*2	0.00011579	0.0129808	0.00383754	1.48935e-05	4.19827e-05
346	C4MCNO3OOH	179.128	MC4CONO3O + OH	OOCC(C)(ON(=O)=O)C(=O)C	InChI=1S/C5H9NO6/c1-4(7)5(2,3-11-10)12-6(8)9/h10H,3H2,1-2H3	J41	5.79e-06	0.000649096	0.00601325	0.00318908	6.5785e-05
347	C4MCO2OH	116.115	BIACET + HO2 + HO2 + CO+ MGLYOX + HO2 + CH3CO3	O=CC(C)(O)C(=O)C	InChI=1S/C5H8O3/c1-4(7)5(2,8)3-6/h3,8H,1-2H3	J17+J22	5.898e-05	0.00661204	0.001844	7.1487e-05	2.01734e-05
348	C4MCO2OOH	132.115	BIACET + OH + HO2 + CO+ C4MCO2O + OH+ CH3CO3 + MGLYOX + OH	OOC(C)(C=O)C(=O)C	InChI=1S/C5H8O4/c1-4(7)5(2,3-6)9-8/h3,8H,1-2H3	J17+J41+J22	6.477e-05	0.00726114	0.00240225	7.27719e-05	2.62806e-05
349	C4MDIAL	98.0999	C3MCODBCO3 + HO2 + CO+ MC3CODBCO3 + HO2 + CO+ PXYFUONE	O=CC=C(C)C=O	InChI=1S/C5H6O2/c1-5(4-7)2-3-6/h2-4H,1H3	J4.*0.2.*0.3+J4.*0.2.*0.3+J4.*0.2.*0.4	0.001784	0.199998	0.116632	0.062826	0.00127595
350	C4ME2OHOOH	134.174	C4ME2OHO + OH	OOC(C)(C)C(C)(C)O	InChI=1S/C6H14O3/c1-5(2,7)6(3,4)9-8/h7-8H,1-4H3	J41	5.79e-06	0.000649096	0.00053754	1.36143e-05	5.88069e-06
351	C4MNO31OOH	165.144	C4M3NO31O + OH	OOC(CON(=O)=O)C(C)C	InChI=1S/C5H11NO5/c1-4(2)5(11-9)3-10-6(7)8/h4-5,9H,3H2,1-2H3	J41	5.79e-06	0.000649096	0.000792196	1.41598e-05	8.66662e-06
352	C4MNO32OOH	165.144	C4M3NO32O + OH	OOCC(ON(=O)=O)C(C)C	InChI=1S/C5H11NO5/c1-4(2)5(3-10-9)11-6(7)8/h4-5,9H,3H2,1-2H3	J41	5.79e-06	0.000649096	0.000792196	1.41598e-05	8.66662e-06
353	C4MOHOCO3H	162.141	C3H7CO3 + HCOCO3H + HO2+ IPRGLYOX + HO2 + CO + OH	OOC(=O)C(O)C(=O)C(C)C	InChI=1S/C6H10O5/c1-3(2)4(7)5(8)6(9)11-10/h3,5,8,10H,1-2H3	J22+J41	9.77e-06	0.00109528	0.000518369	0.0004314	5.67096e-06
354	C4NO32MOOH	165.144	C4NO32M2O + OH	CCC(C)(OO)CON(=O)=O	InChI=1S/C5H11NO5/c1-3-5(2,11-9)4-10-6(7)8/h9H,3-4H2,1-2H3	J41	5.79e-06	0.000649096	0.000792196	1.41598e-05	8.66662e-06
355	C4NO3CHO	147.129	C42CHO2O + NO2+ MEK + NO2 + HO2 + CO	CCC(C)(C=O)ON(=O)=O	InChI=1S/C5H9NO4/c1-3-5(2,4-7)10-6(8)9/h4H,3H2,1-2H3	J56.*10+J15	0.0003359	0.0376566	0.0176071	0.00572939	0.000192622
356	C4NO3CO3H	179.128	C3H7CHO + NO2 + OH	CCCC(ON(=O)=O)C(=O)OO	InChI=1S/C5H9NO6/c1-2-3-4(5(7)12-10)11-6(8)9/h4,10H,2-3H2,1H3	J41	5.79e-06	0.000649096	0.005455	0.00318905	5.96777e-05
357	C4NO3COOOH	165.101	C4CONO3O + OH+ C4CONO3O + OH	OOC(C=O)C(C)ON(=O)=O	InChI=1S/C4H7NO6/c1-3(10-5(7)8)4(2-6)11-9/h2-4,9H,1H3	J17+J41	6.079e-05	0.00681495	0.0150399	0.00400028	0.000164536
358	C4NO3M1OOH	165.144	C4NO32M1O + OH	OOCC(C)(CC)ON(=O)=O	InChI=1S/C5H11NO5/c1-3-5(2,4-10-9)11-6(7)8/h9H,3-4H2,1-2H3	J41	5.79e-06	0.000649096	0.000792196	1.41598e-05	8.66662e-06
359	C4NO3M2OOH	165.144	C4M2NO32O + OH	OOC(C)C(C)(C)ON(=O)=O	InChI=1S/C5H11NO5/c1-4(10-9)5(2,3)11-6(7)8/h4,9H,1-3H3	J41	5.79e-06	0.000649096	0.000792196	1.41598e-05	8.66662e-06
360	C4OCCOHCOH	104.105	CH3CHOHCHO + CO + HO2 + HO2	CC(O)C(O)C=O	InChI=1S/C4H8O3/c1-3(6)4(7)2-5/h2-4,6-7H,1H3	J17	5.5e-05	0.00616586	0.00188	0.000113	2.05672e-05
361	C4OCCOHNO3	149.102	CHOPRNO3 + HO2 + CO	O=CC(O)C(C)ON(=O)=O	InChI=1S/C4H7NO5/c1-3(4(7)2-6)10-5(8)9/h2-4,7H,1H3	J17	5.5e-05	0.00616586	0.0144816	0.00400026	0.000158429
362	C4OCCOHOOH	120.104	C4OCCOHCO + OH+ C4OCCOHCO + OH	OOC(C)C(O)C=O	InChI=1S/C4H8O4/c1-3(8-7)4(6)2-5/h2-4,6-7H,1H3	J41+J17	6.079e-05	0.00681495	0.00241754	0.000113817	2.64479e-05
363	C4OH2CO3H	150.13	IBUTALOH + HO2 + OH	OOC(=O)C(O)C(C)(C)O	InChI=1S/C5H10O5/c1-5(2,8)3(6)4(7)10-9/h3,6,8-9H,1-2H3	J41	5.79e-06	0.000649096	8.5369e-05	NaN	9.33937e-07
364	C4OHCHO	102.132	C3H7CHO + CO + HO2 + HO2	CCCC(O)C=O	InChI=1S/C5H10O2/c1-2-3-5(7)4-6/h4-5,7H,2-3H2,1H3	J15	1.99e-05	0.00223092	0.00165	4.27e-06	1.8051e-05
365	C4OHCO3H	134.131	C3H7CHO + HO2 + OH	CCCC(O)C(=O)OO	InChI=1S/C5H10O4/c1-2-3-4(6)5(7)9-8/h4,6,8H,2-3H2,1H3	J41	5.79e-06	0.000649096	8.5369e-05	NaN	9.33937e-07
366	C510OOH	195.127	C510O + OH	O=CC(O)C(C)(OO)CON(=O)=O	InChI=1S/C5H9NO7/c1-5(13-11,4(8)2-7)3-12-6(9)10/h2,4,8,11H,3H2,1H3	J41	5.79e-06	0.000649096	0.0181446	0.0057294	0.000198502
367	C511CO3H	160.125	C511O2 + OH+ C511O2 + OH	O=CCC(C(=O)C)C(=O)OO	InChI=1S/C6H8O5/c1-4(8)5(2-3-7)6(9)11-10/h3,5,10H,2H2,1H3	J41+J15	2.569e-05	0.00288002	0.00272837	0.000431438	2.98484e-05
368	C511OOH	132.115	C511O + OH+ C511O + OH	O=CCC(OO)C(=O)C	InChI=1S/C5H8O4/c1-4(7)5(9-8)2-3-6/h3,5,8H,2H2,1H3	J41+J15	2.569e-05	0.00288002	0.00240225	7.27719e-05	2.62806e-05
369	C5124COOOH	146.098	C5124COO + OH+ C5124COO + OH+ C5124COO + OH	OOCC(=O)CC(=O)C=O	InChI=1S/C5H6O5/c6-2-4(7)1-5(8)3-10-9/h2,9H,1,3H2	J41+J22+J34	0.00013477	0.0151086	0.014961	0.000465928	0.000163673
370	C512CO2H	144.125	C512O2 + HO2	O=CCC(=O)CCC(=O)O	InChI=1S/C6H8O4/c7-4-3-5(8)1-2-6(9)10/h4H,1-3H2,(H,9,10)	J15	1.99e-05	0.00223092	0.002643	0.000431438	2.89144e-05
371	C512CO3H	160.125	C512O2 + OH+ C512O2 + OH	OOC(=O)CCC(=O)CC=O	InChI=1S/C6H8O5/c7-4-3-5(8)1-2-6(9)11-10/h4,10H,1-3H2	J41+J15	2.569e-05	0.00288002	0.00272837	0.000431438	2.98484e-05
372	C512NO3	161.113	C512O + NO2+ C512O + NO2	O=CCC(=O)CCON(=O)=O	InChI=1S/C5H7NO5/c7-3-1-5(8)2-4-11-6(9)10/h3H,1-2,4H2	J53+J15	2.169e-05	0.00243159	0.007105	0.00318905	7.77287e-05
373	C512OH	116.115	C512O + HO2	OCCC(=O)CC=O	InChI=1S/C5H8O3/c6-3-1-5(8)2-4-7/h3,7H,1-2,4H2	J15	1.99e-05	0.00223092	0.001844	7.1487e-05	2.01734e-05
374	C512OOH	132.115	C512O + OH+ C512O + OH	OOCCC(=O)CC=O	InChI=1S/C5H8O4/c6-3-1-5(7)2-4-9-8/h3,8H,1-2,4H2	J41+J15	2.569e-05	0.00288002	0.00240225	7.27719e-05	2.62806e-05
375	C5134CO2OH	130.099	CO23C3CHO + HO2 + CO + HO2+ CO23C3CHO + HO2 + CO + HO2	O=CC(O)C(=O)C(=O)C	InChI=1S/C5H6O4/c1-3(7)5(9)4(8)2-6/h2,4,8H,1H3	J15+J35	0.0002879	0.0322755	0.03565	0.034	0.000390011
376	C513CO	130.099	HOC2H4CO3 + HO2 + CO + CO+ HOC2H4CO3 + HO2 + CO + CO	OCCC(=O)C(=O)C=O	InChI=1S/C5H6O4/c6-2-1-4(8)5(9)3-7/h3,6H,1-2H2	J34+J35	0.000393	0.0440578	0.03565	0.034	0.000390011
377	C513OH	132.115	C513O + HO2	OC(C=O)C(=O)CCO	InChI=1S/C5H8O4/c6-2-1-4(8)5(9)3-7/h3,5-6,9H,1-2H2	J15	1.99e-05	0.00223092	0.002038	0.000101008	2.22957e-05
378	C513OOH	148.114	C513O + OH+ C513O + OH	OCCC(=O)C(OO)C=O	InChI=1S/C5H8O5/c6-2-1-4(8)5(3-7)10-9/h3,5-6,9H,1-2H2	J41+J15	2.569e-05	0.00288002	0.00238154	7.27719e-05	2.6054e-05
379	C514CO23OH	132.115	CO2H3CHO + HO2 + CO + HO2+ CO2H3CHO + HO2 + CO + HO2	O=CC(O)C(O)C(=O)C	InChI=1S/C5H8O4/c1-3(7)5(9)4(8)2-6/h2,4-5,8-9H,1H3	J15+J22	2.388e-05	0.0026771	0.001844	7.1487e-05	2.01734e-05
380	C514NO3	161.113	C514O + NO2+ C514O + NO2	O=CCC(CC=O)ON(=O)=O	InChI=1S/C5H7NO5/c7-3-1-5(2-4-8)11-6(9)10/h3-5H,1-2H2	J54+J15.*2	4.279e-05	0.00479704	0.0192571	0.00572939	0.000210673
381	C514OH	116.115	C514O + HO2	O=CCC(O)CC=O	InChI=1S/C5H8O3/c6-3-1-5(8)2-4-7/h3-5,8H,1-2H2	J15.*2	3.98e-05	0.00446184	0.0033	6.03869e-06	3.6102e-05
382	C514OOH	132.115	C514O + OH+ C514O + OH	O=CCC(OO)CC=O	InChI=1S/C5H8O4/c6-3-1-5(9-8)2-4-7/h3-5,8H,1-2H2	J41+J15.*2	4.559e-05	0.00511093	0.00385825	1.48935e-05	4.22093e-05
383	C515CHO	142.109	C515O2 + HO2 + CO+ HCOCH2CO3 + HCOCH2CO3	O=CCC(=O)C(=O)CC=O	InChI=1S/C6H6O4/c7-3-1-5(9)6(10)2-4-8/h3-4H,1-2H2	J15.*2+J35	0.0003078	0.0345064	0.0330289	0.00762411	0.000361337
384	C515CO	128.083	HO2 + CO + CO + HCOCH2CO3+ HO2 + CO + CO + HCOCH2CO3	O=CCC(=O)C(=O)C=O	InChI=1S/C5H4O4/c6-2-1-4(8)5(9)3-7/h2-3H,1H2	J34+J35	0.000393	0.0440578	0.0373	0.034	0.000408062
385	C515CO3H	174.108	C515O2 + OH+ C515O2 + OH	OOC(=O)CC(=O)C(=O)CC=O	InChI=1S/C6H6O6/c7-2-1-4(8)5(9)3-6(10)12-11/h2,11H,1,3H2	J41+J35	0.00027379	0.0306936	0.0309043	0.00762411	0.000338093
386	C515OOH	146.098	C515O + OH+ C515O + OH	OOCC(=O)C(=O)CC=O	InChI=1S/C5H6O5/c6-2-1-4(7)5(8)3-10-9/h2,9H,1,3H2	J41+J35	0.00027379	0.0306936	0.0362083	0.034	0.000396118
387	C516OOH	164.113	C516O + OH+ C516O + OH	OCC(OO)CC(=O)C(=O)O	InChI=1S/C5H8O6/c6-2-3(11-10)1-4(7)5(8)9/h3,6,10H,1-2H2,(H,8,9)	J22+J41	9.77e-06	0.00109528	0.0191375	0.016	0.000209365
388	C517CHO	130.142	C517O2 + CO + HO2	O=CCC(CO)C(=O)C	InChI=1S/C6H10O3/c1-5(9)6(4-8)2-3-7/h3,6,8H,2,4H2,1H3	J15	1.99e-05	0.00223092	0.002643	0.000431438	2.89144e-05
389	C517CO3H	162.141	C517O2 + OH	OCC(CC(=O)OO)C(=O)C	InChI=1S/C6H10O5/c1-4(8)5(3-7)2-6(9)11-10/h5,7,10H,2-3H2,1H3	J41	5.79e-06	0.000649096	0.000866	0.000610092	9.47404e-06
390	C517NO3	163.129	C517O + NO2	OCC(CO[N+](=O)[O-])C(=O)C	InChI=1S/C5H9NO5/c1-4(8)5(2-7)3-11-6(9)10/h5,7H,2-3H2,1H3	J53	1.79e-06	0.000200671	0.005455	0.00318905	5.96777e-05
391	C517OOH	134.131	C517O + OH	OOCC(CO)C(=O)C	InChI=1S/C5H10O4/c1-4(7)5(2-6)3-9-8/h5-6,8H,2-3H2,1H3	J41	5.79e-06	0.000649096	0.00073154	7.26465e-05	8.00305e-06
392	C518CHO	114.142	ISOPDO2 + CO + HO2	CC(=C)C(CO)C=O	InChI=1S/C6H10O2/c1-5(2)6(3-7)4-8/h3,6,8H,1,4H2,2H3	J15	1.99e-05	0.00223092	0.000326281	0.000277531	3.56951e-06
393	C518CO3H	146.141	ISOPDO2 + OH	OCC(C(=C)C)C(=O)OO	InChI=1S/C6H10O4/c1-4(2)5(3-7)6(8)10-9/h5,7,9H,1,3H2,2H3	J41	5.79e-06	0.000649096	8.5369e-05	NaN	9.33937e-07
394	C519CO3H	162.141	C519O2 + OH+ C519O2 + OH	OCCC(C(=O)C)C(=O)OO	InChI=1S/C6H10O5/c1-4(8)5(2-3-7)6(9)11-10/h5,7,10H,2-3H2,1H3	J41+J22	9.77e-06	0.00109528	0.000518369	0.0004314	5.67096e-06
395	C519OOH	134.131	C519O + OH+ CH3CO3 + HOC2H4CHO + OH	OCCC(OO)C(=O)C	InChI=1S/C5H10O4/c1-4(7)5(9-8)2-3-6/h5-6,8H,2-3H2,1H3	J41+J22	9.77e-06	0.00109528	0.00073154	7.26465e-05	8.00305e-06
396	C51CO3H	146.141	MIPKBO2 + OH+ MIPKBO2 + OH	CC(CC(=O)OO)C(=O)C	InChI=1S/C6H10O4/c1-4(5(2)7)3-6(8)10-9/h4,9H,3H2,1-2H3	J41+J22	9.77e-06	0.00109528	0.000866	0.000610092	9.47404e-06
397	C51NO3	163.129	C51O + NO2	OCC(CC(=O)C)ON(=O)=O	InChI=1S/C5H9NO5/c1-4(8)2-5(3-7)11-6(9)10/h5,7H,2-3H2,1H3	J22	3.98e-06	0.000446184	0.005455	0.00318905	5.96777e-05
398	C51NO324CO	161.113	C5CO24O + NO2+ CH3CO3 + C3NO3COO2	CC(=O)CC(=O)CON(=O)=O	InChI=1S/C5H7NO5/c1-4(7)2-5(8)3-11-6(9)10/h2-3H2,1H3	J56+J22	3.558e-05	0.00398875	0.005649	0.00318985	6.18001e-05
399	C51NO32CO	147.129	PEN2ONE1O + NO2	CCCC(=O)CON(=O)=O	InChI=1S/C5H9NO4/c1-2-3-5(7)4-10-6(8)9/h2-4H2,1H3	J56.*1.6	5.056e-05	0.0056681	0.005455	0.00318905	5.96777e-05
400	C51NO32OOH	165.144	C51NO32O + OH	CCCC(OO)CON(=O)=O	InChI=1S/C5H11NO5/c1-2-3-5(11-9)4-10-6(7)8/h5,9H,2-4H2,1H3	J41	5.79e-06	0.000649096	0.000792196	1.41598e-05	8.66662e-06
401	C51OH2CO	102.132	HOCH2CO3 + NC3H7O2	CCCC(=O)CO	InChI=1S/C5H10O2/c1-2-3-5(7)4-6/h6H,2-4H2,1H3	J22	3.98e-06	0.000446184	0.000194	7.13594e-05	2.12236e-06
402	C51OH2OOH	120.147	PE1ENEAO + OH	CCCC(CO)OO	InChI=1S/C5H12O3/c1-2-3-5(4-6)8-7/h5-7H,2-4H2,1H3	J41	5.79e-06	0.000649096	0.00053754	1.36143e-05	5.88069e-06
403	C51OOH	134.131	C51O + OH+ C51O + OH	OCC(OO)CC(=O)C	InChI=1S/C5H10O4/c1-4(7)2-5(3-6)9-8/h5-6,8H,2-3H2,1H3	J41+J22	9.77e-06	0.00109528	0.00073154	7.26465e-05	8.00305e-06
404	C520OH	132.115	BIACETOH + CO + HO2 + HO2+ HOCH2COCHO + CH3CO3 + HO2	OCC(O)(C=O)C(=O)C	InChI=1S/C5H8O4/c1-4(8)5(9,2-6)3-7/h2,7,9H,3H2,1H3	J15+J22	2.388e-05	0.0026771	0.001844	7.1487e-05	2.01734e-05
405	C520OOH	148.114	BIACETOH + CO + HO2 + OH+ C520O + OH+ HOCH2COCHO + CH3CO3 + OH	OCC(OO)(C=O)C(=O)C	InChI=1S/C5H8O5/c1-4(8)5(2-6,3-7)10-9/h2,7,9H,3H2,1H3	J15+J41+J22	2.967e-05	0.0033262	0.00238154	7.27719e-05	2.6054e-05
406	C521OH	132.115	HOCH2CO3 + HOC2H4CO3	OCCC(=O)C(=O)CO	InChI=1S/C5H8O4/c6-2-1-4(8)5(9)3-7/h6-7H,1-3H2	J35	0.000268	0.0300445	0.034	0.034	0.00037196
407	C521OOH	148.114	C521O + OH+ C521O + OH	OCCC(=O)C(=O)COO	InChI=1S/C5H8O5/c6-2-1-4(7)5(8)3-10-9/h6,9H,1-3H2	J41+J35	0.00027379	0.0306936	0.0345375	0.034	0.000377841
408	C524CO	116.115	HOCH2CO3 + HOCH2CO3 + HCHO	OCC(=O)C(=C)CO	InChI=1S/C5H8O3/c1-4(2-6)5(8)3-7/h6-7H,1-3H2	J24	1.8e-06	0.000201792	0.000334439	0.000140722	3.65876e-06
409	C524NO3	163.129	C524O + NO2	OCC(=C)C(CO)ON(=O)=O	InChI=1S/C5H9NO5/c1-4(2-7)5(3-8)11-6(9)10/h5,7-8H,1-3H2	J54	2.99e-06	0.000335198	1.33512e-05	3.89233e-06	1.46063e-07
410	C524OOH	134.131	C524O + OH	OCC(=C)C(CO)OO	InChI=1S/C5H10O4/c1-4(2-6)5(3-7)9-8/h5-8H,1-3H2	J41	5.79e-06	0.000649096	0.00053754	1.36143e-05	5.88069e-06
411	C525OOH	166.129	C525O + OH	OCC(=O)C(CO)(CO)OO	InChI=1S/C5H10O6/c6-1-4(9)5(2-7,3-8)11-10/h6-8,10H,1-3H2	J41	5.79e-06	0.000649096	0.00073154	7.26465e-05	8.00305e-06
412	C526NO3	195.127	C526O + NO2	OCC(C(O[N+](=O)[O-])(C=O)C)OO	InChI=1S/C5H9NO7/c1-5(3-8,13-6(9)10)4(2-7)12-11/h3-4,7,11H,2H2,1H3	J56.*10	0.000316	0.0354256	0.0181446	0.0057294	0.000198502
413	C526OOH	166.129	HMVKBOOH + CO + OH + HO2+ MGLYOX + HOCH2CHO + OH + OH	OCC(C(C=O)(OO)C)OO	InChI=1S/C5H10O6/c1-5(3-7,11-9)4(2-6)10-8/h3-4,6,8-9H,2H2,1H3	J17+J41.*2	6.658e-05	0.00746405	0.00272508	1.97213e-05	2.98124e-05
414	C527NO3	195.127	C527O + NO2	O=CC(C(OO)(CO)C)O[N+](=O)[O-]	InChI=1S/C5H9NO7/c1-5(3-8,13-11)4(2-7)12-6(9)10/h2,4,8,11H,3H2,1H3	J56.*10	0.000316	0.0354256	0.0181446	0.0057294	0.000198502
415	C527OOH	166.129	GLYOX + ACETOL + OH + OH+ MACROOH + CO + OH + HO2	OOC(C(OO)(CO)C)C=O	InChI=1S/C5H10O6/c1-5(3-7,11-9)4(2-6)10-8/h2,4,7-9H,3H2,1H3	J41.*2+J17	6.658e-05	0.00746405	0.00272508	1.97213e-05	2.98124e-05
416	C52NO3	149.145	C52O + NO2	OCC(C)CCON(=O)=O	InChI=1S/C5H11NO4/c1-5(4-7)2-3-10-6(8)9/h5,7H,2-4H2,1H3	J53	1.79e-06	0.000200671	0.000233945	3.89233e-06	2.55936e-06
417	C52NO31CO	147.129	C4CHO2O + NO2	CCCC(C=O)ON(=O)=O	InChI=1S/C5H9NO4/c1-2-3-5(4-7)10-6(8)9/h4-5H,2-3H2,1H3	J56.*10	0.000316	0.0354256	0.0176071	0.00572939	0.000192622
418	C52NO31OOH	165.144	C52NO31O + OH	CCCC(COO)ON(=O)=O	InChI=1S/C5H11NO5/c1-2-3-5(4-10-9)11-6(7)8/h5,9H,2-4H2,1H3	J41	5.79e-06	0.000649096	0.000792196	1.41598e-05	8.66662e-06
419	C52NO33CO	147.129	DIEKAO + NO2	CCC(=O)C(C)ON(=O)=O	InChI=1S/C5H9NO4/c1-3-5(7)4(2)10-6(8)9/h4H,3H2,1-2H3	J56.*1.6	5.056e-05	0.0056681	0.005455	0.00318905	5.96777e-05
420	C52NO33OOH	165.144	C52NO33O + OH	CCC(OO)C(C)ON(=O)=O	InChI=1S/C5H11NO5/c1-3-5(11-9)4(2)10-6(7)8/h4-5,9H,3H2,1-2H3	J41	5.79e-06	0.000649096	0.000792196	1.41598e-05	8.66662e-06
421	C52OH1OOH	120.147	PE1ENEBO + OH	CCCC(O)COO	InChI=1S/C5H12O3/c1-2-3-5(6)4-8-7/h5-7H,2-4H2,1H3	J41	5.79e-06	0.000649096	0.00053754	1.36143e-05	5.88069e-06
422	C52OH3OOH	120.147	PE2ENEAO + OH	CCC(OO)C(C)O	InChI=1S/C5H12O3/c1-3-5(8-7)4(2)6/h4-7H,3H2,1-2H3	J41	5.79e-06	0.000649096	0.00053754	1.36143e-05	5.88069e-06
423	C52OOH	120.147	C52O + OH	OOCCC(C)CO	InChI=1S/C5H12O3/c1-5(4-6)2-3-8-7/h5-7H,2-4H2,1H3	J41	5.79e-06	0.000649096	0.00053754	1.36143e-05	5.88069e-06
424	C530NO3	163.129	C530O + NO2	O=CCC(O[N+](=O)[O-])(CO)C	InChI=1S/C5H9NO5/c1-5(4-8,2-3-7)11-6(9)10/h3,8H,2,4H2,1H3	J56.*4	0.0001264	0.0141703	0.0176071	0.00572939	0.000192622
425	C530OOH	134.131	C530O + OH+ C530O + OH	O=CCC(OO)(CO)C	InChI=1S/C5H10O4/c1-5(4-7,9-8)2-3-6/h3,7-8H,2,4H2,1H3	J41+J15	2.569e-05	0.00288002	0.00218754	1.42682e-05	2.39317e-05
426	C531CO	128.083	C31CO3 + CO + HO2	O=COC=CC(=O)C=O	InChI=1S/C5H4O4/c6-3-5(8)1-2-9-4-7/h1-4H	J34	0.000125	0.0140133	0.116958	0.0628266	0.00127952
427	C531OOH	146.098	C531O + OH+ C531O + OH	OOCC(=O)C=COC=O	InChI=1S/C5H6O5/c6-4-9-2-1-5(7)3-10-8/h1-2,4,8H,3H2	J41+J22	9.77e-06	0.00109528	0.00089269	0.000141379	9.76603e-06
428	C532CO	114.099	C31CO3 + CH3O2	O=COC=CC(=O)C	InChI=1S/C5H6O3/c1-5(7)2-3-8-4-6/h2-4H,1H3	J22	3.98e-06	0.000446184	0.00198444	0.000140787	2.17098e-05
429	C533OOH	164.113	C533O + OH+ C533O + OH	O=COC(C(C(=O)C)OO)O	InChI=1S/C5H8O6/c1-3(7)4(11-9)5(8)10-2-6/h2,4-5,8-9H,1H3	J41+J22	9.77e-06	0.00109528	0.001844	7.1487e-05	2.01734e-05
430	C534OOH	180.113	C534O + OH+ C534O + OH+ CO2H3CHO + OH + OH	O=CC(C(C(=O)OO)(OO)C)O	InChI=1S/C5H8O7/c1-5(12-10,3(7)2-6)4(8)11-9/h2-3,7,9-10H,1H3	J41+J15+J41	3.148e-05	0.00352911	0.00238154	7.27719e-05	2.6054e-05
431	C535OOH	180.113	C3MDIALOOH + OH + HO2+ C535O + OH+ CO2H3CO3H + OH + HO2 + CO	OOC(=O)C(C(C=O)(OO)C)O	InChI=1S/C5H8O7/c1-5(2-6,12-10)3(7)4(8)11-9/h2-3,7,9-10H,1H3	J41+J41+J15	3.148e-05	0.00352911	0.00227291	1.42682e-05	2.48656e-05
432	C536OOH	182.043	C3MDIALOOH + HCHO + OH + OH+ DHPMEK + CO + OH + HO2+ MGLYOX + HCOCH2OOH + OH + OH	OOCC(C(C=O)(OO)C)OO	InChI=1S/C5H10O7/c1-5(3-6,12-9)4(11-8)2-10-7/h3-4,7-9H,2H2,1H3	J41+J17+J41.*2	7.237e-05	0.00811315	0.00332475	2.39641e-05	3.63728e-05
433	C537OOH	182.043	C4CO2OOH + HCHO + OH + OH+ DHPMPAL + CO + OH + HO2+ GLYOX + HYPERACET + OH + OH	OOCC(C(C=O)OO)(OO)C	InChI=1S/C5H10O7/c1-5(12-9,3-10-7)4(2-6)11-8/h2,4,7-9H,3H2,1H3	J41+J17+J41.*2	7.237e-05	0.00811315	0.0027665	1.97213e-05	3.02655e-05
434	C53NO324CO	161.113	CO24C53O + NO2	O=N(=O)OC(C(=O)C)C(=O)C	InChI=1S/C5H7NO5/c1-3(7)5(4(2)8)11-6(9)10/h5H,1-2H3	J56.*1.6	5.056e-05	0.0056681	0.005649	0.00318985	6.18001e-05
435	C53NO32CO	147.129	MPRKAO + NO2	CCC(ON(=O)=O)C(=O)C	InChI=1S/C5H9NO4/c1-3-5(4(2)7)10-6(8)9/h5H,3H2,1-2H3	J56.*1.6	5.056e-05	0.0056681	0.005455	0.00318905	5.96777e-05
436	C53NO32OOH	165.144	C53NO32O + OH	CCC(ON(=O)=O)C(C)OO	InChI=1S/C5H11NO5/c1-3-5(4(2)11-9)10-6(7)8/h4-5,9H,3H2,1-2H3	J41	5.79e-06	0.000649096	0.000792196	1.41598e-05	8.66662e-06
437	C53OH	118.131	HCHO + HOIPRCO3 + HO2	OCC(=O)C(C)CO	InChI=1S/C5H10O3/c1-4(2-6)5(8)3-7/h4,6-7H,2-3H2,1H3	J22	3.98e-06	0.000446184	0.000194	7.13594e-05	2.12236e-06
438	C53OH2OOH	120.147	PE2ENEBO + OH	CCC(O)C(C)OO	InChI=1S/C5H12O3/c1-3-5(6)4(2)8-7/h4-7H,3H2,1-2H3	J41	5.79e-06	0.000649096	0.00053754	1.36143e-05	5.88069e-06
439	C53OOH	134.131	C53O + OH+ HCHO + HOIPRCO3 + OH	OOCC(=O)C(C)CO	InChI=1S/C5H10O4/c1-4(2-6)5(7)3-9-8/h4,6,8H,2-3H2,1H3	J41+J22	9.77e-06	0.00109528	0.00073154	7.26465e-05	8.00305e-06
440	C54CHO	100.159	PEBO2 + HO2 + CO	CC(CCC)C=O	InChI=1S/C6H12O/c1-3-4-6(2)5-7/h5-6H,3-4H2,1-2H3	J17	5.5e-05	0.00616586	0.00221	5.72e-06	2.41774e-05
441	C54CO	128.083	HO2 + CO + CO + CO + CH3CO3+ HO2 + CO + CO + CO + CH3CO3	O=CC(=O)C(=O)C(=O)C	InChI=1S/C5H4O4/c1-3(7)5(9)4(8)2-6/h2H,1H3	J34+J35.*2	0.000661	0.0741024	0.035844	0.0340001	0.000392133
442	C54CO3H	132.158	PEBO2 + OH	CC(CCC)C(=O)OO	InChI=1S/C6H12O3/c1-3-4-5(2)6(7)9-8/h5,8H,3-4H2,1-2H3	J41	5.79e-06	0.000649096	8.5369e-05	NaN	9.33937e-07
443	C54OOH	136.146	C54O + OH	OCCC(C)(O)COO	InChI=1S/C5H12O4/c1-5(7,2-3-6)4-9-8/h6-8H,2-4H2,1H3	J41	5.79e-06	0.000649096	0.00053754	1.36143e-05	5.88069e-06
444	C55OOH	134.131	C55O + OH+ C55O + OH	OOCC(=O)C(C)(C)O	InChI=1S/C5H10O4/c1-5(2,7)4(6)3-9-8/h7-8H,3H2,1-2H3	J41+J22	9.77e-06	0.00109528	0.00073154	7.26465e-05	8.00305e-06
445	C56OOH	136.146	C56O + OH	OOCC(O)C(C)CO	InChI=1S/C5H12O4/c1-4(2-6)5(7)3-9-8/h4-8H,2-3H2,1H3	J41	5.79e-06	0.000649096	0.00053754	1.36143e-05	5.88069e-06
446	C57AOOH	150.13	C57AO + OH	OCC(C(C=O)(O)C)OO	InChI=1S/C5H10O5/c1-5(8,3-7)4(2-6)10-9/h3-4,6,8-9H,2H2,1H3	J41	5.79e-06	0.000649096	0.00218754	1.42682e-05	2.39317e-05
447	C57NO3	179.128	MGLYOX + HOCH2CHO + HO2 + NO2	OCC(O)C(C)(C=O)ON(=O)=O	InChI=1S/C5H9NO6/c1-5(3-8,4(9)2-7)12-6(10)11/h3-4,7,9H,2H2,1H3	J56.*10	0.000316	0.0354256	0.0176071	0.00572939	0.000192622
448	C57NO3CO3H	211.127	HO12CO3C4 + NO2 + OH	OCC(O)C(C)(ON(=O)=O)C(=O)OO	InChI=1S/C5H9NO8/c1-5(3(8)2-7,4(9)13-12)14-6(10)11/h3,7-8,12H,2H2,1H3	J41	5.79e-06	0.000649096	0.005455	0.00318905	5.96777e-05
449	C57OOH	150.13	C57O + OH	OCC(O)C(C)(OO)C=O	InChI=1S/C5H10O5/c1-5(3-7,10-9)4(8)2-6/h3-4,6,8-9H,2H2,1H3	J41	5.79e-06	0.000649096	0.00218754	1.42682e-05	2.39317e-05
450	C58ANO3	179.128	GLYOX + ACETOL + HO2 + NO2	[O-][N+](=O)OC(C(CO)(O)C)C=O	InChI=1S/C5H9NO6/c1-5(9,3-8)4(2-7)12-6(10)11/h2,4,8-9H,3H2,1H3	J56.*10	0.000316	0.0354256	0.0176071	0.00572939	0.000192622
451	C58AOOH	150.13	C58AO + OH	OOC(C=O)C(C)(O)CO	InChI=1S/C5H10O5/c1-5(8,3-7)4(2-6)10-9/h2,4,7-9H,3H2,1H3	J41	5.79e-06	0.000649096	0.00218754	1.42682e-05	2.39317e-05
452	C58NO3	179.128	ACETOL + GLYOX + HO2 + NO2	O=CC(O)C(C)(CO)ON(=O)=O	InChI=1S/C5H9NO6/c1-5(3-8,4(9)2-7)12-6(10)11/h2,4,8-9H,3H2,1H3	J56.*4	0.0001264	0.0141703	0.0176071	0.00572939	0.000192622
453	C58NO3CO3H	211.127	MACRNO3 + HO2 + OH	OOC(=O)C(O)C(C)(CO)ON(=O)=O	InChI=1S/C5H9NO8/c1-5(2-7,14-6(10)11)3(8)4(9)13-12/h3,7-8,12H,2H2,1H3	J41	5.79e-06	0.000649096	9.87202e-05	3.89233e-06	1.08e-06
454	C58OOH	150.13	C58O + OH	O=CC(O)C(C)(CO)OO	InChI=1S/C5H10O5/c1-5(3-7,10-9)4(8)2-6/h2,4,7-9H,3H2,1H3	J41	5.79e-06	0.000649096	0.00218754	1.42682e-05	2.39317e-05
455	C59OOH	150.13	C59O + OH+ HOCH2CO3 + ACETOL + OH	OCC(=O)C(C)(CO)OO	InChI=1S/C5H10O5/c1-5(3-7,10-9)4(8)2-6/h6-7,9H,2-3H2,1H3	J41+J22	9.77e-06	0.00109528	0.00073154	7.26465e-05	8.00305e-06
456	C5CO14OH	114.099	CH3CO3 + HCOCO2H + HO2 + CO+ CH3CO3 + HCOCO2H + HO2 + CO	CC(=O)C=CC(=O)O	InChI=1S/C5H6O3/c1-4(6)2-3-5(7)8/h2-3H,1H3,(H,7,8)	J23+J24	3.6e-06	0.000403583	0.000334439	0.000140722	3.65876e-06
457	C5CO14OOH	130.099	C5CO14CO2 + OH	CC(=O)C=CC(=O)OO	InChI=1S/C5H6O4/c1-4(6)2-3-5(7)9-8/h2-3,8H,1H3	J20.*2	0.001128	0.126456	0.000419808	0.000140722	4.5927e-06
458	C5CO234	114.099	CH3CO3 + CH3CO3 + CO	CC(=O)C(=O)C(=O)C	InChI=1S/C5H6O3/c1-3(6)5(8)4(2)7/h1-2H3	J35	0.000268	0.0300445	0.034194	0.0340001	0.000374082
459	C5CO234OOH	146.098	C5CO234O + OH+ C5CO234O + OH	CC(=O)C(=O)C(=O)COO	InChI=1S/C5H6O5/c1-3(6)5(8)4(7)2-10-9/h9H,2H2,1H3	J41+J35	0.00027379	0.0306936	0.0347523	0.0340001	0.00038019
460	C5CO23CHO	114.099	C2H5CO3 + CO + HO2 + CO+ C2H5O2 + CO + CO + HO2	CCC(=O)C(=O)C=O	InChI=1S/C5H6O3/c1-2-4(7)5(8)3-6/h3H,2H2,1H3	J35+J34	0.000393	0.0440578	0.03565	0.034	0.000390011
461	C5CO23OOH	132.115	C5CO23O + OH	CCC(=O)C(=O)COO	InChI=1S/C5H8O4/c1-2-4(6)5(7)3-9-8/h8H,2-3H2,1H3	J41	5.79e-06	0.000649096	0.0345583	0.034	0.000378067
462	C5CO243OH	116.115	MGLYOX + CH3CO3 + HO2	CC(=O)C(O)C(=O)C	InChI=1S/C5H8O3/c1-3(6)5(8)4(2)7/h5,8H,1-2H3	J22.*2	7.96e-06	0.000892368	0.000388	0.000100917	4.24472e-06
463	C5CO2DCO3H	158.109	CH3CO3 + C33CO + OH+ CH3CO3 + C33CO + OH	O=CC(=O)C=C(C)C(=O)OO	InChI=1S/C6H6O5/c1-4(6(9)11-10)2-5(8)3-7/h2-3,10H,1H3	J41+J34	0.00013079	0.0146624	0.00262981	0.000140838	2.87701e-05
464	C5CO3OH	130.099	C33CO + CH3CO3 + HO2+ C33CO + CH3CO3 + HO2	O=CC(=O)C(O)C(=O)C	InChI=1S/C5H6O4/c1-3(7)5(9)4(8)2-6/h2,5,9H,1H3	J22+J34	0.00012898	0.0144595	0.002038	0.000101008	2.22957e-05
465	C5COCHOOOH	132.115	C5COCHOO + OH+ C5COCHOO + OH+ C5COCHOO + OH	OOCC(=O)CCC=O	InChI=1S/C5H8O4/c6-3-1-2-5(7)4-9-8/h3,8H,1-2,4H2	J41+J22+J15	2.967e-05	0.0033262	0.00240225	7.27719e-05	2.62806e-05
466	C5CODBCO2H	128.126	CH3COCO2H + CH3CO3 + HO2 + CO	CC(=O)C=C(C)C(=O)O	InChI=1S/C6H8O3/c1-4(6(8)9)3-5(2)7/h3H,1-2H3,(H,8,9)	J24	1.8e-06	0.000201792	0.000334439	0.000140722	3.65876e-06
467	C5CODBCO3H	144.125	C4MCODBCO2 + OH	CC(=CC(=O)C)C(=O)OO	InChI=1S/C6H8O4/c1-4(3-5(2)7)6(8)10-9/h3,9H,1-2H3	J20.*2	0.001128	0.126456	0.000419808	0.000140722	4.5927e-06
468	C5COHOCO3H	176.124	C5CO234 + OH + HO2+ C5CO234 + OH + HO2	OOC(=O)C(C)(O)C(=O)C(=O)C	InChI=1S/C6H8O6/c1-3(7)4(8)6(2,10)5(9)12-11/h10-11H,1-2H3	J41+J35	0.00027379	0.0306936	0.0286943	0.00762411	0.000313916
469	C5CONO3OOH	179.128	C4MCONO3O + OH	OOC(C)(C)C(=O)CON(=O)=O	InChI=1S/C5H9NO6/c1-5(2,12-10)4(7)3-11-6(8)9/h10H,3H2,1-2H3	J41	5.79e-06	0.000649096	0.00601325	0.00318908	6.5785e-05
470	C5COOHCO3H	174.108	HOCOC4DIAL + HO2 + CO + OH	OC(C=O)C(=O)C=CC(=O)OO	InChI=1S/C6H6O6/c7-3-5(9)4(8)1-2-6(10)12-11/h1-3,5,9,11H	J41	5.79e-06	0.000649096	0.00306281	0.000453808	3.35071e-05
471	C5DBCOCO2H	128.126	HCOCO2H + CH3CO3 + CH3CO3	OC(=O)C=C(C)C(=O)C	InChI=1S/C6H8O3/c1-4(5(2)7)3-6(8)9/h3H,1-2H3,(H,8,9)	J24	1.8e-06	0.000201792	0.000334439	0.000140722	3.65876e-06
472	C5DBCOCO3H	144.125	MC4CODBCO2 + OH	OOC(=O)C=C(C)C(=O)C	InChI=1S/C6H8O4/c1-4(5(2)7)3-6(8)10-9/h3,9H,1-2H3	J20.*2	0.001128	0.126456	0.000419808	0.000140722	4.5927e-06
473	C5DBECO3H	186.162	CO234C6 + HO2 + CO + OH	OOC(=O)C=C(CC)C(=O)C(=O)C	InChI=1S/C8H10O5/c1-3-6(4-7(10)13-12)8(11)5(2)9/h4,12H,3H2,1-2H3	J41	5.79e-06	0.000649096	0.0286943	0.00762411	0.000313916
474	C5DCO2CO3H	158.109	CO23C3CHO + HO2 + CO + OH+ CO23C3CHO + HO2 + CO + OH	OOC(=O)C=C(C)C(=O)C=O	InChI=1S/C6H6O5/c1-4(5(8)3-7)2-6(9)11-10/h2-3,10H,1H3	J41+J34	0.00013079	0.0146624	0.125585	0.0120208	0.0013739
475	C5DIALCO	112.084	MALDIALCO3 + CO + HO2+ MALDIALCO3 + CO + HO2+ MALDIALCO3 + CO + HO2	O=CC=CC(=O)C=O	InChI=1S/C5H4O3/c6-3-1-2-5(8)4-7/h1-4H	J34+J18+J19	0.0001272	0.0142599	0.116958	0.0628266	0.00127952
476	C5DIALOH	114.099	MALDIAL + CO + HO2 + HO2+ MALDIAL + CO + HO2 + HO2	O=CC=CC(O)C=O	InChI=1S/C5H6O3/c6-3-1-2-5(8)4-7/h1-5,8H	J18+J19	2.2e-06	0.000246634	0.116632	0.062826	0.00127595
477	C5DIALOOH	130.099	C5DIALO + OH+ MALDIAL + CO + HO2 + OH+ MALDIAL + CO + HO2 + OH	O=CC=CC(OO)C=O	InChI=1S/C5H6O4/c6-3-1-2-5(4-7)9-8/h1-5,8H	J41+J18+J19	7.99e-06	0.000895731	0.11719	0.062826	0.00128206
478	C5DICARB	98.0999	C5CO14O2 + HO2+ TLFUONE	O=CC=CC(=O)C	InChI=1S/C5H6O2/c1-5(7)3-2-4-6/h2-4H,1H3	J4.*0.2.*0.6+J4.*0.2.*0.4	0.001784	0.199998	0.00198444	0.000140787	2.17098e-05
479	C5DICAROOH	148.114	C5DICARBO + OH+ C5DICARBO + OH+ C5DICARBO + OH	OOC(C(=O)C)C(O)C=O	InChI=1S/C5H8O5/c1-3(7)5(10-9)4(8)2-6/h2,4-5,8-9H,1H3	J41+J15+J22	2.967e-05	0.0033262	0.00238154	7.27719e-05	2.6054e-05
480	C5EDBCO3H	186.162	CO23C3CHO + C2H5CO3 + OH	OOC(=O)C(=CC(=O)C(=O)C)CC	InChI=1S/C8H10O5/c1-3-6(8(11)13-12)4-7(10)5(2)9/h4,12H,3H2,1-2H3	J41	5.79e-06	0.000649096	0.0286943	0.00762411	0.000313916
481	C5H11CHO	100.159	CH3CHO + BUT1ENE+ PEAO2 + HO2 + CO	CCCCCC=O	InChI=1S/C6H12O/c1-2-3-4-5-6-7/h6H,2-5H2,1H3	J16+J15	3.18e-05	0.00356499	0.00221	5.72e-06	2.41774e-05
482	C5H11CO3H	132.158	PEAO2 + OH	CCCCCC(=O)OO	InChI=1S/C6H12O3/c1-2-3-4-5-6(7)9-8/h8H,2-5H2,1H3	J41	5.79e-06	0.000649096	8.5369e-05	NaN	9.33937e-07
483	C5HPALD1	116.115	CH3CO3 + HOCH2CHO + CO + OH+ HVMK + CO + OH + OH	C/C(=C/COO)/C=O	InChI=1S/C5H8O3/c1-5(4-6)2-3-8-7/h2,4,7H,3H2,1H3/b5-2-	J20.*0.5+J20.*0.5	0.000564	0.0632281	0.000884532	0.000277865	9.67678e-06
484	C5HPALD2	116.115	ACETOL + CO + CO + HO2 + OH+ HMAC + CO + OH + OH	C/C(=C/C=O)/COO	InChI=1S/C5H8O3/c1-5(2-3-6)4-8-7/h2-3,7H,4H2,1H3/b5-2-	J20.*0.5+J20.*0.5	0.000564	0.0632281	0.000884532	0.000277865	9.67678e-06
485	C5M2OHCO3H	202.161	C5134CO2OH + CH3CO3 + OH	O=CC(O)C(=O)C(=C(C)C(=O)OO)C	InChI=1S/C8H10O6/c1-4(5(2)8(12)14-13)7(11)6(10)3-9/h3,6,10,13H,1-2H3	J41	5.79e-06	0.000649096	0.00246044	0.000582259	2.69172e-05
486	C5MDICARB	112.126	C4MCODBCO3 + HO2+ MXYFUONE	O=CC(=CC(=O)C)C	InChI=1S/C6H8O2/c1-5(4-7)3-6(2)8/h3-4H,1-2H3	J4.*0.2.*0.6+J4.*0.2.*0.4	0.001784	0.199998	0.00254444	0.000140838	2.78362e-05
487	C5MEJCO3H	216.188	C6134CO2OH + CH3CO3 + OH	O=CC(O)C(=O)C(=C(C)C(=O)OO)CC	InChI=1S/C9H12O6/c1-3-6(5(2)9(13)15-14)8(12)7(11)4-10/h4,7,11,14H,3H2,1-2H3	J41	5.79e-06	0.000649096	0.00246044	0.000582259	2.69172e-05
488	C5MO132OH	130.142	IPRCO3 + GLYOX + HO2+ IPRGLYOX + HO2 + HO2 + CO	O=CC(O)C(=O)C(C)C	InChI=1S/C6H10O3/c1-4(2)6(9)5(8)3-7/h3-5,8H,1-2H3	J22+J17	5.898e-05	0.00661204	0.002643	0.000431438	2.89144e-05
489	C5NO3CO4OH	163.129	HO2CO4C5O + NO2	CC(O)CC(=O)CON(=O)=O	InChI=1S/C5H9NO5/c1-4(7)2-5(8)3-11-6(9)10/h4,7H,2-3H2,1H3	J56	3.16e-05	0.00354256	0.005455	0.00318905	5.96777e-05
490	C5NO3O4OOH	179.128	C5NO3CO4O + OH+ C5NO3CO4O + OH	OOC(C)C(=O)C(C)ON(=O)=O	InChI=1S/C5H9NO6/c1-3(11-6(8)9)5(7)4(2)12-10/h3-4,10H,1-2H3	J41+J56.*1.6	5.635e-05	0.0063172	0.00601325	0.00318908	6.5785e-05
491	C5NO3OAOOH	179.128	C5NO3COAO + OH+ C5NO3COAO + OH	OOC(C)CC(=O)CON(=O)=O	InChI=1S/C5H9NO6/c1-4(12-10)2-5(7)3-11-6(8)9/h4,10H,2-3H2,1H3	J41+J56	3.739e-05	0.00419166	0.00601325	0.00318908	6.5785e-05
492	C5O5OHCO3H	162.141	C3H7CO3 + HCOCO3H + HO2+ PGLYOX + HO2 + CO	CCCC(=O)C(O)C(=O)OO	InChI=1S/C6H10O5/c1-2-3-4(7)5(8)6(9)11-10/h5,8,10H,2-3H2,1H3	J22+J41	9.77e-06	0.00109528	0.000518369	0.0004314	5.67096e-06
493	C5OCO3M	144.125	MEKBO2 + HO2 + CO+ MEKBO2 + HO2 + CO	O=CC(=O)OC(C)C(=O)C	InChI=1S/C6H8O4/c1-4(8)5(2)10-6(9)3-7/h3,5H,1-2H3	J22+J34	0.00012898	0.0144595	0.003076	0.000610119	3.36514e-05
494	C5OHCO4OOH	134.131	C5OH2CO4O + OH+ IC3H7O2 + HOCH2CO3	OOC(C)CC(=O)CO	InChI=1S/C5H10O4/c1-4(9-8)2-5(7)3-6/h4,6,8H,2-3H2,1H3	J41+J22	9.77e-06	0.00109528	0.00073154	7.26465e-05	8.00305e-06
495	C5ONO34OOH	179.128	C5CONO34O + OH+ C5CONO34O + OH	OOC(C)C(ON(=O)=O)C(=O)C	InChI=1S/C5H9NO6/c1-3(7)5(4(2)12-10)11-6(8)9/h4-5,10H,1-2H3	J41+J22	9.77e-06	0.00109528	0.00601325	0.00318908	6.5785e-05
496	C5PACALD1	130.099	CH3CO3 + GLYOX + OH	C/C(=C/C=O)/C(=O)OO	InChI=1S/C5H6O4/c1-4(2-3-6)5(7)9-8/h2-3,8H,1H3/b4-2-	J20.*2	0.001128	0.126456	0.00041165	0.000277531	4.50345e-06
497	C5PACALD2	130.099	CO + HO2 + MGLYOX + OH	OOC(=O)/C=C(\C=O)/C	InChI=1S/C5H6O4/c1-4(3-6)2-5(7)9-8/h2-3,8H,1H3/b4-2-	J20.*2	0.001128	0.126456	0.00041165	0.000277531	4.50345e-06
498	C5TRONCO3H	174.108	C5124COO2 + OH+ C5124COO2 + OH+ C5124COO2 + OH	OOC(=O)CC(=O)CC(=O)C=O	InChI=1S/C6H6O6/c7-3-5(9)1-4(8)2-6(10)12-11/h3,11H,1-2H2	J41+J22+J34	0.00013477	0.0151086	0.0147271	0.000630807	0.000161115
499	C610NO3	177.155	C610O + NO2	OCC(ON(=O)=O)C(C)C(=O)C	InChI=1S/C6H11NO5/c1-4(5(2)9)6(3-8)12-7(10)11/h4,6,8H,3H2,1-2H3	J22	3.98e-06	0.000446184	0.00465	0.000743034	5.0871e-05
500	C610OH	132.158	C610O + HO2	OCC(O)C(C)C(=O)C	InChI=1S/C6H12O3/c1-4(5(2)8)6(9)3-7/h4,6-7,9H,3H2,1-2H3	J22	3.98e-06	0.000446184	0.000433	0.0004314	4.73702e-06
501	C610OOH	148.157	C610O + OH+ C610O + OH	OCC(OO)C(C)C(=O)C	InChI=1S/C6H12O4/c1-4(5(2)8)6(3-7)10-9/h4,6-7,9H,3H2,1-2H3	J41+J22	9.77e-06	0.00109528	0.00097054	0.000431615	1.06177e-05
502	C611OH	130.142	CH3CO3 + BIACET + HO2	CC(=O)C(C)(O)C(=O)C	InChI=1S/C6H10O3/c1-4(7)6(3,9)5(2)8/h9H,1-3H3	J22.*2.0	7.96e-06	0.000892368	0.000866	0.000610092	9.47404e-06
503	C611OOH	146.141	C611O + OH+ CH3CO3 + BIACET + OH	OOC(C)(C(=O)C)C(=O)C	InChI=1S/C6H10O4/c1-4(7)6(3,10-9)5(2)8/h9H,1-3H3	J41+J22.*2.0	1.375e-05	0.00154146	0.00142425	0.000610244	1.55813e-05
504	C6125CO	126.11	C5CO14O2 + CO + HO2+ C5CO14O2 + CO + HO2+ C5CO14O2 + CO + HO2	O=CC(=O)C=CC(=O)C	InChI=1S/C6H6O3/c1-5(8)2-3-6(9)4-7/h2-4H,1H3	J34+J23+J24	0.0001286	0.0144169	0.00297744	0.000453808	3.25732e-05
505	C612OH	132.158	C612O + HO2	OCC(=O)C(C)(C)CO	InChI=1S/C6H12O3/c1-6(2,4-8)5(9)3-7/h7-8H,3-4H2,1-2H3	J22	3.98e-06	0.000446184	0.000433	0.0004314	4.73702e-06
506	C612OOH	148.157	C612O + OH+ C612O + OH	OOCC(=O)C(C)(C)CO	InChI=1S/C6H12O4/c1-6(2,4-7)5(8)3-10-9/h7,9H,3-4H2,1-2H3	J41+J22	9.77e-06	0.00109528	0.00097054	0.000431615	1.06177e-05
507	C6134CO2OH	144.125	HCOCOHCO3 + C2H5CO3	CCC(=O)C(=O)C(O)C=O	InChI=1S/C6H8O4/c1-2-4(8)6(10)5(9)3-7/h3,5,9H,2H2,1H3	J35	0.000268	0.0300445	0.0308189	0.00762411	0.000337159
508	C6135COOOH	160.125	C6135COO + OH+ C6135COO + OH+ C6135COO + OH	OOCC(=O)CC(=O)CC=O	InChI=1S/C6H8O5/c7-2-1-5(8)3-6(9)4-11-10/h2,10H,1,3-4H2	J41+J22.*2+J15	3.365e-05	0.00377238	0.00363425	0.00061027	3.97587e-05
509	C613OOH	164.156	BIACET + HOCH2CHO + OH + HO2+ C613O + OH	OCC(OO)C(C)(O)C(=O)C	InChI=1S/C6H12O5/c1-4(8)6(2,9)5(3-7)11-10/h5,7,9-10H,3H2,1-2H3	J22+J41	9.77e-06	0.00109528	0.00097054	0.000431615	1.06177e-05
510	C6145COOOH	160.125	C6145COO + OH+ C6145COO + OH+ C6145COO + OH	OOCC(=O)C(=O)CCC=O	InChI=1S/C6H8O5/c7-3-1-2-5(8)6(9)4-11-10/h3,10H,1-2,4H2	J41+J15+J35	0.00029369	0.0329246	0.0313772	0.00762412	0.000343267
511	C614CO	144.125	BIACETO2 + HOCH2CO3	OCC(=O)CC(=O)C(=O)C	InChI=1S/C6H8O4/c1-4(8)6(10)2-5(9)3-7/h7H,2-3H2,1H3	J22	3.98e-06	0.000446184	0.0290419	0.0076363	0.000317719
512	C614CO23OH	146.141	C32OH13CO + C2H5CO3 + HO2+ CO3H4CHO + HO2 + CO + HO2	CCC(=O)C(O)C(O)C=O	InChI=1S/C6H10O4/c1-2-4(8)6(10)5(9)3-7/h3,5-6,9-10H,2H2,1H3	J22+J15	2.388e-05	0.0026771	0.002643	0.000431438	2.89144e-05
513	C614NO3	191.139	C614O + NO2	OCC(ON(=O)=O)CC(=O)C(=O)C	InChI=1S/C6H9NO6/c1-4(9)6(10)2-5(3-8)13-7(11)12/h5,8H,2-3H2,1H3	J35	0.000268	0.0300445	0.0286199	0.00762417	0.000313102
514	C614OH	146.141	C614O + HO2	CC(=O)C(=O)CC(O)CO	InChI=1S/C6H10O4/c1-4(8)6(10)2-5(9)3-7/h5,7,9H,2-3H2,1H3	J35	0.000268	0.0300445	0.0286089	0.00762411	0.000312982
515	C614OOH	162.141	C614O + OH+ C614O + OH	OCC(OO)CC(=O)C(=O)C	InChI=1S/C6H10O5/c1-4(8)6(9)2-5(3-7)11-10/h5,7,10H,2-3H2,1H3	J41+J35	0.00027379	0.0306936	0.0291465	0.00762412	0.000318863
516	C615CO	128.126	CO1M22CO3 + CO + HO2+ CO1M22CO3 + CO + HO2	O=CC(=O)C(C)(C)C=O	InChI=1S/C6H8O3/c1-6(2,4-8)5(9)3-7/h3-4H,1-2H3	J34+J15	0.0001449	0.0162442	0.004853	0.000431476	5.30918e-05
517	C615CO2H	158.152	C615O2 + HO2	O=CC(C(=O)O)C(C)(C)C=O	InChI=1S/C7H10O4/c1-7(2,4-9)5(3-8)6(10)11/h3-5H,1-2H3,(H,10,11)	J15.*2	3.98e-05	0.00446184	0.00208	0.000234759	2.27552e-05
518	C615CO2OH	128.126	C5DICARB + CO + HO2 + HO2+ C5DICARB + CO + HO2 + HO2	O=CC(O)C=CC(=O)C	InChI=1S/C6H8O3/c1-5(8)2-3-6(9)4-7/h2-4,6,9H,1H3	J23+J24	3.6e-06	0.000403583	0.00254444	0.000140838	2.78362e-05
519	C615CO2OOH	144.125	C5DICARB + CO + HO2 + OH+ C5DICARB + CO + HO2 + OH+ C615CO2O + OH	OOC(C=O)C=CC(=O)C	InChI=1S/C6H8O4/c1-5(8)2-3-6(4-7)10-9/h2-4,6,9H,1H3	J23+J24+J41	9.39e-06	0.00105268	0.00310269	0.000141495	3.39434e-05
520	C615CO3H	174.151	C615O2 + OH+ C615O2 + OH	OOC(=O)C(C=O)C(C)(C)C=O	InChI=1S/C7H10O5/c1-7(2,4-9)5(3-8)6(10)12-11/h3-5,11H,1-2H3	J41+J15.*2	4.559e-05	0.00511093	0.00245337	0.000299108	2.68399e-05
521	C615OH	130.142	C615O + HO2	O=CC(O)C(C)(C)C=O	InChI=1S/C6H10O3/c1-6(2,4-8)5(9)3-7/h3-5,9H,1-2H3	J15.*2	3.98e-05	0.00446184	0.00442	8.0893e-06	4.83548e-05
522	C615OOH	146.141	C615O + OH+ C615O + OH	OOC(C=O)C(C)(C)C=O	InChI=1S/C6H10O4/c1-6(2,4-8)5(3-7)10-9/h3-5,9H,1-2H3	J41+J15.*2	4.559e-05	0.00511093	0.00497825	1.58362e-05	5.44621e-05
523	C616OH	144.125	C616O + HO2	O=CCCC(=O)C(O)C=O	InChI=1S/C6H8O4/c7-3-1-2-5(9)6(10)4-8/h3-4,6,10H,1-2H2	J15.*2	3.98e-05	0.00446184	0.004853	0.000431476	5.30918e-05
524	C616OOH	160.125	C616O + OH+ C616O + OH	O=CCCC(=O)C(OO)C=O	InChI=1S/C6H8O5/c7-3-1-2-5(9)6(4-8)11-10/h3-4,6,10H,1-2H2	J41+J15.*2	4.559e-05	0.00511093	0.00541125	0.000431691	5.91991e-05
525	C617CHO	142.153	C617O2 + HO2 + CO+ C618O2 + HO2 + CO	O=CCC(=O)C(C)(C)C=O	InChI=1S/C7H10O3/c1-7(2,5-9)6(10)3-4-8/h4-5H,3H2,1-2H3	J15+J15	3.98e-05	0.00446184	0.002368	0.000299108	2.59059e-05
526	C617CO2H	158.152	C617O2 + HO2	O=CC(C)(C)C(=O)CC(=O)O	InChI=1S/C7H10O4/c1-7(2,4-8)5(9)3-6(10)11/h4H,3H2,1-2H3,(H,10,11)	J15	1.99e-05	0.00223092	0.001328	0.000248816	1.45283e-05
527	C617CO3H	174.151	C617O2 + OH+ C617O2 + OH	OOC(=O)CC(=O)C(C)(C)C=O	InChI=1S/C7H10O5/c1-7(2,4-8)5(9)3-6(10)12-11/h4,11H,3H2,1-2H3	J41+J15	2.569e-05	0.00288002	0.00141337	0.000248816	1.54623e-05
528	C617OH	130.142	C617O + HO2	OCC(=O)C(C)(C)C=O	InChI=1S/C6H10O3/c1-6(2,4-8)5(9)3-7/h4,7H,3H2,1-2H3	J15	1.99e-05	0.00223092	0.002643	0.000431438	2.89144e-05
529	C617OOH	146.141	C617O + OH+ C617O + OH	OOCC(=O)C(C)(C)C=O	InChI=1S/C6H10O4/c1-6(2,4-7)5(8)3-10-9/h4,9H,3H2,1-2H3	J41+J15	2.569e-05	0.00288002	0.00320125	0.000431653	3.50217e-05
530	C618CO2H	158.152	C618O2 + HO2	O=CCC(=O)C(C)(C)C(=O)O	InChI=1S/C7H10O4/c1-7(2,6(10)11)5(9)3-4-8/h4H,3H2,1-2H3,(H,10,11)	J15	1.99e-05	0.00223092	0.001328	0.000248816	1.45283e-05
531	C618CO3H	174.151	C618O2 + OH+ C618O2 + OH	O=CCC(=O)C(C)(C)C(=O)OO	InChI=1S/C7H10O5/c1-7(2,6(10)12-11)5(9)3-4-8/h4,11H,3H2,1-2H3	J41+J15	2.569e-05	0.00288002	0.00141337	0.000248816	1.54623e-05
532	C618OOH	146.141	C618O + OH+ C618O + OH	O=CCC(=O)C(C)(C)OO	InChI=1S/C6H10O4/c1-6(2,10-9)5(8)3-4-7/h4,9H,3H2,1-2H3	J41+J15	2.569e-05	0.00288002	0.00320125	0.000431653	3.50217e-05
533	C619OOH	144.125	C619O + OH	OOC1CC(=O)CCC1=O	InChI=1S/C6H8O4/c7-4-1-2-5(8)6(3-4)10-9/h6,9H,1-3H2	J41	5.79e-06	0.000649096	0.00340409	0.000431615	3.72408e-05
534	C61CHO	158.152	C3H7CO3 + CO + GLYOX + OH+ C3H7CO3 + HCOCOHCO3+ CO45C5CHO + HO2 + CO + HO2	CCCC(=O)C(=O)C(O)C=O	InChI=1S/C7H10O4/c1-2-3-5(9)7(11)6(10)4-8/h4,6,10H,2-3H2,1H3	J22+J35+J15	0.00029188	0.0327216	0.0296489	0.00762591	0.000324359
535	C61CO	130.142	CO2C3CO3 + CH3CHO + HO2	CC(=O)CC(=O)C(C)O	InChI=1S/C6H10O3/c1-4(7)3-6(9)5(2)8/h5,8H,3H2,1-2H3	J22.*2	7.96e-06	0.000892368	0.000866	0.000610092	9.47404e-06
536	C61CO3H	190.151	CO45C5CHO + HO2 + OH+ CO45C5CHO + HO2 + OH+ CO45C5CHO + HO2 + OH	CCCC(=O)C(=O)C(O)C(=O)OO	InChI=1S/C7H10O6/c1-2-3-4(8)5(9)6(10)7(11)13-12/h6,10,12H,2-3H2,1H3	J41+J35+J22	0.00027777	0.0311398	0.0286943	0.00762411	0.000313916
537	C61NO3	177.155	C61O + NO2+ C61O + NO2	CC(=O)CC(ON(=O)=O)C(C)O	InChI=1S/C6H11NO5/c1-4(8)3-6(5(2)9)12-7(10)11/h5-6,9H,3H2,1-2H3	J54+J22	6.97e-06	0.000781382	0.00465	0.000743034	5.0871e-05
538	C61OH	132.158	C61O + HO2	CC(=O)CC(O)C(C)O	InChI=1S/C6H12O3/c1-4(7)3-6(9)5(2)8/h5-6,8-9H,3H2,1-2H3	J22	3.98e-06	0.000446184	0.000433	0.0004314	4.73702e-06
539	C61OOH	148.157	C61O + OH+ C61O + OH	OOC(CC(=O)C)C(C)O	InChI=1S/C6H12O4/c1-4(7)3-6(10-9)5(2)8/h5-6,8-9H,3H2,1-2H3	J41+J22	9.77e-06	0.00109528	0.00097054	0.000431615	1.06177e-05
540	C620OH	144.125	C620O + HO2	O=CCC(=O)C(O)CC=O	InChI=1S/C6H8O4/c7-3-1-5(9)6(10)2-4-8/h3-5,9H,1-2H2	J15.*2	3.98e-05	0.00446184	0.004853	0.000431476	5.30918e-05
541	C620OOH	160.125	C620O + OH+ C620O + OH	O=CCC(=O)C(OO)CC=O	InChI=1S/C6H8O5/c7-3-1-5(9)6(11-10)2-4-8/h3-4,6,10H,1-2H2	J41+J15.*2	4.559e-05	0.00511093	0.00541125	0.000431691	5.91991e-05
542	C621OOH	178.14	C621O + OH+ C621O + OH	OCC(OO)CC(=O)C(=O)CO	InChI=1S/C6H10O6/c7-2-4(12-11)1-5(9)6(10)3-8/h4,7-8,11H,1-3H2	J41+J22	9.77e-06	0.00109528	0.0291465	0.00762412	0.000318863
543	C622CHO	128.169	C622O2 + CO + HO2	CC(=C)C(CC=O)CO	InChI=1S/C7H12O2/c1-6(2)7(5-9)3-4-8/h4,7,9H,1,3,5H2,2H3	J15	1.99e-05	0.00223092	0.000326281	0.000277531	3.56951e-06
544	C622CO3H	160.168	C622O2 + OH	OCC(CC(=O)OO)C(=C)C	InChI=1S/C7H12O4/c1-5(2)6(4-8)3-7(9)11-10/h6,8,10H,1,3-4H2,2H3	J41	5.79e-06	0.000649096	0.000334439	0.000140722	3.65876e-06
545	C622NO3	161.156	C622O + NO2	[O-][N+](=O)OCC(CO)C(=C)C	InChI=1S/C6H11NO4/c1-5(2)6(3-8)4-11-7(9)10/h6,8H,1,3-4H2,2H3	J53	1.79e-06	0.000200671	1.09985e-05	3.23144e-05	1.20324e-07
546	C622OOH	132.158	C622O + OH	OOCC(CO)C(=C)C	InChI=1S/C6H12O3/c1-5(2)6(3-7)4-9-8/h6-8H,1,3-4H2,2H3	J41	5.79e-06	0.000649096	0.00053754	1.36143e-05	5.88069e-06
547	C623OOH	164.156	C623O + OH	OCC(C=O)C(C)(CO)OO	InChI=1S/C6H12O5/c1-6(4-9,11-10)5(2-7)3-8/h2,5,8-10H,3-4H2,1H3	J41	5.79e-06	0.000649096	0.00318054	0.000431653	3.47951e-05
548	C624CO	114.142	MACO3 + HOCH2CH2O2	CC(=C)C(=O)CCO	InChI=1S/C6H10O2/c1-5(2)6(8)3-4-7/h7H,1,3-4H2,2H3	J22	3.98e-06	0.000446184	0.000334439	0.000140722	3.65876e-06
549	C624CO3H	160.168	C624O2 + OH	OCCC(C(=C)C)C(=O)OO	InChI=1S/C7H12O4/c1-5(2)6(3-4-8)7(9)11-10/h6,8,10H,1,3-4H2,2H3	J41	5.79e-06	0.000649096	8.5369e-05	NaN	9.33937e-07
550	C624NO3	161.156	C624O + NO2	[O-][N+](=O)OC(CCO)C(=C)C	InChI=1S/C6H11NO4/c1-5(2)6(3-4-8)11-7(9)10/h6,8H,1,3-4H2,2H3	J54	2.99e-06	0.000335198	0.00019272	3.23144e-05	2.10836e-06
551	C624OOH	132.158	C624O + OH	OCCC(OO)C(=C)C	InChI=1S/C6H12O3/c1-5(2)6(9-8)3-4-7/h6-8H,1,3-4H2,2H3	J41	5.79e-06	0.000649096	0.00053754	1.36143e-05	5.88069e-06
552	C625OH	148.157	HOC2H4CO3 + ACETOL + HO2	OCCC(=O)C(C)(O)CO	InChI=1S/C6H12O4/c1-6(10,4-8)5(9)2-3-7/h7-8,10H,2-4H2,1H3	J22	3.98e-06	0.000446184	0.000433	0.0004314	4.73702e-06
553	C625OOH	164.156	C625O + OH+ HOC2H4CO3 + ACETOL + OH	OCCC(=O)C(C)(CO)OO	InChI=1S/C6H12O5/c1-6(4-8,11-10)5(9)2-3-7/h7-8,10H,2-4H2,1H3	J41+J22	9.77e-06	0.00109528	0.00097054	0.000431615	1.06177e-05
554	C626CHO	142.153	C626O2 + CO + HO2	O=CCC(CC=O)C(=O)C	InChI=1S/C7H10O3/c1-6(10)7(2-4-8)3-5-9/h4-5,7H,2-3H2,1H3	J15.*2	3.98e-05	0.00446184	0.002368	0.000299108	2.59059e-05
555	C626CO2H	158.152	C626O2 + HO2	O=CCC(CC(=O)O)C(=O)C	InChI=1S/C7H10O4/c1-5(9)6(2-3-8)4-7(10)11/h3,6H,2,4H2,1H3,(H,10,11)	J15	1.99e-05	0.00223092	0.001328	0.000248816	1.45283e-05
556	C626CO3H	174.151	C626O2 + OH+ C626O2 + OH	O=CCC(CC(=O)OO)C(=O)C	InChI=1S/C7H10O5/c1-5(9)6(2-3-8)4-7(10)12-11/h3,6,11H,2,4H2,1H3	J41+J15	2.569e-05	0.00288002	0.001616	0.000310263	1.7679e-05
557	C626NO3	175.139	C626O + NO2	O=CCC(CO[N+](=O)[O-])C(=O)C	InChI=1S/C6H9NO5/c1-5(9)6(2-3-8)4-12-7(10)11/h3,6H,2,4H2,1H3	J53	1.79e-06	0.000200671	0.00686	0.000743056	7.50484e-05
558	C626OOH	146.141	C626O + OH+ C626O + OH	OOCC(CC=O)C(=O)C	InChI=1S/C6H10O4/c1-5(8)6(2-3-7)4-10-9/h3,6,9H,2,4H2,1H3	J41+J15	2.569e-05	0.00288002	0.00320125	0.000431653	3.50217e-05
559	C627OH	130.142	CO2C4CO3 + HCHO + HO2	CC(=O)CCC(=O)CO	InChI=1S/C6H10O3/c1-5(8)2-3-6(9)4-7/h7H,2-4H2,1H3	J22.*2	7.96e-06	0.000892368	0.000866	0.000610092	9.47404e-06
560	C627OOH	146.141	C627O + OH+ CO2C4CO3 + HCHO + OH	OOCC(=O)CCC(=O)C	InChI=1S/C6H10O4/c1-5(7)2-3-6(8)4-10-9/h9H,2-4H2,1H3	J41+J22.*2	1.375e-05	0.00154146	0.00142425	0.000610244	1.55813e-05
561	C628OH	146.141	CO13C4OH + CH3CO3 + HO2+ CO13C4OH + CH3CO3 + HO2	O=CCC(O)(CO)C(=O)C	InChI=1S/C6H10O4/c1-5(9)6(10,4-8)2-3-7/h3,8,10H,2,4H2,1H3	J22+J15	2.388e-05	0.0026771	0.002643	0.000431438	2.89144e-05
562	C628OOH	162.141	C628O + OH+ CO13C4OH + CH3CO3 + OH+ CO13C4OH + CH3CO3 + OH	O=CCC(CO)(OO)C(=O)C	InChI=1S/C6H10O5/c1-5(9)6(4-8,11-10)2-3-7/h3,8,10H,2,4H2,1H3	J41+J22+J15	2.967e-05	0.0033262	0.00318054	0.000431653	3.47951e-05
563	C629OH	146.141	HO1CO34C5 + CO + HO2 + HO2+ HO1CO3CHO + CH3CO3 + HO2	OCCC(O)(C=O)C(=O)C	InChI=1S/C6H10O4/c1-5(9)6(10,4-8)2-3-7/h4,7,10H,2-3H2,1H3	J15+J22	2.388e-05	0.0026771	0.002643	0.000431438	2.89144e-05
564	C629OOH	162.141	C629O + OH+ HO1CO34C5 + CO + HO2 + OH+ HO1CO3CHO + CH3CO3 + OH	OCCC(OO)(C=O)C(=O)C	InChI=1S/C6H10O5/c1-5(9)6(4-8,11-10)2-3-7/h4,7,10H,2-3H2,1H3	J41+J15+J22	2.967e-05	0.0033262	0.00318054	0.000431653	3.47951e-05
565	C62CHO	158.152	C45IC5CHO + HO2 + CO + HO2+ IPRCO3 + CO + GLYOX + OH+ IPRCO3 + HCOCOHCO3	O=CC(O)C(=O)C(=O)C(C)C	InChI=1S/C7H10O4/c1-4(2)6(10)7(11)5(9)3-8/h3-5,9H,1-2H3	J15+J22+J35	0.00029188	0.0327216	0.0296489	0.00762591	0.000324359
566	C62CO3H	190.151	C45IC5CHO + HO2 + OH+ C45IC5CHO + HO2 + OH+ C45IC5CHO + HO2 + OH	OOC(=O)C(O)C(=O)C(=O)C(C)C	InChI=1S/C7H10O6/c1-3(2)4(8)5(9)6(10)7(11)13-12/h3,6,10,12H,1-2H3	J41+J35+J22	0.00027777	0.0311398	0.0286943	0.00762411	0.000313916
567	C62NO335CO	175.139	CH3CHO + CO2C3CO3 + NO2+ CH3CHO + CO2C3CO3 + NO2	CC(=O)CC(=O)C(C)ON(=O)=O	InChI=1S/C6H9NO5/c1-4(8)3-6(9)5(2)12-7(10)11/h5H,3H2,1-2H3	J56.*1.6+J22	5.454e-05	0.00611429	0.005083	0.000859189	5.5608e-05
568	C62NO33CO	161.156	HEX3ONCO + NO2	CCCC(=O)C(C)ON(=O)=O	InChI=1S/C6H11NO4/c1-3-4-6(8)5(2)11-7(9)10/h5H,3-4H2,1-2H3	J56.*1.6	5.056e-05	0.0056681	0.00465	0.000743034	5.0871e-05
569	C62NO33OOH	179.171	C62NO33O + OH	CCCC(OO)C(C)ON(=O)=O	InChI=1S/C6H13NO5/c1-3-4-6(12-10)5(2)11-7(8)9/h5-6,10H,3-4H2,1-2H3	J41	5.79e-06	0.000649096	0.000750971	3.50652e-05	8.21562e-06
570	C62OOH	160.125	C62O + OH+ C62O + OH+ CH3CO3 + CO + MGLYOX + OH	OOC(C(=O)C)C(=O)C(=O)C	InChI=1S/C6H8O5/c1-3(7)5(9)6(11-10)4(2)8/h6,10H,1-2H3	J41+J22+J35	0.00027777	0.0311398	0.0296002	0.00763631	0.000323826
571	C630CO	128.126	C46CO3 + CO + HO2	OCCC(=C)C(=O)C=O	InChI=1S/C6H8O3/c1-5(2-3-7)6(9)4-8/h4,7H,1-3H2	J34	0.000125	0.0140133	0.1255	0.0120208	0.00137297
572	C630OOH	146.141	C630O + OH	OCCC(=C)C(=O)COO	InChI=1S/C6H10O4/c1-5(2-3-7)6(8)4-10-9/h7,9H,1-4H2	J41	5.79e-06	0.000649096	0.000871979	0.000141379	9.53945e-06
573	C63NO3	177.155	C63O + NO2	CCC(=O)CC(CO)ON(=O)=O	InChI=1S/C6H11NO5/c1-2-5(9)3-6(4-8)12-7(10)11/h6,8H,2-4H2,1H3	J22	3.98e-06	0.000446184	0.00465	0.000743034	5.0871e-05
574	C63NO32CO	161.156	HEX2ONCO + NO2	CCCC(ON(=O)=O)C(=O)C	InChI=1S/C6H11NO4/c1-3-4-6(5(2)8)11-7(9)10/h6H,3-4H2,1-2H3	J56.*1.6	5.056e-05	0.0056681	0.00465	0.000743034	5.0871e-05
575	C63NO32OOH	179.171	C63NO32O + OH	CCCC(ON(=O)=O)C(C)OO	InChI=1S/C6H13NO5/c1-3-4-6(5(2)12-10)11-7(8)9/h5-6,10H,3-4H2,1-2H3	J41	5.79e-06	0.000649096	0.000750971	3.50652e-05	8.21562e-06
576	C63OH	132.158	C63O + HO2	OCC(O)CC(=O)CC	InChI=1S/C6H12O3/c1-2-5(8)3-6(9)4-7/h6-7,9H,2-4H2,1H3	J22	3.98e-06	0.000446184	0.000433	0.0004314	4.73702e-06
577	C63OOH	148.157	C63O + OH+ C63O + OH	OCC(OO)CC(=O)CC	InChI=1S/C6H12O4/c1-2-5(8)3-6(4-7)10-9/h6-7,9H,2-4H2,1H3	J41+J22	9.77e-06	0.00109528	0.00097054	0.000431615	1.06177e-05
578	C64NO3	177.155	C64O + NO2	OCC(C)(CC(=O)C)ON(=O)=O	InChI=1S/C6H11NO5/c1-5(9)3-6(2,4-8)12-7(10)11/h8H,3-4H2,1-2H3	J22	3.98e-06	0.000446184	0.00465	0.000743034	5.0871e-05
579	C64NO335CO	175.139	C2H5CO3 + MGLYOX + NO2	CCC(=O)C(ON(=O)=O)C(=O)C	InChI=1S/C6H9NO5/c1-3-5(9)6(4(2)8)12-7(10)11/h6H,3H2,1-2H3	J56.*1.6	5.056e-05	0.0056681	0.005083	0.000859189	5.5608e-05
580	C64OH	132.158	C64O + HO2	CC(O)(CC(=O)C)CO	InChI=1S/C6H12O3/c1-5(8)3-6(2,9)4-7/h7,9H,3-4H2,1-2H3	J22	3.98e-06	0.000446184	0.000433	0.0004314	4.73702e-06
581	C64OH5OOH	134.174	C64OH5O + OH	CC(OO)C(O)CCC	InChI=1S/C6H14O3/c1-3-4-6(7)5(2)9-8/h5-8H,3-4H2,1-2H3	J41	5.79e-06	0.000649096	0.00053754	1.36143e-05	5.88069e-06
582	C64OOH	148.157	C64O + OH+ C64O + OH	OCC(C)(OO)CC(=O)C	InChI=1S/C6H12O4/c1-5(8)3-6(2,4-7)10-9/h7,9H,3-4H2,1-2H3	J41+J22	9.77e-06	0.00109528	0.00097054	0.000431615	1.06177e-05
583	C65NO36CHO	161.156	C4H9CHO + HO2 + CO + NO2+ HO2 + CO + C4H9CHO + NO2	CCCCC(C=O)ON(=O)=O	InChI=1S/C6H11NO4/c1-2-3-4-6(5-8)11-7(9)10/h5-6H,2-4H2,1H3	J56.*10+J15	0.0003359	0.0376566	0.0150088	0.00133492	0.000164196
584	C65NO3CO3H	193.155	C4H9CHO + NO2 + OH	CCCCC(ON(=O)=O)C(=O)OO	InChI=1S/C6H11NO6/c1-2-3-4-5(6(8)13-11)12-7(9)10/h5,11H,2-4H2,1H3	J41	5.79e-06	0.000649096	0.00465	0.000743034	5.0871e-05
585	C65OH	130.142	CO24C5 + HO2 + HO2 + CO	O=CC(C)(O)CC(=O)C	InChI=1S/C6H10O3/c1-5(8)3-6(2,9)4-7/h4,9H,3H2,1-2H3	J17	5.5e-05	0.00616586	0.002643	0.000431438	2.89144e-05
586	C65OH4OOH	134.174	C65OH4O + OH	CCCC(OO)C(C)O	InChI=1S/C6H14O3/c1-3-4-6(9-8)5(2)7/h5-8H,3-4H2,1-2H3	J41	5.79e-06	0.000649096	0.00053754	1.36143e-05	5.88069e-06
587	C65OOH	146.141	C65O + OH+ CO24C5 + OH + HO2 + CO	OOC(C)(C=O)CC(=O)C	InChI=1S/C6H10O4/c1-5(8)3-6(2,4-7)10-9/h4,9H,3H2,1-2H3	J41+J17	6.079e-05	0.00681495	0.00320125	0.000431653	3.50217e-05
588	C66CO	130.142	IPRCO3 + CH3CO3	CC(CO)C(=O)C(=O)C	InChI=1S/C6H10O3/c1-4(3-7)6(9)5(2)8/h4,7H,3H2,1-2H3	J35	0.000268	0.0300445	0.0286089	0.00762411	0.000312982
589	C66NO35CO	161.156	C4H9CO3 + HCHO + NO2	CCCCC(=O)CON(=O)=O	InChI=1S/C6H11NO4/c1-2-3-4-6(8)5-11-7(9)10/h2-5H2,1H3	J56	3.16e-05	0.00354256	0.00465	0.000743034	5.0871e-05
590	C66NO35OOH	179.171	C66NO35O + OH	CCCCC(OO)CON(=O)=O	InChI=1S/C6H13NO5/c1-2-3-4-6(12-10)5-11-7(8)9/h6,10H,2-5H2,1H3	J41	5.79e-06	0.000649096	0.000750971	3.50652e-05	8.21562e-06
591	C66OH	132.158	CH3CHO + HOIPRCO3 + HO2	OCC(C)C(=O)C(C)O	InChI=1S/C6H12O3/c1-4(3-7)6(9)5(2)8/h4-5,7-8H,3H2,1-2H3	J22	3.98e-06	0.000446184	0.000433	0.0004314	4.73702e-06
592	C66OOH	148.157	C66O + OH+ CH3CHO + HOIPRCO3 + OH	OCC(C)C(=O)C(C)OO	InChI=1S/C6H12O4/c1-4(3-7)6(8)5(2)10-9/h4-5,7,9H,3H2,1-2H3	J41+J22	9.77e-06	0.00109528	0.00097054	0.000431615	1.06177e-05
593	C67CHO	130.142	C55O2 + HO2 + CO	O=CCC(=O)C(C)(C)O	InChI=1S/C6H10O3/c1-6(2,9)5(8)3-4-7/h4,9H,3H2,1-2H3	J15	1.99e-05	0.00223092	0.002643	0.000431438	2.89144e-05
594	C67CO3H	162.141	C55O2 + OH+ C55O2 + OH	OOC(=O)CC(=O)C(C)(C)O	InChI=1S/C6H10O5/c1-6(2,9)4(7)3-5(8)11-10/h9-10H,3H2,1-2H3	J41+J22	9.77e-06	0.00109528	0.000518369	0.0004314	5.67096e-06
595	C67NO3	177.155	C67O + NO2	O=CCC(ON(=O)=O)C(C)(C)O	InChI=1S/C6H11NO5/c1-6(2,9)5(3-4-8)12-7(10)11/h4-5,9H,3H2,1-2H3	J15	1.99e-05	0.00223092	0.0150088	0.00133492	0.000164196
596	C67OH	132.158	C67O + HO2	O=CCC(O)C(C)(C)O	InChI=1S/C6H12O3/c1-6(2,9)5(8)3-4-7/h4-5,8-9H,3H2,1-2H3	J15	1.99e-05	0.00223092	0.00221	5.72e-06	2.41774e-05
597	C67OOH	148.157	C67O + OH+ C67O + OH	O=CCC(OO)C(C)(C)O	InChI=1S/C6H12O4/c1-6(2,8)5(10-9)3-4-7/h4-5,8-9H,3H2,1-2H3	J41+J15	2.569e-05	0.00288002	0.00274754	1.47671e-05	3.00581e-05
598	C68NO3	177.155	C68O + NO2	O=CCC(C)(ON(=O)=O)C(C)O	InChI=1S/C6H11NO5/c1-5(9)6(2,3-4-8)12-7(10)11/h4-5,9H,3H2,1-2H3	J15	1.99e-05	0.00223092	0.0150088	0.00133492	0.000164196
599	C68OH	132.158	C68O + HO2	CC(O)(CC=O)C(C)O	InChI=1S/C6H12O3/c1-5(8)6(2,9)3-4-7/h4-5,8-9H,3H2,1-2H3	J15	1.99e-05	0.00223092	0.00221	5.72e-06	2.41774e-05
600	C68OOH	148.157	C68O + OH+ C68O + OH	O=CCC(C)(OO)C(C)O	InChI=1S/C6H12O4/c1-5(8)6(2,10-9)3-4-7/h4-5,8-9H,3H2,1-2H3	J41+J15	2.569e-05	0.00288002	0.00274754	1.47671e-05	3.00581e-05
601	C69OH	132.158	C69O + HO2	OCC(=O)C(C)C(C)O	InChI=1S/C6H12O3/c1-4(5(2)8)6(9)3-7/h4-5,7-8H,3H2,1-2H3	J22	3.98e-06	0.000446184	0.000433	0.0004314	4.73702e-06
602	C69OOH	148.157	C69O + OH+ C69O + OH	OOCC(=O)C(C)C(C)O	InChI=1S/C6H12O4/c1-4(5(2)7)6(8)3-10-9/h4-5,7,9H,3H2,1-2H3	J41+J22	9.77e-06	0.00109528	0.00097054	0.000431615	1.06177e-05
603	C6CO134OOH	160.125	C5CO23O2 + OH	OOC(=O)CC(=O)C(=O)CC	InChI=1S/C6H8O5/c1-2-4(7)5(8)3-6(9)11-10/h10H,2-3H2,1H3	J41	5.79e-06	0.000649096	0.0286943	0.00762411	0.000313916
604	C6CO23HO5	130.142	HO2C3CO3 + CH3CO3	CC(O)CC(=O)C(=O)C	InChI=1S/C6H10O3/c1-4(7)3-6(9)5(2)8/h4,7H,3H2,1-2H3	J35	0.000268	0.0300445	0.0286089	0.00762411	0.000312982
605	C6CO243OH	130.142	EGLYOX + CH3CO3 + HO2+ MGLYOX + C2H5CO3 + HO2	CCC(=O)C(O)C(=O)C	InChI=1S/C6H10O3/c1-3-5(8)6(9)4(2)7/h6,9H,3H2,1-2H3	J22+J22	7.96e-06	0.000892368	0.000866	0.000610092	9.47404e-06
606	C6CO2M2OH	146.141	C5CO243OH + HO2 + CO + HO2+ C5CO243OH + HO2 + CO + HO2	O=CC(C)(O)C(O)C(=O)C	InChI=1S/C6H10O4/c1-4(8)5(9)6(2,10)3-7/h3,5,9-10H,1-2H3	J22+J17	5.898e-05	0.00661204	0.002643	0.000431438	2.89144e-05
607	C6CO2OHOOH	162.141	C5CO243OH + OH + HO2 + CO+ C5MCO2OHO + OH+ C5MCO2OHO + OH	OOC(C)(C=O)C(O)C(=O)C	InChI=1S/C6H10O5/c1-4(8)5(9)6(2,3-7)11-10/h3,5,9-10H,1-2H3	J17+J41+J22	6.477e-05	0.00726114	0.00318054	0.000431653	3.47951e-05
608	C6CO34	114.142	C2H5CO3 + C2H5CO3	CCC(=O)C(=O)CC	InChI=1S/C6H10O2/c1-3-5(7)6(8)4-2/h3-4H2,1-2H3	J35	0.000268	0.0300445	0.0286089	0.00762411	0.000312982
609	C6CO34HO1	130.142	C2H5CO3 + HOC2H4CO3	OCCC(=O)C(=O)CC	InChI=1S/C6H10O3/c1-2-5(8)6(9)3-4-7/h7H,2-4H2,1H3	J35	0.000268	0.0300445	0.0286089	0.00762411	0.000312982
610	C6CO34OOH	146.141	C6CO34O + OH+ C6CO34O + OH	CC(OO)C(=O)C(=O)CC	InChI=1S/C6H10O4/c1-3-5(7)6(8)4(2)10-9/h4,9H,3H2,1-2H3	J41+J35	0.00027379	0.0306936	0.0291672	0.00762412	0.000319089
611	C6CO3HO14	132.158	C2H5CHO + HOC2H4CO3 + HO2	OCCC(=O)C(O)CC	InChI=1S/C6H12O3/c1-2-5(8)6(9)3-4-7/h5,7-8H,2-4H2,1H3	J22	3.98e-06	0.000446184	0.000433	0.0004314	4.73702e-06
612	C6CO3HO25	132.158	IPROPOLO2 + CH3CHOHCO3	CC(O)CC(=O)C(C)O	InChI=1S/C6H12O3/c1-4(7)3-6(9)5(2)8/h4-5,7-8H,3H2,1-2H3	J22	3.98e-06	0.000446184	0.000433	0.0004314	4.73702e-06
613	C6CO3HO4	116.158	C2H5CO3 + C2H5CHO + HO2	CCC(=O)C(O)CC	InChI=1S/C6H12O2/c1-3-5(7)6(8)4-2/h5,7H,3-4H2,1-2H3	J22	3.98e-06	0.000446184	0.000433	0.0004314	4.73702e-06
614	C6CO3MOH	144.125	CHOMOHCO3 + CH3CO3	O=CC(C)(O)C(=O)C(=O)C	InChI=1S/C6H8O4/c1-4(8)5(9)6(2,10)3-7/h3,10H,1-2H3	J35	0.000268	0.0300445	0.0308189	0.00762411	0.000337159
615	C6CO3OHOOH	148.157	C6CO3OH5O + OH+ C6CO3OH5O + OH	OOC(C)C(=O)CC(C)O	InChI=1S/C6H12O4/c1-4(7)3-6(8)5(2)10-9/h4-5,7,9H,3H2,1-2H3	J41+J22	9.77e-06	0.00109528	0.00097054	0.000431615	1.06177e-05
616	C6CO4DB	140.094	C4CO2DBCO3 + HO2 + CO	O=CC(=O)C=CC(=O)C=O	InChI=1S/C6H4O4/c7-3-5(9)1-2-6(10)4-8/h1-4H	J34.*2	0.00025	0.0280266	0.128044	0.0120216	0.00140081
617	C6CO4M2DB	168.147	C4DBM2CO3 + HO2 + CO	O=CC(=O)C(=C(C)C(=O)C=O)C	InChI=1S/C8H8O4/c1-5(7(11)3-9)6(2)8(12)4-10/h3-4H,1-2H3	J34.*2	0.00025	0.0280266	0.126122	0.0120231	0.00137978
618	C6CO4MEDB	182.173	C4DBMECO3 + HO2 + CO	O=CC(=O)C(=C(C)C(=O)C=O)CC	InChI=1S/C9H10O4/c1-3-7(9(13)5-11)6(2)8(12)4-10/h4-5H,3H2,1-2H3	J34.*2	0.00025	0.0280266	0.126122	0.0120231	0.00137978
619	C6COALCO2H	144.125	C5COCHOO2 + HO2+ C5COCHOO2 + HO2	O=CCCC(=O)CC(=O)O	InChI=1S/C6H8O4/c7-3-1-2-5(8)4-6(9)10/h3H,1-2,4H2,(H,9,10)	J22+J15	2.388e-05	0.0026771	0.002643	0.000431438	2.89144e-05
620	C6COALCO3H	160.125	C5COCHOO2 + OH+ C5COCHOO2 + OH	O=CCCC(=O)CC(=O)OO	InChI=1S/C6H8O5/c7-3-1-2-5(8)4-6(9)11-10/h3,10H,1-2,4H2	J41+J22	9.77e-06	0.00109528	0.00272837	0.000431438	2.98484e-05
621	C6COCHOOOH	146.141	C6COCHOO + OH+ C6COCHOO + OH+ C6COCHOO + OH	OOCCCC(=O)CC=O	InChI=1S/C6H10O4/c7-4-3-6(8)2-1-5-10-9/h4,9H,1-3,5H2	J41+J15+J22	2.967e-05	0.0033262	0.00320125	0.000431653	3.50217e-05
622	C6CODIAL	128.126	C5COCHOO2 + HO2 + CO+ CHOC2H4O2 + HCOCH2CO3	O=CCCC(=O)CC=O	InChI=1S/C6H8O3/c7-4-1-2-6(9)3-5-8/h4-5H,1-3H2	J15.*2+J22	4.378e-05	0.00490802	0.004853	0.000431476	5.30918e-05
623	C6COHOCHO	130.142	HCOCH2CO3 + HO1C3O2+ HCOCH2CO3 + HO1C3O2	OCCCC(=O)CC=O	InChI=1S/C6H10O3/c7-4-1-2-6(9)3-5-8/h5,7H,1-4H2	J22+J15	2.388e-05	0.0026771	0.002643	0.000431438	2.89144e-05
624	C6CONO34OH	177.155	HO3C3CHO + CH3CO3 + NO2	CCC(O)C(ON(=O)=O)C(=O)C	InChI=1S/C6H11NO5/c1-3-5(9)6(4(2)8)12-7(10)11/h5-6,9H,3H2,1-2H3	J22	3.98e-06	0.000446184	0.00465	0.000743034	5.0871e-05
625	C6CONO3OOH	193.155	C6NO3CO5O + OH+ C6NO3CO5O + OH	OOC(C)CC(=O)C(C)ON(=O)=O	InChI=1S/C6H11NO6/c1-4(13-11)3-6(8)5(2)12-7(9)10/h4-5,11H,3H2,1-2H3	J41+J56.*1.6	5.635e-05	0.0063172	0.00520825	0.000743159	5.69783e-05
626	C6COOHCO3H	188.135	C5134CO2OH + HO2 + CO + OH	CC(=CC(=O)OO)C(=O)C(O)C=O	InChI=1S/C7H8O6/c1-4(2-6(10)13-12)7(11)5(9)3-8/h2-3,5,9,12H,1H3	J41	5.79e-06	0.000649096	0.00166244	0.000285853	1.81871e-05
627	C6CYTONOOH	158.109	C6CYTONO + OH+ C6CYTONO + OH	OOC1C(=O)CC(=O)CC1=O	InChI=1S/C6H6O5/c7-3-1-4(8)6(11-10)5(9)2-3/h6,10H,1-2H2	J41+J22	9.77e-06	0.00109528	0.0038371	0.000610244	4.19778e-05
628	C6DCRBBOH	128.126	HCOCO2H + C2H5CO3 + HO2 + CO	CCC(=O)C=CC(=O)O	InChI=1S/C6H8O3/c1-2-5(7)3-4-6(8)9/h3-4H,2H2,1H3,(H,8,9)	J24	1.8e-06	0.000201792	0.000334439	0.000140722	3.65876e-06
629	C6DCRBBOOH	144.125	C6DCARBBO + OH	CCC(=O)C=CC(=O)OO	InChI=1S/C6H8O4/c1-2-5(7)3-4-6(8)10-9/h3-4,9H,2H2,1H3	J20.*2	0.001128	0.126456	0.000419808	0.000140722	4.5927e-06
630	C6DIAL	114.142	CHOC4O2 + HO2 + CO	O=CCCCCC=O	InChI=1S/C6H10O2/c7-5-3-1-2-4-6-8/h5-6H,1-4H2	J15	1.99e-05	0.00223092	0.00442	8.0893e-06	4.83548e-05
631	C6DIALOH	130.142	CHOC4OHO2 + HO2 + CO	O=CCCC(O)CC=O	InChI=1S/C6H10O3/c7-4-1-2-6(9)3-5-8/h4-6,9H,1-3H2	J15	1.99e-05	0.00223092	0.00442	8.0893e-06	4.83548e-05
632	C6DIALOOH	146.141	C6DIALO + OH+ C6DIALO + OH	O=CCCC(OO)CC=O	InChI=1S/C6H10O4/c7-4-1-2-6(10-9)3-5-8/h4-6,9H,1-3H2	J41+J15.*2	4.559e-05	0.00511093	0.00497825	1.58362e-05	5.44621e-05
633	C6DICARB	112.126	C6DCARBBO2 + HO2 + CO+ EBFUONE	CCC(=O)C=CC=O	InChI=1S/C6H8O2/c1-2-6(8)4-3-5-7/h3-5H,2H2,1H3	J4.*0.2.*0.6+J4.*0.2.*0.4	0.001784	0.199998	0.00254444	0.000140838	2.78362e-05
634	C6DICAROOH	162.141	C32OH13CO + C2H5CO3 + OH+ C6DICARBO + OH+ C6DICARBO + OH	OOC(C(O)C=O)C(=O)CC	InChI=1S/C6H10O5/c1-2-4(8)6(11-10)5(9)3-7/h3,5-6,9-10H,2H2,1H3	J22+J41+J15	2.967e-05	0.0033262	0.00318054	0.000431653	3.47951e-05
635	C6EO2HCO3H	216.188	C5CO3OH + C2H5CO3 + OH	CCC(=CC(=O)C(O)C(=O)C)C(=O)OO	InChI=1S/C9H12O6/c1-3-6(9(13)15-14)4-7(11)8(12)5(2)10/h4,8,12,14H,3H2,1-2H3	J41	5.79e-06	0.000649096	0.000707808	0.000232715	7.74342e-06
636	C6ETCO4DB	168.147	C7CO2DBCO3 + HO2 + CO	O=CC(=O)C=C(CC)C(=O)C=O	InChI=1S/C8H8O4/c1-2-6(8(12)5-10)3-7(11)4-9/h3-5H,2H2,1H3	J34.*2	0.00025	0.0280266	0.127672	0.0120335	0.00139674
637	C6H13CHO	114.186	HO2 + CO + HEXAO2	CCCCCCC=O	InChI=1S/C7H14O/c1-2-3-4-5-6-7-8/h7H,2-6H2,1H3	J15	1.99e-05	0.00223092	0.00104	0.000166	1.13776e-05
638	C6H13CO3H	146.184	HEXAO2 + OH	CCCCCCC(=O)OO	InChI=1S/C7H14O3/c1-2-3-4-5-6-7(8)10-9/h9H,2-6H2,1H3	J41	5.79e-06	0.000649096	8.5369e-05	NaN	9.33937e-07
639	C6H5C2CO3H	152.147	C6H5CH2O2 + OH	OOC(=O)Cc1ccccc1	InChI=1S/C8H8O3/c9-8(11-10)6-7-4-2-1-3-5-7/h1-5,10H,6H2	J41	5.79e-06	0.000649096	8.5369e-05	NaN	9.33937e-07
640	C6H5C2NO3	167.162	C6H5C2H4O + NO2	O=N(=O)OCCc1ccccc1	InChI=1S/C8H9NO3/c10-9(11)12-7-6-8-4-2-1-3-5-8/h1-5H,6-7H2	J53	1.79e-06	0.000200671	6.8088e-05	3.23144e-05	7.44882e-07
641	C6H5C2OOH	138.164	C6H5C2H4O + OH	OOCCc1ccccc1	InChI=1S/C8H10O2/c9-10-7-6-8-4-2-1-3-5-8/h1-5,9H,6-7H2	J41	5.79e-06	0.000649096	0.000558251	1.36143e-05	6.10727e-06
642	C6H5CH2CHO	120.148	C6H5CH2O2 + HO2 + CO	O=CCc1ccccc1	InChI=1S/C8H8O/c9-7-6-8-4-2-1-3-5-8/h1-5,7H,6H2	J17	5.5e-05	0.00616586	0.001838	0.000533732	2.01077e-05
643	C6H5CH2NO3	153.135	C6H5CH2O + NO2	O=N(=O)OCc1ccccc1	InChI=1S/C7H7NO3/c9-8(10)11-6-7-4-2-1-3-5-7/h1-5H,6H2	J53	1.79e-06	0.000200671	6.8088e-05	3.23144e-05	7.44882e-07
644	C6H5CH2OOH	124.137	C6H5CH2O + OH	OOCc1ccccc1	InChI=1S/C7H8O2/c8-9-6-7-4-2-1-3-5-7/h1-5,8H,6H2	J41	5.79e-06	0.000649096	0.000558251	1.36143e-05	6.10727e-06
645	C6H5CO3H	138.121	C6H5O2 + OH	OOC(=O)c1ccccc1	InChI=1S/C7H6O3/c8-7(10-9)6-4-2-1-3-5-6/h1-5,9H	J41	5.79e-06	0.000649096	8.5369e-05	NaN	9.33937e-07
646	C6H5OOH	110.111	C6H5O + OH	OOc1ccccc1	InChI=1S/C6H6O2/c7-8-6-4-2-1-3-5-6/h1-5,7H	J41	5.79e-06	0.000649096	0.000558251	1.36143e-05	6.10727e-06
647	C6HOCOOOH	148.157	C2H5CHO + HOC2H4CO3 + OH+ C6HO1CO3O + OH	OCCC(=O)C(CC)OO	InChI=1S/C6H12O4/c1-2-6(10-9)5(8)3-4-7/h6-7,9H,2-4H2,1H3	J22+J41	9.77e-06	0.00109528	0.00097054	0.000431615	1.06177e-05
648	C6IPRCO4DB	182.173	C8DBCO2CO3 + HO2 + CO	O=CC(=O)C=C(C(C)C)C(=O)C=O	InChI=1S/C9H10O4/c1-6(2)8(9(13)5-11)3-7(12)4-10/h3-6H,1-2H3	J34.*2	0.00025	0.0280266	0.127672	0.0120335	0.00139674
649	C6M5CO2OH	142.153	C3MDIALOH + CH3CO3 + HO2 + CO+ C3MDIALOH + CH3CO3 + HO2 + CO+ HO2 + CO + C4DBDIKET + HO2	O=CC(C)(O)C=CC(=O)C	InChI=1S/C7H10O3/c1-6(9)3-4-7(2,10)5-8/h3-5,10H,1-2H3	J23+J24+J17	5.86e-05	0.00656944	0.00137444	0.00021762	1.50364e-05
650	C6M5CO2OOH	158.152	C3MDIALOOH + CH3CO3 + HO2 + CO+ C3MDIALOOH + CH3CO3 + HO2 + CO+ C6M5CO2O + OH+ HO2 + CO + C4DBDIKET + OH	OOC(C)(C=O)C=CC(=O)C	InChI=1S/C7H10O4/c1-6(9)3-4-7(2,5-8)11-10/h3-5,10H,1-2H3	J23+J24+J41+J17	6.439e-05	0.00721854	0.00193269	0.000218046	2.11436e-05
651	C6MOCOCO3H	202.161	DMKCOOH + HO2 + CO + OH	CC(=CC(=O)OO)C(=O)C(O)C(=O)C	InChI=1S/C8H10O6/c1-4(3-6(10)14-13)7(11)8(12)5(2)9/h3,8,12-13H,1-2H3	J41	5.79e-06	0.000649096	0.000910439	0.000297506	9.9602e-06
652	C6NO324CO	175.139	C3NO3COO2 + C2H5CO3+ CO3C4CO3 + HCHO + NO2	CCC(=O)CC(=O)CON(=O)=O	InChI=1S/C6H9NO5/c1-2-5(8)3-6(9)4-12-7(10)11/h2-4H2,1H3	J22+J56	3.558e-05	0.00398875	0.005083	0.000859189	5.5608e-05
653	C6NO3CO4OH	177.155	CO2HOC61O + NO2	CCC(O)CC(=O)CON(=O)=O	InChI=1S/C6H11NO5/c1-2-5(8)3-6(9)4-12-7(10)11/h5,8H,2-4H2,1H3	J56	3.16e-05	0.00354256	0.00465	0.000743034	5.0871e-05
654	C6NO3CO5OH	177.155	C6CO3OH5O + NO2	CC(O)CC(=O)C(C)ON(=O)=O	InChI=1S/C6H11NO5/c1-4(8)3-6(9)5(2)12-7(10)11/h4-5,8H,3H2,1-2H3	J56.*1.6	5.056e-05	0.0056681	0.00465	0.000743034	5.0871e-05
655	C6NO3COOOH	193.155	MNO3COC4O + OH+ MNO3COC4O + OH	CCC(OO)CC(=O)CON(=O)=O	InChI=1S/C6H11NO6/c1-2-6(13-11)3-5(8)4-12-7(9)10/h6,11H,2-4H2,1H3	J41+J56	3.739e-05	0.00419166	0.00520825	0.000743159	5.69783e-05
656	C6O132OH	130.142	C3H7CO3 + GLYOX + HO2+ PGLYOX + HO2 + HO2 + CO	CCCC(=O)C(O)C=O	InChI=1S/C6H10O3/c1-2-3-5(8)6(9)4-7/h4,6,9H,2-3H2,1H3	J22+J17	5.898e-05	0.00661204	0.002643	0.000431438	2.89144e-05
657	C6O4KETOOH	190.108	OH + C6O4KETO	CC(=O)C(=O)OC(=O)C(=O)COO	InChI=1S/C6H6O7/c1-3(7)5(9)13-6(10)4(8)2-12-11/h11H,2H2,1H3	J41	5.79e-06	0.000649096	0.0577761	0.0107821	0.000632071
658	C6OH5OOH	134.174	C6OH5O + OH	CCCCC(CO)OO	InChI=1S/C6H14O3/c1-2-3-4-6(5-7)9-8/h6-8H,2-5H2,1H3	J41	5.79e-06	0.000649096	0.00053754	1.36143e-05	5.88069e-06
659	C6OTKETCO	158.109	CH3CO3 + CO + CH3CO3	O=C(OC(=O)C(=O)C)C(=O)C	InChI=1S/C6H6O5/c1-3(7)5(9)11-6(10)4(2)8/h1-2H3	J22	3.98e-06	0.000446184	0.0312519	0.0076363	0.000341896
660	C6OTKETOOH	176.124	OH + C6OTKETO	OOC(OC(=O)C(=O)C)C(=O)C	InChI=1S/C6H8O6/c1-3(7)5(9)11-6(12-10)4(2)8/h6,10H,1-2H3	J41	5.79e-06	0.000649096	0.0296002	0.00763631	0.000323826
661	C6OTRIKET	144.125	CH3CO3 + CH3COCH2O2	CC(=O)COC(=O)C(=O)C	InChI=1S/C6H8O4/c1-4(7)3-10-6(9)5(2)8/h3H2,1-2H3	J22	3.98e-06	0.000446184	0.0290419	0.0076363	0.000317719
662	C6PRCO4DB	182.173	C8CO2DBCO3 + HO2 + CO	CCCC(=CC(=O)C=O)C(=O)C=O	InChI=1S/C9H10O4/c1-2-3-7(9(13)6-11)4-8(12)5-10/h4-6H,2-3H2,1H3	J34.*2	0.00025	0.0280266	0.127672	0.0120335	0.00139674
663	C6TONOHOOH	176.124	C6TRONOHO + OH+ C6TRONOHO + OH+ C6TRONOHO + OH	OOC(CC=O)C(=O)C(=O)CO	InChI=1S/C6H8O6/c7-2-1-5(12-11)6(10)4(9)3-8/h2,5,8,11H,1,3H2	J15+J35+J41	0.00029369	0.0329246	0.0313565	0.00762412	0.00034304
664	C710OOH	146.184	C710O + OH+ C710O + OH	CCC(C)(OO)CC(=O)C	InChI=1S/C7H14O3/c1-4-7(3,10-9)5-6(2)8/h9H,4-5H2,1-3H3	J41+J22	9.77e-06	0.00109528	0.000846251	0.000185846	9.25799e-06
665	C711OOH	162.184	C711O + OH+ C711O + OH	CC(O)(CC(=O)COO)CC	InChI=1S/C7H14O4/c1-3-7(2,9)4-6(8)5-11-10/h9-10H,3-5H2,1-2H3	J41+J22	9.77e-06	0.00109528	0.00082554	0.000185846	9.03141e-06
666	C712NO3	191.182	C712O + NO2	CC(=O)CC(C)(ON(=O)=O)C(C)O	InChI=1S/C7H13NO5/c1-5(9)4-7(3,6(2)10)13-8(11)12/h6,10H,4H2,1-3H3	J22	3.98e-06	0.000446184	0.00465	0.000743034	5.0871e-05
667	C712OH	146.184	CH3COCH2O2 + HO2CO4C5 + HO2	CC(=O)CC(C)(O)C(C)O	InChI=1S/C7H14O3/c1-5(8)4-7(3,10)6(2)9/h6,9-10H,4H2,1-3H3	J22	3.98e-06	0.000446184	0.000288	0.000185347	3.15072e-06
668	C712OOH	162.184	C712O + OH+ CH3COCH2O2 + HO2CO4C5 + OH	OOC(C)(CC(=O)C)C(C)O	InChI=1S/C7H14O4/c1-5(8)4-7(3,11-10)6(2)9/h6,9-10H,4H2,1-3H3	J41+J22	9.77e-06	0.00109528	0.00082554	0.000185846	9.03141e-06
669	C713OH	144.168	CH3CO3 + CO24C5 + HO2	CC(=O)CC(C)(O)C(=O)C	InChI=1S/C7H12O3/c1-5(8)4-7(3,10)6(2)9/h10H,4H2,1-3H3	J22.*2	7.96e-06	0.000892368	0.000576	0.00026212	6.30144e-06
670	C713OOH	160.168	C713O + OH+ CH3CO3 + CO24C5 + OH	OOC(C)(CC(=O)C)C(=O)C	InChI=1S/C7H12O4/c1-5(8)4-7(3,11-10)6(2)9/h10H,4H2,1-3H3	J41+J22.*2	1.375e-05	0.00154146	0.00113425	0.000262474	1.24087e-05
671	C714OH	144.168	CH3CO3 + CO2C43CHO + HO2	CC(=O)C(O)C(C)C(=O)C	InChI=1S/C7H12O3/c1-4(5(2)8)7(10)6(3)9/h4,7,10H,1-3H3	J22.*2	7.96e-06	0.000892368	0.000576	0.00026212	6.30144e-06
672	C714OOH	160.168	C714O + OH+ CH3CO3 + CO2C43CHO + OH	OOC(C(=O)C)C(C)C(=O)C	InChI=1S/C7H12O4/c1-4(5(2)8)7(11-10)6(3)9/h4,7,10H,1-3H3	J41+J22.*2	1.375e-05	0.00154146	0.00113425	0.000262474	1.24087e-05
673	C715CO2OH	142.153	C6DICARB + CO + HO2 + HO2+ C6DICARB + CO + HO2 + HO2+ C6DICARB + CO + HO2 + HO2	O=CC(O)C=CC(=O)CC	InChI=1S/C7H10O3/c1-2-6(9)3-4-7(10)5-8/h3-5,7,10H,2H2,1H3	J17+J23+J24	5.86e-05	0.00656944	0.00137444	0.00021762	1.50364e-05
674	C715CO2OOH	158.152	C6DICARB + CO + HO2 + OH+ C6DICARB + CO + HO2 + OH+ C715CO2O + OH+ C715CO2O + OH	OOC(C=O)C=CC(=O)CC	InChI=1S/C7H10O4/c1-2-6(9)3-4-7(5-8)11-10/h3-5,7,10H,2H2,1H3	J17+J23+J41+J24	6.439e-05	0.00721854	0.00193269	0.000218046	2.11436e-05
675	C715OOH	174.151	C715O + OH+ CH3CO3 + C5CO234 + OH	OOC(C)(C(=O)C)C(=O)C(=O)C	InChI=1S/C7H10O5/c1-4(8)6(10)7(3,12-11)5(2)9/h11H,1-3H3	J41+J22.*2	1.375e-05	0.00154146	0.0294552	0.00762637	0.00032224
676	C716OH	158.152	H3C25C6O2 + CO + HO2	O=CCC(=O)CC(O)C(=O)C	InChI=1S/C7H10O4/c1-5(9)7(11)4-6(10)2-3-8/h3,7,11H,2,4H2,1H3	J15	1.99e-05	0.00223092	0.001616	0.000310263	1.7679e-05
677	C716OOH	174.151	C716O + OH+ C716O + OH	O=CCC(=O)CC(OO)C(=O)C	InChI=1S/C7H10O5/c1-5(9)7(12-11)4-6(10)2-3-8/h3,7,11H,2,4H2,1H3	J41+J15	2.569e-05	0.00288002	0.00217425	0.000310561	2.37863e-05
678	C717NO3	203.149	C717O + NO2+ C717O + NO2	O=CCC(ON(=O)=O)CC(=O)C(=O)C	InChI=1S/C7H9NO6/c1-5(10)7(11)4-6(2-3-9)14-8(12)13/h3,6H,2,4H2,1H3	J54+J35	0.00027099	0.0303797	0.0436177	0.00774009	0.000477178
679	C717OH	158.152	C717O + HO2	O=CCC(O)CC(=O)C(=O)C	InChI=1S/C7H10O4/c1-5(9)7(11)4-6(10)2-3-8/h3,6,10H,2,4H2,1H3	J35	0.000268	0.0300445	0.0296489	0.00762591	0.000324359
680	C717OOH	174.151	C717O + OH+ C717O + OH	O=CCC(OO)CC(=O)C(=O)C	InChI=1S/C7H10O5/c1-5(9)7(10)4-6(12-11)2-3-8/h3,6,11H,2,4H2,1H3	J41+J35	0.00027379	0.0306936	0.0302072	0.00762593	0.000330467
681	C718CO2H	172.179	C718O2 + HO2	O=CC(C)(C)C(=O)CCC(=O)O	InChI=1S/C8H12O4/c1-8(2,5-9)6(10)3-4-7(11)12/h5H,3-4H2,1-2H3,(H,11,12)	J15	1.99e-05	0.00223092	0.002126	0.000564999	2.32584e-05
682	C718CO3H	188.178	C718O2 + OH+ C718O2 + OH	OOC(=O)CCC(=O)C(C)(C)C=O	InChI=1S/C8H12O5/c1-8(2,5-9)6(10)3-4-7(11)13-12/h5,12H,3-4H2,1-2H3	J41+J15	2.569e-05	0.00288002	0.00221137	0.000564999	2.41924e-05
683	C718NO3	189.166	C718O + NO2+ C718O + NO2	O=CC(C)(C)C(=O)CCON(=O)=O	InChI=1S/C7H11NO5/c1-7(2,5-9)6(10)3-4-13-8(11)12/h5H,3-4H2,1-2H3	J53+J15	2.169e-05	0.00243159	0.00569	0.000761351	6.22486e-05
684	C718OH	144.168	C718O + HO2	OCCC(=O)C(C)(C)C=O	InChI=1S/C7H12O3/c1-7(2,5-9)6(10)3-4-8/h5,8H,3-4H2,1-2H3	J15	1.99e-05	0.00223092	0.001328	0.000248816	1.45283e-05
685	C718OOH	160.168	C718O + OH+ C718O + OH	OOCCC(=O)C(C)(C)C=O	InChI=1S/C7H12O4/c1-7(2,5-8)6(9)3-4-11-10/h5,10H,3-4H2,1-2H3	J41+J15	2.569e-05	0.00288002	0.00188625	0.000249188	2.06356e-05
686	C719OOH	176.167	C719O + OH	OOC1(C)C(O)CC(=O)CC1O	InChI=1S/C7H12O5/c1-7(12-11)5(9)2-4(8)3-6(7)10/h5-6,9-11H,2-3H2,1H3	J41	5.79e-06	0.000649096	0.00082554	0.000185846	9.03141e-06
687	C71OOH	162.184	C71O + OH+ HO3C4CO3 + CH3CHO + OH	CCC(O)CC(=O)C(C)OO	InChI=1S/C7H14O4/c1-3-6(8)4-7(9)5(2)11-10/h5-6,8,10H,3-4H2,1-2H3	J41+J22	9.77e-06	0.00109528	0.00082554	0.000185846	9.03141e-06
688	C720NO3	173.167	C720O + NO2	O=N(=O)OC1CC=C(C)C(O)C1	InChI=1S/C7H11NO4/c1-5-2-3-6(4-7(5)9)12-8(10)11/h2,6-7,9H,3-4H2,1H3	J54	2.99e-06	0.000335198	6.8088e-05	3.23144e-05	7.44882e-07
689	C720OOH	144.168	C720O + OH	OOC1CC=C(C)C(O)C1	InChI=1S/C7H12O3/c1-5-2-3-6(10-9)4-7(5)8/h2,6-9H,3-4H2,1H3	J41	5.79e-06	0.000649096	0.00053754	1.36143e-05	5.88069e-06
690	C721CHO	156.179	C721O2 + CO + HO2	O=CC1CC(C(=O)O)C1(C)C	InChI=1S/C8H12O3/c1-8(2)5(4-9)3-6(8)7(10)11/h4-6H,3H2,1-2H3,(H,10,11)	J15	1.99e-05	0.00223092	0.001838	0.000533732	2.01077e-05
691	C721CO3H	188.178	C721O2 + OH	OOC(=O)C1CC(C(=O)O)C1(C)C	InChI=1S/C8H12O5/c1-8(2)4(6(9)10)3-5(8)7(11)13-12/h4-5,12H,3H2,1-2H3,(H,9,10)	J41	5.79e-06	0.000649096	8.5369e-05	NaN	9.33937e-07
692	C721OOH	160.168	C721O + OH	OOC1CC(C(=O)O)C1(C)C	InChI=1S/C7H12O4/c1-7(2)4(6(8)9)3-5(7)11-10/h4-5,10H,3H2,1-2H3,(H,8,9)	J41	5.79e-06	0.000649096	0.00053754	1.36143e-05	5.88069e-06
693	C722OOH	176.167	C722O + OH	O=CCC(C(=O)O)C(C)(C)OO	InChI=1S/C7H12O5/c1-7(2,12-11)5(3-4-8)6(9)10/h4-5,11H,3H2,1-2H3,(H,9,10)	J41	5.79e-06	0.000649096	0.00157754	0.000166557	1.72583e-05
694	C7236CO	140.137	C5CO14O2 + CH3CO3+ C5CO14O2 + CH3CO3+ C5CO14O2 + CH3CO3	CC(=O)C=CC(=O)C(=O)C	InChI=1S/C7H8O3/c1-5(8)3-4-7(10)6(2)9/h3-4H,1-2H3	J35+J23+J24	0.0002716	0.0304481	0.0289434	0.0076254	0.000316641
695	C726CO3OH	142.153	CH3CO3 + C5DICARB + HO2+ CH3CO3 + C5DICARB + HO2	CC(=O)C=CC(O)C(=O)C	InChI=1S/C7H10O3/c1-5(8)3-4-7(10)6(2)9/h3-4,7,10H,1-2H3	J23+J24	3.6e-06	0.000403583	0.000622439	0.000232715	6.80948e-06
696	C726CO5OOH	158.152	C726CO5O + OH+ C726CO5O + OH+ C726CO5O + OH	OOC(C=CC(=O)C)C(=O)C	InChI=1S/C7H10O4/c1-5(8)3-4-7(11-10)6(2)9/h3-4,7,10H,1-2H3	J41+J23+J24	9.39e-06	0.00105268	0.00118069	0.000233113	1.29167e-05
697	C727CO	142.153	CH3CO3 + CO2C4CO3	CC(=O)CCC(=O)C(=O)C	InChI=1S/C7H10O3/c1-5(8)3-4-7(10)6(2)9/h3-4H2,1-2H3	J35	0.000268	0.0300445	0.0288969	0.00762636	0.000316133
698	C727CO3H	188.178	C727O2 + OH+ C727O2 + OH	OOC(=O)C(CCC(=O)C)C(=O)C	InChI=1S/C8H12O5/c1-5(9)3-4-7(6(2)10)8(11)13-12/h7,12H,3-4H2,1-2H3	J22.*2+J41	1.375e-05	0.00154146	0.000661369	0.00026212	7.23538e-06
699	C727OOH	160.168	C727O + OH	OOC(CCC(=O)C)C(=O)C	InChI=1S/C7H12O4/c1-5(8)3-4-7(11-10)6(2)9/h7,10H,3-4H2,1-2H3	J41	5.79e-06	0.000649096	0.00113425	0.000262474	1.24087e-05
700	C728OOH	178.183	C728O + OH	O=CCC(CO)C(C)(CO)OO	InChI=1S/C7H14O5/c1-7(5-10,12-11)6(4-9)2-3-8/h3,6,9-11H,2,4-5H2,1H3	J41	5.79e-06	0.000649096	0.00157754	0.000166557	1.72583e-05
701	C729CHO	140.18	C729O2 + CO + HO2	O=CCC(CC=O)C(=C)C	InChI=1S/C8H12O2/c1-7(2)8(3-5-9)4-6-10/h5-6,8H,1,3-4H2,2H3	J15.*2	3.98e-05	0.00446184	0.1255	0.0120208	0.00137297
702	C729CO2H	156.179	C729O2 + HO2	O=CCC(CC(=O)O)C(=C)C	InChI=1S/C8H12O3/c1-6(2)7(3-4-9)5-8(10)11/h4,7H,1,3,5H2,2H3,(H,10,11)	J15	1.99e-05	0.00223092	0.000326281	0.000277531	3.56951e-06
703	C729CO3H	172.179	C729O2 + OH+ C729O2 + OH	O=CCC(CC(=O)OO)C(=C)C	InChI=1S/C8H12O4/c1-6(2)7(3-4-9)5-8(10)12-11/h4,7,11H,1,3,5H2,2H3	J41+J15	2.569e-05	0.00288002	0.00217244	0.000551971	2.37665e-05
704	C729NO3	173.167	C729O + NO2	O=CCC(CO[N+](=O)[O-])C(=C)C	InChI=1S/C7H11NO4/c1-6(2)7(3-4-9)5-12-8(10)11/h4,7H,1,3,5H2,2H3	J53	1.79e-06	0.000200671	0.047758	0.00133492	0.000522473
705	C729OOH	144.168	C729O + OH+ C729O + OH	OOCC(CC=O)C(=C)C	InChI=1S/C7H12O3/c1-6(2)7(3-4-8)5-10-9/h4,7,9H,1,3,5H2,2H3	J41+J15	2.569e-05	0.00288002	0.000884532	0.000277865	9.67678e-06
706	C72NO3	191.182	C72O + NO2+ C72O + NO2	CCC(=O)CC(ON(=O)=O)C(C)O	InChI=1S/C7H13NO5/c1-3-6(10)4-7(5(2)9)13-8(11)12/h5,7,9H,3-4H2,1-2H3	J54+J22	6.97e-06	0.000781382	0.00465	0.000743034	5.0871e-05
707	C72OH	146.184	C72O + HO2	CCC(=O)CC(O)C(C)O	InChI=1S/C7H14O3/c1-3-6(9)4-7(10)5(2)8/h5,7-8,10H,3-4H2,1-2H3	J22	3.98e-06	0.000446184	0.000288	0.000185347	3.15072e-06
708	C72OOH	162.184	C72O + OH+ C72O + OH	OOC(CC(=O)CC)C(C)O	InChI=1S/C7H14O4/c1-3-6(9)4-7(11-10)5(2)8/h5,7-8,10H,3-4H2,1-2H3	J41+J22	9.77e-06	0.00109528	0.00082554	0.000185846	9.03141e-06
709	C730OOH	178.183	C730O + OH	OCCC(C=O)C(C)(CO)OO	InChI=1S/C7H14O5/c1-7(5-10,12-11)6(4-9)2-3-8/h4,6,8,10-11H,2-3,5H2,1H3	J41	5.79e-06	0.000649096	0.00186554	0.000249188	2.0409e-05
710	C731CO3H	188.178	C731CO2 + OH	O=CCC(CCC(=O)OO)C(=O)C	InChI=1S/C8H12O5/c1-6(10)7(4-5-9)2-3-8(11)13-12/h5,7,12H,2-4H2,1H3	J41	5.79e-06	0.000649096	0.002414	0.000594623	2.64092e-05
711	C731NO3	189.166	C731O + NO2	O=CCC(CCO[N+](=O)[O-])C(=O)C	InChI=1S/C7H11NO5/c1-6(10)7(2-4-9)3-5-13-8(11)12/h4,7H,2-3,5H2,1H3	J53	1.79e-06	0.000200671	0.00569	0.000761351	6.22486e-05
712	C731OOH	160.168	C731O + OH	OOCCC(CC=O)C(=O)C	InChI=1S/C7H12O4/c1-6(9)7(2-4-8)3-5-11-10/h4,7,10H,2-3,5H2,1H3	J41	5.79e-06	0.000649096	0.00188625	0.000249188	2.06356e-05
713	C732CO	158.152	C734O2 + HO2	O=CC(CCC(=O)O)C(=O)C	InChI=1S/C7H10O4/c1-5(9)6(4-8)2-3-7(10)11/h4,6H,2-3H2,1H3,(H,10,11)	J15	1.99e-05	0.00223092	0.001328	0.000248816	1.45283e-05
714	C732CO3H	204.177	C732O2 + OH	OOC(=O)CC(CCC(=O)O)C(=O)C	InChI=1S/C8H12O6/c1-5(9)6(2-3-7(10)11)4-8(12)14-13/h6,13H,2-4H2,1H3,(H,10,11)	J41	5.79e-06	0.000649096	0.000373369	0.000185347	4.08466e-06
715	C732NO3	205.165	C732O + NO2	OC(=O)CCC(CO[N+](=O)[O-])C(=O)C	InChI=1S/C7H11NO6/c1-5(9)6(2-3-7(10)11)4-14-8(12)13/h6H,2-4H2,1H3,(H,10,11)	J53	1.79e-06	0.000200671	0.00465	0.000743034	5.0871e-05
716	C732OOH	176.167	C732O + OH	OOCC(CCC(=O)O)C(=O)C	InChI=1S/C7H12O5/c1-5(8)6(4-12-11)2-3-7(9)10/h6,11H,2-4H2,1H3,(H,9,10)	J41	5.79e-06	0.000649096	0.00082554	0.000185846	9.03141e-06
717	C733CO	158.152	C519CO3 + CO + HO2	OCCC(C(=O)C)C(=O)C=O	InChI=1S/C7H10O4/c1-5(10)6(2-3-8)7(11)4-9/h4,6,8H,2-3H2,1H3	J34	0.000125	0.0140133	0.0144967	0.00049615	0.000158594
718	C733OOH	176.167	C733O + OH	OCCC(C(=O)C)C(OO)C=O	InChI=1S/C7H12O5/c1-5(10)6(2-3-8)7(4-9)12-11/h4,6-8,11H,2-3H2,1H3	J41	5.79e-06	0.000649096	0.00186554	0.000249188	2.0409e-05
719	C734CO	174.151	C517CO3 + HO2	OCC(CC(=O)C(=O)O)C(=O)C	InChI=1S/C7H10O5/c1-4(9)5(3-8)2-6(10)7(11)12/h5,8H,2-3H2,1H3,(H,11,12)	J22	3.98e-06	0.000446184	0.0286089	0.00762411	0.000312982
720	C734OOH	192.167	C734O + OH	OCC(CC(OO)C(=O)O)C(=O)C	InChI=1S/C7H12O6/c1-4(9)5(3-8)2-6(13-12)7(10)11/h5-6,8,12H,2-3H2,1H3,(H,10,11)	J41	5.79e-06	0.000649096	0.00082554	0.000185846	9.03141e-06
721	C735OH	158.152	CO13C4CHO + CH3CO3 + HO2+ CO13C4CHO + CH3CO3 + HO2	O=CCC(O)(CC=O)C(=O)C	InChI=1S/C7H10O4/c1-6(10)7(11,2-4-8)3-5-9/h4-5,11H,2-3H2,1H3	J22+J15.*2	4.378e-05	0.00490802	0.002368	0.000299108	2.59059e-05
722	C735OOH	174.151	C735O + OH+ CO13C4CHO + CH3CO3 + OH+ CO13C4CHO + CH3CO3 + OH	O=CCC(OO)(CC=O)C(=O)C	InChI=1S/C7H10O5/c1-6(10)7(12-11,2-4-8)3-5-9/h4-5,11H,2-3H2,1H3	J41+J22+J15.*2	4.957e-05	0.00555712	0.00292625	0.000299418	3.20132e-05
723	C736CO	140.137	C522CO3 + CO + HO2	O=CCCC(=C)C(=O)C=O	InChI=1S/C7H8O3/c1-6(3-2-4-8)7(10)5-9/h4-5H,1-3H2	J34	0.000125	0.0140133	0.125826	0.012024	0.00137654
724	C736OOH	158.152	C736O + OH	OOCC(=O)C(=C)CCC=O	InChI=1S/C7H10O4/c1-6(3-2-4-8)7(9)5-11-10/h4,10H,1-3,5H2	J41	5.79e-06	0.000649096	0.00193269	0.000218046	2.11436e-05
725	C73OOH	174.151	C73O + OH+ C73O + OH+ CO23C4CO3 + CH3CHO + OH	CC(OO)C(=O)CC(=O)C(=O)C	InChI=1S/C7H10O5/c1-4(8)6(9)3-7(10)5(2)12-11/h5,11H,3H2,1-2H3	J41+J35+J22	0.00027777	0.0311398	0.0294552	0.00762637	0.00032224
726	C74OOH	174.151	C74O + OH+ CH3CHO + OH + CO2C3CO3 + CO	OOC(C)C(=O)C(=O)CC(=O)C	InChI=1S/C7H10O5/c1-4(8)3-6(9)7(10)5(2)12-11/h5,11H,3H2,1-2H3	J41+J35	0.00027379	0.0306936	0.0294552	0.00762637	0.00032224
727	C75OOH	146.184	C75O + OH+ C75O + OH	OOC(CC(=O)C)C(C)C	InChI=1S/C7H14O3/c1-5(2)7(10-9)4-6(3)8/h5,7,9H,4H2,1-3H3	J41+J22	9.77e-06	0.00109528	0.000846251	0.000185846	9.25799e-06
728	C76OOH	162.184	C76O + OH+ C76O + OH	OOCC(=O)CC(O)C(C)C	InChI=1S/C7H14O4/c1-5(2)7(9)3-6(8)4-11-10/h5,7,9-10H,3-4H2,1-2H3	J41+J22	9.77e-06	0.00109528	0.00082554	0.000185846	9.03141e-06
729	C77CO	144.168	IPRHOCO3 + CH3COCH2O2	CC(=O)CC(=O)C(C)(C)O	InChI=1S/C7H12O3/c1-5(8)4-6(9)7(2,3)10/h10H,4H2,1-3H3	J22.*2	7.96e-06	0.000892368	0.000576	0.00026212	6.30144e-06
730	C77NO3	191.182	C77O + NO2+ C77O + NO2	CC(=O)CC(ON(=O)=O)C(C)(C)O	InChI=1S/C7H13NO5/c1-5(9)4-6(7(2,3)10)13-8(11)12/h6,10H,4H2,1-3H3	J54+J22	6.97e-06	0.000781382	0.00465	0.000743034	5.0871e-05
731	C77OH	146.184	C77O + HO2	CC(=O)CC(O)C(C)(C)O	InChI=1S/C7H14O3/c1-5(8)4-6(9)7(2,3)10/h6,9-10H,4H2,1-3H3	J22	3.98e-06	0.000446184	0.000288	0.000185347	3.15072e-06
732	C77OOH	162.184	C77O + OH+ C77O + OH	OOC(CC(=O)C)C(C)(C)O	InChI=1S/C7H14O4/c1-5(8)4-6(11-10)7(2,3)9/h6,9-10H,4H2,1-3H3	J41+J22	9.77e-06	0.00109528	0.00082554	0.000185846	9.03141e-06
733	C78CO	144.168	H2M2C3CO3 + CH3CO3	CC(=O)C(=O)CC(C)(C)O	InChI=1S/C7H12O3/c1-5(8)6(9)4-7(2,3)10/h10H,4H2,1-3H3	J35	0.000268	0.0300445	0.0286089	0.00762411	0.000312982
734	C78OH	146.184	H2M2C3CHO + CH3CO3 + HO2	CC(=O)C(O)CC(C)(C)O	InChI=1S/C7H14O3/c1-5(8)6(9)4-7(2,3)10/h6,9-10H,4H2,1-3H3	J22	3.98e-06	0.000446184	0.000288	0.000185347	3.15072e-06
735	C78OOH	162.184	C78O + OH+ H2M2C3CHO + CH3CO3 + OH	OOC(CC(C)(C)O)C(=O)C	InChI=1S/C7H14O4/c1-5(8)6(11-10)4-7(2,3)9/h6,9-10H,4H2,1-3H3	J41+J22	9.77e-06	0.00109528	0.00082554	0.000185846	9.03141e-06
736	C79OOH	176.167	C79O + OH+ HCHO + CO235C6 + OH	OOCC(C)(O)C(=O)CC(=O)C	InChI=1S/C7H12O5/c1-5(8)3-6(9)7(2,10)4-12-11/h10-11H,3-4H2,1-2H3	J41+J22.*2	1.375e-05	0.00154146	0.00111354	0.000262474	1.21821e-05
737	C7ADCCO2H	142.153	BIACET + CH3CO3 + HO2+ BIACET + CH3CO3 + HO2	CC(=O)C(=C(C)C(=O)O)C	InChI=1S/C7H10O3/c1-4(6(3)8)5(2)7(9)10/h1-3H3,(H,9,10)	J15+J22	2.388e-05	0.0026771	0.000334439	0.000140722	3.65876e-06
738	C7ADCCO3H	158.152	C7ADCCO2 + OH	OOC(=O)C(=C(C)C(=O)C)C	InChI=1S/C7H10O4/c1-4(6(3)8)5(2)7(9)11-10/h10H,1-3H3	J20.*2	0.001128	0.126456	0.000419808	0.000140722	4.5927e-06
739	C7ADCOH	160.168	C7ADCO + HO2+ C7ADCO + HO2	O=CC(C)(O)C(C)(O)C(=O)C	InChI=1S/C7H12O4/c1-5(9)7(3,11)6(2,10)4-8/h4,10-11H,1-3H3	J15+J22	2.388e-05	0.0026771	0.001328	0.000248816	1.45283e-05
740	C7ADCOOH	176.167	C7ADCO + OH+ C7ADCO + OH+ C7ADCO + OH	O=CC(C)(O)C(C)(OO)C(=O)C	InChI=1S/C7H12O5/c1-5(9)7(3,12-11)6(2,10)4-8/h4,10-11H,1-3H3	J41+J15+J22	2.967e-05	0.0033262	0.00186554	0.000249188	2.0409e-05
741	C7ADICARB	126.153	C7ADCCO3 + HO2+ TMB2FUONE	O=CC(=C(C)C(=O)C)C	InChI=1S/C7H10O2/c1-5(4-8)6(2)7(3)9/h4H,1-3H3	J4.*0.2.*0.6+J4.*0.2.*0.4	0.001784	0.199998	0.00137444	0.00021762	1.50364e-05
742	C7BDCOH	160.168	C5CO243OH + CH3CO3 + HO2	CC(=O)C(O)C(C)(O)C(=O)C	InChI=1S/C7H12O4/c1-4(8)6(10)7(3,11)5(2)9/h6,10-11H,1-3H3	J22.*2	7.96e-06	0.000892368	0.000576	0.00026212	6.30144e-06
743	C7BDCOOH	176.167	C5CO243OH + CH3CO3 + OH+ C7BDCO + OH	OOC(C)(C(=O)C)C(O)C(=O)C	InChI=1S/C7H12O5/c1-4(8)6(10)7(3,12-11)5(2)9/h6,10-11H,1-3H3	J22.*2+J41	1.375e-05	0.00154146	0.00111354	0.000262474	1.21821e-05
744	C7BDICARB	126.153	CH3CO3 + BIACET + HO2 + CO+ CH3CO3 + CH3CO3 + MGLYOX	CC(=O)C=C(C)C(=O)C	InChI=1S/C7H10O2/c1-5(7(3)9)4-6(2)8/h4H,1-3H3	J4.*0.0057.*0.5+J4.*0.0057.*0.5	5.0844e-05	0.00569994	0.000622439	0.000232715	6.80948e-06
745	C7CDCCO2H	142.153	CO23C5 + HO2 + CO + HO2+ CO23C5 + HO2 + CO + HO2	CC(=CC(=O)O)C(=O)CC	InChI=1S/C7H10O3/c1-3-6(8)5(2)4-7(9)10/h4H,3H2,1-2H3,(H,9,10)	J15+J22	2.388e-05	0.0026771	0.000334439	0.000140722	3.65876e-06
746	C7CO2DBAL	140.137	C6DCARBBO2 + HO2 + CO	CCC(=O)C=CC(=O)C=O	InChI=1S/C7H8O3/c1-2-6(9)3-4-7(10)5-8/h3-5H,2H2,1H3	J34	0.000125	0.0140133	0.125834	0.0120216	0.00137663
747	C7CO2DCO3H	172.135	C2H5CO3 + C33CO + OH+ C2H5CO3 + C33CO + OH	O=CC(=O)C=C(CC)C(=O)OO	InChI=1S/C7H8O5/c1-2-5(7(10)12-11)3-6(9)4-8/h3-4,11H,2H2,1H3	J41+J34	0.00013079	0.0146624	0.00145981	0.00021762	1.59703e-05
748	C7CO2M5OH	156.179	C4MCO2OH + HO2 + CO + CH3CO3+ CH3CO3 + C4DBDIKET + HO2	CC(=O)C=CC(C)(O)C(=O)C	InChI=1S/C8H12O3/c1-6(9)4-5-8(3,11)7(2)10/h4-5,11H,1-3H3	J24+J22	5.78e-06	0.000647975	0.000622439	0.000232715	6.80948e-06
749	C7CO2M5OOH	172.179	C4MCO2OOH + HO2 + CO + CH3CO3+ C7CO2M5O + OH+ CH3CO3 + C4DBDIKET + OH	OOC(C)(C=CC(=O)C)C(=O)C	InChI=1S/C8H12O4/c1-6(9)4-5-8(3,12-11)7(2)10/h4-5,11H,1-3H3	J24+J41+J22	1.157e-05	0.00129707	0.00118069	0.000233113	1.29167e-05
750	C7CO2OCO3H	202.161	C5CO3OH + CH3CO3 + OH	OOC(=O)C(=CC(=O)C(O)C(=O)C)C	InChI=1S/C8H10O6/c1-4(8(12)14-13)3-6(10)7(11)5(2)9/h3,7,11,13H,1-2H3	J41	5.79e-06	0.000649096	0.000707808	0.000232715	7.74342e-06
751	C7CO3OHOOH	190.151	C7CO3OHO + OH+ C7CO3OHO + OH	CCC(=O)C(OO)C(O)C(=O)C=O	InChI=1S/C7H10O6/c1-2-4(9)7(13-12)6(11)5(10)3-8/h3,6-7,11-12H,2H2,1H3	J41+J34	0.00013079	0.0146624	0.0150343	0.000496337	0.000164475
752	C7CO4DB	154.12	C5CO2DBCO3 + HO2 + CO	O=CC(=O)C=C(C)C(=O)C=O	InChI=1S/C7H6O4/c1-5(7(11)4-9)2-6(10)3-8/h2-4H,1H3	J34.*2	0.00025	0.0280266	0.126874	0.0120228	0.00138801
753	C7CO4EDB	182.173	C5DBECO3 + HO2 + CO+ C5DBECO3 + HO2 + CO	O=CC(=O)C=C(CC)C(=O)C(=O)C	InChI=1S/C9H10O4/c1-3-7(4-8(12)5-10)9(13)6(2)11/h4-5H,3H2,1-2H3	J34+J35	0.000393	0.0440578	0.0307814	0.00764406	0.000336748
754	C7DCCO2H	142.153	PGLYOX + CO + HO2 + HO2+ PGLYOX + CO + HO2 + HO2	CCCC(=O)C=CC(=O)O	InChI=1S/C7H10O3/c1-2-3-6(8)4-5-7(9)10/h4-5H,2-3H2,1H3,(H,9,10)	J15+J22	2.388e-05	0.0026771	0.000334439	0.000140722	3.65876e-06
755	C7DCCO3H	158.152	C7DCCO2 + OH	CCCC(=O)C=CC(=O)OO	InChI=1S/C7H10O4/c1-2-3-6(8)4-5-7(9)11-10/h4-5,10H,2-3H2,1H3	J20.*2	0.001128	0.126456	0.000419808	0.000140722	4.5927e-06
756	C7DCOH	160.168	C7DCO + HO2+ C7DCO + HO2	CCCC(=O)C(O)C(O)C=O	InChI=1S/C7H12O4/c1-2-3-5(9)7(11)6(10)4-8/h4,6-7,10-11H,2-3H2,1H3	J15+J22	2.388e-05	0.0026771	0.001328	0.000248816	1.45283e-05
757	C7DCOOH	176.167	C7DCO + OH+ C7DCO + OH+ C7DCO + OH	CCCC(=O)C(OO)C(O)C=O	InChI=1S/C7H12O5/c1-2-3-5(9)7(12-11)6(10)4-8/h4,6-7,10-11H,2-3H2,1H3	J41+J15+J22	2.967e-05	0.0033262	0.00186554	0.000249188	2.0409e-05
758	C7DDCCO2H	142.153	CH3COCO2H + CH3CO3 + HO2 + CO+ EGLYOX + CH3CO3 + HO2+ EGLYOX + CH3CO3 + HO2	CCC(=O)C=C(C)C(=O)O	InChI=1S/C7H10O3/c1-3-6(8)4-5(2)7(9)10/h4H,3H2,1-2H3,(H,9,10)	J22+J15+J22	2.786e-05	0.00312329	0.000334439	0.000140722	3.65876e-06
759	C7DDCCO3H	158.152	C7DDCCO2 + OH	CCC(=O)C=C(C)C(=O)OO	InChI=1S/C7H10O4/c1-3-6(8)4-5(2)7(9)11-10/h4,10H,3H2,1-2H3	J20.*2	0.001128	0.126456	0.000419808	0.000140722	4.5927e-06
760	C7DDCOH	160.168	C7DDCO + HO2+ C7DDCO + HO2	CC(O)(C=O)C(O)C(=O)CC	InChI=1S/C7H12O4/c1-3-5(9)6(10)7(2,11)4-8/h4,6,10-11H,3H2,1-2H3	J15+J22	2.388e-05	0.0026771	0.001328	0.000248816	1.45283e-05
761	C7DDCOOH	176.167	C7DDCO + OH+ C7DDCO + OH+ C7DDCO + OH	CC(OO)(C=O)C(O)C(=O)CC	InChI=1S/C7H12O5/c1-3-5(9)6(10)7(2,4-8)12-11/h4,6,10-11H,3H2,1-2H3	J41+J15+J22	2.967e-05	0.0033262	0.00186554	0.000249188	2.0409e-05
762	C7DDICARB	126.153	C7DDCCO3 + HO2+ MEBFUONE	CCC(=O)C=C(C)C=O	InChI=1S/C7H10O2/c1-3-7(9)4-6(2)5-8/h4-5H,3H2,1-2H3	J4.*0.2.*0.6+J4.*0.2.*0.4	0.001784	0.199998	0.00137444	0.00021762	1.50364e-05
763	C7DICARB	126.153	C7DCCO3 + HO2+ PBFUONE	CCCC(=O)C=CC=O	InChI=1S/C7H10O2/c1-2-4-7(9)5-3-6-8/h3,5-6H,2,4H2,1H3	J4.*0.2.*0.6+J4.*0.2.*0.4	0.001784	0.199998	0.00137444	0.00021762	1.50364e-05
764	C7ECO4DB	182.173	C5EDBCO3 + HO2 + CO+ C5EDBCO3 + HO2 + CO	O=CC(=O)C(=CC(=O)C(=O)C)CC	InChI=1S/C9H10O4/c1-3-7(9(13)5-10)4-8(12)6(2)11/h4-5H,3H2,1-2H3	J34+J35	0.000393	0.0440578	0.0307814	0.00764406	0.000336748
765	C7EDCCO	158.152	EGLYOX + CO + HO2 + CH3CO3+ MGLYOX + CO + HO2 + C2H5CO3	CCC(=O)C(O)C(=O)C(=O)C	InChI=1S/C7H10O4/c1-3-5(9)7(11)6(10)4(2)8/h7,11H,3H2,1-2H3	J22+J22.*2	1.194e-05	0.00133855	0.0288969	0.00762636	0.000316133
766	C7EDCOH	160.168	C7EDCO + HO2	CCC(=O)C(O)C(O)C(=O)C	InChI=1S/C7H12O4/c1-3-5(9)7(11)6(10)4(2)8/h6-7,10-11H,3H2,1-2H3	J22.*2	7.96e-06	0.000892368	0.000576	0.00026212	6.30144e-06
767	C7EDCOOH	176.167	C7EDCO + OH+ C7EDCO + OH	OOC(C(=O)C)C(O)C(=O)CC	InChI=1S/C7H12O5/c1-3-5(9)6(10)7(12-11)4(2)8/h6-7,10-11H,3H2,1-2H3	J41+J22.*2	1.375e-05	0.00154146	0.00111354	0.000262474	1.21821e-05
768	C7EDICARB	126.153	C2H5CO3 + MGLYOX + HO2 + CO+ EGLYOX + CH3CO3 + HO2 + CO	CCC(=O)C=CC(=O)C	InChI=1S/C7H10O2/c1-3-7(9)5-4-6(2)8/h4-5H,3H2,1-2H3	J4.*0.0057.*0.5+J4.*0.0057.*0.5	5.0844e-05	0.00569994	0.000622439	0.000232715	6.80948e-06
769	C7M15CO2OH	156.179	IC7DICARB + CO + HO2 + HO2+ IC7DICARB + CO + HO2 + HO2+ IC7DICARB + CO + HO2 + HO2	O=CC(O)C=CC(=O)C(C)C	InChI=1S/C8H12O3/c1-6(2)8(11)4-3-7(10)5-9/h3-7,10H,1-2H3	J17+J23+J24	5.86e-05	0.00656944	0.00217244	0.000551971	2.37665e-05
770	C7M2CO5OH	156.179	C5MDICARB + HO2 + CH3CO3+ C5MDICARB + HO2 + CH3CO3	CC(=O)C=C(C)C(O)C(=O)C	InChI=1S/C8H12O3/c1-5(4-6(2)9)8(11)7(3)10/h4,8,11H,1-3H3	J23+J22	5.78e-06	0.000647975	0.000622439	0.000232715	6.80948e-06
771	C7M2CO5OOH	172.179	C5MDICARB + CH3CO3 + OH+ C7M2CO5O + OH+ CO24C53OOH + CH3CO3 + HO2 + CO	OOC(C(=O)C)C(=CC(=O)C)C	InChI=1S/C8H12O4/c1-5(4-6(2)9)8(12-11)7(3)10/h4,8,11H,1-3H3	J22+J41+J23	1.157e-05	0.00129707	0.00118069	0.000233113	1.29167e-05
772	C7M3CO	154.163	C5CO234 + CH3CO3 + HO2 + CO+ CH3CO3 + C4MCODBCO3	CC(=O)C=C(C)C(=O)C(=O)C	InChI=1S/C8H10O3/c1-5(4-6(2)9)8(11)7(3)10/h4H,1-3H3	J23+J35	0.0002698	0.0302463	0.0289434	0.0076254	0.000316641
773	C7M6CO2OH	156.179	C3MDIALOH + C2H5CO3 + HO2 + CO+ C7EDICARB + HO2 + CO + HO2	CCC(=O)C=CC(C)(O)C=O	InChI=1S/C8H12O3/c1-3-7(10)4-5-8(2,11)6-9/h4-6,11H,3H2,1-2H3	J23.*2+J17	5.86e-05	0.00656944	0.00217244	0.000551971	2.37665e-05
774	C7M6CO2OOH	172.179	C3MDIALOOH + C2H5CO3 + HO2 + CO+ C7EDICARB + HO2 + CO + OH+ C7M6CO2O + OH	CCC(=O)C=CC(C)(OO)C=O	InChI=1S/C8H12O4/c1-3-7(10)4-5-8(2,6-9)12-11/h4-6,11H,3H2,1-2H3	J23.*2+J17+J41	6.439e-05	0.00721854	0.00273069	0.000552139	2.98737e-05
775	C7MCO2DBAL	154.163	IC7DCCO3 + HO2 + CO	O=CC(=O)C=CC(=O)C(C)C	InChI=1S/C8H10O3/c1-6(2)8(11)4-3-7(10)5-9/h3-6H,1-2H3	J34	0.000125	0.0140133	0.00246044	0.000582259	2.69172e-05
776	C7MCO2OOH	172.179	C7M15CO2O + OH+ C7M15CO2O + OH+ IC7DICARB + CO + HO2 + OH+ IC7DICARB + CO + HO2 + OH	OOC(C=O)C=CC(=O)C(C)C	InChI=1S/C8H12O4/c1-6(2)8(10)4-3-7(5-9)12-11/h3-7,11H,1-2H3	J41+J24+J17+J23	6.439e-05	0.00721854	0.00273069	0.000552139	2.98737e-05
777	C7MJPCO3H	216.188	C7EDCCO + HO2 + CO + OH	OOC(=O)C=C(C)C(=O)C(O)C(=O)CC	InChI=1S/C9H12O6/c1-3-6(10)9(13)8(12)5(2)4-7(11)15-14/h4,9,13-14H,3H2,1-2H3	J41	5.79e-06	0.000649096	0.000707808	0.000232715	7.74342e-06
778	C7MO3OHOOH	204.177	C7MCO3OHO + OH+ C7MCO3OHO + OH	O=CC(=O)C(O)C(OO)C(=O)C(C)C	InChI=1S/C8H12O6/c1-4(2)6(11)8(14-13)7(12)5(10)3-9/h3-4,7-8,12-13H,1-2H3	J41+J34	0.00013079	0.0146624	0.00295154	0.000594779	3.22898e-05
779	C7MOCOCO3H	216.188	DMKCOOH + CH3CO3 + OH	OOC(=O)C(=C(C)C(=O)C(O)C(=O)C)C	InChI=1S/C9H12O6/c1-4(5(2)9(13)15-14)7(11)8(12)6(3)10/h8,12,14H,1-3H3	J41	5.79e-06	0.000649096	0.000707808	0.000232715	7.74342e-06
780	C7ODLBCO3H	172.179	EGLYOX + C2H5CO3 + OH	CCC(=O)C=C(CC)C(=O)OO	InChI=1S/C8H12O4/c1-3-6(8(10)12-11)5-7(9)4-2/h5,11H,3-4H2,1-2H3	J41	5.79e-06	0.000649096	0.000419808	0.000140722	4.5927e-06
781	C7OHO2CO3H	202.161	C6134CO2OH + HO2 + CO + OH+ C6134CO2OH + HO2 + CO + OH+ C6134CO2OH + HO2 + CO + OH	CCC(=CC(=O)OO)C(=O)C(O)C=O	InChI=1S/C8H10O6/c1-2-5(3-7(11)14-13)8(12)6(10)4-9/h3-4,6,10,13H,2H2,1H3	J41+J17+J22	6.477e-05	0.00726114	0.00246044	0.000582259	2.69172e-05
782	C810NO3	203.192	C810O + NO2+ C810O + NO2	O=CCC(CC=O)C(C)(C)ON(=O)=O	InChI=1S/C8H13NO5/c1-8(2,14-9(12)13)7(3-5-10)4-6-11/h5-7H,3-4H2,1-2H3	J55+J15	2.823e-05	0.00316477	0.0168468	0.00143767	0.000184304
783	C810OH	158.195	C810O + HO2	O=CCC(CC=O)C(C)(C)O	InChI=1S/C8H14O3/c1-8(2,11)7(3-5-9)4-6-10/h5-7,11H,3-4H2,1-2H3	J15	1.99e-05	0.00223092	0.003676	0.000754811	4.02154e-05
784	C810OOH	174.194	C810O + OH+ C810O + OH	O=CCC(CC=O)C(C)(C)OO	InChI=1S/C8H14O4/c1-8(2,12-11)7(3-5-9)4-6-10/h5-7,11H,3-4H2,1-2H3	J41+J15	2.569e-05	0.00288002	0.00423425	0.000754934	4.63227e-05
785	C811CO3H	202.204	C811O2 + OH	OOC(=O)CC1CC(C(=O)O)C1(C)C	InChI=1S/C9H14O5/c1-9(2)5(4-7(10)14-13)3-6(9)8(11)12/h5-6,13H,3-4H2,1-2H3,(H,11,12)	J41	5.79e-06	0.000649096	8.5369e-05	NaN	9.33937e-07
786	C811NO3	203.192	C811O + NO2	O=N(=O)OCC1CC(C(=O)O)C1(C)C	InChI=1S/C8H13NO5/c1-8(2)5(4-14-9(12)13)3-6(8)7(10)11/h5-6H,3-4H2,1-2H3,(H,10,11)	J53	1.79e-06	0.000200671	6.8088e-05	3.23144e-05	7.44882e-07
787	C811OOH	174.194	C811O + OH	OOCC1CC(C(=O)O)C1(C)C	InChI=1S/C8H14O4/c1-8(2)5(4-12-11)3-6(8)7(9)10/h5-6,11H,3-4H2,1-2H3,(H,9,10)	J41	5.79e-06	0.000649096	0.00053754	1.36143e-05	5.88069e-06
788	C812OOH	190.194	C812O + OH	OCC1CC(OO)(C(=O)O)C1(C)C	InChI=1S/C8H14O5/c1-7(2)5(4-9)3-8(7,13-12)6(10)11/h5,9,12H,3-4H2,1-2H3,(H,10,11)	J41	5.79e-06	0.000649096	0.00053754	1.36143e-05	5.88069e-06
789	C813NO3	235.191	C813O + NO2+ C813O + NO2	OCC(CC(=O)C(=O)O)C(C)(C)ON(=O)=O	InChI=1S/C8H13NO7/c1-8(2,16-9(14)15)5(4-10)3-6(11)7(12)13/h5,10H,3-4H2,1-2H3,(H,12,13)	J55+J34	0.00013333	0.0149472	0.0332589	0.00766023	0.000363853
790	C813OH	190.194	C813O + HO2	OCC(CC(=O)C(=O)O)C(C)(C)O	InChI=1S/C8H14O5/c1-8(2,13)5(4-9)3-6(10)7(11)12/h5,9,13H,3-4H2,1-2H3,(H,11,12)	J34	0.000125	0.0140133	0.0288969	0.00762636	0.000316133
791	C813OOH	206.193	C813O + OH+ C813O + OH	OCC(CC(=O)C(=O)O)C(C)(C)OO	InChI=1S/C8H14O6/c1-8(2,14-13)5(4-9)3-6(10)7(11)12/h5,9,13H,3-4H2,1-2H3,(H,11,12)	J41+J34	0.00013079	0.0146624	0.0294345	0.00762637	0.000322013
792	C815CO2OH	156.179	C7DICARB + CO + HO2 + HO2+ C7DICARB + CO + HO2 + HO2+ C7DICARB + CO + HO2 + HO2	CCCC(=O)C=CC(O)C=O	InChI=1S/C8H12O3/c1-2-3-7(10)4-5-8(11)6-9/h4-6,8,11H,2-3H2,1H3	J17+J23+J24	5.86e-05	0.00656944	0.00217244	0.000551971	2.37665e-05
793	C815CO2OOH	172.179	C7DICARB + CO + HO2 + OH+ C7DICARB + CO + HO2 + OH+ C815CO2O + OH+ C815CO2O + OH	CCCC(=O)C=CC(OO)C=O	InChI=1S/C8H12O4/c1-2-3-7(10)4-5-8(6-9)12-11/h4-6,8,11H,2-3H2,1H3	J17+J23+J41+J24	6.439e-05	0.00721854	0.00273069	0.000552139	2.98737e-05
794	C816CO	140.18	MACO3 + MEKAO2+ MACO3 + MEKAO2	CC(=O)CCC(=O)C(=C)C	InChI=1S/C8H12O2/c1-6(2)8(10)5-4-7(3)9/h1,4-5H2,2-3H3	J18+J19	2.2e-06	0.000246634	0.000622439	0.000232715	6.80948e-06
795	C816CO3H	186.205	C816O2 + OH	OOC(=O)C(CCC(=O)C)C(=C)C	InChI=1S/C9H14O4/c1-6(2)8(9(11)13-12)5-4-7(3)10/h8,12H,1,4-5H2,2-3H3	J41	5.79e-06	0.000649096	0.000419808	0.000140722	4.5927e-06
796	C816OOH	158.195	C816O + OH+ C816O + OH	OOC(CCC(=O)C)C(=C)C	InChI=1S/C8H14O3/c1-6(2)8(11-10)5-4-7(3)9/h8,10H,1,4-5H2,2-3H3	J22+J41	9.77e-06	0.00109528	0.00089269	0.000141379	9.76603e-06
797	C817CO3H	202.204	C817O2 + OH+ C817O2 + OH	OOC(=O)CC(CCC(=O)C)C(=O)C	InChI=1S/C9H14O5/c1-6(10)3-4-8(7(2)11)5-9(12)14-13/h8,13H,3-5H2,1-2H3	J22.*2+J41	1.375e-05	0.00154146	0.000661369	0.00026212	7.23538e-06
798	C817NO3	203.192	C817O + NO2+ C817O + NO2	CC(=O)CCC(CO[N+](=O)[O-])C(=O)C	InChI=1S/C8H13NO5/c1-6(10)3-4-8(7(2)11)5-14-9(12)13/h8H,3-5H2,1-2H3	J22.*2+J53	9.75e-06	0.00109304	0.004938	0.000765802	5.40217e-05
799	C817OH	158.195	C818O2 + HO2	OCC(CCC(=O)C)C(=O)C	InChI=1S/C8H14O3/c1-6(10)3-4-8(5-9)7(2)11/h8-9H,3-5H2,1-2H3	J22.*2	7.96e-06	0.000892368	0.000576	0.00026212	6.30144e-06
800	C817OOH	174.194	C817O + OH+ C817O + OH	OOCC(CCC(=O)C)C(=O)C	InChI=1S/C8H14O4/c1-6(9)3-4-8(5-12-11)7(2)10/h8,11H,3-5H2,1-2H3	J22.*2+J41	1.375e-05	0.00154146	0.00113425	0.000262474	1.24087e-05
801	C818OH	174.194	C517CHO + CH3CO3 + HO2	OCC(CC(O)C(=O)C)C(=O)C	InChI=1S/C8H14O4/c1-5(10)7(4-9)3-8(12)6(2)11/h7-9,12H,3-4H2,1-2H3	J22.*2	7.96e-06	0.000892368	0.000576	0.00026212	6.30144e-06
802	C818OOH	190.194	C517CHO + CH3CO3 + OH+ C818O + OH	OCC(CC(OO)C(=O)C)C(=O)C	InChI=1S/C8H14O5/c1-5(10)7(4-9)3-8(13-12)6(2)11/h7-9,12H,3-4H2,1-2H3	J22.*2+J41	1.375e-05	0.00154146	0.00111354	0.000262474	1.21821e-05
803	C819OOH	190.194	C819O + OH+ C819O + OH	OCC(C)(OO)C(=O)CCC(=O)C	InChI=1S/C8H14O5/c1-6(10)3-4-7(11)8(2,5-9)13-12/h9,12H,3-5H2,1-2H3	J22.*2+J41	1.375e-05	0.00154146	0.00111354	0.000262474	1.21821e-05
804	C81OOH	176.21	C81O + OH+ C81O + OH	CC(OO)C(=O)CC(O)CCC	InChI=1S/C8H16O4/c1-3-4-7(9)5-8(10)6(2)12-11/h6-7,9,11H,3-5H2,1-2H3	J41+J22	9.77e-06	0.00109528	0.00082554	0.000185846	9.03141e-06
805	C820OOH	204.177	C820O + OH+ C820O + OH+ C820O + OH	OCC(OO)(CC(=O)C(=O)C)C(=O)C	InChI=1S/C8H12O6/c1-5(10)7(12)3-8(4-9,14-13)6(2)11/h9,13H,3-4H2,1-2H3	J22+J35+J41	0.00027777	0.0311398	0.0294345	0.00762637	0.000322013
806	C821OOH	174.151	C821O + OH+ C821O + OH	OOC(CC(=O)C)C(=O)C(=O)C	InChI=1S/C7H10O5/c1-4(8)3-6(12-11)7(10)5(2)9/h6,11H,3H2,1-2H3	J35+J41	0.00027379	0.0306936	0.0294552	0.00762637	0.00032224
807	C822CO3H	186.205	C822CO2 + OH	O=CCC(CCC(=O)OO)C(=C)C	InChI=1S/C9H14O4/c1-7(2)8(5-6-10)3-4-9(11)13-12/h6,8,12H,1,3-5H2,2H3	J41	5.79e-06	0.000649096	0.00217244	0.000551971	2.37665e-05
808	C822NO3	187.193	C822O + NO2	O=CCC(CCO[N+](=O)[O-])C(=C)C	InChI=1S/C8H13NO4/c1-7(2)8(3-5-10)4-6-13-9(11)12/h5,8H,1,3-4,6H2,2H3	J53	1.79e-06	0.000200671	0.047758	0.00133492	0.000522473
809	C822OOH	158.195	C822O + OH	OOCCC(CC=O)C(=C)C	InChI=1S/C8H14O3/c1-7(2)8(3-5-9)4-6-11-10/h5,8,10H,1,3-4,6H2,2H3	J41	5.79e-06	0.000649096	0.000884532	0.000277865	9.67678e-06
810	C8236CO	154.163	C6DCARBBO2 + CH3CO3+ CO23C3CHO + C2H5CO3 + HO2 + CO	CCC(=O)C=CC(=O)C(=O)C	InChI=1S/C8H10O3/c1-3-7(10)4-5-8(11)6(2)9/h4-5H,3H2,1-2H3	J34+J23.*2	0.0001286	0.0144169	0.0289434	0.0076254	0.000316641
811	C823CO	156.179	C825O2 + HO2	O=CC(CCC(=O)O)C(=C)C	InChI=1S/C8H12O3/c1-6(2)7(5-9)3-4-8(10)11/h5,7H,1,3-4H2,2H3,(H,10,11)	J15	1.99e-05	0.00223092	0.000326281	0.000277531	3.56951e-06
812	C823CO3H	202.204	C823O2 + OH	OOC(=O)CC(CCC(=O)O)C(=C)C	InChI=1S/C9H14O5/c1-6(2)7(3-4-8(10)11)5-9(12)14-13/h7,13H,1,3-5H2,2H3,(H,10,11)	J41	5.79e-06	0.000649096	8.5369e-05	NaN	9.33937e-07
813	C823NO3	203.192	C823O + NO2	OC(=O)CCC(CO[N+](=O)[O-])C(=C)C	InChI=1S/C8H13NO5/c1-6(2)7(3-4-8(10)11)5-14-9(12)13/h7H,1,3-5H2,2H3,(H,10,11)	J53	1.79e-06	0.000200671	0.00019272	3.23144e-05	2.10836e-06
814	C823OOH	174.194	C823O + OH	OOCC(CCC(=O)O)C(=C)C	InChI=1S/C8H14O4/c1-6(2)7(5-12-11)3-4-8(9)10/h7,11H,1,3-5H2,2H3,(H,9,10)	J41	5.79e-06	0.000649096	0.00053754	1.36143e-05	5.88069e-06
815	C824CO	156.179	C624CO3 + CO + HO2	OCCC(C(=C)C)C(=O)C=O	InChI=1S/C8H12O3/c1-6(2)7(3-4-9)8(11)5-10/h5,7,9H,1,3-4H2,2H3	J34	0.000125	0.0140133	0.1255	0.0120208	0.00137297
816	C824OOH	174.194	C824O + OH	OCCC(C(=C)C)C(OO)C=O	InChI=1S/C8H14O4/c1-6(2)7(3-4-9)8(5-10)12-11/h5,7-9,11H,1,3-4H2,2H3	J41	5.79e-06	0.000649096	0.000863821	0.000277865	9.4502e-06
817	C825CO	172.179	C622CO3 + HO2	OCC(CC(=O)C(=O)O)C(=C)C	InChI=1S/C8H12O4/c1-5(2)6(4-9)3-7(10)8(11)12/h6,9H,1,3-4H2,2H3,(H,11,12)	J22	3.98e-06	0.000446184	0.0289434	0.0076254	0.000316641
818	C825OOH	190.194	C825O + OH	OCC(CC(OO)C(=O)O)C(=C)C	InChI=1S/C8H14O5/c1-5(2)6(4-9)3-7(13-12)8(10)11/h6-7,9,12H,1,3-4H2,2H3,(H,10,11)	J41	5.79e-06	0.000649096	0.00053754	1.36143e-05	5.88069e-06
819	C826CO3OH	156.179	C6DICARB + CH3CO3 + HO2+ C826CO3O + HO2	CCC(=O)C=CC(O)C(=O)C	InChI=1S/C8H12O3/c1-3-7(10)4-5-8(11)6(2)9/h4-5,8,11H,3H2,1-2H3	J22+J23.*2	7.58e-06	0.000849767	0.000622439	0.000232715	6.80948e-06
820	C826CO3OOH	172.179	C6DICARB + CH3CO3 + OH+ C826CO3O + OH+ C826CO3O + OH	OOC(C=CC(=O)CC)C(=O)C	InChI=1S/C8H12O4/c1-3-7(10)4-5-8(12-11)6(2)9/h4-5,8,11H,3H2,1-2H3	J22+J41+J23.*2	1.337e-05	0.00149886	0.00118069	0.000233113	1.29167e-05
821	C826OH	174.194	C826O + HO2	O=CCC(CC=O)C(C)(O)CO	InChI=1S/C8H14O4/c1-8(12,6-11)7(2-4-9)3-5-10/h4-5,7,11-12H,2-3,6H2,1H3	J15.*2	3.98e-05	0.00446184	0.003676	0.000754811	4.02154e-05
822	C826OOH	190.194	C826O + OH+ C826O + OH	O=CCC(CC=O)C(C)(CO)OO	InChI=1S/C8H14O5/c1-8(6-11,13-12)7(2-4-9)3-5-10/h4-5,7,11-12H,2-3,6H2,1H3	J41+J15.*2	4.559e-05	0.00511093	0.00421354	0.000754934	4.60961e-05
823	C827CHO	170.206	C827O2 + CO + HO2	O=CC(C)(C)C(=O)CCC(=O)C	InChI=1S/C9H14O3/c1-7(11)4-5-8(12)9(2,3)6-10/h6H,4-5H2,1-3H3	J15	1.99e-05	0.00223092	0.002414	0.000594623	2.64092e-05
824	C827CO3H	202.204	C827O2 + OH	OOC(=O)C(C)(C)C(=O)CCC(=O)C	InChI=1S/C9H14O5/c1-6(10)4-5-7(11)9(2,3)8(12)14-13/h13H,4-5H2,1-3H3	J41	5.79e-06	0.000649096	0.000661369	0.00026212	7.23538e-06
825	C827OOH	174.194	C827O2 + OH	OOC(C)(C)C(=O)CCC(=O)C	InChI=1S/C8H14O4/c1-6(9)4-5-7(10)8(2,3)12-11/h11H,4-5H2,1-3H3	J41	5.79e-06	0.000649096	0.00113425	0.000262474	1.24087e-05
826	C828CHO	184.189	C828O2 + CO + HO2	O=CC(C)(C)C(=O)C(=O)CC(=O)C	InChI=1S/C9H12O4/c1-6(11)4-7(12)8(13)9(2,3)5-10/h5H,4H2,1-3H3	J15	1.99e-05	0.00223092	0.0307349	0.00764501	0.00033624
827	C828CO3H	216.188	C828O2 + OH	OOC(=O)C(C)(C)C(=O)C(=O)CC(=O)C	InChI=1S/C9H12O6/c1-5(10)4-6(11)7(12)9(2,3)8(13)15-14/h14H,4H2,1-3H3	J41	5.79e-06	0.000649096	0.0289823	0.00762636	0.000317066
828	C828OOH	188.178	C828O + OH	OOC(C)(C)C(=O)C(=O)CC(=O)C	InChI=1S/C8H12O5/c1-5(9)4-6(10)7(11)8(2,3)13-12/h12H,4H2,1-3H3	J41	5.79e-06	0.000649096	0.0294552	0.00762637	0.00032224
829	C829NO3	219.192	C829O + NO2+ C829O + NO2	OCCC(=O)C(=O)CC(C)(C)O[N+](=O)[O-]	InChI=1S/C8H13NO6/c1-8(2,15-9(13)14)5-7(12)6(11)3-4-10/h10H,3-5H2,1-2H3	J55+J35	0.00027633	0.0309784	0.0288017	0.00762417	0.00031509
830	C829OH	174.194	H2M2C3CO3 + HOC2H4CO3	OCCC(=O)C(=O)CC(C)(C)O	InChI=1S/C8H14O4/c1-8(2,12)5-7(11)6(10)3-4-9/h9,12H,3-5H2,1-2H3	J35	0.000268	0.0300445	0.0286089	0.00762411	0.000312982
831	C829OOH	190.194	C829O + OH+ C829O + OH	OCCC(=O)C(=O)CC(C)(C)OO	InChI=1S/C8H14O5/c1-8(2,13-12)5-7(11)6(10)3-4-9/h9,12H,3-5H2,1-2H3	J41+J35	0.00027379	0.0306936	0.0291465	0.00762412	0.000318863
832	C82NO3	205.208	C82O + NO2	CCC(=O)CC(ON(=O)=O)C(O)CC	InChI=1S/C8H15NO5/c1-3-6(10)5-8(7(11)4-2)14-9(12)13/h7-8,11H,3-5H2,1-2H3	J22	3.98e-06	0.000446184	0.00465	0.000743034	5.0871e-05
833	C82OOH	176.21	C82O + OH+ C82O + OH	CCC(=O)CC(OO)C(O)CC	InChI=1S/C8H16O4/c1-3-6(9)5-8(12-11)7(10)4-2/h7-8,10-11H,3-5H2,1-2H3	J41+J22	9.77e-06	0.00109528	0.00082554	0.000185846	9.03141e-06
834	C830CO3H	186.205	C830O2 + OH	O=CCC1C(CC1(C)C)C(=O)OO	InChI=1S/C9H14O4/c1-9(2)5-6(8(11)13-12)7(9)3-4-10/h4,6-7,12H,3,5H2,1-2H3	J41	5.79e-06	0.000649096	0.00192337	0.000533732	2.10417e-05
835	C830NO3	187.193	C830O + NO2	O=CCC1C(O[N+](=O)[O-])CC1(C)C	InChI=1S/C8H13NO4/c1-8(2)5-7(13-9(11)12)6(8)3-4-10/h4,6-7H,3,5H2,1-2H3	J54	2.99e-06	0.000335198	0.0064853	0.00133492	7.09492e-05
836	C830OOH	158.195	C830O + OH	O=CCC1C(OO)CC1(C)C	InChI=1S/C8H14O3/c1-8(2)5-7(11-10)6(8)3-4-9/h4,6-7,10H,3,5H2,1-2H3	J41	5.79e-06	0.000649096	0.00239625	0.000533906	2.6215e-05
837	C831NO3	203.192	C831O + NO2	O=CCC(O[N+](=O)[O-])C(C)(C)CC=O	InChI=1S/C8H13NO5/c1-8(2,4-6-11)7(3-5-10)14-9(12)13/h5-7H,3-4H2,1-2H3	J54	2.99e-06	0.000335198	0.0168468	0.00143767	0.000184304
838	C831OOH	174.194	C831O + OH	O=CCC(OO)C(C)(C)CC=O	InChI=1S/C8H14O4/c1-8(2,4-6-10)7(12-11)3-5-9/h5-7,11H,3-4H2,1-2H3	J41	5.79e-06	0.000649096	0.00423425	0.000754934	4.63227e-05
839	C83COOHOOH	204.177	C8CO3OHO + OH+ C8CO3OHO + OH	CCCC(=O)C(OO)C(O)C(=O)C=O	InChI=1S/C8H12O6/c1-2-3-5(10)8(14-13)7(12)6(11)4-9/h4,7-8,12-13H,2-3H2,1H3	J41+J34	0.00013079	0.0146624	0.0150343	0.000496337	0.000164475
840	C83OOH	188.178	C83O + OH+ C83O + OH+ C83O + OH	CCC(=O)C(=O)C(OO)C(=O)CC	InChI=1S/C8H12O5/c1-3-5(9)7(11)8(13-12)6(10)4-2/h8,12H,3-4H2,1-2H3	J41+J22+J35	0.00027777	0.0311398	0.0294552	0.00762637	0.00032224
841	C84OH	158.195	C2H5CO3 + CO3C4CHO + HO2	CCC(=O)CC(O)C(=O)CC	InChI=1S/C8H14O3/c1-3-6(9)5-8(11)7(10)4-2/h8,11H,3-5H2,1-2H3	J22.*2	7.96e-06	0.000892368	0.000576	0.00026212	6.30144e-06
842	C84OOH	174.194	C2H5CO3 + CO3C4CHO + OH+ C84O + OH	CCC(=O)CC(OO)C(=O)CC	InChI=1S/C8H14O4/c1-3-6(9)5-8(12-11)7(10)4-2/h8,11H,3-5H2,1-2H3	J22.*2+J41	1.375e-05	0.00154146	0.00113425	0.000262474	1.24087e-05
843	C85CO3H	186.205	C85O2 + OH+ C85O2 + OH	OOC(=O)C1CC(C(=O)C)C1(C)C	InChI=1S/C9H14O4/c1-5(10)6-4-7(8(11)13-12)9(6,2)3/h6-7,12H,4H2,1-3H3	J41+J22	9.77e-06	0.00109528	0.000373369	0.000185347	4.08466e-06
844	C85OOH	158.195	C85O + OH+ C85O + OH	OOC1CC(C(=O)C)C1(C)C	InChI=1S/C8H14O3/c1-5(9)6-4-7(11-10)8(6,2)3/h6-7,10H,4H2,1-3H3	J41+J22	9.77e-06	0.00109528	0.000846251	0.000185846	9.25799e-06
845	C86OOH	174.194	C86O + OH+ C86O + OH	O=CCC(C(=O)C)C(C)(C)OO	InChI=1S/C8H14O4/c1-6(10)7(4-5-9)8(2,3)12-11/h5,7,11H,4H2,1-3H3	J41+J15	2.569e-05	0.00288002	0.00268425	0.000565163	2.93657e-05
846	C87CO	170.163	C615CO3 + CO + HO2+ C615CO3 + CO + HO2	O=CC(=O)C(C=O)C(C)(C)C=O	InChI=1S/C8H10O4/c1-8(2,5-11)6(3-9)7(12)4-10/h3-6H,1-2H3	J34+J15.*2	0.0001648	0.0184751	0.00609	0.000960894	6.66246e-05
847	C87CO2H	200.189	C87O2 + HO2	O=CC(C(=O)CC(=O)O)C(C)(C)C=O	InChI=1S/C9H12O5/c1-9(2,5-11)6(4-10)7(12)3-8(13)14/h4-6H,3H2,1-2H3,(H,13,14)	J15.*2	3.98e-05	0.00446184	0.003964	0.000777234	4.33662e-05
848	C87CO3H	216.188	C87O2 + OH+ C87O2 + OH	OOC(=O)CC(=O)C(C=O)C(C)(C)C=O	InChI=1S/C9H12O6/c1-9(2,5-11)6(4-10)7(12)3-8(13)15-14/h4-6,14H,3H2,1-2H3	J41+J15.*2	4.559e-05	0.00511093	0.00433737	0.000799029	4.74508e-05
849	C87OOH	188.178	C87O + OH	OOCC(=O)C(C=O)C(C)(C)C=O	InChI=1S/C8H12O5/c1-8(2,5-10)6(3-9)7(11)4-13-12/h3,5-6,12H,4H2,1-2H3	J41	5.79e-06	0.000649096	0.00481025	0.000799145	5.26241e-05
850	C88CHO	168.19	C88O2 + HO2 + CO	O=CC1C(=O)CCC(=O)C1(C)C	InChI=1S/C9H12O3/c1-9(2)6(5-10)7(11)3-4-8(9)12/h5-6H,3-4H2,1-2H3	J15	1.99e-05	0.00223092	0.002414	0.000594623	2.64092e-05
851	C88CO3H	200.189	C88O2 + OH	OOC(=O)C1C(=O)CCC(=O)C1(C)C	InChI=1S/C9H12O5/c1-9(2)6(11)4-3-5(10)7(9)8(12)14-13/h7,13H,3-4H2,1-2H3	J41	5.79e-06	0.000649096	0.000661369	0.00026212	7.23538e-06
852	C88OOH	172.179	C88O + OH	OOC1C(=O)CCC(=O)C1(C)C	InChI=1S/C8H12O4/c1-8(2)6(10)4-3-5(9)7(8)12-11/h7,11H,3-4H2,1-2H3	J41	5.79e-06	0.000649096	0.00113425	0.000262474	1.24087e-05
853	C89CO2H	170.206	C89CO2 + HO2	O=CCC1CC(C(=O)O)C1(C)C	InChI=1S/C9H14O3/c1-9(2)6(3-4-10)5-7(9)8(11)12/h4,6-7H,3,5H2,1-2H3,(H,11,12)	J15	1.99e-05	0.00223092	0.001838	0.000533732	2.01077e-05
854	C89CO3H	186.205	C89CO2 + OH+ C89CO2 + OH	O=CCC1CC(C(=O)OO)C1(C)C	InChI=1S/C9H14O4/c1-9(2)6(3-4-10)5-7(9)8(11)13-12/h4,6-7,12H,3,5H2,1-2H3	J41+J15	2.569e-05	0.00288002	0.002126	0.000564999	2.32584e-05
855	C89NO3	187.193	C89O + NO2+ C89O + NO2	O=CCC1CC(ON(=O)=O)C1(C)C	InChI=1S/C8H13NO4/c1-8(2)6(3-4-10)5-7(8)13-9(11)12/h4,6-7H,3,5H2,1-2H3	J55+J15	2.823e-05	0.00316477	0.0064853	0.00133492	7.09492e-05
856	C89OH	142.196	C89O + HO2	O=CCC1CC(O)C1(C)C	InChI=1S/C8H14O2/c1-8(2)6(3-4-9)5-7(8)10/h4,6-7,10H,3,5H2,1-2H3	J15	1.99e-05	0.00223092	0.001838	0.000533732	2.01077e-05
857	C89OOH	158.195	C89O + OH+ C89O + OH	O=CCC1CC(OO)C1(C)C	InChI=1S/C8H14O3/c1-8(2)6(3-4-9)5-7(8)11-10/h4,6-7,10H,3,5H2,1-2H3	J41+J15	2.569e-05	0.00288002	0.00239625	0.000533906	2.6215e-05
858	C8BCNO3	171.194	C8BCO + NO2	O=N(=O)OC1CC2CC1C2(C)C	InChI=1S/C8H13NO3/c1-8(2)5-3-6(8)7(4-5)12-9(10)11/h5-7H,3-4H2,1-2H3	J54	2.99e-06	0.000335198	6.8088e-05	3.23144e-05	7.44882e-07
859	C8BCOOH	142.196	C8BCO + OH	OOC1CC2CC1C2(C)C	InChI=1S/C8H14O2/c1-8(2)5-3-6(8)7(4-5)10-9/h5-7,9H,3-4H2,1-2H3	J41	5.79e-06	0.000649096	0.000558251	1.36143e-05	6.10727e-06
860	C8CO2DBAL	154.163	C7DCCO3 + HO2 + CO	CCCC(=O)C=CC(=O)C=O	InChI=1S/C8H10O3/c1-2-3-7(10)4-5-8(11)6-9/h4-6H,2-3H2,1H3	J34	0.000125	0.0140133	0.125834	0.0120216	0.00137663
861	C8CO2DCO3H	186.162	C3H7CO3 + C33CO + OH+ C3H7CO3 + C33CO + OH	CCCC(=CC(=O)C=O)C(=O)OO	InChI=1S/C8H10O5/c1-2-3-6(8(11)13-12)4-7(10)5-9/h4-5,12H,2-3H2,1H3	J41+J34	0.00013079	0.0146624	0.00246044	0.000582259	2.69172e-05
862	C8CO4DB	168.147	C5CO2DBCO3 + CH3CO3+ C5CO2DBCO3 + CH3CO3	O=CC(=O)C=C(C)C(=O)C(=O)C	InChI=1S/C8H8O4/c1-5(3-7(11)4-9)8(12)6(2)10/h3-4H,1-2H3	J34+J35	0.000393	0.0440578	0.0307814	0.00764406	0.000336748
863	C8DCO2CO3H	186.162	IPRCO3 + C33CO + OH+ IPRCO3 + C33CO + OH	O=CC(=O)C=C(C(C)C)C(=O)OO	InChI=1S/C8H10O5/c1-5(2)7(8(11)13-12)3-6(10)4-9/h3-5,12H,1-2H3	J41+J34	0.00013079	0.0146624	0.00225781	0.000551971	2.47004e-05
864	C8M2CO6OH	170.206	C7DDICARB + HO2 + CH3CO3+ C7DDICARB + HO2 + CH3CO3	CCC(=O)C=C(C)C(O)C(=O)C	InChI=1S/C9H14O3/c1-4-8(11)5-6(2)9(12)7(3)10/h5,9,12H,4H2,1-3H3	J23+J22	5.78e-06	0.000647975	0.000622439	0.000232715	6.80948e-06
865	C8M2CO6OOH	186.205	C7DDICARB + CH3CO3 + OH+ C8M2CO6O + OH+ CO24C53OOH + C2H5CO3 + HO2 + CO	OOC(C(=O)C)C(=CC(=O)CC)C	InChI=1S/C9H14O4/c1-4-8(11)5-6(2)9(13-12)7(3)10/h5,9,12H,4H2,1-3H3	J22+J41+J23	1.157e-05	0.00129707	0.00118069	0.000233113	1.29167e-05
866	C8M3CO	168.19	C5CO234 + C2H5CO3 + HO2 + CO+ C5CO234 + C2H5CO3 + HO2 + CO	CCC(=O)C=C(C)C(=O)C(=O)C	InChI=1S/C9H12O3/c1-4-8(11)5-6(2)9(12)7(3)10/h5H,4H2,1-3H3	J35+J23	0.0002698	0.0302463	0.0289434	0.0076254	0.000316641
867	C8O2OHCO3H	216.188	C62CHO + HO2 + CO + OH+ C62CHO + HO2 + CO + OH+ C62CHO + HO2 + CO + OH	OOC(=O)C=C(C(C)C)C(=O)C(O)C=O	InChI=1S/C9H12O6/c1-5(2)6(3-8(12)15-14)9(13)7(11)4-10/h3-5,7,11,14H,1-2H3	J41+J17+J22	6.477e-05	0.00726114	0.00225781	0.000551971	2.47004e-05
868	C8OHO2CO3H	216.188	C61CHO + HO2 + CO + OH+ C61CHO + HO2 + CO + OH+ C61CHO + HO2 + CO + OH	CCCC(=CC(=O)OO)C(=O)C(O)C=O	InChI=1S/C9H12O6/c1-2-3-6(4-8(12)15-14)9(13)7(11)5-10/h4-5,7,11,14H,2-3H2,1H3	J41+J17+J22	6.477e-05	0.00726114	0.00246044	0.000582259	2.69172e-05
869	C914CO	182.173	C87CO3	O=CC1C(=O)CC(=O)C(=O)C1(C)C	InChI=1S/C9H10O4/c1-9(2)5(4-10)6(11)3-7(12)8(9)13/h4-5H,3H2,1-2H3	J15	1.99e-05	0.00223092	0.0307349	0.00764501	0.00033624
870	C914OOH	200.189	C914O + OH+ C914O + OH	OOC1C(=O)CC(=O)C(C=O)C1(C)C	InChI=1S/C9H12O5/c1-9(2)5(4-10)6(11)3-7(12)8(9)14-13/h4-5,8,13H,3H2,1-2H3	J41+J15	2.569e-05	0.00288002	0.00326025	0.000622989	3.56671e-05
871	C915NO3	215.203	C915O + NO2+ C915O + NO2	O=CC1C(=O)CCC(ON(=O)=O)C1(C)C	InChI=1S/C9H13NO5/c1-9(2)6(5-11)7(12)3-4-8(9)15-10(13)14/h5-6,8H,3-4H2,1-2H3	J54+J15	2.289e-05	0.00256612	0.00384726	0.00091486	4.20891e-05
872	C915OOH	186.205	C915O + OH+ C915O + OH	OOC1CCC(=O)C(C=O)C1(C)C	InChI=1S/C9H14O4/c1-9(2)6(5-10)7(11)3-4-8(9)13-12/h5-6,8,12H,3-4H2,1-2H3	J41+J15	2.569e-05	0.00288002	0.00297225	0.000594779	3.25164e-05
873	C916NO3	231.203	C916O + NO2+ C916O + NO2	O=CCCC(=O)C(C=O)C(C)(C)ON(=O)=O	InChI=1S/C9H13NO6/c1-9(2,16-10(14)15)7(6-12)8(13)4-3-5-11/h5-7H,3-4H2,1-2H3	J54+J15.*2	4.279e-05	0.00479704	0.008614	0.00107526	9.42372e-05
874	C916OH	186.205	C916O + HO2	O=CCCC(=O)C(C=O)C(C)(C)O	InChI=1S/C9H14O4/c1-9(2,13)7(6-11)8(12)4-3-5-10/h5-7,13H,3-4H2,1-2H3	J15.*2	3.98e-05	0.00446184	0.004252	0.000799029	4.65169e-05
875	C916OOH	202.204	C916O + OH+ C916O + OH	O=CCCC(=O)C(C=O)C(C)(C)OO	InChI=1S/C9H14O5/c1-9(2,14-13)7(6-11)8(12)4-3-5-10/h5-7,13H,3-4H2,1-2H3	J41+J15.*2	4.559e-05	0.00511093	0.00481025	0.000799145	5.26241e-05
876	C917NO3	215.203	C917O + NO2	O=C1CCC(=O)C(C1)C(C)(C)ON(=O)=O	InChI=1S/C9H13NO5/c1-9(2,15-10(13)14)7-5-6(11)3-4-8(7)12/h7H,3-5H2,1-2H3	J55	8.33e-06	0.000933847	0.00442211	0.000743034	4.83779e-05
877	C917OOH	186.205	C917O + OH	OOC(C)(C)C1CC(=O)CCC1=O	InChI=1S/C9H14O4/c1-9(2,13-12)7-5-6(10)3-4-8(7)11/h7,12H,3-5H2,1-2H3	J41	5.79e-06	0.000649096	0.0032591	0.000185846	3.56545e-05
878	C918CHO	168.233	NOPINONE + CO + HO2 + HO2	O=CC1(O)CCC2CC1C2(C)C	InChI=1S/C10H16O2/c1-9(2)7-3-4-10(12,6-11)8(9)5-7/h6-8,12H,3-5H2,1-2H3	J17	5.5e-05	0.00616586	0.001838	0.000533732	2.01077e-05
879	C918CO3H	200.232	NOPINONE + HO2 + OH	OOC(=O)C1(O)CCC2CC1C2(C)C	InChI=1S/C10H16O4/c1-9(2)6-3-4-10(12,7(9)5-6)8(11)14-13/h6-7,12-13H,3-5H2,1-2H3	J41	5.79e-06	0.000649096	8.5369e-05	NaN	9.33937e-07
880	C918NO3	215.203	C918O + NO2+ C918O + NO2	O=CCC(=O)C1CC(ON(=O)=O)C1(C)C	InChI=1S/C9H13NO5/c1-9(2)6(7(12)3-4-11)5-8(9)15-10(13)14/h4,6,8H,3,5H2,1-2H3	J55+J15	2.823e-05	0.00316477	0.00384726	0.00091486	4.20891e-05
881	C918OH	170.206	C918O + HO2	O=CCC(=O)C1CC(O)C1(C)C	InChI=1S/C9H14O3/c1-9(2)6(5-8(9)12)7(11)3-4-10/h4,6,8,12H,3,5H2,1-2H3	J15	1.99e-05	0.00223092	0.002126	0.000564999	2.32584e-05
882	C918OOH	186.205	C918O + OH+ C918O + OH	O=CCC(=O)C1CC(OO)C1(C)C	InChI=1S/C9H14O4/c1-9(2)6(5-8(9)13-12)7(11)3-4-10/h4,6,8,12H,3,5H2,1-2H3	J41+J15	2.569e-05	0.00288002	0.00268425	0.000565163	2.93657e-05
883	C919NO3	231.203	C919O + NO2+ C919O + NO2	O=CCC(=O)C(CC=O)C(C)(C)ON(=O)=O	InChI=1S/C9H13NO6/c1-9(2,16-10(14)15)7(3-5-11)8(13)4-6-12/h5-7H,3-4H2,1-2H3	J55+J15.*2	4.813e-05	0.00539568	0.008326	0.00105917	9.10864e-05
884	C919OH	186.205	C919O + HO2	O=CCC(=O)C(CC=O)C(C)(C)O	InChI=1S/C9H14O4/c1-9(2,13)7(3-5-10)8(12)4-6-11/h5-7,13H,3-4H2,1-2H3	J15	1.99e-05	0.00223092	0.003964	0.000777234	4.33662e-05
885	C919OOH	202.204	C919O + OH+ C919O + OH	O=CCC(=O)C(CC=O)C(C)(C)OO	InChI=1S/C9H14O5/c1-9(2,14-13)7(3-5-10)8(12)4-6-11/h5-7,13H,3-4H2,1-2H3	J41+J15.*2	4.559e-05	0.00511093	0.00452225	0.000777354	4.94734e-05
886	C91OOH	174.237	C91O + OH+ C91O + OH	CCCCC(OO)CC(=O)CC	InChI=1S/C9H18O3/c1-3-5-6-9(12-11)7-8(10)4-2/h9,11H,3-7H2,1-2H3	J41+J22	9.77e-06	0.00109528	0.000846251	0.000185846	9.25799e-06
887	C920CO3H	216.231	C920O2 + OH+ C920O2 + OH	OOC(=O)CC1CC(C(=O)CO)C1(C)C	InChI=1S/C10H16O5/c1-10(2)6(4-9(13)15-14)3-7(10)8(12)5-11/h6-7,11,14H,3-5H2,1-2H3	J41+J22	9.77e-06	0.00109528	0.000373369	0.000185347	4.08466e-06
888	C920OOH	188.221	C920O + OH+ C920O + OH	OOCC1CC(C(=O)CO)C1(C)C	InChI=1S/C9H16O4/c1-9(2)6(5-13-12)3-7(9)8(11)4-10/h6-7,10,12H,3-5H2,1-2H3	J41+J22	9.77e-06	0.00109528	0.000846251	0.000185846	9.25799e-06
889	C921OOH	204.22	C921O + OH+ C921O + OH	OCC(=O)C1(OO)CC(CO)C1(C)C	InChI=1S/C9H16O5/c1-8(2)6(4-10)3-9(8,14-13)7(12)5-11/h6,10-11,13H,3-5H2,1-2H3	J41+J22	9.77e-06	0.00109528	0.00082554	0.000185846	9.03141e-06
890	C922OOH	220.22	C922O + OH+ C922O + OH	OCC(=O)C(=O)CC(CO)C(C)(C)OO	InChI=1S/C9H16O6/c1-9(2,15-14)6(4-10)3-7(12)8(13)5-11/h6,10-11,14H,3-5H2,1-2H3	J41+J22	9.77e-06	0.00109528	0.0291465	0.00762412	0.000318863
891	C923CO3H	200.232	C923O2 + OH	OOC(=O)CC(CCC(=O)C)C(=C)C	InChI=1S/C10H16O4/c1-7(2)9(5-4-8(3)11)6-10(12)14-13/h9,13H,1,4-6H2,2-3H3	J41	5.79e-06	0.000649096	0.000419808	0.000140722	4.5927e-06
892	C923NO3	201.22	C923O + NO2	CC(=O)CCC(CO[N+](=O)[O-])C(=C)C	InChI=1S/C9H15NO4/c1-7(2)9(5-4-8(3)11)6-14-10(12)13/h9H,1,4-6H2,2-3H3	J53	1.79e-06	0.000200671	0.0147963	0.000743034	0.000161872
893	C923OOH	172.221	C923O + OH	OOCC(CCC(=O)C)C(=C)C	InChI=1S/C9H16O3/c1-7(2)9(6-12-11)5-4-8(3)10/h9,11H,1,4-6H2,2-3H3	J41	5.79e-06	0.000649096	0.00089269	0.000141379	9.76603e-06
894	C924CO	170.206	C622CO3 + CH3CO3	OCC(CC(=O)C(=O)C)C(=C)C	InChI=1S/C9H14O3/c1-6(2)8(5-10)4-9(12)7(3)11/h8,10H,1,4-5H2,2-3H3	J35	0.000268	0.0300445	0.0286089	0.00762411	0.000312982
895	C924OOH	188.221	C924O + OH	OCC(CC(OO)C(=O)C)C(=C)C	InChI=1S/C9H16O4/c1-6(2)8(5-10)4-9(13-12)7(3)11/h8-10,12H,1,4-5H2,2-3H3	J41	5.79e-06	0.000649096	0.000871979	0.000141379	9.53945e-06
896	C925OOH	220.22	C925O + OH	OCC(CC(=O)C(=O)C)C(C)(CO)OO	InChI=1S/C9H16O6/c1-6(12)8(13)3-7(4-10)9(2,5-11)15-14/h7,10-11,14H,3-5H2,1-2H3	J41	5.79e-06	0.000649096	0.0291465	0.00762412	0.000318863
897	C926OH	186.205	C926O + HO2	O=CCC(O)(CCC(=O)C)C(=O)C	InChI=1S/C9H14O4/c1-7(11)3-4-9(13,5-6-10)8(2)12/h6,13H,3-5H2,1-2H3	J15.*2	3.98e-05	0.00446184	0.002414	0.000594623	2.64092e-05
898	C926OOH	202.204	C926O + OH+ C926O + OH	O=CCC(OO)(CCC(=O)C)C(=O)C	InChI=1S/C9H14O5/c1-7(11)3-4-9(14-13,5-6-10)8(2)12/h6,13H,3-5H2,1-2H3	J41+J15.*2	4.559e-05	0.00511093	0.00297225	0.000594779	3.25164e-05
899	C927NO3	217.219	C927O + NO2	OCCC(=C)C(=O)CC(C)(C)O[N+](=O)[O-]	InChI=1S/C9H15NO5/c1-7(4-5-11)8(12)6-9(2,3)15-10(13)14/h11H,1,4-6H2,2-3H3	J55	8.33e-06	0.000933847	0.0147963	0.000743034	0.000161872
900	C927OOH	188.221	C927O + OH	OCCC(=C)C(=O)CC(C)(C)OO	InChI=1S/C9H16O4/c1-7(4-5-10)8(11)6-9(2,3)13-12/h10,12H,1,4-6H2,2-3H3	J41	5.79e-06	0.000649096	0.000871979	0.000141379	9.53945e-06
901	C928CO3H	216.231	C928O2 + OH	OOC(=O)CC(C)(C)C(=O)CCC(=O)C	InChI=1S/C10H16O5/c1-7(11)4-5-8(12)10(2,3)6-9(13)15-14/h14H,4-6H2,1-3H3	J41	5.79e-06	0.000649096	0.000661369	0.00026212	7.23538e-06
902	C928NO3	217.219	C928O + NO2	CC(=O)CCC(=O)C(C)(C)CO[N+](=O)[O-]	InChI=1S/C9H15NO5/c1-7(11)4-5-8(12)9(2,3)6-15-10(13)14/h4-6H2,1-3H3	J53	1.79e-06	0.000200671	0.004938	0.000765802	5.40217e-05
903	C928OOH	188.221	C928O + OH	OOCC(C)(C)C(=O)CCC(=O)C	InChI=1S/C9H16O4/c1-7(10)4-5-8(11)9(2,3)6-13-12/h12H,4-6H2,1-3H3	J41	5.79e-06	0.000649096	0.00113425	0.000262474	1.24087e-05
904	C929CO	186.205	CO2C3CO3 + HM22CO3	OCC(C)(C)C(=O)C(=O)CC(=O)C	InChI=1S/C9H14O4/c1-6(11)4-7(12)8(13)9(2,3)5-10/h10H,4-5H2,1-3H3	J35	0.000268	0.0300445	0.0288969	0.00762636	0.000316133
905	C929OOH	204.22	C929O + OH	OOC(CC(=O)C)C(=O)C(C)(C)CO	InChI=1S/C9H16O5/c1-6(11)4-7(14-13)8(12)9(2,3)5-10/h7,10,13H,4-5H2,1-3H3	J41	5.79e-06	0.000649096	0.00111354	0.000262474	1.21821e-05
906	C92OOH	190.237	C92O + OH+ C92O + OH	CC(OO)C(=O)CC(O)CCCC	InChI=1S/C9H18O4/c1-3-4-5-8(10)6-9(11)7(2)13-12/h7-8,10,12H,3-6H2,1-2H3	J41+J22	9.77e-06	0.00109528	0.00082554	0.000185846	9.03141e-06
907	C930NO3	231.203	C930O + NO2	O=CCCC(=O)C(=O)CC(C)(C)O[N+](=O)[O-]	InChI=1S/C9H13NO6/c1-9(2,16-10(14)15)6-8(13)7(12)4-3-5-11/h5H,3-4,6H2,1-2H3	J55	8.33e-06	0.000933847	0.0436177	0.00774009	0.000477178
908	C930OOH	202.204	C930O + OH	O=CCCC(=O)C(=O)CC(C)(C)OO	InChI=1S/C9H14O5/c1-9(2,14-13)6-8(12)7(11)4-3-5-10/h5,13H,3-4,6H2,1-2H3	J41	5.79e-06	0.000649096	0.0310052	0.00764278	0.000339197
909	C93CO	172.221	CO3C4CO3 + C3H7CHO + HO2	CCCC(O)C(=O)CC(=O)CC	InChI=1S/C9H16O3/c1-3-5-8(11)9(12)6-7(10)4-2/h8,11H,3-6H2,1-2H3	J22.*2	7.96e-06	0.000892368	0.000576	0.00026212	6.30144e-06
910	C93NO3	219.235	C93O + NO2	CCCC(O)C(CC(=O)CC)ON(=O)=O	InChI=1S/C9H17NO5/c1-3-5-8(12)9(15-10(13)14)6-7(11)4-2/h8-9,12H,3-6H2,1-2H3	J22	3.98e-06	0.000446184	0.00465	0.000743034	5.0871e-05
911	C93OH	174.237	C93O + HO2	CCCC(O)C(O)CC(=O)CC	InChI=1S/C9H18O3/c1-3-5-8(11)9(12)6-7(10)4-2/h8-9,11-12H,3-6H2,1-2H3	J22	3.98e-06	0.000446184	0.000288	0.000185347	3.15072e-06
912	C93OOH	190.237	C93O + OH+ C93O + OH	CCCC(O)C(OO)CC(=O)CC	InChI=1S/C9H18O4/c1-3-5-8(11)9(13-12)6-7(10)4-2/h8-9,11-12H,3-6H2,1-2H3	J41+J22	9.77e-06	0.00109528	0.00082554	0.000185846	9.03141e-06
913	C94OH	172.221	C3H7CO3 + CO3C4CHO + HO2	CCCC(=O)C(O)CC(=O)CC	InChI=1S/C9H16O3/c1-3-5-8(11)9(12)6-7(10)4-2/h9,12H,3-6H2,1-2H3	J22.*2	7.96e-06	0.000892368	0.000576	0.00026212	6.30144e-06
914	C94OOH	188.221	C3H7CO3 + CO3C4CHO + OH+ C94O + OH	CCCC(=O)C(OO)CC(=O)CC	InChI=1S/C9H16O4/c1-3-5-8(11)9(13-12)6-7(10)4-2/h9,12H,3-6H2,1-2H3	J22.*2+J41	1.375e-05	0.00154146	0.00113425	0.000262474	1.24087e-05
915	C95OOH	202.204	C95O + OH+ C95O + OH+ C95O + OH	CCCC(=O)C(=O)C(OO)C(=O)CC	InChI=1S/C9H14O5/c1-3-5-7(11)8(12)9(14-13)6(10)4-2/h9,13H,3-5H2,1-2H3	J41+J22+J35	0.00027777	0.0311398	0.0294552	0.00762637	0.00032224
916	C96NO3	201.22	C96O + NO2+ C96O + NO2	O=N(=O)OCC1CC(C(=O)C)C1(C)C	InChI=1S/C9H15NO4/c1-6(11)8-4-7(9(8,2)3)5-14-10(12)13/h7-8H,4-5H2,1-3H3	J53+J22	5.77e-06	0.000646854	0.00200926	0.000743034	2.19814e-05
917	C96OH	156.222	C96O + HO2	OCC1CC(C(=O)C)C1(C)C	InChI=1S/C9H16O2/c1-6(11)8-4-7(5-10)9(8,2)3/h7-8,10H,4-5H2,1-3H3	J22	3.98e-06	0.000446184	0.000288	0.000185347	3.15072e-06
918	C96OOH	172.221	C96O + OH+ C96O + OH	OOCC1CC(C(=O)C)C1(C)C	InChI=1S/C9H16O3/c1-6(10)8-4-7(5-12-11)9(8,2)3/h7-8,11H,4-5H2,1-3H3	J41+J22	9.77e-06	0.00109528	0.000846251	0.000185846	9.25799e-06
919	C97OH	172.221	C97O + HO2	OCC1CC(O)(C(=O)C)C1(C)C	InChI=1S/C9H16O3/c1-6(11)9(12)4-7(5-10)8(9,2)3/h7,10,12H,4-5H2,1-3H3	J22	3.98e-06	0.000446184	0.000288	0.000185347	3.15072e-06
920	C97OOH	188.221	C97O + OH+ C97O + OH	OCC1CC(OO)(C(=O)C)C1(C)C	InChI=1S/C9H16O4/c1-6(11)9(13-12)4-7(5-10)8(9,2)3/h7,10,12H,4-5H2,1-3H3	J41+J22	9.77e-06	0.00109528	0.00082554	0.000185846	9.03141e-06
921	C98NO3	233.219	C98O + NO2+ C98O + NO2	OCC(CC(=O)C(=O)C)C(C)(C)ON(=O)=O	InChI=1S/C9H15NO6/c1-6(12)8(13)4-7(5-11)9(2,3)16-10(14)15/h7,11H,4-5H2,1-3H3	J55+J35	0.00027633	0.0309784	0.0288017	0.00762417	0.00031509
922	C98OH	188.221	C98O + HO2	OCC(CC(=O)C(=O)C)C(C)(C)O	InChI=1S/C9H16O4/c1-6(11)8(12)4-7(5-10)9(2,3)13/h7,10,13H,4-5H2,1-3H3	J35	0.000268	0.0300445	0.0286089	0.00762411	0.000312982
923	C98OOH	204.22	C98O + OH+ C98O + OH	OCC(CC(=O)C(=O)C)C(C)(C)OO	InChI=1S/C9H16O5/c1-6(11)8(12)4-7(5-10)9(2,3)14-13/h7,10,13H,4-5H2,1-3H3	J41+J35	0.00027379	0.0306936	0.0291465	0.00762412	0.000318863
924	C9DCNO3	213.187	C9DCO + NO2	O=N(=O)OC1C2C(=O)CC(=O)C1C2(C)C	InChI=1S/C9H11NO5/c1-9(2)6-4(11)3-5(12)7(9)8(6)15-10(13)14/h6-8H,3H2,1-2H3	J54	2.99e-06	0.000335198	0.00229726	0.000765802	2.51321e-05
925	C9DCOOH	184.189	C9DCO + OH	OOC1C2C(=O)CC(=O)C1C2(C)C	InChI=1S/C9H12O4/c1-9(2)6-4(10)3-5(11)7(9)8(6)13-12/h6-8,12H,3H2,1-2H3	J41	5.79e-06	0.000649096	0.00113425	0.000262474	1.24087e-05
926	C9M2CO6OH	184.232	C7DDICARB + HO2 + C2H5CO3+ C7DDICARB + HO2 + C2H5CO3	CCC(=O)C=C(C)C(O)C(=O)CC	InChI=1S/C10H16O3/c1-4-8(11)6-7(3)10(13)9(12)5-2/h6,10,13H,4-5H2,1-3H3	J23+J22	5.78e-06	0.000647975	0.000622439	0.000232715	6.80948e-06
927	C9M2CO6OOH	200.232	C7DDICARB + C2H5CO3 + OH+ C9M2CO6O + OH+ C9M2CO6O + OH	CCC(=O)C=C(C)C(OO)C(=O)CC	InChI=1S/C10H16O4/c1-4-8(11)6-7(3)10(14-13)9(12)5-2/h6,10,13H,4-5H2,1-3H3	J22+J41+J23	1.157e-05	0.00129707	0.00118069	0.000233113	1.29167e-05
928	C9M3CO	182.216	CO234C6 + C2H5CO3 + HO2 + CO+ CO234C6 + C2H5CO3 + HO2 + CO	CCC(=O)C=C(C)C(=O)C(=O)CC	InChI=1S/C10H14O3/c1-4-8(11)6-7(3)10(13)9(12)5-2/h6H,4-5H2,1-3H3	J35+J23	0.0002698	0.0302463	0.0289434	0.0076254	0.000316641
929	CATEC1OOH	126.11	CATEC1O + OH	OOc1ccccc1O	InChI=1S/C6H6O3/c7-5-3-1-2-4-6(5)9-8/h1-4,7-8H	J41	5.79e-06	0.000649096	0.00053754	1.36143e-05	5.88069e-06
930	CCL2CL2OOH	199.848	CHCL2CL2O + OH	OOC(Cl)(Cl)C(Cl)Cl	InChI=1S/C2H2Cl4O2/c3-1(4)2(5,6)8-7/h1,7H	J41	5.79e-06	0.000649096	0.000558251	1.36143e-05	6.10727e-06
931	CCL2OHCOCL	163.387	COCL2 + CO + CL + HO2	ClC(=O)C(O)(Cl)Cl	InChI=1S/C2HCl3O2/c3-1(6)2(4,5)7/h7H	J15	1.99e-05	0.00223092	0.000288	0.000185347	3.15072e-06
932	CCL3CH2OOH	165.403	CCL3CH2O + OH	OOCC(Cl)(Cl)Cl	InChI=1S/C2H3Cl3O2/c3-2(4,5)1-7-6/h6H,1H2	J41	5.79e-06	0.000649096	0.000558251	1.36143e-05	6.10727e-06
933	CCL3CHO	147.388	CCL3O2 + HO2 + CO	O=CC(Cl)(Cl)Cl	InChI=1S/C2HCl3O/c3-2(4,5)1-6/h1H	J11	3.26e-05	0.00365467	0.000584	0.000207	6.38896e-06
934	CCL3CO3H	179.387	CCL3O2 + OH	OOC(=O)C(Cl)(Cl)Cl	InChI=1S/C2HCl3O3/c3-2(4,5)1(6)8-7/h7H	J41	5.79e-06	0.000649096	8.5369e-05	NaN	9.33937e-07
935	CCL3OOH	151.376	CCL3O + OH	OOC(Cl)(Cl)Cl	InChI=1S/CHCl3O2/c2-1(3,4)6-5/h5H	J41	5.79e-06	0.000649096	0.000558251	1.36143e-05	6.10727e-06
936	CCLCONO3	139.495	CHOCL + CO + HO2 + NO2+ HO2 +CO + CHOCL + NO2	O=CC(Cl)ON(=O)=O	InChI=1S/C2H2ClNO4/c3-2(1-5)8-4(6)7/h1-2H	J56.*10+J15	0.0003359	0.0376566	0.0150088	NaN	0.000164196
937	CCLNO3COOH	157.51	CCLNO3CO + OH	OOCC(Cl)ON(=O)=O	InChI=1S/C2H4ClNO5/c3-2(1-8-7)9-4(5)6/h2,7H,1H2	J41	5.79e-06	0.000649096	0.000713213	4.35803e-05	7.80255e-06
938	CCLOHCHO	94.497	CHCLOHCO + OH	OC(Cl)C=O	InChI=1S/C2H3ClO2/c3-2(5)1-4/h1-2,5H	J15	1.99e-05	0.00223092	0.000584	0.000207	6.38896e-06
939	CCLOHCOCL	128.942	CHOCL + CHOCL + HO2	ClC(=O)C(O)Cl	InChI=1S/C2H2Cl2O2/c3-1(5)2(4)6/h1,5H	J15	1.99e-05	0.00223092	0.000288	0.000185347	3.15072e-06
940	CCLOHCOOH	112.512	CHCLOHCO + OH	OOCC(O)Cl	InChI=1S/C2H5ClO3/c3-2(4)1-6-5/h2,4-5H,1H2	J41	5.79e-06	0.000649096	0.00053754	1.36143e-05	5.88069e-06
941	CCOCOCOH	102.089	CH3CHOHCO3 + CO + HO2	CC(O)C(=O)C=O	InChI=1S/C4H6O3/c1-3(6)4(7)2-5/h2-3,6H,1H3	J34	0.000125	0.0140133	0.0142087	0.00046023	0.000155444
942	CH2BROOH	126.937	CH2BRO + OH	OOCBr	InChI=1S/CH3BrO2/c2-1-4-3/h3H,1H2	J41	5.79e-06	0.000649096	0.000558251	1.36143e-05	6.10727e-06
943	CH2CHCH2NO3	103.077	CH2CHCH2O + NO2	[O-][N+](=O)OCC=C	InChI=1S/C3H5NO3/c1-2-3-7-4(5)6/h2H,1,3H2	J53	1.79e-06	0.000200671	0.000190129	3.66408e-05	2.08001e-06
944	CH2CHCH2OOH	74.0785	CH2CHCH2O + OH	OOCC=C	InChI=1S/C3H6O2/c1-2-3-5-4/h2,4H,1,3H2	J41	5.79e-06	0.000649096	0.000558251	1.36143e-05	6.10727e-06
945	CH2CL3OOH	165.403	CH2CL3O + OH	ClCC(Cl)(Cl)OO	InChI=1S/C2H3Cl3O2/c3-1-2(4,5)7-6/h6H,1H2	J41	5.79e-06	0.000649096	0.000558251	1.36143e-05	6.10727e-06
946	CH2CLCOCH3	92.5242	CH3O2 + CLETO3	CC(=O)CCl	InChI=1S/C3H5ClO/c1-3(5)2-4/h2H2,1H3	J22	3.98e-06	0.000446184	7.26e-05	2.23556e-05	7.94244e-07
947	CH2CLCOCL	112.943	CH2CLO2 + CO + CL	ClCC(=O)Cl	InChI=1S/C2H2Cl2O/c3-1-2(4)5/h1H2	J22	3.98e-06	0.000446184	0.000288	0.000185347	3.15072e-06
948	CH2CLCOOH	96.5129	CH2CLCH2O + OH	OOCCCl	InChI=1S/C2H5ClO2/c3-1-2-5-4/h4H,1-2H2	J41	5.79e-06	0.000649096	0.000558251	1.36143e-05	6.10727e-06
949	CH2CLOOH	82.4863	CH2CLO + OH	OOCCl	InChI=1S/CH3ClO2/c2-1-4-3/h3H,1H2	J41	5.79e-06	0.000649096	0.000558251	1.36143e-05	6.10727e-06
950	CH2OHCL2O2H	146.957	CH2OHCL2O + OH	OCC(OO)(Cl)Cl	InChI=1S/C2H4Cl2O3/c3-2(4,1-5)7-6/h5-6H,1H2	J41	5.79e-06	0.000649096	0.00053754	1.36143e-05	5.88069e-06
951	CH2OHCOCL	94.497	HCHO + HO2 + CL + CO	OCC(=O)Cl	InChI=1S/C2H3ClO2/c3-2(5)1-4/h4H,1H2	J15	1.99e-05	0.00223092	0.000288	0.000185347	3.15072e-06
952	CH3CCL2OOH	130.958	CH3CCL2O + OH	OOC(C)(Cl)Cl	InChI=1S/C2H4Cl2O2/c1-2(3,4)6-5/h5H,1H3	J41	5.79e-06	0.000649096	0.000558251	1.36143e-05	6.10727e-06
953	CH3CHCLOOH	96.5129	CH3CHCLO + OH	CC(Cl)OO	InChI=1S/C2H5ClO2/c1-2(3)5-4/h2,4H,1H3	J41	5.79e-06	0.000649096	0.000558251	1.36143e-05	6.10727e-06
954	CH3CHO	44.0526	CH3O2 + HO2 + CO	CC=O	InChI=1S/C2H4O/c1-2-3/h2H,1H3	J13	4.84e-06	0.000542595	0.000584	0.000207	6.38896e-06
955	CH3CHOHCHO	74.0785	CH3CHO + HO2 + CO + HO2	CC(O)C=O	InChI=1S/C3H6O2/c1-3(5)2-4/h2-3,5H,1H3	J17	5.5e-05	0.00616586	0.00241	0.00231	2.63654e-05
956	CH3CLCOCL	126.969	CH3CHCLO2 + CO + CL	ClC(=O)C(C)Cl	InChI=1S/C3H4Cl2O/c1-2(4)3(5)6/h2H,1H3	J22	3.98e-06	0.000446184	0.00242385	2.23556e-05	2.65169e-05
957	CH3CO3H	76.0514	CH3O2 + OH	CC(=O)OO	InChI=1S/C2H4O3/c1-2(3)5-4/h4H,1H3	J41	5.79e-06	0.000649096	8.5369e-05	NaN	9.33937e-07
958	CH3COCH3	58.0791	CH3CO3 + CH3O2	CC(=O)C	InChI=1S/C3H6O/c1-3(2)4/h1-2H3	J21	6.09e-07	6.82728e-05	7.26e-05	2.23556e-05	7.94244e-07
959	CH3COCL	78.4976	CH3CO3 + CL	CC(=O)Cl	InChI=1S/C2H3ClO/c1-2(3)4/h1H3	J22	3.98e-06	0.000446184	0.000288	0.000185347	3.15072e-06
960	CH3COCLOOH	124.523	CH3COCCLO + OH	CC(=O)C(Cl)OO	InChI=1S/C3H5ClO3/c1-2(5)3(4)7-6/h3,6H,1H3	J41	5.79e-06	0.000649096	0.000630851	2.61748e-05	6.90151e-06
961	CH3COCO2H	88.0621	CH3CO3 + HO2	OC(=O)C(=O)C	InChI=1S/C3H4O3/c1-2(4)3(5)6/h1H3,(H,5,6)	J34	0.000125	0.0140133	0.0186	0.016	0.000203484
962	CH3COCO3H	104.061	CH3CO3 + OH+ CH3CO3 + OH	CC(=O)C(=O)OO	InChI=1S/C3H4O4/c1-2(4)3(5)7-6/h6H,1H3	J41+J35	0.00027379	0.0306936	0.0286089	0.00762411	0.000312982
963	CH3NO3	77.0394	CH3O + NO2	CON(=O)=O	InChI=1S/CH3NO3/c1-5-2(3)4/h1H3	J51	1.16e-06	0.000130044	0.00011193	7.7893e-06	1.22451e-06
964	CH3OCH2NO3	107.065	CH3OCH2O + NO2	COCON(=O)=O	InChI=1S/C2H5NO4/c1-6-2-7-3(4)5/h2H2,1H3	J53	1.79e-06	0.000200671	0.000154962	4.13992e-05	1.69528e-06
965	CH3OCH2OOH	78.0672	CH3OCH2O + OH	COCOO	InChI=1S/C2H6O3/c1-4-2-5-3/h3H,2H2,1H3	J41	5.79e-06	0.000649096	0.000558251	1.36143e-05	6.10727e-06
966	CH3OOH	48.0413	CH3O + OH	COO	InChI=1S/CH4O2/c1-3-2/h2H,1H3	J41	5.79e-06	0.000649096	0.000558251	1.36143e-05	6.10727e-06
967	CH3SCH2OOH	94.1328	CH3SCH2O + OH	CSCOO	InChI=1S/C2H6O2S/c1-5-2-4-3/h3H,2H2,1H3	J41	5.79e-06	0.000649096	0.000558251	1.36143e-05	6.10727e-06
968	CH3SCHO	76.1176	CH3S + CO + HO2	CSC=O	InChI=1S/C2H4OS/c1-4-2-3/h2H,1H3	J15	1.99e-05	0.00223092	0.000584	0.000207	6.38896e-06
969	CH3SO2CHO	108.116	CH3SO2 + CO + HO2	O=CS(=O)(=O)C	InChI=1S/C2H4O3S/c1-6(4,5)2-3/h2H,1H3	J15	1.99e-05	0.00223092	0.000584	0.000207	6.38896e-06
970	CH3SO2OOH	112.105	CH3SO3 + OH	OOS(=O)(=O)C	InChI=1S/CH4O4S/c1-6(3,4)5-2/h2H,1H3	J41	5.79e-06	0.000649096	0.000558251	1.36143e-05	6.10727e-06
971	CH3SOOOH	96.1057	CH3SO2 + OH	CS(=O)OO	InChI=1S/CH4O3S/c1-5(3)4-2/h2H,1H3	J41	5.79e-06	0.000649096	0	NaN	0
972	CHCL2CHO	112.943	CHCL2O2 + HO2 + CO	O=CC(Cl)Cl	InChI=1S/C2H2Cl2O/c3-2(4)1-5/h1-2H	J17	5.5e-05	0.00616586	0.000584	0.000207	6.38896e-06
973	CHCL2CO3H	144.941	CHCL2O2 + OH	OOC(=O)C(Cl)Cl	InChI=1S/C2H2Cl2O3/c3-1(4)2(5)7-6/h1,6H	J41	5.79e-06	0.000649096	8.5369e-05	NaN	9.33937e-07
974	CHCL2COCL	147.388	CHCL2O2 + CO + CL	ClC(=O)C(Cl)Cl	InChI=1S/C2HCl3O/c3-1(4)2(5)6/h1H	J22	3.98e-06	0.000446184	0.000288	0.000185347	3.15072e-06
975	CHCL2COOH	130.958	CHCL2CH2O + OH	OOCC(Cl)Cl	InChI=1S/C2H4Cl2O2/c3-2(4)1-6-5/h2,5H,1H2	J41	5.79e-06	0.000649096	0.000558251	1.36143e-05	6.10727e-06
976	CHCL2OOH	116.931	CHCL2O + OH	OOC(Cl)Cl	InChI=1S/CH2Cl2O2/c2-1(3)5-4/h1,4H	J41	5.79e-06	0.000649096	0.000558251	1.36143e-05	6.10727e-06
977	CHCL3OOH	165.403	CHCL3O + OH	OOC(Cl)C(Cl)Cl	InChI=1S/C2H3Cl3O2/c3-1(4)2(5)7-6/h1-2,6H	J41	5.79e-06	0.000649096	0.000558251	1.36143e-05	6.10727e-06
978	CHEXNO3	145.156	CHEXO + NO2	O=N(=O)OC1CCCCC1	InChI=1S/C6H11NO3/c8-7(9)10-6-4-2-1-3-5-6/h6H,1-5H2	J54	2.99e-06	0.000335198	6.8088e-05	3.23144e-05	7.44882e-07
979	CHEXOOH	116.158	CHEXO + OH	OOC1CCCCC1	InChI=1S/C6H12O2/c7-8-6-4-2-1-3-5-6/h6-7H,1-5H2	J41	5.79e-06	0.000649096	0.000558251	1.36143e-05	6.10727e-06
980	CHOBR	108.922	HO2 + CO + BR	BrC=O	InChI=1S/CHBrO/c2-1-3/h1H	J11	3.26e-05	0.00365467	0.00854	0.000486	9.34276e-05
981	CHOC2CO3H	118.088	CHOC2H4O2 + OH+ CHOC2H4O2 + OH	OOC(=O)CCC=O	InChI=1S/C4H6O4/c5-3-1-2-4(6)8-7/h3,7H,1-2H2	J41+J15	2.569e-05	0.00288002	0.00196537	0.000113	2.15011e-05
982	CHOC2H4OOH	90.0779	CHOC2H4O + OH+ CHOC2H4O + OH	OOCCC=O	InChI=1S/C3H6O3/c4-2-1-3-6-5/h2,5H,1,3H2	J41+J15	2.569e-05	0.00288002	0.00296825	0.00231004	3.24727e-05
983	CHOC3COOOH	146.098	CHOC3COO2 + OH+ CHOC3COO2 + OH+ CHOC3COO2 + OH	OOC(=O)CC(=O)CC=O	InChI=1S/C5H6O5/c6-2-1-4(7)3-5(8)10-9/h2,9H,1,3H2	J41+J22+J15	2.967e-05	0.0033262	0.00192937	7.1487e-05	2.11073e-05
984	CHOC3DIOL	104.105	C3DIOLO2 + HO2 + CO	OC(CC=O)CO	InChI=1S/C4H8O3/c5-2-1-4(7)3-6/h2,4,6-7H,1,3H2	J15	1.99e-05	0.00223092	0.00188	0.000113	2.05672e-05
985	CHOC4CO3H	146.141	CHOC4O2 + OH+ CHOC4O2 + OH	O=CCCCCC(=O)OO	InChI=1S/C6H10O4/c7-5-3-1-2-4-6(8)10-9/h5,9H,1-4H2	J41+J15	2.569e-05	0.00288002	0.00229537	5.72e-06	2.51113e-05
986	CHOC4OHOOH	134.131	CHOC4OHO + OH+ CHOC4OHO + OH	OOCC(O)CCC=O	InChI=1S/C5H10O4/c6-3-1-2-5(7)4-9-8/h3,5,7-8H,1-2,4H2	J41+J15	2.569e-05	0.00288002	0.00218754	1.42682e-05	2.39317e-05
987	CHOC4OOH	118.131	CHOC4O + OH+ CHOC4O + OH	OOCCCCC=O	InChI=1S/C5H10O3/c6-4-2-1-3-5-8-7/h4,7H,1-3,5H2	J41+J15	2.569e-05	0.00288002	0.00220825	1.42682e-05	2.41583e-05
988	CHOCL	64.471	HO2 + CO + CL	ClC=O	InChI=1S/CHClO/c2-1-3/h1H	J11	3.26e-05	0.00365467	0.00854	0.000486	9.34276e-05
989	CHOMOHCO3H	134.087	MGLYOX + OH + HO2+ MGLYOX + OH + HO2	CC(O)(C=O)C(=O)OO	InChI=1S/C4H6O5/c1-4(7,2-5)3(6)9-8/h2,7-8H,1H3	J41+J17	6.079e-05	0.00681495	0.002332	0.000117591	2.55121e-05
990	CHOOCH2NO3	121.049	CHOOCH2O + NO2	O=COCON(=O)=O	InChI=1S/C2H3NO5/c4-1-7-2-8-3(5)6/h1H,2H2	J53	1.79e-06	0.000200671	0.0150088	NaN	0.000164196
991	CHOOCH2OOH	92.0508	CHOOCH2O + OH	OOCOC=O	InChI=1S/C2H4O4/c3-1-5-2-6-4/h1,4H,2H2	J41	5.79e-06	0.000649096	0.000558251	1.36143e-05	6.10727e-06
992	CHOOMCO3H	120.061	CHOOCH2O2 + OH	OOC(=O)COC=O	InChI=1S/C3H4O5/c4-2-7-1-3(5)8-6/h2,6H,1H2	J41	5.79e-06	0.000649096	8.5369e-05	NaN	9.33937e-07
993	CHOPRNO3	119.076	PROPALO + NO2	O=CC(C)ON(=O)=O	InChI=1S/C3H5NO4/c1-3(2-5)8-4(6)7/h2-3H,1H3	J56.*10	0.000316	0.0354256	0.0129081	0.00155763	0.000141215
994	CL12CO3H	158.968	DICLETO2 + OH	OOC(=O)C(Cl)CCl	InChI=1S/C3H4Cl2O3/c4-1-2(5)3(6)8-7/h2,7H,1H2	J41	5.79e-06	0.000649096	8.5369e-05	NaN	9.33937e-07
995	CL12PRAOOH	144.984	CL12PRAO + OH	OOCC(Cl)CCl	InChI=1S/C3H6Cl2O2/c4-1-3(5)2-7-6/h3,6H,1-2H2	J41	5.79e-06	0.000649096	0.000558251	1.36143e-05	6.10727e-06
996	CL12PRBOOH	144.984	CL12PRBO + OH	CC(Cl)(CCl)OO	InChI=1S/C3H6Cl2O2/c1-3(5,2-4)7-6/h6H,2H2,1H3	J41	5.79e-06	0.000649096	0.000558251	1.36143e-05	6.10727e-06
997	CL12PRCHO	126.969	DICLETO2 + HO2 + CO	ClC(CCl)C=O	InChI=1S/C3H4Cl2O/c4-1-3(5)2-6/h2-3H,1H2	J17	5.5e-05	0.00616586	0.00241	0.00231	2.63654e-05
998	CL12PRCOOH	144.984	CL12PRCO + OH	CC(Cl)C(Cl)OO	InChI=1S/C3H6Cl2O2/c1-2(4)3(5)7-6/h2-3,6H,1H3	J41	5.79e-06	0.000649096	0.000558251	1.36143e-05	6.10727e-06
999	CL1GLYOX	92.4811	CO + CO + HO2 + CL	O=CC(=O)Cl	InChI=1S/C2HClO2/c3-2(5)1-4/h1H	J34	0.000125	0.0140133	0.000872	0.000277853	9.53968e-06
1000	CL2OHCHO	128.942	COCL2 + HO2 + HO2 + CO	O=CC(O)(Cl)Cl	InChI=1S/C2H2Cl2O2/c3-2(4,6)1-5/h1,6H	J17	5.5e-05	0.00616586	0.000584	0.000207	6.38896e-06
1001	CL2OHCO3H	160.941	COCL2 + HO2 + OH	OOC(=O)C(O)(Cl)Cl	InChI=1S/C2H2Cl2O4/c3-2(4,6)1(5)8-7/h6-7H	J41	5.79e-06	0.000649096	8.5369e-05	NaN	9.33937e-07
1002	CL2OHOOH	146.957	CL2OHCH2O + OH	OOCC(O)(Cl)Cl	InChI=1S/C2H4Cl2O3/c3-2(4,5)1-7-6/h5-6H,1H2	J41	5.79e-06	0.000649096	0.00053754	1.36143e-05	5.88069e-06
1003	CLCOCH2OOH	110.496	CLCOCH2O + OH	OOCC(=O)Cl	InChI=1S/C2H3ClO3/c3-2(4)1-6-5/h5H,1H2	J41	5.79e-06	0.000649096	0.000846251	0.000185846	9.25799e-06
1004	CLCOCL2OOH	179.387	CLCOCCL2O + OH	OOC(Cl)(Cl)C(=O)Cl	InChI=1S/C2HCl3O3/c3-1(6)2(4,5)8-7/h7H	J41	5.79e-06	0.000649096	0.000846251	0.000185846	9.25799e-06
1005	CLCOCLMOOH	158.968	CLCOCLMEO + OH	CC(Cl)(OO)C(=O)Cl	InChI=1S/C3H4Cl2O3/c1-3(5,8-7)2(4)6/h7H,1H3	J41	5.79e-06	0.000649096	0.000630851	2.61748e-05	6.90151e-06
1006	CLCOCLOOH	144.941	CLCOCLO + OH	OOC(Cl)C(=O)Cl	InChI=1S/C2H2Cl2O3/c3-1(5)2(4)7-6/h2,6H	J41	5.79e-06	0.000649096	0.000846251	0.000185846	9.25799e-06
1007	CLETAL	78.4976	CH2CLO2 + HO2 + CO	ClCC=O	InChI=1S/C2H3ClO/c3-1-2-4/h2H,1H2	J11	3.26e-05	0.00365467	0.000584	0.000207	6.38896e-06
1008	CLETO3H	110.496	CH2CLO2 + OH	OOC(=O)CCl	InChI=1S/C2H3ClO3/c3-1-2(4)6-5/h5H,1H2	J41	5.79e-06	0.000649096	8.5369e-05	NaN	9.33937e-07
1009	CLGLYOX	126.926	CO + CO + CL + CL	ClC(=O)C(=O)Cl	InChI=1S/C2Cl2O2/c3-1(5)2(4)6	J15.*2	3.98e-05	0.00446184	0.0286089	0.00762411	0.000312982
1010	CLOHCO3H	126.496	CHOCL + HO2+ OH	OOC(=O)C(O)Cl	InChI=1S/C2H3ClO4/c3-1(4)2(5)7-6/h1,4,6H	J41	5.79e-06	0.000649096	8.5369e-05	NaN	9.33937e-07
1011	CNO3CLOOH	157.51	CNO3CLO + OH	OOC(Cl)CON(=O)=O	InChI=1S/C2H4ClNO5/c3-2(9-7)1-8-4(5)6/h2,7H,1H2	J41	5.79e-06	0.000649096	0.000713213	4.35803e-05	7.80255e-06
1012	CNO3OCL	139.495	CHCLOHCO + NO2+ HCHO + NO2 + CO + CL	ClC(=O)CON(=O)=O	InChI=1S/C2H2ClNO4/c3-2(5)1-8-4(6)7/h1H2	J53+J15	2.169e-05	0.00243159	0.00465	NaN	5.0871e-05
1013	CO123C5CHO	142.109	CHOC2CO3 + HO2 + CO + CO+ CHOC2CO3 + HO2 + CO + CO+ CHOC2CO3 + HO2 + CO + CO	O=CCCC(=O)C(=O)C=O	InChI=1S/C6H6O4/c7-3-1-2-5(9)6(10)4-8/h3-4H,1-2H2	J34+J15+J35	0.0004129	0.0462888	0.0330289	0.00762411	0.000361337
1014	CO12C4CHO	114.099	CHOC2CO3 + HO2 + CO+ CHOC2CO3 + HO2 + CO	O=CCCC(=O)C=O	InChI=1S/C5H6O3/c6-3-1-2-5(8)4-7/h3-4H,1-2H2	J34+J15	0.0001449	0.0162442	0.0158587	0.00046025	0.000173495
1015	CO13C3CO2H	116.072	HCOCH2CO3 + HO2+ HCOCH2CO3 + HO2	O=CCC(=O)C(=O)O	InChI=1S/C4H4O4/c5-2-1-3(6)4(7)8/h2H,1H2,(H,7,8)	J34+J15	0.0001449	0.0162442	0.02048	0.0160004	0.000224051
1016	CO13C4CHO	114.099	CHOC3COO2 + CO + HO2	O=CCC(=O)CC=O	InChI=1S/C5H6O3/c6-3-1-5(8)2-4-7/h3-4H,1-2H2	J15.*2	3.98e-05	0.00446184	0.003494	7.16145e-05	3.82244e-05
1017	CO13C4OH	102.089	HCOCH2O2 + HOCH2CO3+ MGLYOX + HO2 + HO2 + CO	OCC(=O)CC=O	InChI=1S/C4H6O3/c5-2-1-4(7)3-6/h2,6H,1,3H2	J22+J15	2.388e-05	0.0026771	0.002332	0.000117591	2.55121e-05
1018	CO14O3CHO	116.072	HO2 + CO + HCOCH2O2	O=CCOC(=O)C=O	InChI=1S/C4H4O4/c5-1-2-8-4(7)3-6/h1,3H,2H2	J34	0.000125	0.0140133	0.0160887	0.000473899	0.000176011
1019	CO1C6NO3	161.156	CO1C6O + NO2+ CO1C6O + NO2	O=CCCCCCON(=O)=O	InChI=1S/C6H11NO4/c8-5-3-1-2-4-6-11-7(9)10/h5H,1-4,6H2	J15+J53	2.169e-05	0.00243159	0.0150088	0.00133492	0.000164196
1020	CO1C6OOH	132.158	CO1C6O + OH+ CO1C6O + OH	OOCCCCCC=O	InChI=1S/C6H12O3/c7-5-3-1-2-4-6-9-8/h5,8H,1-4,6H2	J41+J15	2.569e-05	0.00288002	0.00276825	1.47671e-05	3.02847e-05
1021	CO1H63NO3	177.155	CO1H63O + NO2+ CO1H63O + NO2	OCCCC(CC=O)ON(=O)=O	InChI=1S/C6H11NO5/c8-4-1-2-6(3-5-9)12-7(10)11/h5-6,8H,1-4H2	J54+J15	2.289e-05	0.00256612	0.0150088	0.00133492	0.000164196
1022	CO1H63OOH	148.157	CO1H63O + OH+ CO1H63O + OH	OCCCC(OO)CC=O	InChI=1S/C6H12O4/c7-4-1-2-6(10-9)3-5-8/h5-7,9H,1-4H2	J41+J15	2.569e-05	0.00288002	0.00274754	1.47671e-05	3.00581e-05
1023	CO1M22CHO	100.116	IBUTALCO2 + CO + HO2	O=CC(C)(C)C=O	InChI=1S/C5H8O2/c1-5(2,3-6)4-7/h3-4H,1-2H3	J15.*2	3.98e-05	0.00446184	0.0033	6.03869e-06	3.6102e-05
1024	CO1M22CO2H	116.115	IBUTALCO2 + HO2	O=CC(C)(C)C(=O)O	InChI=1S/C5H8O3/c1-5(2,3-6)4(7)8/h3H,1-2H3,(H,7,8)	J15	1.99e-05	0.00223092	0.00165	4.27e-06	1.8051e-05
1025	CO1M22CO3H	132.115	IBUTALCO2 + OH+ IBUTALCO2 + OH	OOC(=O)C(C)(C)C=O	InChI=1S/C5H8O4/c1-5(2,3-6)4(7)9-8/h3,8H,1-2H3	J41+J15	2.569e-05	0.00288002	0.00173537	4.27e-06	1.89849e-05
1026	CO234C6	128.126	C2H5CO3 + CH3CO3 + CO	CCC(=O)C(=O)C(=O)C	InChI=1S/C6H8O3/c1-3-5(8)6(9)4(2)7/h3H2,1-2H3	J35.*2	0.000536	0.0600891	0.0290419	0.0076363	0.000317719
1027	CO234C6OOH	160.125	CO234C65O + OH+ CO234C65O + OH	CC(OO)C(=O)C(=O)C(=O)C	InChI=1S/C6H8O5/c1-3(7)5(8)6(9)4(2)11-10/h4,10H,1-2H3	J41+J35	0.00027379	0.0306936	0.0296002	0.00763631	0.000323826
1028	CO235C5CHO	142.109	CO23C4CO3 + CO + HO2	O=CC(=O)CC(=O)C(=O)C	InChI=1S/C6H6O4/c1-4(8)6(10)2-5(9)3-7/h3H,2H2,1H3	J34	0.000125	0.0140133	0.0312519	0.0076363	0.000341896
1029	CO235C6	128.126	CH3CO3 + CH3COCH2O2 + CO+ CH3CO3 + CO2C3CO3	CC(=O)CC(=O)C(=O)C	InChI=1S/C6H8O3/c1-4(7)3-6(9)5(2)8/h3H2,1-2H3	J22+J35	0.00027198	0.0304907	0.0290419	0.0076363	0.000317719
1030	CO235C6CHO	156.136	CHOC3COCO3 + CH3CO3	O=CCC(=O)CC(=O)C(=O)C	InChI=1S/C7H8O4/c1-5(9)7(11)4-6(10)2-3-8/h3H,2,4H2,1H3	J35	0.000268	0.0300445	0.0299369	0.00762817	0.00032751
1031	CO235C6OOH	160.125	CO235C6O + OH+ CO235C6O + OH	CC(=O)C(=O)CC(=O)COO	InChI=1S/C6H8O5/c1-4(7)6(9)2-5(8)3-11-10/h10H,2-3H2,1H3	J41+J35	0.00027379	0.0306936	0.0296002	0.00763631	0.000323826
1032	CO235C7	142.153	CH3CO3 + CO3C4CO3	CCC(=O)CC(=O)C(=O)C	InChI=1S/C7H10O3/c1-3-6(9)4-7(10)5(2)8/h3-4H2,1-2H3	J35	0.000268	0.0300445	0.0288969	0.00762636	0.000316133
1033	CO23C3CHO	100.073	CH3CO3 + CO + CO + HO2+ CH3CO3 + HCOCO	O=CC(=O)C(=O)C	InChI=1S/C4H4O3/c1-3(6)4(7)2-5/h2H,1H3	J34+J35	0.000393	0.0440578	0.0250979	0.0232182	0.000274571
1034	CO23C4CHO	114.099	BIACETO2 + HO2 + CO+ CH3CO3 + HCOCH2CO3	O=CCC(=O)C(=O)C	InChI=1S/C5H6O3/c1-4(7)5(8)2-3-6/h3H,2H2,1H3	J15+J35	0.0002879	0.0322755	0.03565	0.034	0.000390011
1035	CO23C4CO3H	146.098	BIACETO2 + OH+ BIACETO2 + OH	OOC(=O)CC(=O)C(=O)C	InChI=1S/C5H6O5/c1-3(6)4(7)2-5(8)10-9/h9H,2H2,1H3	J41+J15	2.569e-05	0.00288002	0.0340854	0.034	0.000372894
1036	CO23C4NO3	147.086	NO3CH2CO3 + CH3CO3	O=N(=O)OCC(=O)C(=O)C	InChI=1S/C4H5NO5/c1-3(6)4(7)2-10-5(8)9/h2H2,1H3	J35	0.000268	0.0300445	0.0234097	0.0232179	0.000256102
1037	CO23C5	100.116	CH3CO3 + C2H5CO3	CCC(=O)C(=O)C	InChI=1S/C5H8O2/c1-3-5(7)4(2)6/h3H2,1-2H3	J35	0.000268	0.0300445	0.034	0.034	0.00037196
1038	CO23C54OOH	132.115	CO23C54O + OH+ CO23C54O + OH	CC(OO)C(=O)C(=O)C	InChI=1S/C5H8O4/c1-3(6)5(7)4(2)9-8/h4,8H,1-2H3	J41+J35	0.00027379	0.0306936	0.0345583	0.034	0.000378067
1039	CO23C6	114.142	CH3CO3 + C3H7CO3	CCCC(=O)C(=O)C	InChI=1S/C6H10O2/c1-3-4-6(8)5(2)7/h3-4H2,1-2H3	J35	0.000268	0.0300445	0.0286089	0.00762411	0.000312982
1040	CO23C65OOH	146.141	CO23C65O + OH+ CO23C65O + OH	CC(CC(=O)C(=O)C)OO	InChI=1S/C6H10O4/c1-4(10-9)3-6(8)5(2)7/h4,9H,3H2,1-2H3	J35+J41	0.00027379	0.0306936	0.0291672	0.00762412	0.000319089
1041	CO245C7	142.153	C2H5CO3 + CO2C3CO3	CCC(=O)C(=O)CC(=O)C	InChI=1S/C7H10O3/c1-3-6(9)7(10)4-5(2)8/h3-4H2,1-2H3	J35	0.000268	0.0300445	0.0288969	0.00762636	0.000316133
1042	CO24C4CHO	114.099	CO2C3CO3 + CO + HO2	O=CC(=O)CC(=O)C	InChI=1S/C5H6O3/c1-4(7)2-5(8)3-6/h3H,2H2,1H3	J34	0.000125	0.0140133	0.002038	0.000101008	2.22957e-05
1043	CO24C5	100.116	CH3COCH2O2 + CH3CO3	CC(=O)CC(=O)C	InChI=1S/C5H8O2/c1-4(6)3-5(2)7/h3H2,1-2H3	J22	3.98e-06	0.000446184	0.000388	0.000100917	4.24472e-06
1044	CO24C53OOH	132.115	CO24C53O + OH+ MGLYOX + CH3CO3 + OH	OOC(C(=O)C)C(=O)C	InChI=1S/C5H8O4/c1-3(6)5(9-8)4(2)7/h5,8H,1-2H3	J41+J22	9.77e-06	0.00109528	0.000946251	0.000101832	1.0352e-05
1045	CO24C6	114.142	CH3CO3 + MEKCO2+ CH3COCH2O2 + C2H5CO3	CCC(=O)CC(=O)C	InChI=1S/C6H10O2/c1-3-6(8)4-5(2)7/h3-4H2,1-2H3	J22+J22	7.96e-06	0.000892368	0.000866	0.000610092	9.47404e-06
1046	CO24C63OOH	146.141	CO24C63O + OH+ MGLYOX + C2H5CO3 + OH	OOC(C(=O)C)C(=O)CC	InChI=1S/C6H10O4/c1-3-5(8)6(10-9)4(2)7/h6,9H,3H2,1-2H3	J41+J22.*2	1.375e-05	0.00154146	0.00142425	0.000610244	1.55813e-05
1047	CO24C6OOH	146.141	CH3CHO + CO2C3CO3+ CO24C6O + OH+ CO24C6O + OH	CC(OO)C(=O)CC(=O)C	InChI=1S/C6H10O4/c1-4(7)3-6(8)5(2)10-9/h5,9H,3H2,1-2H3	J22+J22+J41	1.375e-05	0.00154146	0.00142425	0.000610244	1.55813e-05
1048	CO24M3C5	114.142	MEKBO2 + CH3CO3	CC(=O)C(C)C(=O)C	InChI=1S/C6H10O2/c1-4(5(2)7)6(3)8/h4H,1-3H3	J22	3.98e-06	0.000446184	0.000866	0.000610092	9.47404e-06
1049	CO24M3C5OH	130.142	HOCH2CO3 + MEKBO2	CC(C(=O)CO)C(=O)C	InChI=1S/C6H10O3/c1-4(5(2)8)6(9)3-7/h4,7H,3H2,1-2H3	J22.*2	7.96e-06	0.000892368	0.000866	0.000610092	9.47404e-06
1050	CO24M3CHO	128.126	C41CO3 + HO2 + CO	O=CC(=O)C(C)C(=O)C	InChI=1S/C6H8O3/c1-4(5(2)8)6(9)3-7/h3-4H,1-2H3	J34	0.000125	0.0140133	0.003076	0.000610119	3.36514e-05
1051	CO25C6	114.142	CH3CO3 + MEKAO2	CC(=O)CCC(=O)C	InChI=1S/C6H10O2/c1-5(7)3-4-6(2)8/h3-4H2,1-2H3	J22.*2	7.96e-06	0.000892368	0.000866	0.000610092	9.47404e-06
1052	CO25C6CHO	142.153	C627O2 + CO + HO2	O=CCC(=O)CCC(=O)C	InChI=1S/C7H10O3/c1-6(9)2-3-7(10)4-5-8/h5H,2-4H2,1H3	J15	1.99e-05	0.00223092	0.001616	0.000310263	1.7679e-05
1053	CO25C6CO2H	158.152	C627O2 + HO2	CC(=O)CCC(=O)CC(=O)O	InChI=1S/C7H10O4/c1-5(8)2-3-6(9)4-7(10)11/h2-4H2,1H3,(H,10,11)	J22.*2	7.96e-06	0.000892368	0.000576	0.00026212	6.30144e-06
1054	CO25C6CO3H	174.151	C627O2 + OH+ C627O2 + OH	OOC(=O)CC(=O)CCC(=O)C	InChI=1S/C7H10O5/c1-5(8)2-3-6(9)4-7(10)12-11/h11H,2-4H2,1H3	J41+J22.*2	1.375e-05	0.00154146	0.000661369	0.00026212	7.23538e-06
1055	CO25C6OH	130.142	CH3CO3 + CO2C3CHO + HO2	CC(=O)CC(O)C(=O)C	InChI=1S/C6H10O3/c1-4(7)3-6(9)5(2)8/h6,9H,3H2,1-2H3	J22.*2	7.96e-06	0.000892368	0.000866	0.000610092	9.47404e-06
1056	CO25C6OOH	146.141	CH3CO3 + CO2C3CHO + OH+ CO25C6O + OH	OOC(CC(=O)C)C(=O)C	InChI=1S/C6H10O4/c1-4(7)3-6(10-9)5(2)8/h6,9H,3H2,1-2H3	J22.*2+J41	1.375e-05	0.00154146	0.00142425	0.000610244	1.55813e-05
1057	CO25C7	128.169	C2H5CO3 + MEKAO2+ CH3CO3 + DIEKBO2	CCC(=O)CCC(=O)C	InChI=1S/C7H12O2/c1-3-7(9)5-4-6(2)8/h3-5H2,1-2H3	J22+J22	7.96e-06	0.000892368	0.000576	0.00026212	6.30144e-06
1058	CO25C73OH	144.168	CH3CO3 + CO3C4CHO + HO2	CCC(=O)CC(O)C(=O)C	InChI=1S/C7H12O3/c1-3-6(9)4-7(10)5(2)8/h7,10H,3-4H2,1-2H3	J22.*2	7.96e-06	0.000892368	0.000576	0.00026212	6.30144e-06
1059	CO25C73OOH	160.168	CH3CO3 + CO3C4CHO + OH+ CO25C73O + OH	OOC(CC(=O)CC)C(=O)C	InChI=1S/C7H12O4/c1-3-6(9)4-7(11-10)5(2)8/h7,10H,3-4H2,1-2H3	J22.*2+J41	1.375e-05	0.00154146	0.00113425	0.000262474	1.24087e-05
1060	CO25C74OH	144.168	C2H5CO3 + CO2C3CHO + HO2	CCC(=O)C(O)CC(=O)C	InChI=1S/C7H12O3/c1-3-6(9)7(10)4-5(2)8/h7,10H,3-4H2,1-2H3	J22.*2	7.96e-06	0.000892368	0.000576	0.00026212	6.30144e-06
1061	CO25C74OOH	160.168	C2H5CO3 + CO2C3CHO + OH+ CO25C74O + OH	OOC(CC(=O)C)C(=O)CC	InChI=1S/C7H12O4/c1-3-6(9)7(11-10)4-5(2)8/h7,10H,3-4H2,1-2H3	J22.*2+J41	1.375e-05	0.00154146	0.00113425	0.000262474	1.24087e-05
1062	CO2C3CHO	86.0892	CH3COCH2O2 + HCHO	O=CCC(=O)C	InChI=1S/C4H6O2/c1-4(6)2-3-5/h3H,2H2,1H3	J15	1.99e-05	0.00223092	0.002332	0.000117591	2.55121e-05
1063	CO2C3CO3H	118.088	CH3COCH2O2 + OH+ CH3COCH2O2 + OH	CC(=O)CC(=O)OO	InChI=1S/C4H6O4/c1-3(5)2-4(6)8-7/h7H,2H2,1H3	J41+J22	9.77e-06	0.00109528	0.000537369	3.25375e-05	5.87882e-06
1064	CO2C43CHO	100.116	MEKBO2 + HO2 + CO	O=CC(C)C(=O)C	InChI=1S/C5H8O2/c1-4(3-6)5(2)7/h3-4H,1-2H3	J17	5.5e-05	0.00616586	0.001844	7.1487e-05	2.01734e-05
1065	CO2C4CHO	100.116	MEKAO2 + HO2 + CO	O=CCCC(=O)C	InChI=1S/C5H8O2/c1-5(7)3-2-4-6/h4H,2-3H2,1H3	J15	1.99e-05	0.00223092	0.001844	7.1487e-05	2.01734e-05
1066	CO2C4CO3H	132.115	MEKAO2 + OH+ MEKAO2 + OH	CC(=O)CCC(=O)OO	InChI=1S/C5H8O4/c1-4(6)2-3-5(7)9-8/h8H,2-3H2,1H3	J41+J22	9.77e-06	0.00109528	0.000279369	7.13594e-05	3.0563e-06
1067	CO2C4DIAL	114.056	CO + CO + HO2 + HO2 + CO + CO	O=CC(=O)C(=O)C=O	InChI=1S/C4H2O4/c5-1-3(7)4(8)2-6/h1-2H	J34.*2	0.00025	0.0280266	0.0269779	0.0232184	0.000295138
1068	CO2C4GLYOX	128.126	CO2C4CO3 + CO + HO2	O=CC(=O)CCC(=O)C	InChI=1S/C6H8O3/c1-5(8)2-3-6(9)4-7/h4H,2-3H2,1H3	J34	0.000125	0.0140133	0.003076	0.000610119	3.36514e-05
1069	CO2C54CHO	114.142	CO2C54O2 + HO2 + CO	O=CC(C)CC(=O)C	InChI=1S/C6H10O2/c1-5(4-7)3-6(2)8/h4-5H,3H2,1-2H3	J17	5.5e-05	0.00616586	0.002643	0.000431438	2.89144e-05
1070	CO2C54CO3H	146.141	CO2C54O2 + OH	CC(CC(=O)C)C(=O)OO	InChI=1S/C6H10O4/c1-4(3-5(2)7)6(8)10-9/h4,9H,3H2,1-2H3	J41	5.79e-06	0.000649096	0.000518369	0.0004314	5.67096e-06
1071	CO2C5OH	102.132	CH3CO3 + HO1C3O2	OCCCC(=O)C	InChI=1S/C5H10O2/c1-5(7)3-2-4-6/h6H,2-4H2,1H3	J22	3.98e-06	0.000446184	0.000194	7.13594e-05	2.12236e-06
1072	CO2H3CHO	102.089	MGLYOX + CO + HO2 + HO2	O=CC(O)C(=O)C	InChI=1S/C4H6O3/c1-3(6)4(7)2-5/h2,4,7H,1H3	J15	1.99e-05	0.00223092	0.002332	0.000117591	2.55121e-05
1073	CO2H3CO3H	134.087	CH3CO3 + HO2 + HCOCO3H+ MGLYOX + HO2 + OH	CC(=O)C(O)C(=O)OO	InChI=1S/C4H6O5/c1-2(5)3(6)4(7)9-8/h3,6,8H,1H3	J22+J41	9.77e-06	0.00109528	0.000537369	3.25375e-05	5.87882e-06
1074	CO2H3MCO3H	148.114	BIACET + HO2 + OH	CC(O)(C(=O)OO)C(=O)C	InChI=1S/C5H8O5/c1-3(6)5(2,8)4(7)10-9/h8-9H,1-2H3	J41	5.79e-06	0.000649096	0.000388	0.000100917	4.24472e-06
1075	CO2HO3C6	116.158	CH3CO3 + C3H7CHO	CCCC(O)C(=O)C	InChI=1S/C6H12O2/c1-3-4-6(8)5(2)7/h6,8H,3-4H2,1-2H3	J22	3.98e-06	0.000446184	0.000433	0.0004314	4.73702e-06
1076	CO2HO4C6	116.158	CH3CO3 + HO3C4O2	CCC(O)CC(=O)C	InChI=1S/C6H12O2/c1-3-6(8)4-5(2)7/h6,8H,3-4H2,1-2H3	J22	3.98e-06	0.000446184	0.000433	0.0004314	4.73702e-06
1077	CO2HOC6OOH	148.157	CO2HOC61O + OH+ CO2HOC61O + OH	CCC(O)CC(=O)COO	InChI=1S/C6H12O4/c1-2-5(7)3-6(8)4-10-9/h5,7,9H,2-4H2,1H3	J41+J22	9.77e-06	0.00109528	0.00097054	0.000431615	1.06177e-05
1078	CO2M33CHO	114.142	MIPKBO2 + HO2 + CO	O=CC(C)(C)C(=O)C	InChI=1S/C6H10O2/c1-5(8)6(2,3)4-7/h4H,1-3H3	J17	5.5e-05	0.00616586	0.002643	0.000431438	2.89144e-05
1079	CO2M33CO3H	146.141	MIPKAO2 + OH	OOC(=O)C(C)(C)C(=O)C	InChI=1S/C6H10O4/c1-4(7)6(2,3)5(8)10-9/h9H,1-3H3	J41	5.79e-06	0.000649096	0.000518369	0.0004314	5.67096e-06
1080	CO2M3C4CHO	114.142	MIPKBO2 + HO2 + CO	O=CCC(C)C(=O)C	InChI=1S/C6H10O2/c1-5(3-4-7)6(2)8/h4-5H,3H2,1-2H3	J15	1.99e-05	0.00223092	0.002643	0.000431438	2.89144e-05
1081	CO2M3C5OH	116.158	CH3CO3 + NBUTOLBO2	CC(CCO)C(=O)C	InChI=1S/C6H12O2/c1-5(3-4-7)6(2)8/h5,7H,3-4H2,1-2H3	J22	3.98e-06	0.000446184	0.000433	0.0004314	4.73702e-06
1082	CO2MC5OH	116.158	CH3CO3 + IBUTOLCO2	CC(CC(=O)C)CO	InChI=1S/C6H12O2/c1-5(4-7)3-6(2)8/h5,7H,3-4H2,1-2H3	J22	3.98e-06	0.000446184	0.000433	0.0004314	4.73702e-06
1083	CO2N3CHO	147.086	GLYOX + CH3CO3 + NO2	O=CC(ON(=O)=O)C(=O)C	InChI=1S/C4H5NO5/c1-3(7)4(2-6)10-5(8)9/h2,4H,1H3	J56.*10	0.000316	0.0354256	0.00636667	0.00222946	6.96513e-05
1084	CO2N3CO3H	179.085	MGLYOX + NO2 + OH	OOC(=O)C(ON(=O)=O)C(=O)C	InChI=1S/C4H5NO7/c1-2(6)3(4(7)12-10)11-5(8)9/h3,10H,1H3	J41	5.79e-06	0.000649096	0.00457204	0.0022266	5.00181e-05
1085	CO2N3PAN	224.083	CO2N3CO3 + NO2	O=N(=O)OOC(=O)C(ON(=O)=O)C(=O)C	InChI=1S/C4H4N2O9/c1-2(7)3(13-5(9)10)4(8)14-15-6(11)12/h3H,1H3	J56.*10	0.000316	0.0354256	0.00460088	0.00222697	5.03336e-05
1086	CO346C8	156.179	C2H5CO3 + CO3C4CO3+ C2H5CO3 + CO3C4CO3	CCC(=O)CC(=O)C(=O)CC	InChI=1S/C8H12O3/c1-3-6(9)5-8(11)7(10)4-2/h3-5H2,1-2H3	J35+J22	0.00027198	0.0304907	0.0288969	0.00762636	0.000316133
1087	CO356C10	184.232	C4H9CO3 + CO3C4CO3+ C4H9CO3 + CO3C4CO3	CCCCC(=O)C(=O)CC(=O)CC	InChI=1S/C10H16O3/c1-3-5-6-9(12)10(13)7-8(11)4-2/h3-7H2,1-2H3	J35+J22	0.00027198	0.0304907	0.0288969	0.00762636	0.000316133
1088	CO356C11	198.259	C5H11CO3 + CO3C4CO3+ C5H11CO3 + CO3C4CO3	CCCCCC(=O)C(=O)CC(=O)CC	InChI=1S/C11H18O3/c1-3-5-6-7-10(13)11(14)8-9(12)4-2/h3-8H2,1-2H3	J35+J22	0.00027198	0.0304907	0.0288969	0.00762636	0.000316133
1089	CO356C12	212.285	C6H13CO3 + CO3C4CO3+ C6H13CO3 + CO3C4CO3	CCCCCCC(=O)C(=O)CC(=O)CC	InChI=1S/C12H20O3/c1-3-5-6-7-8-11(14)12(15)9-10(13)4-2/h3-9H2,1-2H3	J35+J22	0.00027198	0.0304907	0.0288969	0.00847561	0.000316133
1090	CO356C9	170.206	C3H7CO3 + CO3C4CO3+ C3H7CO3 + CO3C4CO3	CCCC(=O)C(=O)CC(=O)CC	InChI=1S/C9H14O3/c1-3-5-8(11)9(12)6-7(10)4-2/h3-6H2,1-2H3	J35+J22	0.00027198	0.0304907	0.0288969	0.00762636	0.000316133
1091	CO356OCOOH	176.124	CO356OCO + OH	CC(OO)C(=O)OC(=O)C(=O)C	InChI=1S/C6H8O6/c1-3(7)5(8)11-6(9)4(2)12-10/h4,10H,1-2H3	J41	5.79e-06	0.000649096	0.0296002	0.00763631	0.000323826
1092	CO35C5CHO	128.126	HO2 + CO + CO + MEKCO2+ HO2 + CO + CO3C4CO3	CCC(=O)CC(=O)C=O	InChI=1S/C6H8O3/c1-2-5(8)3-6(9)4-7/h4H,2-3H2,1H3	J22+J34	0.00012898	0.0144595	0.0146417	0.000630807	0.000160181
1093	CO36C10	170.249	C4H9CO3 + DIEKBO2	CCCCC(=O)CCC(=O)CC	InChI=1S/C10H18O2/c1-3-5-6-10(12)8-7-9(11)4-2/h3-8H2,1-2H3	J22.*2	7.96e-06	0.000892368	0.000576	0.00026212	6.30144e-06
1094	CO36C11	184.275	C5H11CO3 + DIEKBO2	CCCCCC(=O)CCC(=O)CC	InChI=1S/C11H20O2/c1-3-5-6-7-11(13)9-8-10(12)4-2/h3-9H2,1-2H3	J22.*2	7.96e-06	0.000892368	0.000576	0.00026212	6.30144e-06
1095	CO36C12	198.302	C6H13CO3 + DIEKBO2	CCCCCCC(=O)CCC(=O)CC	InChI=1S/C12H22O2/c1-3-5-6-7-8-12(14)10-9-11(13)4-2/h3-10H2,1-2H3	J22.*2	7.96e-06	0.000892368	0.000576	0.00026212	6.30144e-06
1096	CO36C8	142.196	C2H5CO3 + DIEKBO2	CCC(=O)CCC(=O)CC	InChI=1S/C8H14O2/c1-3-7(9)5-6-8(10)4-2/h3-6H2,1-2H3	J22.*2	7.96e-06	0.000892368	0.000576	0.00026212	6.30144e-06
1097	CO36C9	156.222	C3H7CO3 + DIEKBO2	CCCC(=O)CCC(=O)CC	InChI=1S/C9H16O2/c1-3-5-9(11)7-6-8(10)4-2/h3-7H2,1-2H3	J22.*2	7.96e-06	0.000892368	0.000576	0.00026212	6.30144e-06
1098	CO3C4CHO	100.116	MEKCO2 + HO2 + CO	CCC(=O)CC=O	InChI=1S/C5H8O2/c1-2-5(7)3-4-6/h4H,2-3H2,1H3	J15	1.99e-05	0.00223092	0.001844	7.1487e-05	2.01734e-05
1099	CO3C4CO2H	116.115	MEKCO2 + HO2	CCC(=O)CC(=O)O	InChI=1S/C5H8O3/c1-2-4(6)3-5(7)8/h2-3H2,1H3,(H,7,8)	J22	3.98e-06	0.000446184	0.000194	7.13594e-05	2.12236e-06
1100	CO3C4CO3H	132.115	MEKCO2 + OH+ MEKCO2 + OH	CCC(=O)CC(=O)OO	InChI=1S/C5H8O4/c1-2-4(6)3-5(7)9-8/h8H,2-3H2,1H3	J41+J22	9.77e-06	0.00109528	0.000279369	7.13594e-05	3.0563e-06
1101	CO3C4NO3	133.103	MEKCO + NO2	CCC(=O)CON(=O)=O	InChI=1S/C4H7NO4/c1-2-4(6)3-9-5(7)8/h2-3H2,1H3	J56	3.16e-05	0.00354256	0.00448667	0.0022266	4.90841e-05
1102	CO3C4NO3OH	149.102	HO2CO3C4O + NO2	O=N(=O)OCC(=O)C(C)O	InChI=1S/C4H7NO5/c1-3(6)4(7)2-10-5(8)9/h3,6H,2H2,1H3	J56	3.16e-05	0.00354256	0.00448667	0.0022266	4.90841e-05
1103	CO3C54CHO	114.142	DIEKAO2 + HO2 + CO	CC(C=O)C(=O)CC	InChI=1S/C6H10O2/c1-3-6(8)5(2)4-7/h4-5H,3H2,1-2H3	J17	5.5e-05	0.00616586	0.003076	0.000610119	3.36514e-05
1104	CO3C54CO3H	146.141	DIEKAO2 + OH+ DIEKAO2 + OH	CCC(=O)C(C)C(=O)OO	InChI=1S/C6H10O4/c1-3-5(7)4(2)6(8)10-9/h4,9H,3H2,1-2H3	J41+J22	9.77e-06	0.00109528	0.000518369	0.0004314	5.67096e-06
1105	CO3C5CHO	114.142	DIEKBO2 + HO2 + CO	CCC(=O)CCC=O	InChI=1S/C6H10O2/c1-2-6(8)4-3-5-7/h5H,2-4H2,1H3	J15	1.99e-05	0.00223092	0.002643	0.000431438	2.89144e-05
1106	CO3C5CO2H	130.142	DIEKBO2 + HO2	CCC(=O)CCC(=O)O	InChI=1S/C6H10O3/c1-2-5(7)3-4-6(8)9/h2-4H2,1H3,(H,8,9)	J22	3.98e-06	0.000446184	0.000433	0.0004314	4.73702e-06
1107	CO3C5CO3H	146.141	DIEKBO2 + OH+ DIEKBO2 + OH	CCC(=O)CCC(=O)OO	InChI=1S/C6H10O4/c1-2-5(7)3-4-6(8)10-9/h9H,2-4H2,1H3	J41+J22	9.77e-06	0.00109528	0.000518369	0.0004314	5.67096e-06
1108	CO3C75OOH	146.184	CO3C75O + OH+ CO3C75O + OH	CCC(=O)CC(CC)OO	InChI=1S/C7H14O3/c1-3-6(8)5-7(4-2)10-9/h7,9H,3-5H2,1-2H3	J41+J22	9.77e-06	0.00109528	0.000846251	0.000185846	9.25799e-06
1109	CO3C85OOH	160.211	CO3C85O + OH+ CO3C85O + OH	CCCC(OO)CC(=O)CC	InChI=1S/C8H16O3/c1-3-5-8(11-10)6-7(9)4-2/h8,10H,3-6H2,1-2H3	J41+J22	9.77e-06	0.00109528	0.000846251	0.000185846	9.25799e-06
1110	CO3H4CHO	116.115	C2H5CO3 + GLYOX + HO2+ EGLYOX + HO2 + HO2 + CO	CCC(=O)C(O)C=O	InChI=1S/C5H8O3/c1-2-4(7)5(8)3-6/h3,5,8H,2H2,1H3	J22+J17	5.898e-05	0.00661204	0.001844	7.1487e-05	2.01734e-05
1111	CO3H4CO3H	148.114	C2H5CO3 + HCOCO3H + HO2+ EGLYOX + OH + HO2	CCC(=O)C(O)C(=O)OO	InChI=1S/C5H8O5/c1-2-3(6)4(7)5(8)10-9/h4,7,9H,2H2,1H3	J22+J41	9.77e-06	0.00109528	0.000279369	7.13594e-05	3.0563e-06
1112	CO45C5CHO	128.126	C3H7CO3 + CO + CO + HO2+ C3H7CO3 + CO + CO + HO2	CCCC(=O)C(=O)C=O	InChI=1S/C6H8O3/c1-2-3-5(8)6(9)4-7/h4H,2-3H2,1H3	J35+J34	0.000393	0.0440578	0.0308189	0.00762411	0.000337159
1113	CO4DBC8	168.147	C5DBCO2CO3 + CH3CO3+ C5DBCO2CO3 + CH3CO3	O=CC(=O)C(=CC(=O)C(=O)C)C	InChI=1S/C8H8O4/c1-5(8(12)4-9)3-7(11)6(2)10/h3-4H,1-2H3	J34+J35	0.000393	0.0440578	0.0307814	0.00764406	0.000336748
1114	CO4DBC9	182.173	C4DBM2CO3 + CH3CO3+ C4DBM2CO3 + CH3CO3	O=CC(=O)C(=C(C)C(=O)C(=O)C)C	InChI=1S/C9H10O4/c1-5(8(12)4-10)6(2)9(13)7(3)11/h4H,1-3H3	J34+J35	0.000393	0.0440578	0.0307814	0.00764406	0.000336748
1115	COC4NO3OOH	165.101	CO3C4NO3O + OH+ CO3C4NO3O + OH	OOC(C)C(=O)CON(=O)=O	InChI=1S/C4H7NO6/c1-3(11-9)4(6)2-10-5(7)8/h3,9H,2H2,1H3	J41+J53	7.58e-06	0.000849767	0.00504492	0.00222664	5.51914e-05
1116	COCCOHCOOH	120.104	CO + HO2 + OH + CH3CHOHCHO+ COCCOHCO + OH	OOC(C=O)C(C)O	InChI=1S/C4H8O4/c1-3(6)4(2-5)8-7/h2-4,6-7H,1H3	J17+J41	6.079e-05	0.00681495	0.00241754	0.000113817	2.64479e-05
1117	COCCOHNO3	149.102	CO + HO2 + NO2 + CH3CHOHCHO+ CO + HO2 + NO2 + CH3CHOHCHO	O=CC(ON(=O)=O)C(C)O	InChI=1S/C4H7NO5/c1-3(7)4(2-6)10-5(8)9/h2-4,7H,1H3	J17+J55	6.333e-05	0.0070997	0.0144816	0.00400026	0.000158429
1118	COCL2	98.9161	CO + CL + CL	ClC(=O)Cl	InChI=1S/CCl2O/c2-1(3)4	J15	1.99e-05	0.00223092	0.000288	0.000185347	3.15072e-06
1119	COHCCLOOH	112.512	CH2OHCCLO + OH	OCC(Cl)OO	InChI=1S/C2H5ClO3/c3-2(1-4)6-5/h2,4-5H,1H2	J41	5.79e-06	0.000649096	0.00053754	1.36143e-05	5.88069e-06
1120	COHM2CO2H	118.088	HCOCO2H + CO + HO2	O=CC(C)(O)C(=O)O	InChI=1S/C4H6O4/c1-4(8,2-5)3(6)7/h2,8H,1H3,(H,6,7)	J17	5.5e-05	0.00616586	0.00188	0.000113	2.05672e-05
1121	COHM2CO3H	134.087	GLYOX + HO2 + OH+ HCOCO3H + CO + HO2	CC(O)(C=O)C(=O)OO	InChI=1S/C4H6O5/c1-4(7,2-5)3(6)9-8/h2,7-8H,1H3	J41+J17	6.079e-05	0.00681495	0.002332	0.000117591	2.55121e-05
1122	COHM2PAN	179.085	COHM2CO3 + NO2	O=CC(C)(O)C(=O)OON(=O)=O	InChI=1S/C4H5NO7/c1-4(8,2-6)3(7)11-12-5(9)10/h2,8H,1H3	J17	5.5e-05	0.00616586	0.002332	0.000117591	2.55121e-05
1123	CONM2CHO	147.086	MGLYOX + NO2 + CO + HO2	O=CC(C)(C=O)ON(=O)=O	InChI=1S/C4H5NO5/c1-4(2-6,3-7)10-5(8)9/h2-3H,1H3	J56.*10	0.000316	0.0354256	0.0163616	0.00400186	0.000178996
1124	CONM2CO2H	163.086	CO + HO2 + NO2 + CH3COCO2H	O=CC(C)(ON(=O)=O)C(=O)O	InChI=1S/C4H5NO6/c1-4(2-6,3(7)8)11-5(9)10/h2H,1H3,(H,7,8)	J56.*10	0.000316	0.0354256	0.0144816	0.00400026	0.000158429
1125	CONM2CO3H	179.085	CO + HO2 + NO2 + CH3COCO3H	OOC(=O)C(C)(C=O)ON(=O)=O	InChI=1S/C4H5NO7/c1-4(2-6,3(7)11-10)12-5(8)9/h2,10H,1H3	J56.*10	0.000316	0.0354256	0.014567	0.00400026	0.000159363
1126	CONM2PAN	224.083	CONM2CO3 + NO2	O=CC(C)(ON(=O)=O)C(=O)OON(=O)=O	InChI=1S/C4H4N2O9/c1-4(2-7,14-5(9)10)3(8)13-15-6(11)12/h2H,1H3	J56.*10	0.000316	0.0354256	0.00636667	0.00222946	6.96513e-05
1127	CONO3C6OOH	193.155	C6CONO34O + OH+ C6CONO34O + OH	CCC(OO)C(ON(=O)=O)C(=O)C	InChI=1S/C6H11NO6/c1-3-5(13-11)6(4(2)8)12-7(9)10/h5-6,11H,3H2,1-2H3	J41+J56.*1.6	5.635e-05	0.0063172	0.00520825	0.000743159	5.69783e-05
1128	COO2C3CHO	102.089	MOCOCH2O2 + HO2 + CO	COC(=O)CC=O	InChI=1S/C4H6O3/c1-7-4(6)2-3-5/h3H,2H2,1H3	J15	1.99e-05	0.00223092	0.002332	0.000117591	2.55121e-05
1129	COO2C3CO3H	134.087	MOCOCH2O2 + OH	COC(=O)CC(=O)OO	InChI=1S/C4H6O5/c1-8-3(5)2-4(6)9-7/h7H,2H2,1H3	J41	5.79e-06	0.000649096	0.000537369	3.25375e-05	5.87882e-06
1130	COO2C4CHO	116.115	COO2C4O2 + HO2 + CO	COC(=O)CCC=O	InChI=1S/C5H8O3/c1-8-5(7)3-2-4-6/h4H,2-3H2,1H3	J15	1.99e-05	0.00223092	0.001844	7.1487e-05	2.01734e-05
1131	COO2C4CO3H	148.114	COO2C4O2 + OH	COC(=O)CCC(=O)OO	InChI=1S/C5H8O5/c1-9-4(6)2-3-5(7)10-8/h8H,2-3H2,1H3	J41	5.79e-06	0.000649096	0.000279369	7.13594e-05	3.0563e-06
1132	COO2C4OOH	120.104	COO2C4O + OH	OOCCC(=O)OC	InChI=1S/C4H8O4/c1-7-4(5)2-3-8-6/h6H,2-3H2,1H3	J41	5.79e-06	0.000649096	0.00101025	3.52709e-05	1.10521e-05
1133	CRESOOH	190.151	CRESO + OH	OOC1(O)C=CC2(C)OOC1C2O	InChI=1S/C7H10O6/c1-6-2-3-7(9,12-10)5(4(6)8)11-13-6/h2-5,8-10H,1H3	J41	5.79e-06	0.000649096	0.00107508	1.92535e-05	1.17614e-05
1134	CY6COCOOOH	144.125	CY6DIONO + OH	OOC1CC(=O)CC(=O)C1	InChI=1S/C6H8O4/c7-4-1-5(8)3-6(2-4)10-9/h6,9H,1-3H2	J41	5.79e-06	0.000649096	0.00142425	0.000610244	1.55813e-05
1135	CY6DIONOH	128.126	ACR + CO + VINOH	OC1CC(=O)CC(=O)C1	InChI=1S/C6H8O3/c7-4-1-5(8)3-6(9)2-4/h4,7H,1-3H2	J22	3.98e-06	0.000446184	0.000866	0.000610092	9.47404e-06
1136	CY6DIONOOH	144.125	CYC6DIONO + OH+ CYC6DIONO + OH	OOC1CCC(=O)C(=O)C1	InChI=1S/C6H8O4/c7-5-2-1-4(10-9)3-6(5)8/h4,9H,1-3H2	J41+J35	0.00027379	0.0306936	0.0291672	0.00762412	0.000319089
1137	CY6TRION	126.11	C3H6 + CO + CO + CO	O=C1CC(=O)CC(=O)C1	InChI=1S/C6H6O3/c7-4-1-5(8)3-6(9)2-4/h1-3H2	J22.*3	1.194e-05	0.00133855	0.00327884	0.000610092	3.58706e-05
1138	CYC613DION	112.126	ACR + CO + C2H4	O=C1CCCC(=O)C1	InChI=1S/C6H8O2/c7-5-2-1-3-6(8)4-5/h1-4H2	J22.*2	7.96e-06	0.000892368	0.00284584	0.0004314	3.11335e-05
1139	CYC6DIONE	112.126	C4H6 + CO + CO	O=C1CCCCC1=O	InChI=1S/C6H8O2/c7-5-3-1-2-4-6(5)8/h1-4H2	J22	3.98e-06	0.000446184	0.00482569	NaN	5.2793e-05
1140	CYHEXONE	98.143	C2H4 + C3H6 + CO+ PENT1ENE + CO	O=C1CCCCC1	InChI=1S/C6H10O/c7-6-4-2-1-3-5-6/h1-5H2	J22.*0.5+J22.*0.5	3.98e-06	0.000446184	0.00241284	NaN	2.63965e-05
1141	CYHXOLACO	114.142	C2H4 + CO + ALLYLOH	OC1CCCCC1=O	InChI=1S/C6H10O2/c7-5-3-1-2-4-6(5)8/h5,7H,1-4H2	J22	3.98e-06	0.000446184	0.00241284	NaN	2.63965e-05
1142	CYHXOLAOOH	132.158	CYHEXOLAO + OH	OOC1CCCCC1O	InChI=1S/C6H12O3/c7-5-3-1-2-4-6(5)9-8/h5-8H,1-4H2	J41	5.79e-06	0.000649096	0.00053754	1.36143e-05	5.88069e-06
1143	CYHXONANO3	159.14	CYHXONAO + NO2	O=C1CCCC(C1)ON(=O)=O	InChI=1S/C6H9NO4/c8-5-2-1-3-6(4-5)11-7(9)10/h6H,1-4H2	J54	2.99e-06	0.000335198	0.00248093	3.23144e-05	2.71414e-05
1144	CYHXONAOH	114.142	C3H6 + VINOH + OH	OC1CCCC(=O)C1	InChI=1S/C6H10O2/c7-5-2-1-3-6(8)4-5/h5,7H,1-4H2	J22	3.98e-06	0.000446184	0.00241284	NaN	2.63965e-05
1145	CYHXONAOOH	130.142	CYHXONAO + OH+ CYHXONAO + OH	OOC1CCCC(=O)C1	InChI=1S/C6H10O3/c7-5-2-1-3-6(4-5)9-8/h6,8H,1-4H2	J41+J22	9.77e-06	0.00109528	0.00297109	1.36143e-05	3.25038e-05
1146	DDEC3ONE	184.318	C2H5CO3 + NONO2	CCCCCCCCCC(=O)CC	InChI=1S/C12H24O/c1-3-5-6-7-8-9-10-11-12(13)4-2/h3-11H2,1-2H3	J22	3.98e-06	0.000446184	0.000288	0.000185347	3.15072e-06
1147	DDECNO3	231.332	DDECO + NO2	CCCCCCCCCC(CC)ON(=O)=O	InChI=1S/C12H25NO3/c1-3-5-6-7-8-9-10-11-12(4-2)16-13(14)15/h12H,3-11H2,1-2H3	J54	2.99e-06	0.000335198	0.00019272	3.23144e-05	2.10836e-06
1148	DDECOOH	202.334	DDECO + OH	CCCCCCCCCC(CC)OO	InChI=1S/C12H26O2/c1-3-5-6-7-8-9-10-11-12(4-2)14-13/h12-13H,3-11H2,1-2H3	J41	5.79e-06	0.000649096	0.000558251	1.36143e-05	6.10727e-06
1149	DE35TNO3	209.242	DE35TO + NO2	CCc1cc(C)cc(c1)C(C)ON(=O)=O	InChI=1S/C11H15NO3/c1-4-10-5-8(2)6-11(7-10)9(3)15-12(13)14/h5-7,9H,4H2,1-3H3	J54	2.99e-06	0.000335198	6.8088e-05	3.23144e-05	7.44882e-07
1150	DE35TOOH	180.244	DE35TO + OH	OOC(C)c1cc(CC)cc(C)c1	InChI=1S/C11H16O2/c1-4-10-5-8(2)6-11(7-10)9(3)13-12/h5-7,9,12H,4H2,1-3H3	J41	5.79e-06	0.000649096	0.000558251	1.36143e-05	6.10727e-06
1151	DEC3ONE	156.265	C2H5CO3 + HEPTO2	CCCCCCCC(=O)CC	InChI=1S/C10H20O/c1-3-5-6-7-8-9-10(11)4-2/h3-9H2,1-2H3	J22	3.98e-06	0.000446184	0.000288	0.000185347	3.15072e-06
1152	DECNO3	203.279	DECO + NO2	CCCCCCCC(CC)ON(=O)=O	InChI=1S/C10H21NO3/c1-3-5-6-7-8-9-10(4-2)14-11(12)13/h10H,3-9H2,1-2H3	J54	2.99e-06	0.000335198	0.00019272	3.23144e-05	2.10836e-06
1153	DECOOH	174.28	DECO + OH	CCCCCCCC(CC)OO	InChI=1S/C10H22O2/c1-3-5-6-7-8-9-10(4-2)12-11/h10-11H,3-9H2,1-2H3	J41	5.79e-06	0.000649096	0.000558251	1.36143e-05	6.10727e-06
1154	DEMPHOLOOH	246.257	DEMPHOLO + OH	CCC12OOC(CC)(C=C(C)C2(O)OO)C1O	InChI=1S/C11H18O6/c1-4-9-6-7(3)11(13,15-14)10(5-2,8(9)12)17-16-9/h6,8,12-14H,4-5H2,1-3H3	J41	5.79e-06	0.000649096	0.00053754	1.36143e-05	5.88069e-06
1155	DETLBIPNO3	259.256	DETLBIPRO + NO2	CCC1=CC2(CC)OOC(C)(C1ON(=O)=O)C2O	InChI=1S/C11H17NO6/c1-4-7-6-11(5-2)9(13)10(3,17-18-11)8(7)16-12(14)15/h6,8-9,13H,4-5H2,1-3H3	J54	2.99e-06	0.000335198	6.8088e-05	3.23144e-05	7.44882e-07
1156	DETLBPROOH	230.258	DETLBIPRO + OH	OOC1C(=CC2(CC)OOC1(C)C2O)CC	InChI=1S/C11H18O5/c1-4-7-6-11(5-2)9(12)10(3,15-16-11)8(7)14-13/h6,8-9,12-13H,4-5H2,1-3H3	J41	5.79e-06	0.000649096	0.0011165	1.92535e-05	1.22145e-05
1157	DETLMUNO3	275.255	EPXEALKT + EGLYOX + HO2 + NO2+ EPXEALKT + EGLYOX + HO2 + NO2	CCC(=O)C(O)C(C)(ON(=O)=O)C1OC1(CC)C=O	InChI=1S/C11H17NO7/c1-4-7(14)8(15)10(3,19-12(16)17)9-11(5-2,6-13)18-9/h6,8-9,15H,4-5H2,1-3H3	J17+J22	5.898e-05	0.00661204	0.00384726	0.00091486	4.20891e-05
1158	DETLMUO2H	212.242	C9M2CO6O2 + HO2+ C9M2CO6O2 + HO2	CCC(=O)C=C(C)C1OC1(CC)C(=O)O	InChI=1S/C11H16O4/c1-4-8(12)6-7(3)9-11(5-2,15-9)10(13)14/h6,9H,4-5H2,1-3H3,(H,13,14)	J23+J24	3.6e-06	0.000403583	0.000334439	0.000140722	3.65876e-06
1159	DETLMUO3H	228.242	C9M2CO6O2 + OH+ C9M2CO6O2 + OH+ C9M2CO6O2 + OH	CCC(=O)C=C(C)C1OC1(CC)C(=O)OO	InChI=1S/C11H16O5/c1-4-8(12)6-7(3)9-11(5-2,15-9)10(13)16-14/h6,9,14H,4-5H2,1-3H3	J41+J23+J24	9.39e-06	0.00105268	0.000419808	0.000140722	4.5927e-06
1160	DETLMUOH	230.258	DETLMUCO + HO2+ DETLMUCO + HO2	CCC(=O)C(O)C(C)(O)C1OC1(CC)C=O	InChI=1S/C11H18O5/c1-4-7(13)8(14)10(3,15)9-11(5-2,6-12)16-9/h6,8-9,14-15H,4-5H2,1-3H3	J17+J22	5.898e-05	0.00661204	0.002126	0.000564999	2.32584e-05
1161	DETLMUOOH	246.257	DETLMUCO + OH+ DETLMUCO + OH+ DETLMUCO + OH	CCC(=O)C(O)C(C)(OO)C1OC1(CC)C=O	InChI=1S/C11H18O6/c1-4-7(13)8(14)10(3,17-15)9-11(5-2,6-12)16-9/h6,8-9,14-15H,4-5H2,1-3H3	J41+J17+J22	6.477e-05	0.00726114	0.00266354	0.000565163	2.91391e-05
1162	DETLOBPROH	212.242	C7CODBCO3 + MGLYOX + HO2	CCC1=CC2(CC)OOC(C)(C1=O)C2O	InChI=1S/C11H16O4/c1-4-7-6-11(5-2)9(13)10(3,8(7)12)14-15-11/h6,9,13H,4-5H2,1-3H3	J22	3.98e-06	0.000446184	0.00241284	NaN	2.63965e-05
1163	DETLPOXMUC	196.243	C9M2CO6O2 + HO2 + CO+ EPXEALKT + C2H5CO3 + HO2 + CO	CCC(=O)C=C(C)C1OC1(CC)C=O	InChI=1S/C11H16O3/c1-4-9(13)6-8(3)10-11(5-2,7-12)14-10/h6-7,10H,4-5H2,1-3H3	J4.*0.028.*0.5+J4.*0.028.*0.5	0.00024976	0.0279997	0.00217244	0.000551971	2.37665e-05
1164	DHPMEK	136.037	CH3CO3 + HCOCH2OOH + OH+ CH3CO3 + HCOCH2OOH + OH+ MGLYOX + HCHO + OH + OH	OOCC(C(=O)C)OO	InChI=1S/C4H8O5/c1-3(5)4(9-7)2-8-6/h4,6-7H,2H2,1H3	J41+J22+J41	1.556e-05	0.00174438	0.0015685	3.78072e-05	1.71594e-05
1165	DHPMPAL	136.103	C3MDIALOOH + OH+ HYPERACET + OH + CO + HO2+ MGLYOX + OH + HCHO + OH	OOCC(C=O)(OO)C	InChI=1S/C4H8O5/c1-4(2-5,9-7)3-8-6/h2,6-7H,3H2,1H3	J41+J15+J41	3.148e-05	0.00352911	0.0034485	0.000119157	3.77266e-05
1166	DIBRETO2H	219.86	DIBRETO + OH	OOC(Br)CBr	InChI=1S/C2H4Br2O2/c3-1-2(4)6-5/h2,5H,1H2	J41	5.79e-06	0.000649096	0.000558251	1.36143e-05	6.10727e-06
1167	DICLETO2H	130.958	DICLETO + OH	OOC(Cl)CCl	InChI=1S/C2H4Cl2O2/c3-1-2(4)6-5/h2,5H,1H2	J41	5.79e-06	0.000649096	0.000558251	1.36143e-05	6.10727e-06
1168	DIEK	86.1323	C2H5CO3 + C2H5O2	CCC(=O)CC	InChI=1S/C5H10O/c1-3-5(6)4-2/h3-4H2,1-2H3	J22	3.98e-06	0.000446184	0.000194	7.13594e-05	2.12236e-06
1169	DIEKAOH	102.132	CH3CHO + C2H5CO3	CCC(=O)C(C)O	InChI=1S/C5H10O2/c1-3-5(7)4(2)6/h4,6H,3H2,1-2H3	J22	3.98e-06	0.000446184	0.000194	7.13594e-05	2.12236e-06
1170	DIEKAOOH	118.131	CH3CHO + C2H5CO3 + OH+ DIEKAO + OH	CC(OO)C(=O)CC	InChI=1S/C5H10O3/c1-3-5(6)4(2)8-7/h4,7H,3H2,1-2H3	J22+J41	9.77e-06	0.00109528	0.000752251	7.26465e-05	8.22963e-06
1171	DIEKBNO3	147.129	DIEKBO + NO2+ DIEKBO + NO2	CCC(=O)CCON(=O)=O	InChI=1S/C5H9NO4/c1-2-5(7)3-4-10-6(8)9/h2-4H2,1H3	J22+J53	5.77e-06	0.000646854	0.005455	0.00318905	5.96777e-05
1172	DIEKBOOH	118.131	DIEKBO + OH+ DIEKBO + OH	CCC(=O)CCOO	InChI=1S/C5H10O3/c1-2-5(6)3-4-8-7/h7H,2-4H2,1H3	J41+J22	9.77e-06	0.00109528	0.000752251	7.26465e-05	8.22963e-06
1173	DIETETNO3	135.119	DIETETO + NO2	CCOC(C)ON(=O)=O	InChI=1S/C4H9NO4/c1-3-8-4(2)9-5(6)7/h4H,3H2,1-2H3	J54	2.99e-06	0.000335198	0.000191843	1.89503e-05	2.09876e-06
1174	DIETETOOH	106.12	DIETETO + OH	CC(OCC)OO	InChI=1S/C4H10O3/c1-3-6-4(2)7-5/h4-5H,3H2,1-2H3	J41	5.79e-06	0.000649096	0.000558251	1.36143e-05	6.10727e-06
1175	DIIPRETNO3	163.172	DIIPRETO + NO2	CC(C)OC(C)(C)ON(=O)=O	InChI=1S/C6H13NO4/c1-5(2)10-6(3,4)11-7(8)9/h5H,1-4H3	J55	8.33e-06	0.000933847	0.00019272	3.23144e-05	2.10836e-06
1176	DIIPRETOOH	134.174	DIIPRETO + OH	OOC(C)(C)OC(C)C	InChI=1S/C6H14O3/c1-5(2)8-6(3,4)9-7/h5,7H,1-4H3	J41	5.79e-06	0.000649096	0.000558251	1.36143e-05	6.10727e-06
1177	DM123OOH	138.164	OXY1O + OH	OOc1cccc(C)c1C	InChI=1S/C8H10O2/c1-6-4-3-5-8(10-9)7(6)2/h3-5,9H,1-2H3	J41	5.79e-06	0.000649096	0.000558251	1.36143e-05	6.10727e-06
1178	DM124OOH	138.164	DM124O + OH	OOc1ccc(C)c(C)c1	InChI=1S/C8H10O2/c1-6-3-4-8(10-9)5-7(6)2/h3-5,9H,1-2H3	J41	5.79e-06	0.000649096	0.000558251	1.36143e-05	6.10727e-06
1179	DM35EBNO3	195.215	DM35EBO + NO2	Cc1cc(C)cc(c1)C(C)ON(=O)=O	InChI=1S/C10H13NO3/c1-7-4-8(2)6-10(5-7)9(3)14-11(12)13/h4-6,9H,1-3H3	J54	2.99e-06	0.000335198	6.8088e-05	3.23144e-05	7.44882e-07
1180	DM35EBOOH	166.217	DM35EBO + OH	OOC(C)c1cc(C)cc(C)c1	InChI=1S/C10H14O2/c1-7-4-8(2)6-10(5-7)9(3)12-11/h4-6,9,11H,1-3H3	J41	5.79e-06	0.000649096	0.000558251	1.36143e-05	6.10727e-06
1181	DMCNO3	151.075	DMCO + NO2	COC(=O)OCON(=O)=O	InChI=1S/C3H5NO6/c1-8-3(5)9-2-10-4(6)7/h2H2,1H3	J53	1.79e-06	0.000200671	0.00399917	0.000867	4.37509e-05
1182	DMCOOH	122.077	DMCO + OH	OOCOC(=O)OC	InChI=1S/C3H6O5/c1-6-3(4)7-2-8-5/h5H,2H2,1H3	J41	5.79e-06	0.000649096	0.000630851	2.61748e-05	6.90151e-06
1183	DMEBIPNO3	245.229	DMEBIPRO + NO2	CCC12OOC(C)(C(ON(=O)=O)C(=C1)C)C2O	InChI=1S/C10H15NO6/c1-4-10-5-6(2)7(15-11(13)14)9(3,8(10)12)16-17-10/h5,7-8,12H,4H2,1-3H3	J54	2.99e-06	0.000335198	6.8088e-05	3.23144e-05	7.44882e-07
1184	DMEBMUNO3	261.229	EPXMALKT + EGLYOX + HO2 + NO2+ EPXMALKT + EGLYOX + HO2 + NO2	CCC(=O)C(O)C(C)(ON(=O)=O)C1OC1(C)C=O	InChI=1S/C10H15NO7/c1-4-6(13)7(14)10(3,18-11(15)16)8-9(2,5-12)17-8/h5,7-8,14H,4H2,1-3H3	J17+J22	5.898e-05	0.00661204	0.00384726	0.00091486	4.20891e-05
1185	DMEBMUO2H	198.216	C8M2CO6O2 + HO2+ C8M2CO6O2 + HO2	CC(=CC(=O)CC)C1OC1(C)C(=O)O	InChI=1S/C10H14O4/c1-4-7(11)5-6(2)8-10(3,14-8)9(12)13/h5,8H,4H2,1-3H3,(H,12,13)	J23+J24	3.6e-06	0.000403583	0.000334439	0.000140722	3.65876e-06
1186	DMEBMUO3H	214.215	C8M2CO6O2 + OH+ C8M2CO6O2 + OH+ C8M2CO6O2 + OH	CCC(=O)C=C(C)C1OC1(C)C(=O)OO	InChI=1S/C10H14O5/c1-4-7(11)5-6(2)8-10(3,14-8)9(12)15-13/h5,8,13H,4H2,1-3H3	J41+J23+J24	9.39e-06	0.00105268	0.000419808	0.000140722	4.5927e-06
1187	DMEBMUOH	216.231	DMEBMUCO + HO2+ DMEBMUCO + HO2	CC(O)(C(O)C(=O)CC)C1OC1(C)C=O	InChI=1S/C10H16O5/c1-4-6(12)7(13)10(3,14)8-9(2,5-11)15-8/h5,7-8,13-14H,4H2,1-3H3	J17+J22	5.898e-05	0.00661204	0.002126	0.000564999	2.32584e-05
1188	DMEBMUOOH	232.23	DMEBMUCO + OH+ DMEBMUCO + OH+ DMEBMUCO + OH	CCC(=O)C(O)C(C)(OO)C1OC1(C)C=O	InChI=1S/C10H16O6/c1-4-6(12)7(13)10(3,16-14)8-9(2,5-11)15-8/h5,7-8,13-14H,4H2,1-3H3	J41+J17+J22	6.477e-05	0.00726114	0.00266354	0.000565163	2.91391e-05
1189	DMEBPOXMUC	182.216	C8M2CO6O2 + HO2 + CO+ EPXMALKT + C2H5CO3 + HO2 + CO	CC(=CC(=O)CC)C1OC1(C)C=O	InChI=1S/C10H14O3/c1-4-8(12)5-7(2)9-10(3,6-11)13-9/h5-6,9H,4H2,1-3H3	J4.*0.028.*0.5+J4.*0.028.*0.5	0.00024976	0.0279997	0.00217244	0.000551971	2.37665e-05
1190	DMEBPROOH	216.231	DMEBIPRO + OH	OOC1C(=CC2(CC)OOC1(C)C2O)C	InChI=1S/C10H16O5/c1-4-10-5-6(2)7(13-12)9(3,8(10)11)14-15-10/h5,7-8,11-12H,4H2,1-3H3	J41	5.79e-06	0.000649096	0.0011165	1.92535e-05	1.22145e-05
1191	DMEOBPROH	198.216	C4MCODBCO3 + EGLYOX + HO2	CCC12OOC(C)(C(=O)C(=C1)C)C2O	InChI=1S/C10H14O4/c1-4-10-5-6(2)7(11)9(3,8(10)12)13-14-10/h5,8,12H,4H2,1-3H3	J22	3.98e-06	0.000446184	0.000334439	0.000140722	3.65876e-06
1192	DMEPHOLOOH	232.23	DMEPHOLO + OH	CCC12OOC(C)(C=C(C)C2(O)OO)C1O	InChI=1S/C10H16O6/c1-4-9-7(11)8(3,15-16-9)5-6(2)10(9,12)14-13/h5,7,11-13H,4H2,1-3H3	J41	5.79e-06	0.000649096	0.00053754	1.36143e-05	5.88069e-06
1193	DMK2OH	146.141	CO2H3CHO + CH3CO3 + HO2	CC(=O)C(O)C(O)C(=O)C	InChI=1S/C6H10O4/c1-3(7)5(9)6(10)4(2)8/h5-6,9-10H,1-2H3	J22.*2	7.96e-06	0.000892368	0.000866	0.000610092	9.47404e-06
1194	DMKCOOH	144.125	CO23C3CHO + CH3CO3 + HO2+ CO2H3CO3 + CH3CO3	CC(=O)C(=O)C(O)C(=O)C	InChI=1S/C6H8O4/c1-3(7)5(9)6(10)4(2)8/h5,9H,1-2H3	J22+J35	0.00027198	0.0304907	0.0290419	0.0076363	0.000317719
1195	DMKOHOOH	162.141	CO2H3CHO + CH3CO3 + OH+ DMKOHO + OH	OOC(C(=O)C)C(O)C(=O)C	InChI=1S/C6H10O5/c1-3(7)5(9)6(11-10)4(2)8/h5-6,9-10H,1-2H3	J22.*2+J41	1.375e-05	0.00154146	0.00140354	0.000610244	1.53547e-05
1196	DMMALYOOH	176.124	DMMALYO + OH	OOC1(C)C(=O)OC(=O)C1(C)O	InChI=1S/C6H8O6/c1-5(9)3(7)11-4(8)6(5,2)12-10/h9-10H,1-2H3	J41	5.79e-06	0.000649096	0.00140354	0.000610244	1.53547e-05
1197	DMMANO3	137.091	DMMAO + NO2	COCOCON(=O)=O	InChI=1S/C3H7NO5/c1-7-2-8-3-9-4(5)6/h2-3H2,1H3	J53	1.79e-06	0.000200671	0.000190129	3.66408e-05	2.08001e-06
1198	DMMAOOH	108.093	DMMAO + OH	COCOCOO	InChI=1S/C3H8O4/c1-5-2-6-3-7-4/h4H,2-3H2,1H3	J41	5.79e-06	0.000649096	0.000558251	1.36143e-05	6.10727e-06
1199	DMMBNO3	137.091	DMMBO + NO2	COC(OC)ON(=O)=O	InChI=1S/C3H7NO5/c1-7-3(8-2)9-4(5)6/h3H,1-2H3	J54	2.99e-06	0.000335198	0.000190129	3.66408e-05	2.08001e-06
1200	DMMBOOH	108.093	DMMBO + OH	COC(OC)OO	InChI=1S/C3H8O4/c1-5-3(6-2)7-4/h3-4H,1-2H3	J41	5.79e-06	0.000649096	0.000558251	1.36143e-05	6.10727e-06
1201	DMPHCOME	148.202	TMBCO3 + CH3O2	Cc1cc(C)cc(c1)C(=O)C	InChI=1S/C10H12O/c1-7-4-8(2)6-10(5-7)9(3)11/h4-6H,1-3H3	J22	3.98e-06	0.000446184	0.000288	0.000185347	3.15072e-06
1202	DMPHCOMOH	164.201	TMBCO3 + HCHO + HO2	OCC(=O)c1cc(C)cc(C)c1	InChI=1S/C10H12O2/c1-7-3-8(2)5-9(4-7)10(12)6-11/h3-5,11H,6H2,1-2H3	J22	3.98e-06	0.000446184	0.000288	0.000185347	3.15072e-06
1203	DMPHCOMOOH	180.201	DMPHCOMO + OH+ TMBCO3 + HCHO + OH	OOCC(=O)c1cc(C)cc(C)c1	InChI=1S/C10H12O3/c1-7-3-8(2)5-9(4-7)10(11)6-13-12/h3-5,12H,6H2,1-2H3	J41+J22	9.77e-06	0.00109528	0.000846251	0.000185846	9.25799e-06
1204	DMPHGLYOX	162.185	TMBCO3 + HO2 + CO	O=CC(=O)c1cc(C)cc(C)c1	InChI=1S/C10H10O2/c1-7-3-8(2)5-9(4-7)10(12)6-11/h3-6H,1-2H3	J34	0.000125	0.0140133	0.002126	0.000564999	2.32584e-05
1205	DMPHOOH	138.164	DMPHO + OH	OOc1cc(C)cc(C)c1	InChI=1S/C8H10O2/c1-6-3-7(2)5-8(4-6)10-9/h3-5,9H,1-2H3	J41	5.79e-06	0.000649096	0.000558251	1.36143e-05	6.10727e-06
1206	DMSO2OOH	126.132	DMSO2O + OH	OOCS(=O)(=O)C	InChI=1S/C2H6O4S/c1-7(4,5)2-6-3/h3H,2H2,1H3	J41	5.79e-06	0.000649096	0.000558251	1.36143e-05	6.10727e-06
1207	DNC524CO	240.125	HMVKNO3 + CO + HO2 + NO2	OCC(ON(=O)=O)C(CO)(C=O)ON(=O)=O	InChI=1S/C5H8N2O9/c8-1-4(15-6(11)12)5(2-9,3-10)16-7(13)14/h2,4,8,10H,1,3H2	J56.*4	0.0001264	0.0141703	0.0176205	0.00572939	0.000192768
1208	DNCRESOOH	280.146	DNCRESO + OH	OOC1(O)C(=CC2(OOC1(C)C2O)N(=O)=O)N(=O)=O	InChI=1S/C7H8N2O10/c1-5-4(10)6(9(14)15,19-18-5)2-3(8(12)13)7(5,11)17-16/h2,4,10-11,16H,1H3	J41	5.79e-06	0.000649096	0.00107508	1.92535e-05	1.17614e-05
1209	DNEBNZLOOH	294.172	DNEBNZLO + OH	CCC12OOC(C=C(N(=O)=O)C2(O)OO)(N(=O)=O)C1O	InChI=1S/C8H10N2O10/c1-2-6-5(11)7(10(15)16,20-19-6)3-4(9(13)14)8(6,12)18-17/h3,5,11-12,17H,2H2,1H3	J41	5.79e-06	0.000649096	0.00053754	1.36143e-05	5.88069e-06
1210	DNIPBZLOOH	308.199	DNIPBNZLO + OH	OOC1(O)C(=CC2(OOC1(C(C)C)C2O)N(=O)=O)N(=O)=O	InChI=1S/C9H12N2O10/c1-4(2)8-6(12)7(11(16)17,20-21-8)3-5(10(14)15)9(8,13)19-18/h3-4,6,12-13,18H,1-2H3	J41	5.79e-06	0.000649096	0.00107508	1.92535e-05	1.17614e-05
1211	DNMETOLOOH	308.199	DNMETOLO + OH	CCC1=C(N(=O)=O)C2(OOC(C)(C2O)C1(O)OO)N(=O)=O	InChI=1S/C9H12N2O10/c1-3-4-5(10(14)15)8(11(16)17)6(12)7(2,20-21-8)9(4,13)19-18/h6,12-13,18H,3H2,1-2H3	J41	5.79e-06	0.000649096	0.00053754	1.36143e-05	5.88069e-06
1212	DNMXYOLOOH	294.172	DNMXYOLO + OH	OOC1(O)C(=C(N(=O)=O)C2(OOC1(C)C2O)N(=O)=O)C	InChI=1S/C8H10N2O10/c1-3-4(9(13)14)7(10(15)16)5(11)6(2,19-20-7)8(3,12)18-17/h5,11-12,17H,1-2H3	J41	5.79e-06	0.000649096	0.00107508	1.92535e-05	1.17614e-05
1213	DNOETOLOOH	308.199	DNOETOLO + OH	CCC12OOC(N(=O)=O)(C2O)C(O)(OO)C(=C1C)N(=O)=O	InChI=1S/C9H12N2O10/c1-3-7-4(2)5(10(14)15)9(13,19-18)8(6(7)12,11(16)17)21-20-7/h6,12-13,18H,3H2,1-2H3	J41	5.79e-06	0.000649096	0.00053754	1.36143e-05	5.88069e-06
1214	DNOXYOLOOH	294.172	DNOXYOLO + OH	OOC1(O)C(=C(C)C2(C)OOC1(N(=O)=O)C2O)N(=O)=O	InChI=1S/C8H10N2O10/c1-3-4(9(13)14)8(12,18-17)7(10(15)16)5(11)6(3,2)19-20-7/h5,11-12,17H,1-2H3	J41	5.79e-06	0.000649096	0.00107508	1.92535e-05	1.17614e-05
1215	DNPBNZLOOH	308.199	DNPBNZLO + OH	CCCC12OOC(C=C(N(=O)=O)C2(O)OO)(N(=O)=O)C1O	InChI=1S/C9H12N2O10/c1-2-3-7-6(12)8(11(16)17,21-20-7)4-5(10(14)15)9(7,13)19-18/h4,6,12-13,18H,2-3H2,1H3	J41	5.79e-06	0.000649096	0.00053754	1.36143e-05	5.88069e-06
1216	DNPETOLOOH	308.199	DNPETOLO + OH	CCC12OOC(N(=O)=O)(C(=C(N(=O)=O)C2(O)OO)C)C1O	InChI=1S/C9H12N2O10/c1-3-7-6(12)8(11(16)17,21-20-7)4(2)5(10(14)15)9(7,13)19-18/h6,12-13,18H,3H2,1-2H3	J41	5.79e-06	0.000649096	0.00053754	1.36143e-05	5.88069e-06
1217	DNPHENOOH	266.119	DNPHENO + OH	OOC1(O)C(=CC2(OOC1C2O)N(=O)=O)N(=O)=O	InChI=1S/C6H6N2O10/c9-3-4-6(10,17-15)2(7(11)12)1-5(3,8(13)14)18-16-4/h1,3-4,9-10,15H	J41	5.79e-06	0.000649096	0.00107508	1.92535e-05	1.17614e-05
1218	DNPXYOLOOH	294.172	DNPXYOLO + OH	OOC1(O)C(=C(C)C2(OOC1(C)C2O)N(=O)=O)N(=O)=O	InChI=1S/C8H10N2O10/c1-3-4(9(13)14)8(12,18-17)6(2)5(11)7(3,10(15)16)20-19-6/h5,11-12,17H,1-2H3	J41	5.79e-06	0.000649096	0.00107508	1.92535e-05	1.17614e-05
1219	DNT123LOOH	308.199	DNT123LO + OH	OOC1(O)C(=C(C)C2(C)OOC1(N(=O)=O)C2(C)O)N(=O)=O	InChI=1S/C9H12N2O10/c1-4-5(10(14)15)8(13,19-18)9(11(16)17)7(3,12)6(4,2)20-21-9/h12-13,18H,1-3H3	J41	5.79e-06	0.000649096	0.00107508	1.92535e-05	1.17614e-05
1220	DNT124LOOH	308.199	DNT124LO + OH	OOC1(O)C(=C(C)C2(OOC1(C)C2(C)O)N(=O)=O)N(=O)=O	InChI=1S/C9H12N2O10/c1-4-5(10(14)15)9(13,19-18)7(3)6(2,12)8(4,11(16)17)21-20-7/h12-13,18H,1-3H3	J41	5.79e-06	0.000649096	0.00107508	1.92535e-05	1.17614e-05
1221	EBENZOLOOH	204.177	EBENZOLO + OH	OOC1(O)C=CC2(CC)OOC1C2O	InChI=1S/C8H12O6/c1-2-7-3-4-8(10,13-11)6(5(7)9)12-14-7/h3-6,9-11H,2H2,1H3	J41	5.79e-06	0.000649096	0.00107508	1.92535e-05	1.17614e-05
1222	EBENZOOH	138.164	EBENZO + OH	OOc1ccccc1CC	InChI=1S/C8H10O2/c1-2-7-5-3-4-6-8(7)10-9/h3-6,9H,2H2,1H3	J41	5.79e-06	0.000649096	0.000558251	1.36143e-05	6.10727e-06
1223	EBFUOOH	162.141	EBFUO + OH	CCC1OC(=O)C(OO)C1O	InChI=1S/C6H10O5/c1-2-3-4(7)5(11-9)6(8)10-3/h3-5,7,9H,2H2,1H3	J41	5.79e-06	0.000649096	0.00097054	0.000431615	1.06177e-05
1224	EBZBPERNO3	217.176	EBZBIPERO + NO2	CCC12C=CC(ON(=O)=O)C(OO1)C2O	InChI=1S/C8H11NO6/c1-2-8-4-3-5(13-9(11)12)6(7(8)10)14-15-8/h3-7,10H,2H2,1H3	J54	2.99e-06	0.000335198	6.8088e-05	3.23144e-05	7.44882e-07
1225	EBZBPEROOH	188.178	EBZBIPERO + OH	OOC1C=CC2(CC)OOC1C2O	InChI=1S/C8H12O5/c1-2-8-4-3-5(11-10)6(7(8)9)12-13-8/h3-7,9-10H,2H2,1H3	J41	5.79e-06	0.000649096	0.00107508	1.92535e-05	1.17614e-05
1226	EBZMUCCO	186.162	C2H5CO3 + EPXC4DIAL + CO + HO2+ C2H5CO3 + EPXC4DIAL + CO + HO2	CCC(=O)C(=O)C(O)C1OC1C=O	InChI=1S/C8H10O5/c1-2-4(10)6(11)7(12)8-5(3-9)13-8/h3,5,7-8,12H,2H2,1H3	J17+J35	0.000323	0.0362104	0.0304469	0.00764277	0.00033309
1227	EBZMUCCO2H	170.163	C715CO2O2 + HO2+ C715CO2O2 + HO2	CCC(=O)C=CC1OC1C(=O)O	InChI=1S/C8H10O4/c1-2-5(9)3-4-6-7(12-6)8(10)11/h3-4,6-7H,2H2,1H3,(H,10,11)	J23+J24	3.6e-06	0.000403583	0.000334439	0.000140722	3.65876e-06
1228	EBZMUCCO3H	186.162	C715CO2O2 + OH+ C715CO2O2 + OH+ C715CO2O2 + OH	CCC(=O)C=CC1OC1C(=O)OO	InChI=1S/C8H10O5/c1-2-5(9)3-4-6-7(12-6)8(10)13-11/h3-4,6-7,11H,2H2,1H3	J41+J23+J24	9.39e-06	0.00105268	0.000419808	0.000140722	4.5927e-06
1229	EBZMUCNO3	233.175	EPXC4DIAL + NO2 + C2H5CO3 + CO + HO2+ EPXC4DIAL + NO2 + C2H5CO3 + CO + HO2	O=CC1OC1C(O)C(ON(=O)=O)C(=O)CC	InChI=1S/C8H11NO7/c1-2-4(11)7(16-9(13)14)6(12)8-5(3-10)15-8/h3,5-8,12H,2H2,1H3	J17+J22	5.898e-05	0.00661204	0.00384726	0.00091486	4.20891e-05
1230	EBZMUCOH	188.178	EBZMUCO + HO2+ EBZMUCO + HO2	CCC(=O)C(O)C(O)C1OC1C=O	InChI=1S/C8H12O5/c1-2-4(10)6(11)7(12)8-5(3-9)13-8/h3,5-8,11-12H,2H2,1H3	J17+J22	5.898e-05	0.00661204	0.002126	0.000564999	2.32584e-05
1231	EBZMUCOOH	204.177	EBZMUCO + OH+ EBZMUCO + OH+ EBZMUCO + OH	CCC(=O)C(OO)C(O)C1OC1C=O	InChI=1S/C8H12O6/c1-2-4(10)7(14-12)6(11)8-5(3-9)13-8/h3,5-8,11-12H,2H2,1H3	J41+J17+J22	6.477e-05	0.00726114	0.00266354	0.000565163	2.91391e-05
1232	EBZOBPEROH	170.163	C6DCARBBO2 + GLYOX + HO2	CCC12OOC(C(=O)C=C1)C2O	InChI=1S/C8H10O4/c1-2-8-4-3-5(9)6(7(8)10)11-12-8/h3-4,6-7,10H,2H2,1H3	J22	3.98e-06	0.000446184	0.000334439	0.000140722	3.65876e-06
1233	EBZPOXMUC	154.163	C715CO2O2 + HO2 + CO+ EPXC4DIAL + C2H5CO3 + HO2 + CO	CCC(=O)C=CC1OC1C=O	InChI=1S/C8H10O3/c1-2-6(10)3-4-7-8(5-9)11-7/h3-5,7-8H,2H2,1H3	J4.*0.028.*0.5+J4.*0.028.*0.5	0.00024976	0.0279997	0.00217244	0.000551971	2.37665e-05
1234	ECATEC1OOH	154.163	ECATEC1O + OH	CCc1cccc(O)c1OO	InChI=1S/C8H10O3/c1-2-6-4-3-5-7(9)8(6)11-10/h3-5,9-10H,2H2,1H3	J41	5.79e-06	0.000649096	0.00053754	1.36143e-05	5.88069e-06
1235	ECO3CO3H	174.108	C2H5CO3 + CO + CO + OH+ C2H5CO3 + CO + CO + OH	CCC(=O)C(=O)C(=O)C(=O)OO	InChI=1S/C6H6O6/c1-2-3(7)4(8)5(9)6(10)12-11/h11H,2H2,1H3	J41+J35.*2	0.00054179	0.0607382	0.0572179	0.0107821	0.000625964
1236	ECO4	142.109	C2H5CO3 + CO + CO + HO2 + CO+ HCOCO + C2H5CO3 + CO	CCC(=O)C(=O)C(=O)C=O	InChI=1S/C6H6O4/c1-2-4(8)6(10)5(9)3-7/h3H,2H2,1H3	J35+J35.*2	0.000804	0.0901336	0.0312519	0.0076363	0.000341896
1237	ECOCO2H	102.089	C2H5CO3 + HO2	CCC(=O)C(=O)O	InChI=1S/C4H6O3/c1-2-3(5)4(6)7/h2H2,1H3,(H,6,7)	J34	0.000125	0.0140133	0.0186	0.016	0.000203484
1238	EGLYOX	86.0892	C2H5CO3 + CO + HO2	CCC(=O)C=O	InChI=1S/C4H6O2/c1-2-4(6)3-5/h3H,2H2,1H3	J34	0.000125	0.0140133	0.0142087	0.00046023	0.000155444
1239	EIPEOOH	120.147	EIPEO + OH	CCOC(C)(C)OO	InChI=1S/C5H12O3/c1-4-7-5(2,3)8-6/h6H,4H2,1-3H3	J41	5.79e-06	0.000649096	0.000558251	1.36143e-05	6.10727e-06
1240	EIPK	100.159	C2H5CO3 + IC3H7O2+ C2H5O2 + IPRCO3	CCC(=O)C(C)C	InChI=1S/C6H12O/c1-4-6(7)5(2)3/h5H,4H2,1-3H3	J22+J22	7.96e-06	0.000892368	0.00278425	0.0004314	3.04597e-05
1241	EIPKAOH	116.158	C2H5CO3 + CH3COCH3 + HO2	CCC(=O)C(C)(C)O	InChI=1S/C6H12O2/c1-4-5(7)6(2,3)8/h8H,4H2,1-3H3	J22	3.98e-06	0.000446184	0.000433	0.0004314	4.73702e-06
1242	EIPKAOOH	132.158	C2H5CO3 + CH3COCH3 + OH+ EIPKAO + OH	CCC(=O)C(C)(C)OO	InChI=1S/C6H12O3/c1-4-5(7)6(2,3)9-8/h8H,4H2,1-3H3	J22+J41	9.77e-06	0.00109528	0.000991251	0.000431615	1.08443e-05
1243	EIPKBNO3	161.156	EIPKBO + NO2+ EIPKBO + NO2	CCC(=O)C(C)CON(=O)=O	InChI=1S/C6H11NO4/c1-3-6(8)5(2)4-11-7(9)10/h5H,3-4H2,1-2H3	J53+J22	5.77e-06	0.000646854	0.00465	0.000743034	5.0871e-05
1244	EIPKBOH	116.158	C2H5CO3 + HYPROPO2	OCC(C)C(=O)CC	InChI=1S/C6H12O2/c1-3-6(8)5(2)4-7/h5,7H,3-4H2,1-2H3	J22	3.98e-06	0.000446184	0.000433	0.0004314	4.73702e-06
1245	EIPKBOOH	132.158	EIPKBO + OH+ EIPKBO + OH	CC(COO)C(=O)CC	InChI=1S/C6H12O3/c1-3-6(7)5(2)4-9-8/h5,8H,3-4H2,1-2H3	J41+J22	9.77e-06	0.00109528	0.000991251	0.000431615	1.08443e-05
1246	EMALNHYOOH	176.124	EMALANHYO + OH	CCC1(OO)C(O)C(=O)OC1=O	InChI=1S/C6H8O6/c1-2-6(12-10)3(7)4(8)11-5(6)9/h3,7,10H,2H2,1H3	J41	5.79e-06	0.000649096	0.00140354	0.000610244	1.53547e-05
1247	EMPHCO3H	180.201	EMPHO2 + OH	OOC(=O)c1cc(CC)cc(C)c1	InChI=1S/C10H12O3/c1-3-8-4-7(2)5-9(6-8)10(11)13-12/h4-6,12H,3H2,1-2H3	J41	5.79e-06	0.000649096	8.5369e-05	NaN	9.33937e-07
1248	EMPHCOME	162.228	EMPHCO3 + CH3O2	CCc1cc(C)cc(c1)C(=O)C	InChI=1S/C11H14O/c1-4-10-5-8(2)6-11(7-10)9(3)12/h5-7H,4H2,1-3H3	J22	3.98e-06	0.000446184	0.000288	0.000185347	3.15072e-06
1249	EMPHCOMOH	178.228	EMPHCO3 + HCHO + HO2	OCC(=O)c1cc(CC)cc(C)c1	InChI=1S/C11H14O2/c1-3-9-4-8(2)5-10(6-9)11(13)7-12/h4-6,12H,3,7H2,1-2H3	J22	3.98e-06	0.000446184	0.000288	0.000185347	3.15072e-06
1250	EMPHCOMOOH	194.227	EMPHCO3 + HCHO + OH+ EMPHCOMO + OH	OOCC(=O)c1cc(C)cc(CC)c1	InChI=1S/C11H14O3/c1-3-9-4-8(2)5-10(6-9)11(12)7-14-13/h4-6,13H,3,7H2,1-2H3	J22+J41	9.77e-06	0.00109528	0.000846251	0.000185846	9.25799e-06
1251	EMPHGLYOX	176.212	EMPHCO3 + HO2 + CO	O=CC(=O)c1cc(CC)cc(C)c1	InChI=1S/C11H12O2/c1-3-9-4-8(2)5-10(6-9)11(13)7-12/h4-7H,3H2,1-2H3	J34	0.000125	0.0140133	0.002126	0.000564999	2.32584e-05
1252	EMPHOOH	152.19	EMPHO + OH	CCc1cc(OO)cc(C)c1	InChI=1S/C9H12O2/c1-3-8-4-7(2)5-9(6-8)11-10/h4-6,10H,3H2,1-2H3	J41	5.79e-06	0.000649096	0.000558251	1.36143e-05	6.10727e-06
1253	EMPONO2OOH	263.201	EMPOHNO2O + OH	CCC1=CC(O)(OO)C2(OOC1C2(C)O)N(=O)=O	InChI=1S/C9H13NO8/c1-3-5-4-8(12,17-15)9(10(13)14)7(2,11)6(5)16-18-9/h4,6,11-12,15H,3H2,1-2H3	J41	5.79e-06	0.000649096	0.00107508	1.92535e-05	1.17614e-05
1254	ENCATECOOH	265.174	ENCATECO + OH	OOC1(O)C(=C(N(=O)=O)C2OOC1(CC)C2O)O	InChI=1S/C8H11NO9/c1-2-7-6(11)4(16-18-7)3(9(13)14)5(10)8(7,12)17-15/h4,6,10-12,15H,2H2,1H3	J41	5.79e-06	0.000649096	0.00107508	1.92535e-05	1.17614e-05
1255	ENNCATCOOH	310.172	ENNCATECO + OH	CCC12OOC(C(=C(O)C2(O)OO)N(=O)=O)C1ON(=O)=O	InChI=1S/C8H10N2O11/c1-2-7-6(18-10(15)16)4(19-21-7)3(9(13)14)5(11)8(7,12)20-17/h4,6,11-12,17H,2H2,1H3	J41	5.79e-06	0.000649096	0.000605628	3.50652e-05	6.62557e-06
1256	EOCOCH2OOH	120.104	EOCOCH2O + OH	CCOC(=O)COO	InChI=1S/C4H8O4/c1-2-7-4(5)3-8-6/h6H,2-3H2,1H3	J41	5.79e-06	0.000649096	0.00101025	3.52709e-05	1.10521e-05
1257	EOCOCHO	102.089	C2H5O2 + CO + HO2	CCOC(=O)C=O	InChI=1S/C4H6O3/c1-2-7-4(6)3-5/h3H,2H2,1H3	J34	0.000125	0.0140133	0.0142087	0.00046023	0.000155444
1258	EOX2ETCHO	88.1051	HO2 + CO + ETOMEO2	CCOCC=O	InChI=1S/C4H8O2/c1-2-6-4-3-5/h3H,2,4H2,1H3	J15	1.99e-05	0.00223092	0.00188	0.000113	2.05672e-05
1259	EOX2OLANO3	151.118	EOX2EOLAO + NO2	CCOC(CO)ON(=O)=O	InChI=1S/C4H9NO5/c1-2-9-4(3-6)10-5(7)8/h4,6H,2-3H2,1H3	J54	2.99e-06	0.000335198	1.09485e-05	1.89503e-05	1.19776e-07
1260	EOX2OLAOOH	122.12	EOX2EOLAO + OH	CCOC(CO)OO	InChI=1S/C4H10O4/c1-2-7-4(3-5)8-6/h4-6H,2-3H2,1H3	J41	5.79e-06	0.000649096	0.00053754	1.36143e-05	5.88069e-06
1261	EOX2OLBNO3	151.118	EOX2EOLBO + NO2	OCCOC(C)ON(=O)=O	InChI=1S/C4H9NO5/c1-4(9-3-2-6)10-5(7)8/h4,6H,2-3H2,1H3	J54	2.99e-06	0.000335198	0.000191843	1.89503e-05	2.09876e-06
1262	EOX2OLBOOH	122.12	EOX2EOLBO + OH	OCCOC(C)OO	InChI=1S/C4H10O4/c1-4(8-6)7-3-2-5/h4-6H,2-3H2,1H3	J41	5.79e-06	0.000649096	0.00053754	1.36143e-05	5.88069e-06
1263	EPXALMKT	128.126	C4CO2O2 + CH3CO3+ C4MCO2O2 + HO2 + CO	O=CC1OC1(C)C(=O)C	InChI=1S/C6H8O3/c1-4(8)6(2)5(3-7)9-6/h3,5H,1-2H3	J22+J17	5.898e-05	0.00661204	0.002643	0.000431438	2.89144e-05
1264	EPXC4DIAL	100.073	C3DIALO2 + CO + HO2	O=CC1OC1C=O	InChI=1S/C4H4O3/c5-1-3-4(2-6)7-3/h1-4H	J17.*2	0.00011	0.0123317	0.00376	0.000159806	4.11344e-05
1265	EPXDLCO2H	116.072	C3DIALO2 + HO2	O=CC1OC1C(=O)O	InChI=1S/C4H4O4/c5-1-2-3(8-2)4(6)7/h1-3H,(H,6,7)	J17	5.5e-05	0.00616586	0.00188	0.000113	2.05672e-05
1266	EPXDLCO3H	132.072	C3DIALO2 + OH+ C3DIALO2 + OH	OOC(=O)C1OC1C=O	InChI=1S/C4H4O5/c5-1-2-3(8-2)4(6)9-7/h1-3,7H	J41+J17	6.079e-05	0.00681495	0.00196537	0.000113	2.15011e-05
1267	EPXEALKT	142.153	C3EDIALO2 + CH3CO3+ CO24C63O2 + HO2 + CO	CCC1(C=O)OC1C(=O)C	InChI=1S/C7H10O3/c1-3-7(4-8)6(10-7)5(2)9/h4,6H,3H2,1-2H3	J22+J17	5.898e-05	0.00661204	0.001328	0.000248816	1.45283e-05
1268	EPXEKTCO2H	158.152	CO24C63O2 + HO2	CCC1(OC1C(=O)C)C(=O)O	InChI=1S/C7H10O4/c1-3-7(6(9)10)5(11-7)4(2)8/h5H,3H2,1-2H3,(H,9,10)	J22	3.98e-06	0.000446184	0.000288	0.000185347	3.15072e-06
1269	EPXEKTCO3H	174.151	CO24C63O2 + OH+ CO24C63O2 + OH	CCC1(OC1C(=O)C)C(=O)OO	InChI=1S/C7H10O5/c1-3-7(6(9)12-10)5(11-7)4(2)8/h5,10H,3H2,1-2H3	J41+J22	9.77e-06	0.00109528	0.000373369	0.000185347	4.08466e-06
1270	EPXKTMCO2H	144.125	C4MCO2O2 + HO2	OC(=O)C1OC1(C)C(=O)C	InChI=1S/C6H8O4/c1-3(7)6(2)4(10-6)5(8)9/h4H,1-2H3,(H,8,9)	J22	3.98e-06	0.000446184	0.000433	0.0004314	4.73702e-06
1271	EPXKTMCO3H	160.125	C4MCO2O2 + OH+ C4MCO2O2 + OH	CC1(OC1C(=O)OO)C(=O)C	InChI=1S/C6H8O5/c1-3(7)6(2)4(10-6)5(8)11-9/h4,9H,1-2H3	J41+J22	9.77e-06	0.00109528	0.000866	0.000610092	9.47404e-06
1272	EPXM2C4DAL	128.126	C4MCO2O2 + HO2 + CO	O=CC1(C)OC1(C)C=O	InChI=1S/C6H8O3/c1-5(3-7)6(2,4-8)9-5/h3-4H,1-2H3	J17.*2	0.00011	0.0123317	0.00442	8.0893e-06	4.83548e-05
1273	EPXM2DCO2H	144.125	C4MCO2O2 + HO2	O=CC1(C)OC1(C)C(=O)O	InChI=1S/C6H8O4/c1-5(3-7)6(2,10-5)4(8)9/h3H,1-2H3,(H,8,9)	J17	5.5e-05	0.00616586	0.00221	5.72e-06	2.41774e-05
1274	EPXM2DCO3H	160.125	C4MCO2O2 + OH+ C4MCO2O2 + OH	CC1(OC1(C)C=O)C(=O)OO	InChI=1S/C6H8O5/c1-5(3-7)6(2,11-5)4(8)10-9/h3,9H,1-2H3	J41+J17	6.079e-05	0.00681495	0.002643	0.000431438	2.89144e-05
1275	EPXMALKT	128.126	C3MDIALO2 + CH3CO3+ CO24C53O2 + HO2 + CO	O=CC1(C)OC1C(=O)C	InChI=1S/C6H8O3/c1-4(8)5-6(2,3-7)9-5/h3,5H,1-2H3	J22+J17	5.898e-05	0.00661204	0.002643	0.000431438	2.89144e-05
1276	EPXMC4DIAL	114.099	C3MDIALO2 + CO + HO2	O=CC1OC1(C)C=O	InChI=1S/C5H6O3/c1-5(3-7)4(2-6)8-5/h2-4H,1H3	J17.*2	0.00011	0.0123317	0.0033	6.03869e-06	3.6102e-05
1277	EPXMDLCO2H	130.099	C3MDIALO2 + HO2	O=CC1(C)OC1C(=O)O	InChI=1S/C5H6O4/c1-5(2-6)3(9-5)4(7)8/h2-3H,1H3,(H,7,8)	J17	5.5e-05	0.00616586	0.00165	4.27e-06	1.8051e-05
1278	EPXMDLCO3H	146.098	C3MDIALO2 + OH+ C3MDIALO2 + OH	CC1(OC1C(=O)OO)C=O	InChI=1S/C5H6O5/c1-5(2-6)3(9-5)4(7)10-8/h2-3,8H,1H3	J41+J17	6.079e-05	0.00681495	0.001844	7.1487e-05	2.01734e-05
1279	EPXMEC4DAL	142.153	C4ECO2O2 + HO2 + CO	CCC1(C=O)OC1(C)C=O	InChI=1S/C7H10O3/c1-3-7(5-9)6(2,4-8)10-7/h4-5H,3H2,1-2H3	J17.*2	0.00011	0.0123317	0.00208	0.000234759	2.27552e-05
1280	EPXMEDCO2H	158.152	C4ECO2O2 + HO2	CCC1(C=O)OC1(C)C(=O)O	InChI=1S/C7H10O4/c1-3-7(4-8)6(2,11-7)5(9)10/h4H,3H2,1-2H3,(H,9,10)	J17	5.5e-05	0.00616586	0.00104	0.000166	1.13776e-05
1281	EPXMEDCO3H	174.151	C4ECO2O2 + OH+ C4ECO2O2 + OH	CC1(OC1(CC)C=O)C(=O)OO	InChI=1S/C7H10O5/c1-3-7(4-8)6(2,12-7)5(9)11-10/h4,10H,3H2,1-2H3	J41+J17	6.079e-05	0.00681495	0.001328	0.000248816	1.45283e-05
1282	EPXMKTCO2H	144.125	CO24C53O2 + HO2	CC(=O)C1OC1(C)C(=O)O	InChI=1S/C6H8O4/c1-3(7)4-6(2,10-4)5(8)9/h4H,1-2H3,(H,8,9)	J22	3.98e-06	0.000446184	0.000433	0.0004314	4.73702e-06
1283	EPXMKTCO3H	160.125	CO24C53O2 + OH+ CO24C53O2 + OH	CC1(OC1C(=O)C)C(=O)OO	InChI=1S/C6H8O5/c1-3(7)4-6(2,10-4)5(8)11-9/h4,9H,1-2H3	J41+J22	9.77e-06	0.00109528	0.000518369	0.0004314	5.67096e-06
1284	ETACETNO3	149.102	ETHACETO + NO2	CC(=O)OC(C)ON(=O)=O	InChI=1S/C4H7NO5/c1-3(6)9-4(2)10-5(7)8/h4H,1-2H3	J54	2.99e-06	0.000335198	0.00448667	0.0022266	4.90841e-05
1285	ETBEACHO	116.158	EIPEO2 + HO2 + CO	CCOC(C)(C)C=O	InChI=1S/C6H12O2/c1-4-8-6(2,3)5-7/h5H,4H2,1-3H3	J17	5.5e-05	0.00616586	0.00676923	5.72e-06	7.40554e-05
1286	ETBEACO3H	148.157	EIPEO2 + OH	CCOC(C)(C)C(=O)OO	InChI=1S/C6H12O4/c1-4-9-6(2,3)5(7)10-8/h8H,4H2,1-3H3	J41	5.79e-06	0.000649096	8.5369e-05	NaN	9.33937e-07
1287	ETBEANO3	163.172	ETBEAO + NO2	CCOC(C)(C)CON(=O)=O	InChI=1S/C6H13NO4/c1-4-10-6(2,3)5-11-7(8)9/h4-5H2,1-3H3	J53	1.79e-06	0.000200671	0.00019272	3.23144e-05	2.10836e-06
1288	ETBEAOOH	134.174	ETBEAO + OH	CCOC(C)(C)COO	InChI=1S/C6H14O3/c1-4-8-6(2,3)5-9-7/h7H,4-5H2,1-3H3	J41	5.79e-06	0.000649096	0.000558251	1.36143e-05	6.10727e-06
1289	ETBEBNO3	163.172	ETBEBO + NO2	O=N(=O)OC(C)OC(C)(C)C	InChI=1S/C6H13NO4/c1-5(11-7(8)9)10-6(2,3)4/h5H,1-4H3	J54	2.99e-06	0.000335198	0.00019272	3.23144e-05	2.10836e-06
1290	ETBEBOOH	134.174	ETBEBO + OH	OOC(C)OC(C)(C)C	InChI=1S/C6H14O3/c1-5(9-7)8-6(2,3)4/h5,7H,1-4H3	J41	5.79e-06	0.000649096	0.000558251	1.36143e-05	6.10727e-06
1291	ETBECCHO	116.158	MTBEAO2 + CO + HO2	O=CCOC(C)(C)C	InChI=1S/C6H12O2/c1-6(2,3)8-5-4-7/h4H,5H2,1-3H3	J15	1.99e-05	0.00223092	0.00676923	5.72e-06	7.40554e-05
1292	ETBECCO3H	148.157	MTBEAO2 + OH	OOC(=O)COC(C)(C)C	InChI=1S/C6H12O4/c1-6(2,3)9-4-5(7)10-8/h8H,4H2,1-3H3	J41	5.79e-06	0.000649096	8.5369e-05	NaN	9.33937e-07
1293	ETBECNO3	163.172	ETBECO + NO2	O=N(=O)OCCOC(C)(C)C	InChI=1S/C6H13NO4/c1-6(2,3)10-4-5-11-7(8)9/h4-5H2,1-3H3	J53	1.79e-06	0.000200671	0.00019272	3.23144e-05	2.10836e-06
1294	ETBECOOH	134.174	ETBECO + OH	OOCCOC(C)(C)C	InChI=1S/C6H14O3/c1-6(2,3)8-4-5-9-7/h7H,4-5H2,1-3H3	J41	5.79e-06	0.000649096	0.000558251	1.36143e-05	6.10727e-06
1295	ETHACETOOH	120.104	ETHACETO + OH	CC(OC(=O)C)OO	InChI=1S/C4H8O4/c1-3(5)7-4(2)8-6/h4,6H,1-2H3	J41	5.79e-06	0.000649096	0.00101025	3.52709e-05	1.10521e-05
1296	ETHFORMNO3	135.076	ETHFORMO + NO2	O=COC(C)ON(=O)=O	InChI=1S/C3H5NO5/c1-3(8-2-5)9-4(6)7/h2-3H,1H3	J54	2.99e-06	0.000335198	0.0129081	0.00155763	0.000141215
1297	ETHFORMOOH	106.077	ETHFORMO + OH	CC(OC=O)OO	InChI=1S/C3H6O4/c1-3(7-5)6-2-4/h2-3,5H,1H3	J41	5.79e-06	0.000649096	0.00241	0.00231	2.63654e-05
1298	ETHO2HNO3	123.065	ETHENO3O + OH	OOCCON(=O)=O	InChI=1S/C2H5NO5/c4-3(5)7-1-2-8-6/h6H,1-2H2	J41	5.79e-06	0.000649096	0.000713213	4.35803e-05	7.80255e-06
1299	ETHOXOOH	76.0514	CHOOCH2O2 + OH	OOC1CO1	InChI=1S/C2H4O3/c3-5-2-1-4-2/h2-3H,1H2	J41	5.79e-06	0.000649096	0.000558251	1.36143e-05	6.10727e-06
1300	ETOC2NO3	135.119	ETOC2O + NO2	CCOCCON(=O)=O	InChI=1S/C4H9NO4/c1-2-8-3-4-9-5(6)7/h2-4H2,1H3	J53	1.79e-06	0.000200671	0.000191843	1.89503e-05	2.09876e-06
1301	ETOC2OOH	106.12	ETOC2O + OH	CCOCCOO	InChI=1S/C4H10O3/c1-2-6-3-4-7-5/h5H,2-4H2,1H3	J41	5.79e-06	0.000649096	0.000558251	1.36143e-05	6.10727e-06
1302	ETOLNO3	181.189	ETOLO + NO2	O=N(=O)OC(C)c1ccccc1C	InChI=1S/C9H11NO3/c1-7-5-3-4-6-9(7)8(2)13-10(11)12/h3-6,8H,1-2H3	J54	2.99e-06	0.000335198	6.8088e-05	3.23144e-05	7.44882e-07
1303	ETOLOOH	152.19	ETOLO + OH	OOC(C)c1ccccc1C	InChI=1S/C9H12O2/c1-7-5-3-4-6-9(7)8(2)11-10/h3-6,8,10H,1-2H3	J41	5.79e-06	0.000649096	0.000558251	1.36143e-05	6.10727e-06
1304	ETOMECO3H	120.104	ETOMEO2 + OH	CCOCC(=O)OO	InChI=1S/C4H8O4/c1-2-7-3-4(5)8-6/h6H,2-3H2,1H3	J41	5.79e-06	0.000649096	8.5369e-05	NaN	9.33937e-07
1305	ETOMENO3	105.093	ETOMEO + NO2	CCOCN(=O)=O	InChI=1S/C3H7NO3/c1-2-7-3-4(5)6/h2-3H2,1H3	J53	1.79e-06	0.000200671	0	NaN	0
1306	ETOMEOOH	92.0938	ETOMEO + OH	CCOCOO	InChI=1S/C3H8O3/c1-2-5-3-6-4/h4H,2-3H2,1H3	J41	5.79e-06	0.000649096	0.000558251	1.36143e-05	6.10727e-06
1307	GLYOX	58.0361	CO + CO + H2+ CO + CO + HO2 + HO2+ HCHO + CO	O=CC=O	InChI=1S/C2H2O2/c3-1-2-4/h1-2H	J31+J33+J32	9.224e-05	0.0103407	0.0145342	0.00259158	0.000159004
1308	H13C43CHO	118.131	MEKAOH + HO2 + HO2 + CO	CC(O)(CCO)C=O	InChI=1S/C5H10O3/c1-5(8,4-7)2-3-6/h4,6,8H,2-3H2,1H3	J17	5.5e-05	0.00616586	0.00165	4.27e-06	1.8051e-05
1309	H13C43CO3H	150.13	MEKAOH + HO2 + OH	OCCC(C)(O)C(=O)OO	InChI=1S/C5H10O5/c1-5(8,2-3-6)4(7)10-9/h6,8-9H,2-3H2,1H3	J41	5.79e-06	0.000649096	8.5369e-05	NaN	9.33937e-07
1310	H13CO2C3	90.0779	HOCH2CO3 + HCHO + HO2	OCC(=O)CO	InChI=1S/C3H6O3/c4-1-3(6)2-5/h4-5H,1-2H2	J22	3.98e-06	0.000446184	7.26e-05	2.23556e-05	7.94244e-07
1311	H13CO2CHO	118.088	HOCH2CHO + CO + HO2 + HO2	OC(C=O)C(=O)CO	InChI=1S/C4H6O4/c5-1-3(7)4(8)2-6/h1,3,6-7H,2H2	J15	1.99e-05	0.00223092	0.002784	0.00012201	3.0457e-05
1312	H13CO2CO3H	150.087	HOCH2COCHO + HO2 + OH	OCC(=O)C(O)C(=O)OO	InChI=1S/C4H6O6/c5-1-2(6)3(7)4(8)10-9/h3,5,7,9H,1H2	J41	5.79e-06	0.000649096	0.000537369	3.25375e-05	5.87882e-06
1313	H13M3C5OOH	150.173	H13M3C5O + OH	OCCC(C)(O)C(C)OO	InChI=1S/C6H14O4/c1-5(10-9)6(2,8)3-4-7/h5,7-9H,3-4H2,1-2H3	J41	5.79e-06	0.000649096	0.00053754	1.36143e-05	5.88069e-06
1314	H13M3CO4C5	132.158	CO2C3CHO + CH3CO3 + HO2	CC(O)(CCO)C(=O)C	InChI=1S/C6H12O3/c1-5(8)6(2,9)3-4-7/h7,9H,3-4H2,1-2H3	J22	3.98e-06	0.000446184	0.000433	0.0004314	4.73702e-06
1315	H14CO23C4	118.088	HOCH2CO3 + HOCH2CO3	OCC(=O)C(=O)CO	InChI=1S/C4H6O4/c5-1-3(7)4(8)2-6/h5-6H,1-2H2	J35	0.000268	0.0300445	0.0232179	0.0232179	0.000254004
1316	H1C23C4CHO	130.099	H1C23C4O2 + CO + HO2+ HCOCH2CO3 + HOCH2CO3	OCC(=O)C(=O)CC=O	InChI=1S/C5H6O4/c6-2-1-4(8)5(9)3-7/h2,7H,1,3H2	J15+J35	0.0002879	0.0322755	0.03565	0.034	0.000390011
1317	H1C23C4OOH	134.087	H1C23C4O + OH+ H1C23C4O + OH	OOCC(=O)C(=O)CO	InChI=1S/C4H6O5/c5-1-3(6)4(7)2-9-8/h5,8H,1-2H2	J41+J35	0.00027379	0.0306936	0.0237554	0.0232179	0.000259884
1318	H1CO23CHO	116.072	CO + CO + HOCH2CO3 + HO2+ CO + CO + HOCH2CO3 + HO2	OCC(=O)C(=O)C=O	InChI=1S/C4H4O4/c5-1-3(7)4(8)2-6/h1,6H,2H2	J34+J35	0.000393	0.0440578	0.0250979	0.0232182	0.000274571
1319	H1MC5NO3	163.172	H1MC5O + NO2	OCCC(C)C(C)ON(=O)=O	InChI=1S/C6H13NO4/c1-5(3-4-8)6(2)11-7(9)10/h5-6,8H,3-4H2,1-2H3	J54	2.99e-06	0.000335198	0.00019272	3.23144e-05	2.10836e-06
1320	H1MC5OOH	134.174	H1MC5O + OH	OCCC(C)C(C)OO	InChI=1S/C6H14O3/c1-5(3-4-7)6(2)9-8/h5-8H,3-4H2,1-2H3	J41	5.79e-06	0.000649096	0.00053754	1.36143e-05	5.88069e-06
1321	H2C3OCNO3	151.118	H2C3OCO + NO2	CC(O)COCON(=O)=O	InChI=1S/C4H9NO5/c1-4(6)2-9-3-10-5(7)8/h4,6H,2-3H2,1H3	J53	1.79e-06	0.000200671	1.09485e-05	1.89503e-05	1.19776e-07
1322	H2C3OCOOH	122.12	H2C3OCO + OH	OOCOCC(C)O	InChI=1S/C4H10O4/c1-4(5)2-7-3-8-6/h4-6H,2-3H2,1H3	J41	5.79e-06	0.000649096	0.00053754	1.36143e-05	5.88069e-06
1323	H2M2C3CHO	102.132	TBUTOLO2 + HO2 + CO	O=CCC(C)(C)O	InChI=1S/C5H10O2/c1-5(2,7)3-4-6/h4,7H,3H2,1-2H3	J15	1.99e-05	0.00223092	0.00165	4.27e-06	1.8051e-05
1324	H2M2C3CO3H	134.131	TBUTOLO2 + OH	OOC(=O)CC(C)(C)O	InChI=1S/C5H10O4/c1-5(2,7)3-4(6)9-8/h7-8H,3H2,1-2H3	J41	5.79e-06	0.000649096	8.5369e-05	NaN	9.33937e-07
1325	H2M2C4CHO	116.158	HO2M2C4O2 + HO2 + CO	O=CCCC(C)(C)O	InChI=1S/C6H12O2/c1-6(2,8)4-3-5-7/h5,8H,3-4H2,1-2H3	J15	1.99e-05	0.00223092	0.00221	5.72e-06	2.41774e-05
1326	H2M2C4CO3H	148.157	HO2M2C4O2 + OH	OOC(=O)CCC(C)(C)O	InChI=1S/C6H12O4/c1-6(2,8)4-3-5(7)10-9/h8-9H,3-4H2,1-2H3	J41	5.79e-06	0.000649096	8.5369e-05	NaN	9.33937e-07
1327	H2M2C65NO3	177.198	H2M2C65O + NO2	O=N(=O)OC(C)CCC(C)(C)O	InChI=1S/C7H15NO4/c1-6(12-8(10)11)4-5-7(2,3)9/h6,9H,4-5H2,1-3H3	J54	2.99e-06	0.000335198	0.00019272	3.23144e-05	2.10836e-06
1328	H2M2C65OOH	148.2	H2M2C65O + OH	OOC(C)CCC(C)(C)O	InChI=1S/C7H16O3/c1-6(10-9)4-5-7(2,3)8/h6,8-9H,4-5H2,1-3H3	J41	5.79e-06	0.000649096	0.00053754	1.36143e-05	5.88069e-06
1329	H2M2CO5C6	130.185	CH3CO3 + HO2M2C4O2	CC(=O)CCC(C)(C)O	InChI=1S/C7H14O2/c1-6(8)4-5-7(2,3)9/h9H,4-5H2,1-3H3	J22	3.98e-06	0.000446184	0.000288	0.000185347	3.15072e-06
1330	H2M3C4CHO	116.158	H2M3C4O2 + HO2 + CO	CC(CC=O)C(C)O	InChI=1S/C6H12O2/c1-5(3-4-7)6(2)8/h4-6,8H,3H2,1-2H3	J15	1.99e-05	0.00223092	0.00221	5.72e-06	2.41774e-05
1331	H2M3C4CO3H	148.157	H2M3C4O2 + OH	OOC(=O)CC(C)C(C)O	InChI=1S/C6H12O4/c1-4(5(2)7)3-6(8)10-9/h4-5,7,9H,3H2,1-2H3	J41	5.79e-06	0.000649096	8.5369e-05	NaN	9.33937e-07
1332	H2M3C4NO3	149.145	H2M3C4O + NO2	O=N(=O)OCC(C)C(C)O	InChI=1S/C5H11NO4/c1-4(5(2)7)3-10-6(8)9/h4-5,7H,3H2,1-2H3	J53	1.79e-06	0.000200671	0.000233945	3.89233e-06	2.55936e-06
1333	H2M3C4OOH	120.147	H2M3C4O + OH	OOCC(C)C(C)O	InChI=1S/C5H12O3/c1-4(3-8-7)5(2)6/h4-7H,3H2,1-2H3	J41	5.79e-06	0.000649096	0.00053754	1.36143e-05	5.88069e-06
1334	H2M3CO4CHO	130.142	HO2C43CO3 + HO2 + CO	CC(C(C)O)C(=O)C=O	InChI=1S/C6H10O3/c1-4(5(2)8)6(9)3-7/h3-5,8H,1-2H3	J34	0.000125	0.0140133	0.0142087	0.00046023	0.000155444
1335	H2M3CO5C6	130.185	CH3CO3 + H2M3C4O2	CC(=O)CC(C)C(C)O	InChI=1S/C7H14O2/c1-5(7(3)9)4-6(2)8/h5,7,9H,4H2,1-3H3	J22	3.98e-06	0.000446184	0.000288	0.000185347	3.15072e-06
1336	H2M4C65NO3	177.198	H2M4C65O + NO2	O=N(=O)OC(C)C(C)CC(C)O	InChI=1S/C7H15NO4/c1-5(4-6(2)9)7(3)12-8(10)11/h5-7,9H,4H2,1-3H3	J54	2.99e-06	0.000335198	0.00019272	3.23144e-05	2.10836e-06
1337	H2M4C65OOH	148.2	H2M4C65O + OH	OOC(C)C(C)CC(C)O	InChI=1S/C7H16O3/c1-5(4-6(2)8)7(3)10-9/h5-9H,4H2,1-3H3	J41	5.79e-06	0.000649096	0.00053754	1.36143e-05	5.88069e-06
1338	H2M4CO5C6	130.185	HO2C54O2 + CH3CO3	CC(O)CC(C)C(=O)C	InChI=1S/C7H14O2/c1-5(7(3)9)4-6(2)8/h5-6,8H,4H2,1-3H3	J22	3.98e-06	0.000446184	0.000288	0.000185347	3.15072e-06
1339	H2M5C65NO3	177.198	H2M5C65O + NO2	CC(O)CCC(C)(C)ON(=O)=O	InChI=1S/C7H15NO4/c1-6(9)4-5-7(2,3)12-8(10)11/h6,9H,4-5H2,1-3H3	J55	8.33e-06	0.000933847	0.00019272	3.23144e-05	2.10836e-06
1340	H2M5C65OOH	148.2	H2M5C65O + OH	OOC(C)(C)CCC(C)O	InChI=1S/C7H16O3/c1-6(8)4-5-7(2,3)10-9/h6,8-9H,4-5H2,1-3H3	J41	5.79e-06	0.000649096	0.00053754	1.36143e-05	5.88069e-06
1341	H2MC5NO3	163.172	H2MC5O + NO2	O=N(=O)OCCC(C)C(C)O	InChI=1S/C6H13NO4/c1-5(6(2)8)3-4-11-7(9)10/h5-6,8H,3-4H2,1-2H3	J54	2.99e-06	0.000335198	0.00019272	3.23144e-05	2.10836e-06
1342	H2MC5OOH	134.174	H2MC5O + OH	OOCCC(C)C(C)O	InChI=1S/C6H14O3/c1-5(6(2)7)3-4-9-8/h5-8H,3-4H2,1-2H3	J41	5.79e-06	0.000649096	0.00053754	1.36143e-05	5.88069e-06
1343	H3C25C5CHO	144.125	H3C2C4CO3 + CO + HO2	O=CC(=O)CC(O)C(=O)C	InChI=1S/C6H8O4/c1-4(8)6(10)2-5(9)3-7/h3,6,10H,2H2,1H3	J34	0.000125	0.0140133	0.003076	0.000610119	3.36514e-05
1344	H3C25C6OH	146.141	HMVKAO2 + HOCH2CO3	CC(=O)C(O)CC(=O)CO	InChI=1S/C6H10O4/c1-4(8)6(10)2-5(9)3-7/h6-7,10H,2-3H2,1H3	J22.*2	7.96e-06	0.000892368	0.000866	0.000610092	9.47404e-06
1345	H3C25C6OOH	162.141	H3C25C6O + OH+ H3C25C6O + OH	CC(=O)C(O)CC(=O)COO	InChI=1S/C6H10O5/c1-4(7)6(9)2-5(8)3-11-10/h6,9-10H,2-3H2,1H3	J41+J22.*2	1.375e-05	0.00154146	0.00140354	0.000610244	1.53547e-05
1346	H3C25CCO2H	174.151	H3C25C6O2 + HO2	OC(=O)CC(=O)CC(O)C(=O)C	InChI=1S/C7H10O5/c1-4(8)6(10)2-5(9)3-7(11)12/h6,10H,2-3H2,1H3,(H,11,12)	J22.*2	7.96e-06	0.000892368	0.000576	0.00026212	6.30144e-06
1347	H3C25CCO3H	190.151	H3C25C6O2 + OH+ H3C25C6O2 + OH	OOC(=O)CC(=O)CC(O)C(=O)C	InChI=1S/C7H10O6/c1-4(8)6(10)2-5(9)3-7(11)13-12/h6,10,12H,2-3H2,1H3	J41+J22.*2	1.375e-05	0.00154146	0.000661369	0.00026212	7.23538e-06
1348	H3C2C4CO2H	132.115	HMVKAO2 + HO2	OC(=O)CC(O)C(=O)C	InChI=1S/C5H8O4/c1-3(6)4(7)2-5(8)9/h4,7H,2H2,1H3,(H,8,9)	J22	3.98e-06	0.000446184	0.000194	7.13594e-05	2.12236e-06
1349	H3C2C4CO3H	148.114	HMVKAO2 + OH+ HMVKAO2 + OH	CC(=O)C(O)CC(=O)OO	InChI=1S/C5H8O5/c1-3(6)4(7)2-5(8)10-9/h4,7,9H,2H2,1H3	J41+J22	9.77e-06	0.00109528	0.000279369	7.13594e-05	3.0563e-06
1350	H3M2C4CO3H	148.157	ME3BU2OLO2 + OH	OOC(=O)CC(O)C(C)C	InChI=1S/C6H12O4/c1-4(2)5(7)3-6(8)10-9/h4-5,7,9H,3H2,1-2H3	J41	5.79e-06	0.000649096	8.5369e-05	NaN	9.33937e-07
1351	H3M3C4CHO	116.158	PROL11MO2 + HO2 + CO	CC(O)(CC=O)CC	InChI=1S/C6H12O2/c1-3-6(2,8)4-5-7/h5,8H,3-4H2,1-2H3	J15	1.99e-05	0.00223092	0.00221	5.72e-06	2.41774e-05
1352	H3M3C4CO3H	148.157	PROL11MO2 + OH	CC(O)(CC(=O)OO)CC	InChI=1S/C6H12O4/c1-3-6(2,8)4-5(7)10-9/h8-9H,3-4H2,1-2H3	J41	5.79e-06	0.000649096	0.000433	0.0004314	4.73702e-06
1353	H3M3C5CHO	130.185	H3M3C5O2 + HO2 + CO	CC(O)(CCC=O)CC	InChI=1S/C7H14O2/c1-3-7(2,9)5-4-6-8/h6,9H,3-5H2,1-2H3	J15	1.99e-05	0.00223092	0.00104	0.000166	1.13776e-05
1354	H3M3C5CO3H	162.184	H3M3C5O2 + OH	OOC(=O)CCC(C)(O)CC	InChI=1S/C7H14O4/c1-3-7(2,9)5-4-6(8)11-10/h9-10H,3-5H2,1-2H3	J41	5.79e-06	0.000649096	8.5369e-05	NaN	9.33937e-07
1355	H3M3C5NO3	163.172	H3M3C5O + NO2	CCC(C)(O)CCON(=O)=O	InChI=1S/C6H13NO4/c1-3-6(2,8)4-5-11-7(9)10/h8H,3-5H2,1-2H3	J53	1.79e-06	0.000200671	1.09985e-05	3.23144e-05	1.20324e-07
1356	H3M3C5OOH	134.174	H3M3C5O + OH	CC(O)(CCOO)CC	InChI=1S/C6H14O3/c1-3-6(2,7)4-5-9-8/h7-8H,3-5H2,1-2H3	J41	5.79e-06	0.000649096	0.00053754	1.36143e-05	5.88069e-06
1357	H3M3C6NO3	177.198	H3M3C6O + NO2	CCC(C)(O)CCCON(=O)=O	InChI=1S/C7H15NO4/c1-3-7(2,9)5-4-6-12-8(10)11/h9H,3-6H2,1-2H3	J53	1.79e-06	0.000200671	0.00019272	3.23144e-05	2.10836e-06
1358	H3NCO2CHO	163.086	NMGLYOX + CO + HO2 + HO2	O=CC(O)C(=O)CON(=O)=O	InChI=1S/C4H5NO6/c6-1-3(7)4(8)2-11-5(9)10/h1,3,7H,2H2	J15	1.99e-05	0.00223092	0.00636667	0.00222946	6.96513e-05
1359	HC23C4CO3H	162.097	H1C23C4O2 + OH+ H1C23C4O2 + OH	OOC(=O)CC(=O)C(=O)CO	InChI=1S/C5H6O6/c6-2-4(8)3(7)1-5(9)11-10/h6,10H,1-2H2	J41+J35	0.00027379	0.0306936	0.0340854	0.034	0.000372894
1360	HC3CCHO	86.0892	ACR + CO + HO2 + HO2	C=CC(O)C=O	InChI=1S/C4H6O2/c1-2-4(6)3-5/h2-4,6H,1H2	J15	1.99e-05	0.00223092	0.000522525	0.000115513	5.71642e-06
1361	HC3CCO3H	118.088	HO2 + ACR + OH	OC(C=C)C(=O)OO	InChI=1S/C4H6O4/c1-2-3(5)4(6)8-7/h2-3,5,7H,1H2	J41	5.79e-06	0.000649096	8.5369e-05	NaN	9.33937e-07
1362	HC3CHO	86.0892	HC3CO3 + HO2+ HOCH2CHO + HO2 + CO + HO2 + CO	OCC=CC=O	InChI=1S/C4H6O2/c5-3-1-2-4-6/h1-3,6H,4H2	J19+J18	2.2e-06	0.000246634	0.000522525	0.000115513	5.71642e-06
1363	HC3CO3H	118.088	HOCH2CHO + CO + HO2 + OH	OCC=CC(=O)OO	InChI=1S/C4H6O4/c5-3-1-2-4(6)8-7/h1-2,5,7H,3H2	J41	5.79e-06	0.000649096	8.5369e-05	NaN	9.33937e-07
1364	HC4ACHO	100.116	ACETOL + HO2 + HO2 + CO + CO+ HC4ACO3 + HO2	CC(=CC=O)CO	InChI=1S/C5H8O2/c1-5(4-7)2-3-6/h2-3,7H,4H2,1H3	J18+J19	2.2e-06	0.000246634	0.000326281	0.000277531	3.56951e-06
1365	HC4ACO3H	132.115	ACETOL + CO + HO2 + OH	OCC(=CC(=O)OO)C	InChI=1S/C5H8O4/c1-4(3-6)2-5(7)9-8/h2,6,8H,3H2,1H3	J41	5.79e-06	0.000649096	0.000334439	0.000140722	3.65876e-06
1366	HC4CCHO	100.116	CH3CO3 + HO2 + CO + HOCH2CHO+ HC4CCO3 + HO2	CC(=CCO)C=O	InChI=1S/C5H8O2/c1-5(4-7)2-3-6/h2,4,6H,3H2,1H3	J18+J19	2.2e-06	0.000246634	0.000326281	0.000277531	3.56951e-06
1367	HC4CCO3H	132.115	HOCH2CHO + CH3CO3 + OH	OCC=C(C)C(=O)OO	InChI=1S/C5H8O4/c1-4(2-3-6)5(7)9-8/h2,6,8H,3H2,1H3	J41	5.79e-06	0.000649096	8.5369e-05	NaN	9.33937e-07
1368	HC4CHO	100.116	MACR + CO + HO2 + HO2	CC(=C)C(C=O)O	InChI=1S/C5H8O2/c1-4(2)5(7)3-6/h3,5,7H,1H2,2H3	J15	1.99e-05	0.00223092	0.000326281	0.000277531	3.56951e-06
1369	HC4CO3H	132.115	MACR + HO2 + OH	CC(=C)C(C(=O)OO)O	InChI=1S/C5H8O4/c1-3(2)4(6)5(7)9-8/h4,6,8H,1H2,2H3	J41	5.79e-06	0.000649096	0.000334439	0.000140722	3.65876e-06
1370	HCHO	30.026	CO + HO2 + HO2+ H2 + CO	C=O	InChI=1S/CH2O/c1-2/h1H2	J11+J12	8.22e-05	0.00921515	0.00854	0.000486	9.34276e-05
1371	HCOC5	100.116	CH3CO3 + HCHO + HOCH2CO3	CC(=C)C(=O)CO	InChI=1S/C5H8O2/c1-4(2)5(7)3-6/h6H,1,3H2,2H3	J24	1.8e-06	0.000201792	0.000334439	0.000140722	3.65876e-06
1372	HCOCH2CHO	72.0627	HCOCH2O2 + HO2 + CO	O=CCC=O	InChI=1S/C3H4O2/c4-2-1-3-5/h2-3H,1H2	J15.*2	3.98e-05	0.00446184	0.00482	0.00326683	5.27308e-05
1373	HCOCH2CO2H	88.0621	HCOCH2O2 + HO2	O=CCC(=O)O	InChI=1S/C3H4O3/c4-2-1-3(5)6/h2H,1H2,(H,5,6)	J15	1.99e-05	0.00223092	0.00241	0.00231	2.63654e-05
1374	HCOCH2CO3H	104.061	HCOCH2O2 + OH+ HCOCH2O2 + OH	OOC(=O)CC=O	InChI=1S/C3H4O4/c4-2-1-3(5)7-6/h2,6H,1H2	J41+J15	2.569e-05	0.00288002	0.00249537	0.00231	2.72993e-05
1375	HCOCH2OOH	76.0514	HCOCH2O + OH+ HO2 + CO + HCHO + OH	OOCC=O	InChI=1S/C2H4O3/c3-1-2-5-4/h1,4H,2H2	J41+J15	2.569e-05	0.00288002	0.00114225	0.000207447	1.24962e-05
1376	HCOCO2H	74.0355	HO2 + HO2 + CO	O=CC(=O)O	InChI=1S/C2H2O3/c3-1-2(4)5/h1H,(H,4,5)	J34	0.000125	0.0140133	0.000584	0.000207	6.38896e-06
1377	HCOCO3H	90.0349	HO2 + CO + OH+ HO2 + CO + OH	OOC(=O)C=O	InChI=1S/C2H2O4/c3-1-2(4)6-5/h1,5H	J41+J15	2.569e-05	0.00288002	0.0152035	0.00259984	0.000166327
1378	HCOCOHCO3H	120.061	GLYOX + HO2 + OH	OC(C=O)C(=O)OO	InChI=1S/C3H4O5/c4-1-2(5)3(6)8-7/h1-2,5,7H	J41	5.79e-06	0.000649096	0.0025552	0.00231022	2.79539e-05
1379	HEPT3ONE	114.186	C2H5CO3 + NC4H9O2	CCCCC(=O)CC	InChI=1S/C7H14O/c1-3-5-6-7(8)4-2/h3-6H2,1-2H3	J22	3.98e-06	0.000446184	0.000288	0.000185347	3.15072e-06
1380	HEPTNO3	161.199	HEPTO + NO2	CCCCC(CC)ON(=O)=O	InChI=1S/C7H15NO3/c1-3-5-6-7(4-2)11-8(9)10/h7H,3-6H2,1-2H3	J54	2.99e-06	0.000335198	0.00019272	3.23144e-05	2.10836e-06
1381	HEPTOOH	132.201	HEPTO + OH	CCCCC(CC)OO	InChI=1S/C7H16O2/c1-3-5-6-7(4-2)9-8/h7-8H,3-6H2,1-2H3	J41	5.79e-06	0.000649096	0.000558251	1.36143e-05	6.10727e-06
1382	HEX2ONANO3	161.156	HEX2ONAO + NO2+ HEX2ONAO + NO2	CCC(CC(=O)C)ON(=O)=O	InChI=1S/C6H11NO4/c1-3-6(4-5(2)8)11-7(9)10/h6H,3-4H2,1-2H3	J22+J54	6.97e-06	0.000781382	0.00465	0.000743034	5.0871e-05
1383	HEX2ONAOOH	132.158	HEX2ONAO + OH+ HEX2ONAO + OH	CCC(OO)CC(=O)C	InChI=1S/C6H12O3/c1-3-6(9-8)4-5(2)7/h6,8H,3-4H2,1-2H3	J22+J41	9.77e-06	0.00109528	0.000991251	0.000431615	1.08443e-05
1384	HEX2ONBNO3	161.156	HEX2ONBO + NO2+ HEX2ONBO + NO2	CC(=O)CCC(C)ON(=O)=O	InChI=1S/C6H11NO4/c1-5(8)3-4-6(2)11-7(9)10/h6H,3-4H2,1-2H3	J22+J54	6.97e-06	0.000781382	0.00465	0.000743034	5.0871e-05
1385	HEX2ONBOOH	132.158	HEX2ONBO + OH+ HEX2ONBO + OH	CC(CCC(=O)C)OO	InChI=1S/C6H12O3/c1-5(7)3-4-6(2)9-8/h6,8H,3-4H2,1-2H3	J22+J41	9.77e-06	0.00109528	0.000991251	0.000431615	1.08443e-05
1386	HEX2ONCOOH	132.158	CH3CO3 + C3H7CHO + OH+ HEX2ONCO + OH	CCCC(OO)C(=O)C	InChI=1S/C6H12O3/c1-3-4-6(9-8)5(2)7/h6,8H,3-4H2,1-2H3	J22+J41	9.77e-06	0.00109528	0.000991251	0.000431615	1.08443e-05
1387	HEX2ONE	100.159	CH3CO3 + NC4H9O2	CCCCC(=O)C	InChI=1S/C6H12O/c1-3-4-5-6(2)7/h3-5H2,1-2H3	J22	3.98e-06	0.000446184	0.000433	0.0004314	4.73702e-06
1388	HEX3ONANO3	161.156	HEX3ONAO + NO2+ HEX3ONAO + NO2	CCC(=O)CC(C)ON(=O)=O	InChI=1S/C6H11NO4/c1-3-6(8)4-5(2)11-7(9)10/h5H,3-4H2,1-2H3	J53+J22	5.77e-06	0.000646854	0.00465	0.000743034	5.0871e-05
1389	HEX3ONAOH	116.158	IPROPOLO2 + C2H5CO3	CCC(=O)CC(C)O	InChI=1S/C6H12O2/c1-3-6(8)4-5(2)7/h5,7H,3-4H2,1-2H3	J22	3.98e-06	0.000446184	0.000433	0.0004314	4.73702e-06
1390	HEX3ONAOOH	132.158	HEX3ONAO + OH+ IC3H7O2 + C2H5CO3	CC(CC(=O)CC)OO	InChI=1S/C6H12O3/c1-3-6(7)4-5(2)9-8/h5,8H,3-4H2,1-2H3	J41+J22	9.77e-06	0.00109528	0.000991251	0.000431615	1.08443e-05
1391	HEX3ONBOOH	132.158	C2H5CHO + C2H5CO3 + OH+ HEX3ONBO + OH	CCC(=O)C(CC)OO	InChI=1S/C6H12O3/c1-3-5(7)6(4-2)9-8/h6,8H,3-4H2,1-2H3	J22+J41	9.77e-06	0.00109528	0.000991251	0.000431615	1.08443e-05
1392	HEX3ONCOH	116.158	C3H7CO3 + CH3CHO + HO2	CCCC(=O)C(C)O	InChI=1S/C6H12O2/c1-3-4-6(8)5(2)7/h5,7H,3-4H2,1-2H3	J22	3.98e-06	0.000446184	0.000433	0.0004314	4.73702e-06
1393	HEX3ONCOOH	132.158	CH3CHO + C3H7CO3 + OH+ HEX3ONCO + OH	CC(OO)C(=O)CCC	InChI=1S/C6H12O3/c1-3-4-6(7)5(2)9-8/h5,8H,3-4H2,1-2H3	J22+J41	9.77e-06	0.00109528	0.000991251	0.000431615	1.08443e-05
1394	HEX3ONDNO3	161.156	HEX3ONDO + NO2+ HEX3ONDO + NO2	CCC(=O)CCCON(=O)=O	InChI=1S/C6H11NO4/c1-2-6(8)4-3-5-11-7(9)10/h2-5H2,1H3	J53+J22	5.77e-06	0.000646854	0.00465	0.000743034	5.0871e-05
1395	HEX3ONDOH	116.158	HOC2H4CO3 + NC3H7O2	CCCC(=O)CCO	InChI=1S/C6H12O2/c1-2-3-6(8)4-5-7/h7H,2-5H2,1H3	J22	3.98e-06	0.000446184	0.000433	0.0004314	4.73702e-06
1396	HEX3ONDOOH	132.158	HEX3ONDO + OH+ HEX3ONDO + OH	CCCC(=O)CCOO	InChI=1S/C6H12O3/c1-2-3-6(7)4-5-9-8/h8H,2-5H2,1H3	J41+J22	9.77e-06	0.00109528	0.000991251	0.000431615	1.08443e-05
1397	HEX3ONE	100.159	C2H5CO3 + NC3H7O2	CCCC(=O)CC	InChI=1S/C6H12O/c1-3-5-6(7)4-2/h3-5H2,1-2H3	J22	3.98e-06	0.000446184	0.000433	0.0004314	4.73702e-06
1398	HEXANO3	147.172	HEXAO + NO2	CCCCCCON(=O)=O	InChI=1S/C6H13NO3/c1-2-3-4-5-6-10-7(8)9/h2-6H2,1H3	J53	1.79e-06	0.000200671	0.00019272	3.23144e-05	2.10836e-06
1399	HEXAOOH	118.174	HEXAO + OH	CCCCCCOO	InChI=1S/C6H14O2/c1-2-3-4-5-6-8-7/h7H,2-6H2,1H3	J41	5.79e-06	0.000649096	0.000558251	1.36143e-05	6.10727e-06
1400	HEXBNO3	147.172	HEXBO + NO2	CCCCC(C)ON(=O)=O	InChI=1S/C6H13NO3/c1-3-4-5-6(2)10-7(8)9/h6H,3-5H2,1-2H3	J54	2.99e-06	0.000335198	0.00019272	3.23144e-05	2.10836e-06
1401	HEXBOOH	118.174	HEXBO + OH	CC(CCCC)OO	InChI=1S/C6H14O2/c1-3-4-5-6(2)8-7/h6-7H,3-5H2,1-2H3	J41	5.79e-06	0.000649096	0.000558251	1.36143e-05	6.10727e-06
1402	HEXCNO3	147.172	HEXCO + NO2	CCCC(CC)ON(=O)=O	InChI=1S/C6H13NO3/c1-3-5-6(4-2)10-7(8)9/h6H,3-5H2,1-2H3	J54	2.99e-06	0.000335198	0.00019272	3.23144e-05	2.10836e-06
1403	HEXCOOH	118.174	HEXCO + OH	CCCC(CC)OO	InChI=1S/C6H14O2/c1-3-5-6(4-2)8-7/h6-7H,3-5H2,1-2H3	J41	5.79e-06	0.000649096	0.000558251	1.36143e-05	6.10727e-06
1404	HIEB1OOH	166.129	HIEB1O + OH+ MVKOHAOH + CO + OH + HO2	OCC(O)C(CO)(OO)C=O	InChI=1S/C5H10O6/c6-1-4(9)5(2-7,3-8)11-10/h2,4,6,8-10H,1,3H2	J41+J17	6.079e-05	0.00681495	0.00218754	1.42682e-05	2.39317e-05
1405	HIEB2OOH	166.129	HIEB2O + OH+ HMACROH + CO + OH + HO2	OOC(C=O)C(O)(CO)CO	InChI=1S/C5H10O6/c6-1-4(11-10)5(9,2-7)3-8/h1,4,7-10H,2-3H2	J41+J15	2.569e-05	0.00288002	0.00218754	1.42682e-05	2.39317e-05
1406	HM22C3CHO	116.158	HM22C3O2 + HO2 + CO	O=CCC(C)(C)CO	InChI=1S/C6H12O2/c1-6(2,5-8)3-4-7/h4,8H,3,5H2,1-2H3	J15	1.99e-05	0.00223092	0.00221	5.72e-06	2.41774e-05
1407	HM22C3CO3H	148.157	HM22C3O2 + OH	OOC(=O)CC(C)(C)CO	InChI=1S/C6H12O4/c1-6(2,4-7)3-5(8)10-9/h7,9H,3-4H2,1-2H3	J41	5.79e-06	0.000649096	8.5369e-05	NaN	9.33937e-07
1408	HM22C3NO3	149.145	HM22C3O + NO2	OCC(C)(C)CON(=O)=O	InChI=1S/C5H11NO4/c1-5(2,3-7)4-10-6(8)9/h7H,3-4H2,1-2H3	J53	1.79e-06	0.000200671	0.000233945	3.89233e-06	2.55936e-06
1409	HM22C3OOH	120.147	HM22C3O + OH	OOCC(C)(C)CO	InChI=1S/C5H12O3/c1-5(2,3-6)4-8-7/h6-7H,3-4H2,1-2H3	J41	5.79e-06	0.000649096	0.00053754	1.36143e-05	5.88069e-06
1410	HM22C4NO3	163.172	HM22C4O + NO2	OCC(C)(C)CCON(=O)=O	InChI=1S/C6H13NO4/c1-6(2,5-8)3-4-11-7(9)10/h8H,3-5H2,1-2H3	J53	1.79e-06	0.000200671	0.00019272	3.23144e-05	2.10836e-06
1411	HM22C4OOH	134.174	HM22C4O + OH	OOCCC(C)(C)CO	InChI=1S/C6H14O3/c1-6(2,5-7)3-4-9-8/h7-8H,3-5H2,1-2H3	J41	5.79e-06	0.000649096	0.00053754	1.36143e-05	5.88069e-06
1412	HM22CHO	102.132	IBUTOLBO2 + HO2 + CO	OCC(C)(C)C=O	InChI=1S/C5H10O2/c1-5(2,3-6)4-7/h3,7H,4H2,1-2H3	J17	5.5e-05	0.00616586	0.00165	4.27e-06	1.8051e-05
1413	HM22CO3H	134.131	IBUTOLBO2 + OH	OOC(=O)C(C)(C)CO	InChI=1S/C5H10O4/c1-5(2,3-6)4(7)9-8/h6,8H,3H2,1-2H3	J41	5.79e-06	0.000649096	8.5369e-05	NaN	9.33937e-07
1414	HM22COCHO	130.142	HM22CO3 + CO + HO2	O=CC(=O)C(C)(C)CO	InChI=1S/C6H10O3/c1-6(2,4-8)5(9)3-7/h3,8H,4H2,1-2H3	J34	0.000125	0.0140133	0.002643	0.000431438	2.89144e-05
1415	HM23C4NO3	163.172	HM23C4O + NO2	OCC(C)C(C)CON(=O)=O	InChI=1S/C6H13NO4/c1-5(3-8)6(2)4-11-7(9)10/h5-6,8H,3-4H2,1-2H3	J53	1.79e-06	0.000200671	0.00019272	3.23144e-05	2.10836e-06
1416	HM23C4OOH	134.174	HM23C4O + OH	OOCC(C)C(C)CO	InChI=1S/C6H14O3/c1-5(3-7)6(2)4-9-8/h5-8H,3-4H2,1-2H3	J41	5.79e-06	0.000649096	0.00053754	1.36143e-05	5.88069e-06
1417	HM2C43CHO	116.158	HM2C43O2 + HO2 + CO	OCC(C)C(C)C=O	InChI=1S/C6H12O2/c1-5(3-7)6(2)4-8/h3,5-6,8H,4H2,1-2H3	J17	5.5e-05	0.00616586	0.00221	5.72e-06	2.41774e-05
1418	HM2C43CO3H	148.157	HM2C43O2 + OH	OCC(C)C(C)C(=O)OO	InChI=1S/C6H12O4/c1-4(3-7)5(2)6(8)10-9/h4-5,7,9H,3H2,1-2H3	J41	5.79e-06	0.000649096	8.5369e-05	NaN	9.33937e-07
1419	HM2C43NO3	149.145	HM2C43O + NO2	OCC(C)C(C)ON(=O)=O	InChI=1S/C5H11NO4/c1-4(3-7)5(2)10-6(8)9/h4-5,7H,3H2,1-2H3	J54	2.99e-06	0.000335198	0.000233945	3.89233e-06	2.55936e-06
1420	HM2C43OOH	120.147	HM2C43O + OH	OCC(C)C(C)OO	InChI=1S/C5H12O3/c1-4(3-6)5(2)8-7/h4-7H,3H2,1-2H3	J41	5.79e-06	0.000649096	0.00053754	1.36143e-05	5.88069e-06
1421	HM33C3CHO	116.158	HM33C3O2 + HO2 + CO	OCCC(C)(C)C=O	InChI=1S/C6H12O2/c1-6(2,5-8)3-4-7/h5,7H,3-4H2,1-2H3	J17	5.5e-05	0.00616586	0.00221	5.72e-06	2.41774e-05
1422	HM33C3CO3H	148.157	HM33C3O2 + OH	OCCC(C)(C)C(=O)OO	InChI=1S/C6H12O4/c1-6(2,3-4-7)5(8)10-9/h7,9H,3-4H2,1-2H3	J41	5.79e-06	0.000649096	8.5369e-05	NaN	9.33937e-07
1423	HM33C3NO3	149.145	HM33C3O + NO2	OCCC(C)(C)ON(=O)=O	InChI=1S/C5H11NO4/c1-5(2,3-4-7)10-6(8)9/h7H,3-4H2,1-2H3	J55	8.33e-06	0.000933847	0.000233945	3.89233e-06	2.55936e-06
1424	HM33C3OOH	120.147	HM33C3O + OH	OCCC(C)(C)OO	InChI=1S/C5H12O3/c1-5(2,8-7)3-4-6/h6-7H,3-4H2,1-2H3	J41	5.79e-06	0.000649096	0.00053754	1.36143e-05	5.88069e-06
1425	HM33C4NO3	163.172	HM33C4O + NO2	OCCC(C)(C)CON(=O)=O	InChI=1S/C6H13NO4/c1-6(2,3-4-8)5-11-7(9)10/h8H,3-5H2,1-2H3	J53	1.79e-06	0.000200671	0.00019272	3.23144e-05	2.10836e-06
1426	HM33C4OOH	134.174	HM33C4O + OH	OCCC(C)(C)COO	InChI=1S/C6H14O3/c1-6(2,3-4-7)5-9-8/h7-8H,3-5H2,1-2H3	J41	5.79e-06	0.000649096	0.00053754	1.36143e-05	5.88069e-06
1427	HMAC	86.0892	CO + HO2 + MGLYOX + OH	OC=C(C=O)C	InChI=1S/C4H6O2/c1-4(2-5)3-6/h2-3,5H,1H3	J20.*0.5	0.000282	0.031614	0.00221444	0.000180476	2.4226e-05
1428	HMACO3H	118.088	HOCH2CO3 + HCHO + OH	OCC(=C)C(=O)OO	InChI=1S/C4H6O4/c1-3(2-5)4(6)8-7/h5,7H,1-2H2	J41	5.79e-06	0.000649096	8.5369e-05	NaN	9.33937e-07
1429	HMACROH	120.104	H13CO2C3 + CO + HO2 + HO2	OCC(O)(CO)C=O	InChI=1S/C4H8O4/c5-1-4(8,2-6)3-7/h1,6-8H,2-3H2	J17	5.5e-05	0.00616586	0.00188	0.000113	2.05672e-05
1430	HMACROOH	136.103	H13CO2C3 + CO + HO2 + OH+ HMACRO + OH	OCC(CO)(OO)C=O	InChI=1S/C4H8O5/c5-1-4(2-6,3-7)9-8/h1,6-8H,2-3H2	J17+J41	6.079e-05	0.00681495	0.00241754	0.000113817	2.64479e-05
1431	HMVKANO3	149.102	HMVKAO + NO2	O=N(=O)OCC(O)C(=O)C	InChI=1S/C4H7NO5/c1-3(6)4(7)2-10-5(8)9/h4,7H,2H2,1H3	J56.*0.91	2.8756e-05	0.00322373	0.00448667	0.0022266	4.90841e-05
1432	HMVKAOOH	120.104	HMVKAO + OH	CC(=O)C(O)COO	InChI=1S/C4H8O4/c1-3(5)4(6)2-8-7/h4,6-7H,2H2,1H3	J41	5.79e-06	0.000649096	0.00098954	3.52709e-05	1.08256e-05
1433	HMVKBCHO	116.115	HMVKBO2 + CO + HO2	OCC(C=O)C(=O)C	InChI=1S/C5H8O3/c1-4(8)5(2-6)3-7/h2,5,7H,3H2,1H3	J15	1.99e-05	0.00223092	0.002038	0.000101008	2.22957e-05
1434	HMVKBCO3H	148.114	HMVKBO2 + OH	OCC(C(=O)C)C(=O)OO	InChI=1S/C5H8O5/c1-3(7)4(2-6)5(8)10-9/h4,6,9H,2H2,1H3	J41	5.79e-06	0.000649096	0.000279369	7.13594e-05	3.0563e-06
1435	HMVKBOOH	120.104	HMVKBO + OH	OCC(OO)C(=O)C	InChI=1S/C4H8O4/c1-3(6)4(2-5)8-7/h4-5,7H,2H2,1H3	J41	5.79e-06	0.000649096	0.00098954	3.52709e-05	1.08256e-05
1436	HMVKNGLYOX	163.086	CO + CO + HOCH2CHO + NO2 + HO2	OCC(ON(=O)=O)C(=O)C=O	InChI=1S/C4H5NO6/c6-1-3(8)4(2-7)11-5(9)10/h1,4,7H,2H2	J34	0.000125	0.0140133	0.0142197	0.00046062	0.000155563
1437	HMVKNO3	165.101	HOCH2CHO + NO2 + CO + CO + HO2	OCC(=O)C(CO)ON(=O)=O	InChI=1S/C4H7NO6/c6-1-3(8)4(2-7)11-5(9)10/h4,6-7H,1-2H2	J56.*1.6	5.056e-05	0.0056681	0.00448667	0.0022266	4.90841e-05
1438	HNBIACET	163.086	NO3CH2CO3 + HOCH2CO3	OCC(=O)C(=O)CON(=O)=O	InChI=1S/C4H5NO6/c6-1-3(7)4(8)2-11-5(9)10/h6H,1-2H2	J35	0.000268	0.0300445	0.0234097	0.0232179	0.000256102
1439	HNC524CO	195.127	HOCH2CHO + HOCH2COCHO + NO2 + HO2	OCC(ON(=O)=O)C(O)(CO)C=O	InChI=1S/C5H9NO7/c7-1-4(13-6(11)12)5(10,2-8)3-9/h2,4,7,9-10H,1,3H2	J56.*4	0.0001264	0.0141703	0.0176071	0.00572939	0.000192622
1440	HNMVKOH	165.101	NO3CH2CO3 + HOCH2CHO + HO2	OCC(O)C(=O)CON(=O)=O	InChI=1S/C4H7NO6/c6-1-3(7)4(8)2-11-5(9)10/h3,6-7H,1-2H2	J22	3.98e-06	0.000446184	0.00448667	0.0022266	4.90841e-05
1441	HNMVKOOH	181.101	HNMVKO + OH+ NO3CH2CO3 + HOCH2CHO + OH	OCC(OO)C(=O)CON(=O)=O	InChI=1S/C4H7NO7/c6-1-4(12-10)3(7)2-11-5(8)9/h4,6,10H,1-2H2	J41+J22	9.77e-06	0.00109528	0.00502421	0.00222664	5.49648e-05
1442	HO12CO3C4	104.105	CH3CO3 + HOCH2CHO + HO2	CC(=O)C(O)CO	InChI=1S/C4H8O3/c1-3(6)4(7)2-5/h4-5,7H,2H2,1H3	J22	3.98e-06	0.000446184	0.000452	3.25375e-05	4.94488e-06
1443	HO13C3CHO	104.105	HOC2H4CHO + CO + HO2 + HO2	OC(CCO)C=O	InChI=1S/C4H8O3/c5-2-1-4(7)3-6/h3-5,7H,1-2H2	J15	1.99e-05	0.00223092	0.00188	0.000113	2.05672e-05
1444	HO13C3CO3H	136.103	HOC2H4CHO + HO2 + OH	OCCC(O)C(=O)OO	InChI=1S/C4H8O5/c5-2-1-3(6)4(7)9-8/h3,5-6,8H,1-2H2	J41	5.79e-06	0.000649096	8.5369e-05	NaN	9.33937e-07
1445	HO13C4OOH	122.12	HO13C4O + OH	OCCC(O)COO	InChI=1S/C4H10O4/c5-2-1-4(6)3-8-7/h4-7H,1-3H2	J41	5.79e-06	0.000649096	0.00053754	1.36143e-05	5.88069e-06
1446	HO13C5NO3	165.144	HO13C5O + NO2	OCCC(O)C(C)ON(=O)=O	InChI=1S/C5H11NO5/c1-4(11-6(9)10)5(8)2-3-7/h4-5,7-8H,2-3H2,1H3	J53	1.79e-06	0.000200671	1.33512e-05	3.89233e-06	1.46063e-07
1447	HO13C5OOH	136.146	HO13C5O + OH	OCCC(O)C(C)OO	InChI=1S/C5H12O4/c1-4(9-8)5(7)2-3-6/h4-8H,2-3H2,1H3	J41	5.79e-06	0.000649096	0.00053754	1.36143e-05	5.88069e-06
1448	HO13CO4C5	118.131	CH3CO3 + HOC2H4CHO + HO2	CC(=O)C(O)CCO	InChI=1S/C5H10O3/c1-4(7)5(8)2-3-6/h5-6,8H,2-3H2,1H3	J22	3.98e-06	0.000446184	0.000194	7.13594e-05	2.12236e-06
1449	HO14CO2C4	104.105	HOCH2CO3 + HOCH2CH2O2	OCCC(=O)CO	InChI=1S/C4H8O3/c5-2-1-4(7)3-6/h5-6H,1-3H2	J22	3.98e-06	0.000446184	0.000452	3.25375e-05	4.94488e-06
1450	HO14CO2C5	118.131	IPROPOLO2 + HOCH2CO3	OCC(=O)CC(C)O	InChI=1S/C5H10O3/c1-4(7)2-5(8)3-6/h4,6-7H,2-3H2,1H3	J22	3.98e-06	0.000446184	0.000194	7.13594e-05	2.12236e-06
1451	HO14CO3C5	118.131	CH3CHO + HOC2H4CO3	OCCC(=O)C(C)O	InChI=1S/C5H10O3/c1-4(7)5(8)2-3-6/h4,6-7H,2-3H2,1H3	J22	3.98e-06	0.000446184	0.000194	7.13594e-05	2.12236e-06
1452	HO1C3NO3	121.092	HO1C3O + NO2	OCCCON(=O)=O	InChI=1S/C3H7NO4/c5-2-1-3-8-4(6)7/h5H,1-3H2	J53	1.79e-06	0.000200671	0.000190129	3.66408e-05	2.08001e-06
1453	HO1C3OOH	92.0938	HO1C3O + OH	OCCCOO	InChI=1S/C3H8O3/c4-2-1-3-6-5/h4-5H,1-3H2	J41	5.79e-06	0.000649096	0.00053754	1.36143e-05	5.88069e-06
1454	HO1C4NO3	135.119	HO1C4O + NO2	OCCCCON(=O)=O	InChI=1S/C4H9NO4/c6-3-1-2-4-9-5(7)8/h6H,1-4H2	J53	1.79e-06	0.000200671	0.000191843	1.89503e-05	2.09876e-06
1455	HO1C4OOH	106.12	HO1C4O + OH	OCCCCOO	InChI=1S/C4H10O3/c5-3-1-2-4-7-6/h5-6H,1-4H2	J41	5.79e-06	0.000649096	0.00053754	1.36143e-05	5.88069e-06
1456	HO1C5NO3	149.145	HO1C5O + NO2	OCCCC(C)ON(=O)=O	InChI=1S/C5H11NO4/c1-5(3-2-4-7)10-6(8)9/h5,7H,2-4H2,1H3	J53	1.79e-06	0.000200671	0.000233945	3.89233e-06	2.55936e-06
1457	HO1C5OOH	120.147	HO1C5O + OH	OCCCC(C)OO	InChI=1S/C5H12O3/c1-5(8-7)3-2-4-6/h5-7H,2-4H2,1H3	J41	5.79e-06	0.000649096	0.00053754	1.36143e-05	5.88069e-06
1458	HO1C6NO3	163.172	HO1C6O + NO2	OCCCC(CC)ON(=O)=O	InChI=1S/C6H13NO4/c1-2-6(4-3-5-8)11-7(9)10/h6,8H,2-5H2,1H3	J54	2.99e-06	0.000335198	0.00019272	3.23144e-05	2.10836e-06
1459	HO1C6OOH	134.174	HO1C6O + OH	OCCCC(CC)OO	InChI=1S/C6H14O3/c1-2-6(9-8)4-3-5-7/h6-8H,2-5H2,1H3	J41	5.79e-06	0.000649096	0.00053754	1.36143e-05	5.88069e-06
1460	HO1CO24C5	116.115	CH3COCH2O2 + HOCH2CO3	CC(=O)CC(=O)CO	InChI=1S/C5H8O3/c1-4(7)2-5(8)3-6/h6H,2-3H2,1H3	J22.*2	7.96e-06	0.000892368	0.000388	0.000100917	4.24472e-06
1461	HO1CO24C6	130.142	HOCH2CO3 + MEKCO2	CCC(=O)CC(=O)CO	InChI=1S/C6H10O3/c1-2-5(8)3-6(9)4-7/h7H,2-4H2,1H3	J22.*2	7.96e-06	0.000892368	0.000866	0.000610092	9.47404e-06
1462	HO1CO34C5	116.115	CH3CO3 + HOC2H4CO3	CC(=O)C(=O)CCO	InChI=1S/C5H8O3/c1-4(7)5(8)2-3-6/h6H,2-3H2,1H3	J35	0.000268	0.0300445	0.034	0.034	0.00037196
1463	HO1CO3C5	102.132	C2H5CO3 + HOCH2CH2O2	OCCC(=O)CC	InChI=1S/C5H10O2/c1-2-5(7)3-4-6/h6H,2-4H2,1H3	J22	3.98e-06	0.000446184	0.000194	7.13594e-05	2.12236e-06
1464	HO1CO3CHO	102.089	HOC2H4CO3 + HO2 + CO	OCCC(=O)C=O	InChI=1S/C4H6O3/c5-2-1-4(7)3-6/h3,5H,1-2H2	J34	0.000125	0.0140133	0.0142087	0.00046023	0.000155444
1465	HO1CO4C6	116.158	C2H5CO3 + HO1C3O2+ C2H5O2 + HOC3H6CO3	OCCCC(=O)CC	InChI=1S/C6H12O2/c1-2-6(8)4-3-5-7/h7H,2-5H2,1H3	J22.*0.5+J22.*0.5	3.98e-06	0.000446184	0.000433	0.0004314	4.73702e-06
1466	HO1MC5NO3	163.172	HO1MC5O + NO2	OCC(C)CC(C)ON(=O)=O	InChI=1S/C6H13NO4/c1-5(4-8)3-6(2)11-7(9)10/h5-6,8H,3-4H2,1-2H3	J54	2.99e-06	0.000335198	0.00019272	3.23144e-05	2.10836e-06
1467	HO1MC5OOH	134.174	HO1MC5O + OH	OCC(C)CC(C)OO	InChI=1S/C6H14O3/c1-5(4-7)3-6(2)9-8/h5-8H,3-4H2,1-2H3	J41	5.79e-06	0.000649096	0.00053754	1.36143e-05	5.88069e-06
1468	HO24C4CHO	118.131	HO2C3CHO + HO2 + HO2 + CO	CC(O)CC(O)C=O	InChI=1S/C5H10O3/c1-4(7)2-5(8)3-6/h3-5,7-8H,2H2,1H3	J15	1.99e-05	0.00223092	0.00165	4.27e-06	1.8051e-05
1469	HO24C4CO3H	150.13	HO2C3CHO + HO2 + OH	OOC(=O)C(O)CC(C)O	InChI=1S/C5H10O5/c1-3(6)2-4(7)5(8)10-9/h3-4,6-7,9H,2H2,1H3	J41	5.79e-06	0.000649096	8.5369e-05	NaN	9.33937e-07
1470	HO24C5OOH	136.146	HO24C5O + OH	OOCC(O)CC(C)O	InChI=1S/C5H12O4/c1-4(6)2-5(7)3-9-8/h4-8H,2-3H2,1H3	J41	5.79e-06	0.000649096	0.00053754	1.36143e-05	5.88069e-06
1471	HO2C3CHO	88.1051	HO2 + CO + IPROPOLO2	CC(O)CC=O	InChI=1S/C4H8O2/c1-4(6)2-3-5/h3-4,6H,2H2,1H3	J15	1.99e-05	0.00223092	0.00188	0.000113	2.05672e-05
1472	HO2C3CO3H	120.104	IPROPOLO2 + OH	OOC(=O)CC(C)O	InChI=1S/C4H8O4/c1-3(5)2-4(6)8-7/h3,5,7H,2H2,1H3	J41	5.79e-06	0.000649096	8.5369e-05	NaN	9.33937e-07
1473	HO2C43CHO	102.132	BUT2OLO2 + HO2 + CO	CC(C=O)C(C)O	InChI=1S/C5H10O2/c1-4(3-6)5(2)7/h3-5,7H,1-2H3	J17	5.5e-05	0.00616586	0.001844	7.1487e-05	2.01734e-05
1474	HO2C43CO3H	134.131	BUT2OLO2 + OH	OOC(=O)C(C)C(C)O	InChI=1S/C5H10O4/c1-3(4(2)6)5(7)9-8/h3-4,6,8H,1-2H3	J41	5.79e-06	0.000649096	8.5369e-05	NaN	9.33937e-07
1475	HO2C4CHO	102.132	HO2C4O2 + HO2 + CO	O=CCCC(C)O	InChI=1S/C5H10O2/c1-5(7)3-2-4-6/h4-5,7H,2-3H2,1H3	J15	1.99e-05	0.00223092	0.00165	4.27e-06	1.8051e-05
1476	HO2C4CO3H	134.131	HO2C4O2 + OH	OOC(=O)CCC(C)O	InChI=1S/C5H10O4/c1-4(6)2-3-5(7)9-8/h4,6,8H,2-3H2,1H3	J41	5.79e-06	0.000649096	8.5369e-05	NaN	9.33937e-07
1477	HO2C4NO3	135.119	HO2C4O + NO2	CC(O)CCON(=O)=O	InChI=1S/C4H9NO4/c1-4(6)2-3-9-5(7)8/h4,6H,2-3H2,1H3	J53	1.79e-06	0.000200671	1.09485e-05	1.89503e-05	1.19776e-07
1478	HO2C4OOH	106.12	HO2C4O + OH	OOCCC(C)O	InChI=1S/C4H10O3/c1-4(5)2-3-7-6/h4-6H,2-3H2,1H3	J41	5.79e-06	0.000649096	0.00053754	1.36143e-05	5.88069e-06
1479	HO2C54CHO	116.158	HO2C54O2 + HO2 + CO	CC(CC(C)O)C=O	InChI=1S/C6H12O2/c1-5(4-7)3-6(2)8/h4-6,8H,3H2,1-2H3	J17	5.5e-05	0.00616586	0.00221	5.72e-06	2.41774e-05
1480	HO2C54CO3H	148.157	HO2C54O2 + OH	OOC(=O)C(C)CC(C)O	InChI=1S/C6H12O4/c1-4(3-5(2)7)6(8)10-9/h4-5,7,9H,3H2,1-2H3	J41	5.79e-06	0.000649096	8.5369e-05	NaN	9.33937e-07
1481	HO2C54NO3	149.145	HO2C54O + NO2	CC(O)CC(C)ON(=O)=O	InChI=1S/C5H11NO4/c1-4(7)3-5(2)10-6(8)9/h4-5,7H,3H2,1-2H3	J54	2.99e-06	0.000335198	0.000233945	3.89233e-06	2.55936e-06
1482	HO2C54OOH	120.147	HO2C54O + OH	OOC(C)CC(C)O	InChI=1S/C5H12O3/c1-4(6)3-5(2)8-7/h4-7H,3H2,1-2H3	J41	5.79e-06	0.000649096	0.00053754	1.36143e-05	5.88069e-06
1483	HO2C5NO3	149.145	HO2C5O + NO2	CC(O)CCCON(=O)=O	InChI=1S/C5H11NO4/c1-5(7)3-2-4-10-6(8)9/h5,7H,2-4H2,1H3	J54	2.99e-06	0.000335198	0.000233945	3.89233e-06	2.55936e-06
1484	HO2C5OOH	120.147	HO2C5O + OH	OOCCCC(C)O	InChI=1S/C5H12O3/c1-5(6)3-2-4-8-7/h5-7H,2-4H2,1H3	J41	5.79e-06	0.000649096	0.00053754	1.36143e-05	5.88069e-06
1485	HO2C6NO3	163.172	HO2C6O + NO2	CC(O)CCC(C)ON(=O)=O	InChI=1S/C6H13NO4/c1-5(8)3-4-6(2)11-7(9)10/h5-6,8H,3-4H2,1-2H3	J54	2.99e-06	0.000335198	0.00019272	3.23144e-05	2.10836e-06
1486	HO2C6OOH	134.174	HO2C6O + OH	OOC(C)CCC(C)O	InChI=1S/C6H14O3/c1-5(7)3-4-6(2)9-8/h5-8H,3-4H2,1-2H3	J41	5.79e-06	0.000649096	0.00053754	1.36143e-05	5.88069e-06
1487	HO2CO35C7	144.168	CO3C4CO3 + CH3CHO + HO2	CCC(=O)CC(=O)C(C)O	InChI=1S/C7H12O3/c1-3-6(9)4-7(10)5(2)8/h5,8H,3-4H2,1-2H3	J22.*2	7.96e-06	0.000892368	0.000576	0.00026212	6.30144e-06
1488	HO2CO4C5	102.132	IPROPOLO2 + CH3CO3	CC(O)CC(=O)C	InChI=1S/C5H10O2/c1-4(6)3-5(2)7/h4,6H,3H2,1-2H3	J22	3.98e-06	0.000446184	0.000194	7.13594e-05	2.12236e-06
1489	HO2CO4CHO	116.115	HO2C3CO3 + HO2 + CO	CC(O)CC(=O)C=O	InChI=1S/C5H8O3/c1-4(7)2-5(8)3-6/h3-4,7H,2H2,1H3	J34	0.000125	0.0140133	0.0142087	0.00046023	0.000155444
1490	HO2CO5C6	116.158	CH3CO3 + HO2C4O2	CC(O)CCC(=O)C	InChI=1S/C6H12O2/c1-5(7)3-4-6(2)8/h5,7H,3-4H2,1-2H3	J22	3.98e-06	0.000446184	0.000433	0.0004314	4.73702e-06
1491	HO2CO5C7	130.185	C2H5CO3 + HO2C4O2	CCC(=O)CCC(C)O	InChI=1S/C7H14O2/c1-3-7(9)5-4-6(2)8/h6,8H,3-5H2,1-2H3	J22	3.98e-06	0.000446184	0.000288	0.000185347	3.15072e-06
1492	HO2M2C4NO3	149.145	HO2M2C4O + NO2	O=N(=O)OCCC(C)(C)O	InChI=1S/C5H11NO4/c1-5(2,7)3-4-10-6(8)9/h7H,3-4H2,1-2H3	J53	1.79e-06	0.000200671	0.000233945	3.89233e-06	2.55936e-06
1493	HO2M2C4OOH	120.147	HO2M2C4O + OH	OOCCC(C)(C)O	InChI=1S/C5H12O3/c1-5(2,6)3-4-8-7/h6-7H,3-4H2,1-2H3	J41	5.79e-06	0.000649096	0.00053754	1.36143e-05	5.88069e-06
1494	HO2M2C5NO3	163.172	HO2M2C5O + NO2	O=N(=O)OCCCC(C)(C)O	InChI=1S/C6H13NO4/c1-6(2,8)4-3-5-11-7(9)10/h8H,3-5H2,1-2H3	J53	1.79e-06	0.000200671	0.00019272	3.23144e-05	2.10836e-06
1495	HO2M2C5OOH	134.174	HO2M2C5O + OH	OOCCCC(C)(C)O	InChI=1S/C6H14O3/c1-6(2,7)4-3-5-9-8/h7-8H,3-5H2,1-2H3	J41	5.79e-06	0.000649096	0.00053754	1.36143e-05	5.88069e-06
1496	HO2MC5NO3	163.172	HO2MC5O + NO2	CC(O)CC(C)CON(=O)=O	InChI=1S/C6H13NO4/c1-5(3-6(2)8)4-11-7(9)10/h5-6,8H,3-4H2,1-2H3	J53	1.79e-06	0.000200671	0.00019272	3.23144e-05	2.10836e-06
1497	HO2MC5OOH	134.174	HO2MC5O + OH	OOCC(C)CC(C)O	InChI=1S/C6H14O3/c1-5(4-9-8)3-6(2)7/h5-8H,3-4H2,1-2H3	J41	5.79e-06	0.000649096	0.00053754	1.36143e-05	5.88069e-06
1498	HO34CO6C8	160.211	C82O + HO2	CCC(=O)CC(O)C(O)CC	InChI=1S/C8H16O3/c1-3-6(9)5-8(11)7(10)4-2/h7-8,10-11H,3-5H2,1-2H3	J22	3.98e-06	0.000446184	0.000288	0.000185347	3.15072e-06
1499	HO3C106NO3	219.278	HO3C106O + NO2	CCCCC(CCC(O)CC)ON(=O)=O	InChI=1S/C10H21NO4/c1-3-5-6-10(15-11(13)14)8-7-9(12)4-2/h9-10,12H,3-8H2,1-2H3	J54	2.99e-06	0.000335198	1.09985e-05	3.23144e-05	1.20324e-07
1500	HO3C106OOH	190.28	HO3C106O + OH	CCCCC(OO)CCC(O)CC	InChI=1S/C10H22O3/c1-3-5-6-10(13-12)8-7-9(11)4-2/h9-12H,3-8H2,1-2H3	J41	5.79e-06	0.000649096	0.00053754	1.36143e-05	5.88069e-06
1501	HO3C116NO3	233.305	HO3C116O + NO2	CCCCCC(CCC(O)CC)ON(=O)=O	InChI=1S/C11H23NO4/c1-3-5-6-7-11(16-12(14)15)9-8-10(13)4-2/h10-11,13H,3-9H2,1-2H3	J54	2.99e-06	0.000335198	1.09985e-05	3.23144e-05	1.20324e-07
1502	HO3C116OOH	204.306	HO3C116O + OH	CCCCCC(OO)CCC(O)CC	InChI=1S/C11H24O3/c1-3-5-6-7-11(14-13)9-8-10(12)4-2/h10-13H,3-9H2,1-2H3	J41	5.79e-06	0.000649096	0.00053754	1.36143e-05	5.88069e-06
1503	HO3C126NO3	247.331	HO3C126O + NO2	CCCCCCC(CCC(O)CC)ON(=O)=O	InChI=1S/C12H25NO4/c1-3-5-6-7-8-12(17-13(15)16)10-9-11(14)4-2/h11-12,14H,3-10H2,1-2H3	J54	2.99e-06	0.000335198	1.09985e-05	3.23144e-05	1.20324e-07
1504	HO3C126OOH	218.333	HO3C126O + OH	CCCCCCC(OO)CCC(O)CC	InChI=1S/C12H26O3/c1-3-5-6-7-8-12(15-14)10-9-11(13)4-2/h11-14H,3-10H2,1-2H3	J41	5.79e-06	0.000649096	0.00053754	1.36143e-05	5.88069e-06
1505	HO3C3CHO	88.1051	C2H5CHO + HCHO + HO2	CCC(O)C=O	InChI=1S/C4H8O2/c1-2-4(6)3-5/h3-4,6H,2H2,1H3	J15	1.99e-05	0.00223092	0.00188	0.000113	2.05672e-05
1506	HO3C3CO3H	120.104	C2H5CHO + HO2 + OH	CCC(O)C(=O)OO	InChI=1S/C4H8O4/c1-2-3(5)4(6)8-7/h3,5,7H,2H2,1H3	J41	5.79e-06	0.000649096	8.5369e-05	NaN	9.33937e-07
1507	HO3C4CHO	102.132	HO3C4O2 + HO2 + CO	CCC(O)CC=O	InChI=1S/C5H10O2/c1-2-5(7)3-4-6/h4-5,7H,2-3H2,1H3	J15	1.99e-05	0.00223092	0.00165	4.27e-06	1.8051e-05
1508	HO3C4CO3H	134.131	HO3C4O2 + OH	CCC(O)CC(=O)OO	InChI=1S/C5H10O4/c1-2-4(6)3-5(7)9-8/h4,6,8H,2-3H2,1H3	J41	5.79e-06	0.000649096	8.5369e-05	NaN	9.33937e-07
1509	HO3C4OOH	106.12	HO3C4O + OH	CCC(O)COO	InChI=1S/C4H10O3/c1-2-4(5)3-7-6/h4-6H,2-3H2,1H3	J41	5.79e-06	0.000649096	0.00053754	1.36143e-05	5.88069e-06
1510	HO3C5CHO	116.158	HO3C5O2 + HO2 + CO	CCC(O)CCC=O	InChI=1S/C6H12O2/c1-2-6(8)4-3-5-7/h5-6,8H,2-4H2,1H3	J15	1.99e-05	0.00223092	0.00221	5.72e-06	2.41774e-05
1511	HO3C5CO3H	148.157	HO3C5O2 + OH	CCC(O)CCC(=O)OO	InChI=1S/C6H12O4/c1-2-5(7)3-4-6(8)10-9/h5,7,9H,2-4H2,1H3	J41	5.79e-06	0.000649096	8.5369e-05	NaN	9.33937e-07
1512	HO3C5NO3	149.145	HO3C5O + NO2	CCC(O)CCON(=O)=O	InChI=1S/C5H11NO4/c1-2-5(7)3-4-10-6(8)9/h5,7H,2-4H2,1H3	J53	1.79e-06	0.000200671	1.33512e-05	3.89233e-06	1.46063e-07
1513	HO3C5OOH	120.147	HO3C5O + OH	CCC(O)CCOO	InChI=1S/C5H12O3/c1-2-5(6)3-4-8-7/h5-7H,2-4H2,1H3	J41	5.79e-06	0.000649096	0.00053754	1.36143e-05	5.88069e-06
1514	HO3C6NO3	163.172	HO3C6O + NO2	CCC(O)CCCON(=O)=O	InChI=1S/C6H13NO4/c1-2-6(8)4-3-5-11-7(9)10/h6,8H,2-5H2,1H3	J54	2.99e-06	0.000335198	0.00019272	3.23144e-05	2.10836e-06
1515	HO3C6OOH	134.174	HO3C6O + OH	OOCCCC(O)CC	InChI=1S/C6H14O3/c1-2-6(7)4-3-5-9-8/h6-8H,2-5H2,1H3	J41	5.79e-06	0.000649096	0.00053754	1.36143e-05	5.88069e-06
1516	HO3C76NO3	177.198	HO3C76O + NO2	CCC(O)CCC(C)ON(=O)=O	InChI=1S/C7H15NO4/c1-3-7(9)5-4-6(2)12-8(10)11/h6-7,9H,3-5H2,1-2H3	J54	2.99e-06	0.000335198	0.00019272	3.23144e-05	2.10836e-06
1517	HO3C76OOH	148.2	HO3C76O + OH	CCC(O)CCC(C)OO	InChI=1S/C7H16O3/c1-3-7(8)5-4-6(2)10-9/h6-9H,3-5H2,1-2H3	J41	5.79e-06	0.000649096	0.00053754	1.36143e-05	5.88069e-06
1518	HO3C86NO3	191.225	HO3C86O + NO2	CCC(O)CCC(CC)ON(=O)=O	InChI=1S/C8H17NO4/c1-3-7(10)5-6-8(4-2)13-9(11)12/h7-8,10H,3-6H2,1-2H3	J54	2.99e-06	0.000335198	0.00019272	3.23144e-05	2.10836e-06
1519	HO3C86OOH	162.227	HO3C86O + OH	CCC(O)CCC(CC)OO	InChI=1S/C8H18O3/c1-3-7(9)5-6-8(4-2)11-10/h7-10H,3-6H2,1-2H3	J41	5.79e-06	0.000649096	0.00053754	1.36143e-05	5.88069e-06
1520	HO3C96NO3	205.251	HO3C96O + NO2	CCCC(CCC(O)CC)ON(=O)=O	InChI=1S/C9H19NO4/c1-3-5-9(14-10(12)13)7-6-8(11)4-2/h8-9,11H,3-7H2,1-2H3	J54	2.99e-06	0.000335198	1.09985e-05	3.23144e-05	1.20324e-07
1521	HO3C96OOH	176.253	HO3C96O + OH	CCCC(OO)CCC(O)CC	InChI=1S/C9H20O3/c1-3-5-9(12-11)7-6-8(10)4-2/h8-11H,3-7H2,1-2H3	J41	5.79e-06	0.000649096	0.00053754	1.36143e-05	5.88069e-06
1522	HO3CO46C8	158.195	CO3C4CO3 + C2H5CHO + HO2	CCC(=O)CC(=O)C(O)CC	InChI=1S/C8H14O3/c1-3-6(9)5-8(11)7(10)4-2/h7,10H,3-5H2,1-2H3	J22.*2	7.96e-06	0.000892368	0.000576	0.00026212	6.30144e-06
1523	HO3CO6C7	130.185	HO3C5O2 + CH3CO3	CCC(O)CCC(=O)C	InChI=1S/C7H14O2/c1-3-7(9)5-4-6(2)8/h7,9H,3-5H2,1-2H3	J22	3.98e-06	0.000446184	0.000288	0.000185347	3.15072e-06
1524	HO3CO6C8	144.211	C2H5CO3 + HO3C5O2	CCC(O)CCC(=O)CC	InChI=1S/C8H16O2/c1-3-7(9)5-6-8(10)4-2/h7,9H,3-6H2,1-2H3	J22	3.98e-06	0.000446184	0.000288	0.000185347	3.15072e-06
1525	HO4C5CO3H	148.157	PE1ENEBO2 + OH	CCCC(O)CC(=O)OO	InChI=1S/C6H12O4/c1-2-3-5(7)4-6(8)10-9/h5,7,9H,2-4H2,1H3	J41	5.79e-06	0.000649096	8.5369e-05	NaN	9.33937e-07
1526	HO4CO7C9	158.238	C2H5CO3 + HO5C6O2	CCCC(O)CCC(=O)CC	InChI=1S/C9H18O2/c1-3-5-9(11)7-6-8(10)4-2/h9,11H,3-7H2,1-2H3	J22	3.98e-06	0.000446184	0.000288	0.000185347	3.15072e-06
1527	HO5C5CHO	116.158	HO2 + CO + C4H9CHO + HO2	CCCCC(O)C=O	InChI=1S/C6H12O2/c1-2-3-4-6(8)5-7/h5-6,8H,2-4H2,1H3	J15	1.99e-05	0.00223092	0.00221	5.72e-06	2.41774e-05
1528	HO5C5CO3H	148.157	C4H9CHO + HO2 + OH	CCCCC(O)C(=O)OO	InChI=1S/C6H12O4/c1-2-3-4-5(7)6(8)10-9/h5,7,9H,2-4H2,1H3	J41	5.79e-06	0.000649096	8.5369e-05	NaN	9.33937e-07
1529	HO5C6CO3H	162.184	HO5C6O2 + OH	CCCCC(O)CC(=O)OO	InChI=1S/C7H14O4/c1-2-3-4-6(8)5-7(9)11-10/h6,8,10H,2-5H2,1H3	J41	5.79e-06	0.000649096	8.5369e-05	NaN	9.33937e-07
1530	HO5C6OOH	134.174	HO5C6O + OH	CCCCC(O)COO	InChI=1S/C6H14O3/c1-2-3-4-6(7)5-9-8/h6-8H,2-5H2,1H3	J41	5.79e-06	0.000649096	0.00053754	1.36143e-05	5.88069e-06
1531	HO5CO8C10	172.265	C2H5CO3 + HO6C7O2	CCCCC(O)CCC(=O)CC	InChI=1S/C10H20O2/c1-3-5-6-10(12)8-7-9(11)4-2/h10,12H,3-8H2,1-2H3	J22	3.98e-06	0.000446184	0.000288	0.000185347	3.15072e-06
1532	HO6C7CO3H	176.21	HO6C7O2 + OH	CCCCCC(O)CC(=O)OO	InChI=1S/C8H16O4/c1-2-3-4-5-7(9)6-8(10)12-11/h7,9,11H,2-6H2,1H3	J41	5.79e-06	0.000649096	8.5369e-05	NaN	9.33937e-07
1533	HO6C7OOH	148.2	HO6C7O + OH	CCCCCC(O)COO	InChI=1S/C7H16O3/c1-2-3-4-5-7(8)6-10-9/h7-9H,2-6H2,1H3	J41	5.79e-06	0.000649096	0.00053754	1.36143e-05	5.88069e-06
1534	HO6CO9C11	186.291	C2H5CO3 + HO7C8O2	CCCCCC(O)CCC(=O)CC	InChI=1S/C11H22O2/c1-3-5-6-7-11(13)9-8-10(12)4-2/h11,13H,3-9H2,1-2H3	J22	3.98e-06	0.000446184	0.000288	0.000185347	3.15072e-06
1535	HO7C8CO3H	190.237	HO7C8O2 + OH	CCCCCCC(O)CC(=O)OO	InChI=1S/C9H18O4/c1-2-3-4-5-6-8(10)7-9(11)13-12/h8,10,12H,2-7H2,1H3	J41	5.79e-06	0.000649096	8.5369e-05	NaN	9.33937e-07
1536	HO7C8OOH	162.227	HO7C8O + OH	CCCCCCC(O)COO	InChI=1S/C8H18O3/c1-2-3-4-5-6-8(9)7-11-10/h8-10H,2-7H2,1H3	J41	5.79e-06	0.000649096	0.00053754	1.36143e-05	5.88069e-06
1537	HO7CO10C12	200.318	C2H5CO3 + HO8C9O2	CCCCCCC(O)CCC(=O)CC	InChI=1S/C12H24O2/c1-3-5-6-7-8-12(14)10-9-11(13)4-2/h12,14H,3-10H2,1-2H3	J22	3.98e-06	0.000446184	0.000288	0.000185347	3.15072e-06
1538	HO8C9CO3H	204.263	HO8C9O2 + OH	CCCCCCCC(O)CC(=O)OO	InChI=1S/C10H20O4/c1-2-3-4-5-6-7-9(11)8-10(12)14-13/h9,11,13H,2-8H2,1H3	J41	5.79e-06	0.000649096	8.5369e-05	NaN	9.33937e-07
1539	HO8C9OOH	176.253	HO8C9O + OH	CCCCCCCC(O)COO	InChI=1S/C9H20O3/c1-2-3-4-5-6-7-9(10)8-12-11/h9-11H,2-8H2,1H3	J41	5.79e-06	0.000649096	0.00053754	1.36143e-05	5.88069e-06
1540	HOACETEOOH	136.103	HOACETETO + OH	OOC(C)OC(=O)CO	InChI=1S/C4H8O5/c1-3(9-7)8-4(6)2-5/h3,5,7H,2H2,1H3	J41	5.79e-06	0.000649096	0.00098954	3.52709e-05	1.08256e-05
1541	HOBUT2CHO	102.132	NBUTOLBO2 + HO2 + CO	CC(CCO)C=O	InChI=1S/C5H10O2/c1-5(4-7)2-3-6/h4-6H,2-3H2,1H3	J17	5.5e-05	0.00616586	0.00165	4.27e-06	1.8051e-05
1542	HOBUT2CO3H	134.131	NBUTOLBO2 + OH	OCCC(C)C(=O)OO	InChI=1S/C5H10O4/c1-4(2-3-6)5(7)9-8/h4,6,8H,2-3H2,1H3	J41	5.79e-06	0.000649096	8.5369e-05	NaN	9.33937e-07
1543	HOC2H4CHO	74.0785	HOCH2CH2O2 + HO2 + CO	OCCC=O	InChI=1S/C3H6O2/c4-2-1-3-5/h2,5H,1,3H2	J15	1.99e-05	0.00223092	0.00241	0.00231	2.63654e-05
1544	HOC2H4CO3H	106.077	HOCH2CH2O2 + OH	OCCC(=O)OO	InChI=1S/C3H6O4/c4-2-1-3(5)7-6/h4,6H,1-2H2	J41	5.79e-06	0.000649096	8.5369e-05	NaN	9.33937e-07
1545	HOC3H6CHO	88.1051	HO1C3O2 + HO2 + CO	OCCCC=O	InChI=1S/C4H8O2/c5-3-1-2-4-6/h3,6H,1-2,4H2	J15	1.99e-05	0.00223092	0.00188	0.000113	2.05672e-05
1546	HOC3H6CO3H	120.104	HO1C3O2 + OH	OCCCC(=O)OO	InChI=1S/C4H8O4/c5-3-1-2-4(6)8-7/h5,7H,1-3H2	J41	5.79e-06	0.000649096	8.5369e-05	NaN	9.33937e-07
1547	HOC4CHOOOH	134.131	HOC3H6CHO + HO2 + CO + OH+ HOC4CHOO + OH	OCCCC(OO)C=O	InChI=1S/C5H10O4/c6-3-1-2-5(4-7)9-8/h4-6,8H,1-3H2	J17+J41	6.079e-05	0.00681495	0.00218754	1.42682e-05	2.39317e-05
1548	HOCH2CHO	60.052	HO2 + HCHO + HO2 + CO	OCC=O	InChI=1S/C2H4O2/c3-1-2-4/h1,4H,2H2	J15	1.99e-05	0.00223092	0.000584	0.000207	6.38896e-06
1549	HOCH2CO3H	92.0508	HCHO + HO2 + OH	OCC(=O)OO	InChI=1S/C2H4O4/c3-1-2(4)6-5/h3,5H,1H2	J41	5.79e-06	0.000649096	8.5369e-05	NaN	9.33937e-07
1550	HOCH2COCHO	88.0621	HOCH2CO3 + CO + HO2	OCC(=O)C=O	InChI=1S/C3H4O3/c4-1-3(6)2-5/h1,5H,2H2	J34	0.000125	0.0140133	0.0138833	0.00104797	0.000151883
1551	HOCH2COCO2H	104.061	HOCH2CO3 + HO2	OCC(=O)C(=O)O	InChI=1S/C3H4O4/c4-1-2(5)3(6)7/h4H,1H2,(H,6,7)	J34	0.000125	0.0140133	0.0186	0.016	0.000203484
1552	HOCHOCOOH	106.077	CHOCOHCO + OH	OCC(OO)C=O	InChI=1S/C3H6O4/c4-1-3(2-5)7-6/h1,3,5-6H,2H2	J41	5.79e-06	0.000649096	0.00294754	0.00231004	3.22461e-05
1553	HOCO3C4OOH	120.104	HO1CO3C4O + OH+ HO1CO3C4O + OH	OCCC(=O)COO	InChI=1S/C4H8O4/c5-2-1-4(6)3-8-7/h5,7H,1-3H2	J41+J22	9.77e-06	0.00109528	0.00098954	3.52709e-05	1.08256e-05
1554	HOCO3C5OOH	134.131	CH3CHO + HOC2H4CO3 + OH+ HOCO3C54O + OH	OCCC(=O)C(C)OO	InChI=1S/C5H10O4/c1-4(9-8)5(7)2-3-6/h4,6,8H,2-3H2,1H3	J22+J41	9.77e-06	0.00109528	0.00073154	7.26465e-05	8.00305e-06
1555	HOCO4C5OOH	134.131	HO2CO4C5O + OH+ HO2CO4C5O + OH	OOCC(=O)CC(C)O	InChI=1S/C5H10O4/c1-4(6)2-5(7)3-9-8/h4,6,8H,2-3H2,1H3	J41+J22	9.77e-06	0.00109528	0.00073154	7.26465e-05	8.00305e-06
1556	HOCOC4DIAL	116.072	HCOCOHCO3 + HO2 + CO+ HCOCOHCO3 + HO2 + CO	O=CC(=O)C(O)C=O	InChI=1S/C4H4O4/c5-1-3(7)4(8)2-6/h1-3,7H	J34+J15	0.0001449	0.0162442	0.004212	0.000163085	4.60793e-05
1557	HOHOC4DIAL	118.088	C32OH13CO + HO2 + HO2 + CO	O=CC(O)C(O)C=O	InChI=1S/C4H6O4/c5-1-3(7)4(8)2-6/h1-4,7-8H	J15.*2	3.98e-05	0.00446184	0.00376	0.000159806	4.11344e-05
1558	HOIBUTCHO	102.132	IBUTOLCO2 + HO2 + CO	CC(CC=O)CO	InChI=1S/C5H10O2/c1-5(4-7)2-3-6/h3,5,7H,2,4H2,1H3	J15	1.99e-05	0.00223092	0.00165	4.27e-06	1.8051e-05
1559	HOIBUTCO3H	134.131	SC4H9O2 + OH	OCC(C)CC(=O)OO	InChI=1S/C5H10O4/c1-4(3-6)2-5(7)9-8/h4,6,8H,2-3H2,1H3	J41	5.79e-06	0.000649096	8.5369e-05	NaN	9.33937e-07
1560	HOIPRCHO	88.1051	HYPROPO2 + CO + HO2	CC(CO)C=O	InChI=1S/C4H8O2/c1-4(2-5)3-6/h2,4,6H,3H2,1H3	J17	5.5e-05	0.00616586	0.00188	0.000113	2.05672e-05
1561	HOIPRCO3H	120.104	HYPROPO2 + OH	OCC(C)C(=O)OO	InChI=1S/C4H8O4/c1-3(2-5)4(6)8-7/h3,5,7H,2H2,1H3	J41	5.79e-06	0.000649096	8.5369e-05	NaN	9.33937e-07
1562	HOIPRGLYOX	116.115	HOIPRCO3 + CO + HO2	CC(CO)C(=O)C=O	InChI=1S/C5H8O3/c1-4(2-6)5(8)3-7/h3-4,6H,2H2,1H3	J34	0.000125	0.0140133	0.0142087	0.00046023	0.000155444
1563	HOPINONIC	200.232	C920O2 + HO2	OCC(=O)C1CC(CC(=O)O)C1(C)C	InChI=1S/C10H16O4/c1-10(2)6(4-9(13)14)3-7(10)8(12)5-11/h6-7,11H,3-5H2,1-2H3,(H,13,14)	J22	3.98e-06	0.000446184	0.000288	0.000185347	3.15072e-06
1564	HPC52CO3H	198.128	HO2 + DHPMPAL + OH	OOCC(C(C(=O)OO)O)(OO)C	InChI=1S/C5H10O8/c1-5(13-10,2-11-8)3(6)4(7)12-9/h3,6,8-10H,2H2,1H3	J41.*3	1.737e-05	0.00194729	0.00126908	7.39112e-05	1.38837e-05
1565	HPC52OOH	166.129	HO2 + DHPMPAL + HO2 + CO+ HPC52O + OH	OOCC(C(C=O)O)(OO)C	InChI=1S/C5H10O6/c1-5(11-9,3-10-8)4(7)2-6/h2,4,7-9H,3H2,1H3	J15+J41.*2	3.148e-05	0.00352911	0.00272508	1.97213e-05	2.98124e-05
1566	HPNC524CO	211.127	HOCH2CHO + HOCH2COCHO + NO2 + OH	OCC(ON(=O)=O)C(CO)(OO)C=O	InChI=1S/C5H9NO8/c7-1-4(13-6(10)11)5(2-8,3-9)14-12/h2,4,7,9,12H,1,3H2	J56.*4	0.0001264	0.0141703	0.0181446	0.0057294	0.000198502
1567	HVMK	86.0892	CO + HO2 + MGLYOX + OH	CC(=O)C=CO	InChI=1S/C4H6O2/c1-4(6)2-3-5/h2-3,5H,1H3	J20.*0.5	0.000282	0.031614	0.000334439	0.000140722	3.65876e-06
1568	HYETHO2H	78.0672	HOCH2CH2O + OH	OCCOO	InChI=1S/C2H6O3/c3-1-2-5-4/h3-4H,1-2H2	J41	5.79e-06	0.000649096	0.00053754	1.36143e-05	5.88069e-06
1569	HYPERACET	90.0779	CH3CO3 + HCHO + OH+ CH3COCH2O + OH	CC(=O)COO	InChI=1S/C3H6O3/c1-3(4)2-6-5/h5H,2H2,1H3	J22+J41	9.77e-06	0.00109528	0.000630851	2.61748e-05	6.90151e-06
1570	HYPROPO2H	92.0938	HYPROPO + OH	OCC(C)OO	InChI=1S/C3H8O3/c1-3(2-4)6-5/h3-5H,2H2,1H3	J41	5.79e-06	0.000649096	0.00053754	1.36143e-05	5.88069e-06
1571	IBUALANO3	133.103	IBUTALBO + NO2+ IBUTALBO + NO2	O=CC(C)CON(=O)=O	InChI=1S/C4H7NO4/c1-4(2-6)3-9-5(7)8/h2,4H,3H2,1H3	J53+J17	5.679e-05	0.00636653	0.0144816	0.00400026	0.000158429
1572	IBUTALBO2H	104.105	IBUTALBO + OH+ IBUTALBO + OH	CC(COO)C=O	InChI=1S/C4H8O3/c1-4(2-5)3-7-6/h2,4,6H,3H2,1H3	J41+J17	6.079e-05	0.00681495	0.00243825	0.000113817	2.66745e-05
1573	IBUTALO2H	104.105	CH3COCH3 + OH + HO2 + CO+ M2PROPAL2O + OH	OOC(C)(C)C=O	InChI=1S/C4H8O3/c1-4(2,3-5)7-6/h3,6H,1-2H3	J17+J41	6.079e-05	0.00681495	0.00243825	0.000113817	2.66745e-05
1574	IBUTALOH	88.1051	CH3COCH3 + HO2 + HO2 + CO	O=CC(C)(C)O	InChI=1S/C4H8O2/c1-4(2,6)3-5/h3,6H,1-2H3	J17	5.5e-05	0.00616586	0.00188	0.000113	2.05672e-05
1575	IBUTDIAL	86.0892	PROPALO2 + HO2 + CO	O=CC(C)C=O	InChI=1S/C4H6O2/c1-4(2-5)3-6/h2-4H,1H3	J17.*2.0	0.00011	0.0123317	0.00376	0.000159806	4.11344e-05
1576	IBUTOLBO2H	106.12	IBUTOLBO + OH	OCC(C)(C)OO	InChI=1S/C4H10O3/c1-4(2,3-5)7-6/h5-6H,3H2,1-2H3	J41	5.79e-06	0.000649096	0.00053754	1.36143e-05	5.88069e-06
1577	IBUTOLCNO3	135.119	IBUTOLCO + NO2	OCC(C)CON(=O)=O	InChI=1S/C4H9NO4/c1-4(2-6)3-9-5(7)8/h4,6H,2-3H2,1H3	J53	1.79e-06	0.000200671	0.000191843	1.89503e-05	2.09876e-06
1578	IBUTOLCO2H	106.12	IBUTOLCO + OH	OOCC(C)CO	InChI=1S/C4H10O3/c1-4(2-5)3-7-6/h4-6H,2-3H2,1H3	J41	5.79e-06	0.000649096	0.00053754	1.36143e-05	5.88069e-06
1579	IC3H7NO3	105.093	IC3H7O + NO2	CC(C)ON(=O)=O	InChI=1S/C3H7NO3/c1-3(2)7-4(5)6/h3H,1-2H3	J54	2.99e-06	0.000335198	0.000190129	3.66408e-05	2.08001e-06
1580	IC3H7OOH	76.0944	IC3H7O + OH	OOC(C)C	InChI=1S/C3H8O2/c1-3(2)5-4/h3-4H,1-2H3	J41	5.79e-06	0.000649096	0.000558251	1.36143e-05	6.10727e-06
1581	IC4CHOAOOH	118.131	M3BUTAL2O + OH	OOC(C=O)C(C)C	InChI=1S/C5H10O3/c1-4(2)5(3-6)8-7/h3-5,7H,1-2H3	J41	5.79e-06	0.000649096	0.00220825	1.42682e-05	2.41583e-05
1582	IC4H9NO3	119.119	IC4H9O + NO2	CC(C)CON(=O)=O	InChI=1S/C4H9NO3/c1-4(2)3-8-5(6)7/h4H,3H2,1-2H3	J53	1.79e-06	0.000200671	0.000191843	1.89503e-05	2.09876e-06
1583	IC4H9OOH	90.121	IC4H9O + OH	OOCC(C)C	InChI=1S/C4H10O2/c1-4(2)3-6-5/h4-5H,3H2,1-2H3	J41	5.79e-06	0.000649096	0.000558251	1.36143e-05	6.10727e-06
1584	IC7DCCO2H	142.153	IPRGLYOX + CO + HO2 + HO2+ IPRGLYOX + CO + HO2 + HO2	OC(=O)C=CC(=O)C(C)C	InChI=1S/C7H10O3/c1-5(2)6(8)3-4-7(9)10/h3-5H,1-2H3,(H,9,10)	J15+J22	2.388e-05	0.0026771	0.000334439	0.000140722	3.65876e-06
1585	IC7DCCO3H	158.152	IC7DCCO2 + OH	OOC(=O)C=CC(=O)C(C)C	InChI=1S/C7H10O4/c1-5(2)6(8)3-4-7(9)11-10/h3-5,10H,1-2H3	J20.*2	0.001128	0.126456	0.000419808	0.000140722	4.5927e-06
1586	IC7DCOH	160.168	IC7DCO + HO2+ IC7DCO + HO2	O=CC(O)C(O)C(=O)C(C)C	InChI=1S/C7H12O4/c1-4(2)6(10)7(11)5(9)3-8/h3-5,7,9,11H,1-2H3	J15+J22	2.388e-05	0.0026771	0.001328	0.000248816	1.45283e-05
1587	IC7DCOOH	176.167	IC7DCO + OH+ IC7DCO + OH+ IC7DCO + OH	OOC(C(O)C=O)C(=O)C(C)C	InChI=1S/C7H12O5/c1-4(2)6(10)7(12-11)5(9)3-8/h3-5,7,9,11H,1-2H3	J41+J15+J22	2.967e-05	0.0033262	0.00186554	0.000249188	2.0409e-05
1588	IC7DICARB	126.153	IC7DCCO3 + HO2+ IPBFUONE+ IPRCO3 + GLYOX + HO2 + CO	O=CC=CC(=O)C(C)C	InChI=1S/C7H10O2/c1-6(2)7(9)4-3-5-8/h3-6H,1-2H3	J4.*0.2.*0.6+J4.*0.2.*0.4+J4.*0.05.*0.34	0.00193564	0.216998	0.00137444	0.00021762	1.50364e-05
1589	IEACHO	116.115	HMVKBO2 + CO + HO2	CC(O)(C=O)C1CO1	InChI=1S/C5H8O3/c1-5(7,3-6)4-2-8-4/h3-4,7H,2H2,1H3	J17	5.5e-05	0.00616586	0.00165	4.27e-06	1.8051e-05
1590	IEACO3H	148.114	HMVKBO2 + OH	CC(O)(C1CO1)C(=O)OO	InChI=1S/C5H8O5/c1-5(7,3-2-9-3)4(6)10-8/h3,7-8H,2H2,1H3	J41	5.79e-06	0.000649096	8.5369e-05	NaN	9.33937e-07
1591	IEC2OOH	148.114	BIACETOH + OH + CO + HO2+ MGLYOX + OH + HOCH2CO3	OCC(=O)C(C)(OO)C=O	InChI=1S/C5H8O5/c1-5(3-7,10-9)4(8)2-6/h3,6,9H,2H2,1H3	J17+J22	5.898e-05	0.00661204	0.00238154	7.27719e-05	2.6054e-05
1592	IECCHO	116.115	MACRO2 + HO2 + CO	CC1(CO1)C(O)C=O	InChI=1S/C5H8O3/c1-5(3-8-5)4(7)2-6/h2,4,7H,3H2,1H3	J15	1.99e-05	0.00223092	0.00165	4.27e-06	1.8051e-05
1593	IECCO3H	148.114	MACRO2 + OH	CC1(CO1)C(O)C(=O)OO	InChI=1S/C5H8O5/c1-5(2-9-5)3(6)4(7)10-8/h3,6,8H,2H2,1H3	J41	5.79e-06	0.000649096	8.5369e-05	NaN	9.33937e-07
1594	INAHCHO	179.128	HMVKANO3 + HO2 + CO + HO2	O=CC(C)(O)C(O)CON(=O)=O	InChI=1S/C5H9NO6/c1-5(9,3-7)4(8)2-12-6(10)11/h3-4,8-9H,2H2,1H3	J17	5.5e-05	0.00616586	0.0176071	0.00572939	0.000192622
1595	INAHCO3H	211.127	HMVKANO3 + HO2 + OH	OOC(=O)C(C)(O)C(O)CON(=O)=O	InChI=1S/C5H9NO8/c1-5(9,4(8)14-12)3(7)2-13-6(10)11/h3,7,9,12H,2H2,1H3	J41	5.79e-06	0.000649096	9.87202e-05	3.89233e-06	1.08e-06
1596	INAHPCHO	195.127	HMVKANO3 + OH + CO + HO2+ HMVKANO3 + OH + CO + HO2	OOC(C)(C=O)C(O)CON(=O)=O	InChI=1S/C5H9NO7/c1-5(3-7,13-11)4(8)2-12-6(9)10/h3-4,8,11H,2H2,1H3	J17+J41	6.079e-05	0.00681495	0.0181446	0.0057294	0.000198502
1597	INAHPCO2H	211.127	HMVKANO3 + OH + HO2	OOC(C)(C(=O)O)C(O)CON(=O)=O	InChI=1S/C5H9NO8/c1-5(14-12,4(8)9)3(7)2-13-6(10)11/h3,7,12H,2H2,1H3,(H,8,9)	J41	5.79e-06	0.000649096	0.000550891	1.41598e-05	6.02675e-06
1598	INAHPCO3H	227.126	HMVKANO3 + OH + OH	OOC(=O)C(C)(OO)C(O)CON(=O)=O	InChI=1S/C5H9NO9/c1-5(15-12,4(8)14-11)3(7)2-13-6(9)10/h3,7,11-12H,2H2,1H3	J41.*2	1.158e-05	0.00129819	0.00063626	1.41598e-05	6.96069e-06
1599	INAHPPAN	272.124	INAHPCO3 + NO2	OOC(C)(C(O)CON(=O)=O)C(=O)OON(=O)=O	InChI=1S/C5H8N2O11/c1-5(17-14,3(8)2-15-6(10)11)4(9)16-18-7(12)13/h3,8,14H,2H2,1H3	J41	5.79e-06	0.000649096	0.00599254	0.00318908	6.55584e-05
1600	INANCHO	224.126	HMVKANO3 + NO2 + CO + HO2	O=CC(C)(ON(=O)=O)C(O)CON(=O)=O	InChI=1S/C5H8N2O8/c1-5(3-8,15-7(12)13)4(9)2-14-6(10)11/h3-4,9H,2H2,1H3	J56.*10	0.000316	0.0354256	0.0176205	0.00572939	0.000192768
1601	INANCO	224.126	ACETOL + NO2 + NO3CH2CO3	OCC(C)(ON(=O)=O)C(=O)CON(=O)=O	InChI=1S/C5H8N2O8/c1-5(3-8,15-7(12)13)4(9)2-14-6(10)11/h8H,2-3H2,1H3	J56.*1.6	5.056e-05	0.0056681	0.00568894	0.00318905	6.22371e-05
1602	INANCO3H	256.124	HMVKANO3 + NO2 + OH	OOC(=O)C(C)(ON(=O)=O)C(O)CON(=O)=O	InChI=1S/C5H8N2O10/c1-5(4(9)16-14,17-7(12)13)3(8)2-15-6(10)11/h3,8,14H,2H2,1H3	J41	5.79e-06	0.000649096	0.000848451	5.50459e-06	9.28205e-06
1603	INANCOCO2H	238.109	NO3CH2CO3 + CH3COCO2H + NO2	O=N(=O)OCC(=O)C(C)(ON(=O)=O)C(=O)O	InChI=1S/C5H6N2O9/c1-5(4(9)10,16-7(13)14)3(8)2-15-6(11)12/h2H2,1H3,(H,9,10)	J56.*1.6	5.056e-05	0.0056681	0.00568894	0.00318905	6.22371e-05
1604	INANCOCO3H	254.108	NO3CH2CO3 + CH3COCO3H + NO2	OOC(=O)C(C)(ON(=O)=O)C(=O)CON(=O)=O	InChI=1S/C5H6N2O10/c1-5(4(9)16-14,17-7(12)13)3(8)2-15-6(10)11/h14H,2H2,1H3	J56.*1.6	5.056e-05	0.0056681	0.00577431	0.00318905	6.3171e-05
1605	INANCOPAN	299.106	INANCOCO3 + NO2	O=N(=O)OCC(=O)C(C)(ON(=O)=O)C(=O)OON(=O)=O	InChI=1S/C5H5N3O12/c1-5(19-7(13)14,3(9)2-17-6(11)12)4(10)18-20-8(15)16/h2H2,1H3	J56.*1.6	5.056e-05	0.0056681	0.01091	0.00451	0.000119355
1606	INAOOH	197.143	INAO + OH	OCC(C)(OO)C(O)CON(=O)=O	InChI=1S/C5H11NO7/c1-5(3-7,13-11)4(8)2-12-6(9)10/h4,7-8,11H,2-3H2,1H3	J41	5.79e-06	0.000649096	0.000550891	1.41598e-05	6.02675e-06
1607	INB1CO	179.128	ACETOL + NO2 + HOCH2CO3	OCC(=O)C(C)(CO)ON(=O)=O	InChI=1S/C5H9NO6/c1-5(3-8,4(9)2-7)12-6(10)11/h7-8H,2-3H2,1H3	J56.*1.6	5.056e-05	0.0056681	0.005455	0.00318905	5.96777e-05
1608	INB1GLYOX	177.112	MACRNCO3 + CO + HO2	O=CC(=O)C(C)(CO)ON(=O)=O	InChI=1S/C5H7NO6/c1-5(3-8,4(9)2-7)12-6(10)11/h2,8H,3H2,1H3	J34	0.000125	0.0140133	0.007105	0.00318905	7.77287e-05
1609	INB1HPCHO	195.127	ACETOL + GLYOX + OH + NO2	OOC(C=O)C(C)(CO)ON(=O)=O	InChI=1S/C5H9NO7/c1-5(3-8,13-6(9)10)4(2-7)12-11/h2,4,8,11H,3H2,1H3	J56.*4	0.0001264	0.0141703	0.0181446	0.0057294	0.000198502
1610	INB1HPCO3H	227.126	MACRNO3 + OH + OH	OOC(=O)C(OO)C(C)(CO)ON(=O)=O	InChI=1S/C5H9NO9/c1-5(2-7,15-6(9)10)3(13-11)4(8)14-12/h3,7,11-12H,2H2,1H3	J41	5.79e-06	0.000649096	0.00063626	1.41598e-05	6.96069e-06
1611	INB1NACHO	224.126	ACETOL + GLYOX + NO2 + NO2	O=CC(ON(=O)=O)C(C)(CO)ON(=O)=O	InChI=1S/C5H8N2O8/c1-5(3-9,15-7(12)13)4(2-8)14-6(10)11/h2,4,9H,3H2,1H3	J56.*10	0.000316	0.0354256	0.0176205	0.00572939	0.000192768
1612	INB1NACO3H	256.124	MACRNO3 + NO2 + OH	OOC(=O)C(ON(=O)=O)C(C)(CO)ON(=O)=O	InChI=1S/C5H8N2O10/c1-5(2-8,17-7(12)13)3(4(9)16-14)15-6(10)11/h3,8,14H,2H2,1H3	J41	5.79e-06	0.000649096	0.000848451	5.50459e-06	9.28205e-06
1613	INB1NBCHO	224.126	MVKNO3 + NO2 + CO + HO2	OCC(ON(=O)=O)C(C)(C=O)ON(=O)=O	InChI=1S/C5H8N2O8/c1-5(3-9,15-7(12)13)4(2-8)14-6(10)11/h3-4,8H,2H2,1H3	J56.*10	0.000316	0.0354256	0.0176205	0.00572939	0.000192768
1614	INB1NBCO3H	256.124	MVKNO3 + NO2 + OH	OOC(=O)C(C)(ON(=O)=O)C(CO)ON(=O)=O	InChI=1S/C5H8N2O10/c1-5(4(9)16-14,17-7(12)13)3(2-8)15-6(10)11/h3,8,14H,2H2,1H3	J41	5.79e-06	0.000649096	0.000848451	5.50459e-06	9.28205e-06
1615	INB1OOH	197.143	INB1O + OH	OCC(OO)C(C)(CO)ON(=O)=O	InChI=1S/C5H11NO7/c1-5(3-8,13-6(9)10)4(2-7)12-11/h4,7-8,11H,2-3H2,1H3	J41	5.79e-06	0.000649096	0.000550891	1.41598e-05	6.02675e-06
1616	INB2OOH	197.143	INB2O + OH	OOCC(O)C(C)(CO)ON(=O)=O	InChI=1S/C5H11NO7/c1-5(3-7,13-6(9)10)4(8)2-12-11/h4,7-8,11H,2-3H2,1H3	J41	5.79e-06	0.000649096	0.000550891	1.41598e-05	6.02675e-06
1617	INCCO	179.128	C59O + NO2	OCC(=O)C(C)(O)CON(=O)=O	InChI=1S/C5H9NO6/c1-5(9,4(8)2-7)3-12-6(10)11/h7,9H,2-3H2,1H3	J56.*0.91	2.8756e-05	0.00322373	0.005455	0.00318905	5.96777e-05
1618	INCGLYOX	177.112	MACRNBCO3 + CO + HO2	O=CC(=O)C(C)(O)CON(=O)=O	InChI=1S/C5H7NO6/c1-5(9,4(8)2-7)3-12-6(10)11/h2,9H,3H2,1H3	J34	0.000125	0.0140133	0.007105	0.00318905	7.77287e-05
1619	INCNCHO	224.126	GLYOX + NOA + HO2 + NO2	O=CC(ON(=O)=O)C(C)(O)CON(=O)=O	InChI=1S/C5H8N2O8/c1-5(9,3-14-6(10)11)4(2-8)15-7(12)13/h2,4,9H,3H2,1H3	J56.*10	0.000316	0.0354256	0.0176205	0.00572939	0.000192768
1620	INCNCO3H	256.124	MACRNB + NO2 + OH	OOC(=O)C(ON(=O)=O)C(C)(O)CON(=O)=O	InChI=1S/C5H8N2O10/c1-5(9,2-15-6(10)11)3(4(8)17-14)16-7(12)13/h3,9,14H,2H2,1H3	J41	5.79e-06	0.000649096	0.000848451	5.50459e-06	9.28205e-06
1621	INCOOH	197.143	INCO + OH	OCC(OO)C(C)(O)CON(=O)=O	InChI=1S/C5H11NO7/c1-5(8,3-12-6(9)10)4(2-7)13-11/h4,7-8,11H,2-3H2,1H3	J41	5.79e-06	0.000649096	0.000550891	1.41598e-05	6.02675e-06
1622	INDHCHO	179.128	MGLYOX + HOCH2CHO + HO2 + NO2	OCC(ON(=O)=O)C(C)(O)C=O	InChI=1S/C5H9NO6/c1-5(9,3-8)4(2-7)12-6(10)11/h3-4,7,9H,2H2,1H3	J56.*4	0.0001264	0.0141703	0.0176071	0.00572939	0.000192622
1623	INDHCO3H	211.127	MVKNO3 + OH + HO2	OCC(ON(=O)=O)C(C)(O)C(=O)OO	InChI=1S/C5H9NO8/c1-5(9,4(8)14-12)3(2-7)13-6(10)11/h3,7,9,12H,2H2,1H3	J41	5.79e-06	0.000649096	9.87202e-05	3.89233e-06	1.08e-06
1624	INDHPCHO	195.127	MGLYOX + HOCH2CHO + OH + NO2	OCC(ON(=O)=O)C(C)(OO)C=O	InChI=1S/C5H9NO7/c1-5(3-8,13-11)4(2-7)12-6(9)10/h3-4,7,11H,2H2,1H3	J56.*4	0.0001264	0.0141703	0.0181446	0.0057294	0.000198502
1625	INDHPCO3H	227.126	MVKNO3 + OH + OH	OOC(=O)C(C)(OO)C(CO)ON(=O)=O	InChI=1S/C5H9NO9/c1-5(15-12,4(8)14-11)3(2-7)13-6(9)10/h3,7,11-12H,2H2,1H3	J41.*2	1.158e-05	0.00129819	0.00063626	1.41598e-05	6.96069e-06
1626	INDHPPAN	272.124	INDHPCO3 + NO2	OCC(ON(=O)=O)C(C)(OO)C(=O)OON(=O)=O	InChI=1S/C5H8N2O11/c1-5(17-14,3(2-8)15-6(10)11)4(9)16-18-7(12)13/h3,8,14H,2H2,1H3	J41	5.79e-06	0.000649096	0.00599254	0.00318908	6.55584e-05
1627	INDOOH	197.143	INDO + OH	OCC(ON(=O)=O)C(C)(CO)OO	InChI=1S/C5H11NO7/c1-5(3-8,13-11)4(2-7)12-6(9)10/h4,7-8,11H,2-3H2,1H3	J41	5.79e-06	0.000649096	0.000550891	1.41598e-05	6.02675e-06
1628	IP3ODBCO2H	142.153	IPGLYOXOH + HO2 + CO + HO2 + CO+ IPGLYOXOH + HO2 + CO + HO2 + CO	O=CC=C(C(C)C)C(=O)O	InChI=1S/C7H10O3/c1-5(2)6(3-4-8)7(9)10/h3-5H,1-2H3,(H,9,10)	J18+J19	2.2e-06	0.000246634	0.000326281	0.000277531	3.56951e-06
1629	IPBENZOOH	152.19	IPBENZO + OH	OOc1ccccc1C(C)C	InChI=1S/C9H12O2/c1-7(2)8-5-3-4-6-9(8)11-10/h3-7,10H,1-2H3	J41	5.79e-06	0.000649096	0.000558251	1.36143e-05	6.10727e-06
1630	IPBFUOOH	176.167	IPBFUO + OH	OOC1C(=O)OC(C(C)C)C1O	InChI=1S/C7H12O5/c1-3(2)5-4(8)6(12-10)7(9)11-5/h3-6,8,10H,1-2H3	J41	5.79e-06	0.000649096	0.00082554	0.000185846	9.03141e-06
1631	IPBZBPRNO3	231.203	IPBZBIPRO + NO2	O=N(=O)OC1C=CC2(OOC1C2O)C(C)C	InChI=1S/C9H13NO6/c1-5(2)9-4-3-6(14-10(12)13)7(8(9)11)15-16-9/h3-8,11H,1-2H3	J54	2.99e-06	0.000335198	0.000626339	3.50652e-05	6.85215e-06
1632	IPBZBPROOH	202.204	IPBZBIPRO + OH	OOC1C=CC2(OOC1C2O)C(C)C	InChI=1S/C9H14O5/c1-5(2)9-4-3-6(12-11)7(8(9)10)13-14-9/h3-8,10-11H,1-2H3	J41	5.79e-06	0.000649096	0.0011165	1.92535e-05	1.22145e-05
1633	IPBZMUCCO	200.189	IPRCO3 + EPXC4DIAL + CO + HO2+ IPRCO3 + EPXC4DIAL + CO + HO2	O=CC1OC1C(O)C(=O)C(=O)C(C)C	InChI=1S/C9H12O5/c1-4(2)6(11)7(12)8(13)9-5(3-10)14-9/h3-5,8-9,13H,1-2H3	J17+J35	0.000323	0.0362104	0.0304469	0.00764277	0.00033309
1634	IPBZMUCNO3	247.202	EPXC4DIAL + NO2 + IPRCO3 + CO + HO2+ EPXC4DIAL + NO2 + IPRCO3 + CO + HO2	O=CC1OC1C(O)C(ON(=O)=O)C(=O)C(C)C	InChI=1S/C9H13NO7/c1-4(2)6(12)9(17-10(14)15)7(13)8-5(3-11)16-8/h3-5,7-9,13H,1-2H3	J17+J22	5.898e-05	0.00661204	0.00384726	0.00091486	4.20891e-05
1635	IPBZMUCO2H	184.189	C7M15CO2O2 + HO2+ C7M15CO2O2 + HO2	CC(C)C(=O)C=CC1OC1C(=O)O	InChI=1S/C9H12O4/c1-5(2)6(10)3-4-7-8(13-7)9(11)12/h3-5,7-8H,1-2H3,(H,11,12)	J23+J24	3.6e-06	0.000403583	0.000334439	0.000140722	3.65876e-06
1636	IPBZMUCO3H	200.189	C7M15CO2O2 + OH+ C7M15CO2O2 + OH+ C7M15CO2O2 + OH	OOC(=O)C1OC1C=CC(=O)C(C)C	InChI=1S/C9H12O5/c1-5(2)6(10)3-4-7-8(13-7)9(11)14-12/h3-5,7-8,12H,1-2H3	J41+J23+J24	9.39e-06	0.00105268	0.000419808	0.000140722	4.5927e-06
1637	IPBZMUCOH	202.204	IPBZMUCO + HO2+ IPBZMUCO + HO2	O=CC1OC1C(O)C(O)C(=O)C(C)C	InChI=1S/C9H14O5/c1-4(2)6(11)7(12)8(13)9-5(3-10)14-9/h3-5,7-9,12-13H,1-2H3	J17+J22	5.898e-05	0.00661204	0.002126	0.000564999	2.32584e-05
1638	IPBZMUCOOH	218.204	IPBZMUCO + OH+ IPBZMUCO + OH+ IPBZMUCO + OH	O=CC1OC1C(O)C(OO)C(=O)C(C)C	InChI=1S/C9H14O6/c1-4(2)6(11)9(15-13)7(12)8-5(3-10)14-8/h3-5,7-9,12-13H,1-2H3	J41+J17+J22	6.477e-05	0.00726114	0.00266354	0.000565163	2.91391e-05
1639	IPBZOBPROH	184.189	IC7DCCO3 + GLYOX + HO2	O=C1C=CC2(OOC1C2O)C(C)C	InChI=1S/C9H12O4/c1-5(2)9-4-3-6(10)7(8(9)11)12-13-9/h3-5,7-8,11H,1-2H3	J22	3.98e-06	0.000446184	0.00089269	0.000141379	9.76603e-06
1640	IPBZOLOOH	218.204	IPBENZOLO + OH	OOC1(O)C=CC2(OOC1C2O)C(C)C	InChI=1S/C9H14O6/c1-5(2)8-3-4-9(11,14-12)7(6(8)10)13-15-8/h3-7,10-12H,1-2H3	J41	5.79e-06	0.000649096	0.00107508	1.92535e-05	1.17614e-05
1641	IPBZPOXMUC	168.19	C7M15CO2O2 + HO2 + CO+ EPXC4DIAL + IPRCO3 + HO2 + CO	O=CC1OC1C=CC(=O)C(C)C	InChI=1S/C9H12O3/c1-6(2)7(11)3-4-8-9(5-10)12-8/h3-6,8-9H,1-2H3	J4.*0.028.*0.5+J4.*0.028.*0.5	0.00024976	0.0279997	0.00217244	0.000551971	2.37665e-05
1642	IPCATC1OOH	168.19	IPCATEC1O + OH	OOc1c(O)cccc1C(C)C	InChI=1S/C9H12O3/c1-6(2)7-4-3-5-8(10)9(7)12-11/h3-6,10-11H,1-2H3	J41	5.79e-06	0.000649096	0.00053754	1.36143e-05	5.88069e-06
1643	IPEANO3	133.146	IPEAO + NO2	CCC(C)CON(=O)=O	InChI=1S/C5H11NO3/c1-3-5(2)4-9-6(7)8/h5H,3-4H2,1-2H3	J53	1.79e-06	0.000200671	0.000233945	3.89233e-06	2.55936e-06
1644	IPEAOOH	104.148	IPEAO + OH	CC(COO)CC	InChI=1S/C5H12O2/c1-3-5(2)4-7-6/h5-6H,3-4H2,1-2H3	J41	5.79e-06	0.000649096	0.000558251	1.36143e-05	6.10727e-06
1645	IPEBNO3	133.146	IPEBO + NO2	O=N(=O)OC(C)C(C)C	InChI=1S/C5H11NO3/c1-4(2)5(3)9-6(7)8/h4-5H,1-3H3	J54	2.99e-06	0.000335198	0.000233945	3.89233e-06	2.55936e-06
1646	IPEBOOH	104.148	IPEBO + OH	OOC(C)C(C)C	InChI=1S/C5H12O2/c1-4(2)5(3)7-6/h4-6H,1-3H3	J41	5.79e-06	0.000649096	0.000558251	1.36143e-05	6.10727e-06
1647	IPECNO3	133.146	IPECO + NO2	CCC(C)(C)ON(=O)=O	InChI=1S/C5H11NO3/c1-4-5(2,3)9-6(7)8/h4H2,1-3H3	J55	8.33e-06	0.000933847	0.000233945	3.89233e-06	2.55936e-06
1648	IPECOOH	104.148	IPECO + OH	CCC(C)(C)OO	InChI=1S/C5H12O2/c1-4-5(2,3)7-6/h6H,4H2,1-3H3	J41	5.79e-06	0.000649096	0.000558251	1.36143e-05	6.10727e-06
1649	IPGLYOXOH	116.115	IPRCO3 + HO2	O=C(C(C)C)C(=O)O	InChI=1S/C5H8O3/c1-3(2)4(6)5(7)8/h3H,1-2H3,(H,7,8)	J22	3.98e-06	0.000446184	0.00165	4.27e-06	1.8051e-05
1650	IPMLNHYOOH	190.151	IPMALANHYO + OH	OOC1(C(C)C)C(=O)OC(=O)C1O	InChI=1S/C7H10O6/c1-3(2)7(13-11)4(8)5(9)12-6(7)10/h3-4,8,11H,1-2H3	J41	5.79e-06	0.000649096	0.00111354	0.000262474	1.21821e-05
1651	IPNCATCOOH	279.201	IPNCATECO + OH	OOC1(O)C(=C(N(=O)=O)C2OOC1(C(C)C)C2O)O	InChI=1S/C9H13NO9/c1-3(2)8-7(12)5(17-19-8)4(10(14)15)6(11)9(8,13)18-16/h3,5,7,11-13,16H,1-2H3	J41	5.79e-06	0.000649096	0.00107508	1.92535e-05	1.17614e-05
1652	IPNNCATOOH	324.198	IPNNCATCO + OH	OOC1(O)C(=C(N(=O)=O)C2OOC1(C(C)C)C2ON(=O)=O)O	InChI=1S/C9H12N2O11/c1-3(2)8-7(19-11(16)17)5(20-22-8)4(10(14)15)6(12)9(8,13)21-18/h3,5,7,12-13,18H,1-2H3	J41	5.79e-06	0.000649096	0.00114317	3.76154e-05	1.25063e-05
1653	IPRACBCHO	116.115	ETHACETO2 + HO2 + CO	O=CC(C)OC(=O)C	InChI=1S/C5H8O3/c1-4(3-6)8-5(2)7/h3-4H,1-2H3	J17	5.5e-05	0.00616586	0.001844	7.1487e-05	2.01734e-05
1654	IPRACBCO3H	148.114	ETHACETO2 + OH	CC(OC(=O)C)C(=O)OO	InChI=1S/C5H8O5/c1-3(5(7)10-8)9-4(2)6/h3,8H,1-2H3	J41	5.79e-06	0.000649096	0.000279369	7.13594e-05	3.0563e-06
1655	IPRACBNO3	163.129	IPRACBO + NO2	CC(=O)OC(C)CON(=O)=O	InChI=1S/C5H9NO5/c1-4(11-5(2)7)3-10-6(8)9/h4H,3H2,1-2H3	J53	1.79e-06	0.000200671	0.005455	0.00318905	5.96777e-05
1656	IPRACBOOH	134.131	IPRACBO + OH	CC(COO)OC(=O)C	InChI=1S/C5H10O4/c1-4(3-8-7)9-5(2)6/h4,7H,3H2,1-2H3	J41	5.79e-06	0.000649096	0.000752251	7.26465e-05	8.22963e-06
1657	IPRACNO3	163.129	IPROACETO + NO2	CC(=O)OC(C)(C)ON(=O)=O	InChI=1S/C5H9NO5/c1-4(7)10-5(2,3)11-6(8)9/h1-3H3	J55	8.33e-06	0.000933847	0.005455	0.00318905	5.96777e-05
1658	IPRACOOH	134.131	IPROACETO + OH	OOC(C)(C)OC(=O)C	InChI=1S/C5H10O4/c1-4(6)8-5(2,3)9-7/h7H,1-3H3	J41	5.79e-06	0.000649096	0.000752251	7.26465e-05	8.22963e-06
1659	IPRBQOOH	200.189	IPRBQO + OH	OOC1C(=O)C=C(C(C)C)C(=O)C1O	InChI=1S/C9H12O5/c1-4(2)5-3-6(10)9(14-13)8(12)7(5)11/h3-4,8-9,12-13H,1-2H3	J41	5.79e-06	0.000649096	0.00115998	0.000233113	1.26902e-05
1660	IPRCHO	72.1057	IC3H7O2 + HO2 + CO	O=CC(C)C	InChI=1S/C4H8O/c1-4(2)3-5/h3-4H,1-2H3	J17	5.5e-05	0.00616586	0.00575844	0.000113	6.29973e-05
1661	IPRFORMNO3	149.102	IPRFORMO + NO2	O=COC(C)(C)ON(=O)=O	InChI=1S/C4H7NO5/c1-4(2,9-3-6)10-5(7)8/h3H,1-2H3	J55	8.33e-06	0.000933847	0.0144816	0.00400026	0.000158429
1662	IPRFORMOOH	120.104	IPRFORMO + OH	O=COC(C)(C)OO	InChI=1S/C4H8O4/c1-4(2,8-6)7-3-5/h3,6H,1-2H3	J41	5.79e-06	0.000649096	0.00243825	0.000113817	2.66745e-05
1663	IPRGLYOX	100.116	IPRCO3 + HO2 + CO	O=CC(=O)C(C)C	InChI=1S/C5H8O2/c1-4(2)5(7)3-6/h3-4H,1-2H3	J34	0.000125	0.0140133	0.001844	7.1487e-05	2.01734e-05
1664	IPRHOCO3H	120.104	CH3COCH3 + HO2 + OH	OOC(=O)C(C)(C)O	InChI=1S/C4H8O4/c1-4(2,6)3(5)8-7/h6-7H,1-2H3	J41	5.79e-06	0.000649096	8.5369e-05	NaN	9.33937e-07
1665	IPRMETOOH	106.12	IPRMEETO + OH	COC(C)(C)OO	InChI=1S/C4H10O3/c1-4(2,6-3)7-5/h5H,1-3H3	J41	5.79e-06	0.000649096	0.000558251	1.36143e-05	6.10727e-06
1666	IPROC21NO3	149.145	IPROC21O + NO2	CC(C)OC(C)ON(=O)=O	InChI=1S/C5H11NO4/c1-4(2)9-5(3)10-6(7)8/h4-5H,1-3H3	J54	2.99e-06	0.000335198	0.000233945	3.89233e-06	2.55936e-06
1667	IPROC21OOH	120.147	IPROC21O + OH	OOC(C)OC(C)C	InChI=1S/C5H12O3/c1-4(2)7-5(3)8-6/h4-6H,1-3H3	J41	5.79e-06	0.000649096	0.000558251	1.36143e-05	6.10727e-06
1668	IPROMC2NO3	163.172	IPROMC2O + NO2	CC(C)OC(C)CON(=O)=O	InChI=1S/C6H13NO4/c1-5(2)11-6(3)4-10-7(8)9/h5-6H,4H2,1-3H3	J53	1.79e-06	0.000200671	0.00019272	3.23144e-05	2.10836e-06
1669	IPROMC2OOH	134.174	IPROMC2O + OH	OOCC(C)OC(C)C	InChI=1S/C6H14O3/c1-5(2)9-6(3)4-8-7/h5-7H,4H2,1-3H3	J41	5.79e-06	0.000649096	0.000558251	1.36143e-05	6.10727e-06
1670	IPROMCCHO	116.158	IPROC21O2 + CO + HO2	O=CC(C)OC(C)C	InChI=1S/C6H12O2/c1-5(2)8-6(3)4-7/h4-6H,1-3H3	J17	5.5e-05	0.00616586	0.00676923	5.72e-06	7.40554e-05
1671	IPROMCCO3H	148.157	IPROC21O2 + OH	OOC(=O)C(C)OC(C)C	InChI=1S/C6H12O4/c1-4(2)9-5(3)6(7)10-8/h4-5,8H,1-3H3	J41	5.79e-06	0.000649096	8.5369e-05	NaN	9.33937e-07
1672	IPROPOLO2H	92.0938	IPROPOLO + OH	OOCC(C)O	InChI=1S/C3H8O3/c1-3(4)2-6-5/h3-5H,2H2,1H3	J41	5.79e-06	0.000649096	0.00053754	1.36143e-05	5.88069e-06
1673	IPROPOLPER	106.077	CH3CHO + HO2 + OH	OOC(=O)C(C)O	InChI=1S/C3H6O4/c1-2(4)3(5)7-6/h2,4,6H,1H3	J41	5.79e-06	0.000649096	8.5369e-05	NaN	9.33937e-07
1674	ISOP34OOH	118.131	ISOP34O + OH	CC(=C)C(COO)O	InChI=1S/C5H10O3/c1-4(2)5(6)3-8-7/h5-7H,1,3H2,2H3	J41	5.79e-06	0.000649096	0.00053754	1.36143e-05	5.88069e-06
1675	ISOPANO3	147.129	ISOPAO + NO2	OCC(=CCON(=O)=O)C	InChI=1S/C5H9NO4/c1-5(4-7)2-3-10-6(8)9/h2,7H,3-4H2,1H3	J53	1.79e-06	0.000200671	0.000233945	3.89233e-06	2.55936e-06
1676	ISOPAOOH	118.131	ISOPAO + OH	OOCC=C(C)CO	InChI=1S/C5H10O3/c1-5(4-6)2-3-8-7/h2,6-7H,3-4H2,1H3	J41	5.79e-06	0.000649096	0.00053754	1.36143e-05	5.88069e-06
1677	ISOPBNO3	147.129	ISOPBO + NO2	OCC(C)(C=C)ON(=O)=O	InChI=1S/C5H9NO4/c1-3-5(2,4-7)10-6(8)9/h3,7H,1,4H2,2H3	J55	8.33e-06	0.000933847	0.000233945	3.89233e-06	2.55936e-06
1678	ISOPBOOH	118.131	ISOPBO + OH	OCC(C)(OO)C=C	InChI=1S/C5H10O3/c1-3-5(2,4-6)8-7/h3,6-7H,1,4H2,2H3	J41	5.79e-06	0.000649096	0.00053754	1.36143e-05	5.88069e-06
1679	ISOPCNO3	147.129	CISOPCO + NO2	OCC=C(C)CON(=O)=O	InChI=1S/C5H9NO4/c1-5(2-3-7)4-10-6(8)9/h2,7H,3-4H2,1H3	J53	1.79e-06	0.000200671	0.000233945	3.89233e-06	2.55936e-06
1680	ISOPCOOH	118.131	CISOPCO + OH	OOCC(=CCO)C	InChI=1S/C5H10O3/c1-5(2-3-6)4-8-7/h2,6-7H,3-4H2,1H3	J41	5.79e-06	0.000649096	0.000558251	1.36143e-05	6.10727e-06
1681	ISOPDNO3	147.129	ISOPDO + NO2	OCC(ON(=O)=O)C(=C)C	InChI=1S/C5H9NO4/c1-4(2)5(3-7)10-6(8)9/h5,7H,1,3H2,2H3	J54	2.99e-06	0.000335198	1.33512e-05	3.89233e-06	1.46063e-07
1682	ISOPDOOH	118.131	ISOPDO + OH	OCC(OO)C(=C)C	InChI=1S/C5H10O3/c1-4(2)5(3-6)8-7/h5-7H,1,3H2,2H3	J41	5.79e-06	0.000649096	0.00053754	1.36143e-05	5.88069e-06
1683	KLIMONONIC	186.205	C817O2 + HO2	CC(=O)CCC(CC(=O)O)C(=O)C	InChI=1S/C9H14O4/c1-6(10)3-4-8(7(2)11)5-9(12)13/h8H,3-5H2,1-2H3,(H,12,13)	J22.*2	7.96e-06	0.000892368	0.000576	0.00026212	6.30144e-06
1684	LIMAL	168.233	C923O2 + CO + HO2	O=CCC(CCC(=O)C)C(=C)C	InChI=1S/C10H16O2/c1-8(2)10(6-7-11)5-4-9(3)12/h7,10H,1,4-6H2,2-3H3	J15	1.99e-05	0.00223092	0.00217244	0.000551971	2.37665e-05
1685	LIMALACO	182.216	C729CO3 + CH3CO3	O=CCC(CC(=O)C(=O)C)C(=C)C	InChI=1S/C10H14O3/c1-7(2)9(4-5-11)6-10(13)8(3)12/h5,9H,1,4,6H2,2-3H3	J35	0.000268	0.0300445	0.0289352	0.00762916	0.000316551
1686	LIMALAOH	184.232	C729CHO + HO2 + CH3CO3	O=CCC(CC(O)C(=O)C)C(=C)C	InChI=1S/C10H16O3/c1-7(2)9(4-5-11)6-10(13)8(3)12/h5,9-10,13H,1,4,6H2,2-3H3	J22	3.98e-06	0.000446184	0.00217244	0.000551971	2.37665e-05
1687	LIMALAOOH	200.232	C729CHO + OH + CH3CO3+ LIMALAO + OH	O=CCC(CC(OO)C(=O)C)C(=C)C	InChI=1S/C10H16O4/c1-7(2)9(4-5-11)6-10(14-13)8(3)12/h5,9-10,13H,1,4,6H2,2-3H3	J22+J41	9.77e-06	0.00109528	0.00273069	0.000552139	2.98737e-05
1688	LIMALBCO	182.216	C822CO3 + CO + HO2	O=CCC(CCC(=O)C=O)C(=C)C	InChI=1S/C10H14O3/c1-8(2)9(5-6-11)3-4-10(13)7-12/h6-7,9H,1,3-5H2,2H3	J34	0.000125	0.0140133	0.125834	0.0120216	0.00137663
1689	LIMALBOH	184.232	C822CO3 + HCHO + HO2	O=CCC(CCC(=O)CO)C(=C)C	InChI=1S/C10H16O3/c1-8(2)9(5-6-11)3-4-10(13)7-12/h6,9,12H,1,3-5,7H2,2H3	J22	3.98e-06	0.000446184	0.00217244	0.000551971	2.37665e-05
1690	LIMALBOOH	200.232	C822CO3 + HCHO + OH+ LIMALBO + OH	OOCC(=O)CCC(CC=O)C(=C)C	InChI=1S/C10H16O4/c1-8(2)9(5-6-11)3-4-10(12)7-14-13/h6,9,13H,1,3-5,7H2,2H3	J22+J41	9.77e-06	0.00109528	0.00273069	0.000552139	2.98737e-05
1691	LIMALOOH	218.247	LIMALO + OH	O=CCC(CCC(=O)C)C(C)(CO)OO	InChI=1S/C10H18O5/c1-8(13)3-4-9(5-6-11)10(2,7-12)15-14/h6,9,12,14H,3-5,7H2,1-2H3	J41	5.79e-06	0.000649096	0.00266354	0.000565163	2.91391e-05
1692	LIMAOOH	186.248	LIMAO + OH	OOC1(C)CCC(CC1O)C(=C)C	InChI=1S/C10H18O3/c1-7(2)8-4-5-10(3,13-12)9(11)6-8/h8-9,11-12H,1,4-6H2,2-3H3	J41	5.79e-06	0.000649096	0.000558251	1.36143e-05	6.10727e-06
1693	LIMBOOH	186.248	LIMBO + OH	OOC1CC(CCC1(C)O)C(=C)C	InChI=1S/C10H18O3/c1-7(2)8-4-5-10(3,11)9(6-8)13-12/h8-9,11-12H,1,4-6H2,2-3H3	J41	5.79e-06	0.000649096	0.00053754	1.36143e-05	5.88069e-06
1694	LIMCOOH	186.248	LIMCO + OH	OCC(C)(OO)C1CCC(=CC1)C	InChI=1S/C10H18O3/c1-8-3-5-9(6-4-8)10(2,7-11)13-12/h3,9,11-12H,4-7H2,1-2H3	J41	5.79e-06	0.000649096	0.00053754	1.36143e-05	5.88069e-06
1695	LMKAOOH	188.221	LMKAO + OH	OOC1(C)CCC(CC1O)C(=O)C	InChI=1S/C9H16O4/c1-6(10)7-3-4-9(2,13-12)8(11)5-7/h7-8,11-12H,3-5H2,1-2H3	J41	5.79e-06	0.000649096	0.000846251	0.000185846	9.25799e-06
1696	LMKBOOH	188.221	LMKBO + OH	OOC1CC(CCC1(C)O)C(=O)C	InChI=1S/C9H16O4/c1-6(10)7-3-4-9(2,11)8(5-7)13-12/h7-8,11-12H,3-5H2,1-2H3	J41	5.79e-06	0.000649096	0.00082554	0.000185846	9.03141e-06
1697	LMLKACO	184.189	C626CO3 + CH3CO3	O=CCC(CC(=O)C(=O)C)C(=O)C	InChI=1S/C9H12O4/c1-6(11)8(3-4-10)5-9(13)7(2)12/h4,8H,3,5H2,1-2H3	J35	0.000268	0.0300445	0.0307349	0.00764501	0.00033624
1698	LMLKAOH	186.205	C626CHO + HO2 + CH3CO3	O=CCC(CC(O)C(=O)C)C(=O)C	InChI=1S/C9H14O4/c1-6(11)8(3-4-10)5-9(13)7(2)12/h4,8-9,13H,3,5H2,1-2H3	J22	3.98e-06	0.000446184	0.002414	0.000594623	2.64092e-05
1699	LMLKAOOH	202.204	C626CHO + OH + CH3CO3+ LMLKAO + OH	O=CCC(CC(OO)C(=O)C)C(=O)C	InChI=1S/C9H14O5/c1-6(11)8(3-4-10)5-9(14-13)7(2)12/h4,8-9,13H,3,5H2,1-2H3	J22+J41	9.77e-06	0.00109528	0.00297225	0.000594779	3.25164e-05
1700	LMLKBCO	184.189	C731CO3 + CO + HO2	O=CCC(CCC(=O)C=O)C(=O)C	InChI=1S/C9H12O4/c1-7(12)8(4-5-10)2-3-9(13)6-11/h5-6,8H,2-4H2,1H3	J34	0.000125	0.0140133	0.004252	0.000799029	4.65169e-05
1701	LMLKBOH	186.205	C731CO3 + HCHO + HO2	O=CCC(CCC(=O)CO)C(=O)C	InChI=1S/C9H14O4/c1-7(12)8(4-5-10)2-3-9(13)6-11/h5,8,11H,2-4,6H2,1H3	J22	3.98e-06	0.000446184	0.002414	0.000594623	2.64092e-05
1702	LMLKBOOH	202.204	C731CO3 + HCHO + OH+ LMLKBO + OH	OOCC(=O)CCC(CC=O)C(=O)C	InChI=1S/C9H14O5/c1-7(11)8(4-5-10)2-3-9(12)6-14-13/h5,8,13H,2-4,6H2,1H3	J22+J41	9.77e-06	0.00109528	0.00297225	0.000594779	3.25164e-05
1703	LMLKET	170.206	C817O2 + CO + HO2	O=CCC(CCC(=O)C)C(=O)C	InChI=1S/C9H14O3/c1-7(11)3-4-9(5-6-10)8(2)12/h6,9H,3-5H2,1-2H3	J15	1.99e-05	0.00223092	0.002414	0.000594623	2.64092e-05
1704	M22C3CHO	100.159	NEOPO2 + HO2 + CO	O=CCC(C)(C)C	InChI=1S/C6H12O/c1-6(2,3)4-5-7/h5H,4H2,1-3H3	J15	1.99e-05	0.00223092	0.00676923	5.72e-06	7.40554e-05
1705	M22C3CO3H	132.158	NEOPO2 + OH	OOC(=O)CC(C)(C)C	InChI=1S/C6H12O3/c1-6(2,3)4-5(7)9-8/h8H,4H2,1-3H3	J41	5.79e-06	0.000649096	8.5369e-05	NaN	9.33937e-07
1706	M22C43NO3	147.172	M22C43O + NO2	O=N(=O)OC(C)C(C)(C)C	InChI=1S/C6H13NO3/c1-5(6(2,3)4)10-7(8)9/h5H,1-4H3	J54	2.99e-06	0.000335198	0.00019272	3.23144e-05	2.10836e-06
1707	M22C43OOH	118.174	M22C43O + OH	OOC(C)C(C)(C)C	InChI=1S/C6H14O2/c1-5(8-7)6(2,3)4/h5,7H,1-4H3	J41	5.79e-06	0.000649096	0.000558251	1.36143e-05	6.10727e-06
1708	M22C4NO3	147.172	M22C4O + NO2	O=N(=O)OCCC(C)(C)C	InChI=1S/C6H13NO3/c1-6(2,3)4-5-10-7(8)9/h4-5H2,1-3H3	J53	1.79e-06	0.000200671	0.00019272	3.23144e-05	2.10836e-06
1709	M22C4OOH	118.174	M22C4O + OH	OOCCC(C)(C)C	InChI=1S/C6H14O2/c1-6(2,3)4-5-8-7/h7H,4-5H2,1-3H3	J41	5.79e-06	0.000649096	0.000558251	1.36143e-05	6.10727e-06
1710	M23C43NO3	147.172	M23C43O + NO2	O=N(=O)OC(C)(C)C(C)C	InChI=1S/C6H13NO3/c1-5(2)6(3,4)10-7(8)9/h5H,1-4H3	J55	8.33e-06	0.000933847	0.00019272	3.23144e-05	2.10836e-06
1711	M23C43OOH	118.174	M23C43O + OH	OOC(C)(C)C(C)C	InChI=1S/C6H14O2/c1-5(2)6(3,4)8-7/h5,7H,1-4H3	J41	5.79e-06	0.000649096	0.000558251	1.36143e-05	6.10727e-06
1712	M23C4NO3	147.172	M23C4O + NO2	O=N(=O)OCC(C)C(C)C	InChI=1S/C6H13NO3/c1-5(2)6(3)4-10-7(8)9/h5-6H,4H2,1-3H3	J53	1.79e-06	0.000200671	0.00019272	3.23144e-05	2.10836e-06
1713	M23C4OOH	118.174	M23C4O + OH	OOCC(C)C(C)C	InChI=1S/C6H14O2/c1-5(2)6(3)4-8-7/h5-7H,4H2,1-3H3	J41	5.79e-06	0.000649096	0.000558251	1.36143e-05	6.10727e-06
1714	M2BK	100.159	CH3CO3 + SC4H9O2	CCC(C)C(=O)C	InChI=1S/C6H12O/c1-4-5(2)6(3)7/h5H,4H2,1-3H3	J22	3.98e-06	0.000446184	0.00278425	0.0004314	3.04597e-05
1715	M2BKANO3	161.156	M2BKAO + NO2+ M2BKAO + NO2	O=N(=O)OC(C)C(C)C(=O)C	InChI=1S/C6H11NO4/c1-4(5(2)8)6(3)11-7(9)10/h4,6H,1-3H3	J54+J22	6.97e-06	0.000781382	0.00465	0.000743034	5.0871e-05
1716	M2BKAOOH	132.158	M2BKAO + OH+ M2BKAO + OH	OOC(C)C(C)C(=O)C	InChI=1S/C6H12O3/c1-4(5(2)7)6(3)9-8/h4,6,8H,1-3H3	J41+J22	9.77e-06	0.00109528	0.000991251	0.000431615	1.08443e-05
1717	M2BKBOH	116.158	CH3CO3 + MEK + HO2	CCC(C)(O)C(=O)C	InChI=1S/C6H12O2/c1-4-6(3,8)5(2)7/h8H,4H2,1-3H3	J22	3.98e-06	0.000446184	0.000433	0.0004314	4.73702e-06
1718	M2BKBOOH	132.158	M2BKBO + OH+ M2BKBO + OH	CCC(C)(OO)C(=O)C	InChI=1S/C6H12O3/c1-4-6(3,9-8)5(2)7/h8H,4H2,1-3H3	J41+J22	9.77e-06	0.00109528	0.000991251	0.000431615	1.08443e-05
1719	M2BU2OLOOH	120.147	ME2BU2OLO + OH	OOC(C)C(C)(C)O	InChI=1S/C5H12O3/c1-4(8-7)5(2,3)6/h4,6-7H,1-3H3	J41	5.79e-06	0.000649096	0.00053754	1.36143e-05	5.88069e-06
1720	M2BUOL2OOH	120.147	M2BUOL2O + OH	CCC(C)(CO)OO	InChI=1S/C5H12O3/c1-3-5(2,4-6)8-7/h6-7H,3-4H2,1-2H3	J41	5.79e-06	0.000649096	0.00053754	1.36143e-05	5.88069e-06
1721	M2C43CHO	100.159	IPEBO2 + HO2 + CO	O=CC(C)C(C)C	InChI=1S/C6H12O/c1-5(2)6(3)4-7/h4-6H,1-3H3	J17	5.5e-05	0.00616586	0.00676923	5.72e-06	7.40554e-05
1722	M2C43CO3H	132.158	IPEBO2 + OH	OOC(=O)C(C)C(C)C	InChI=1S/C6H12O3/c1-4(2)5(3)6(7)9-8/h4-5,8H,1-3H3	J41	5.79e-06	0.000649096	8.5369e-05	NaN	9.33937e-07
1723	M2CO5C6	114.186	CH3CO3 + IPEAO2	CC(C)CCC(=O)C	InChI=1S/C7H14O/c1-6(2)4-5-7(3)8/h6H,4-5H2,1-3H3	J22	3.98e-06	0.000446184	0.00263925	0.000185347	2.88734e-05
1724	M2HEXANO3	161.199	M2HEXAO + NO2	CC(C)CCC(C)ON(=O)=O	InChI=1S/C7H15NO3/c1-6(2)4-5-7(3)11-8(9)10/h6-7H,4-5H2,1-3H3	J54	2.99e-06	0.000335198	0.00019272	3.23144e-05	2.10836e-06
1725	M2HEXAOOH	132.201	M2HEXAO + OH	OOC(C)CCC(C)C	InChI=1S/C7H16O2/c1-6(2)4-5-7(3)9-8/h6-8H,4-5H2,1-3H3	J41	5.79e-06	0.000649096	0.000558251	1.36143e-05	6.10727e-06
1726	M2HEXBNO3	161.199	M2HEXBO + NO2	CCCCC(C)(C)ON(=O)=O	InChI=1S/C7H15NO3/c1-4-5-6-7(2,3)11-8(9)10/h4-6H2,1-3H3	J55	8.33e-06	0.000933847	0.00019272	3.23144e-05	2.10836e-06
1727	M2HEXBOOH	132.201	M2HEXBO + OH	CCCCC(C)(C)OO	InChI=1S/C7H16O2/c1-4-5-6-7(2,3)9-8/h8H,4-6H2,1-3H3	J41	5.79e-06	0.000649096	0.000558251	1.36143e-05	6.10727e-06
1728	M2PEANO3	147.172	M2PEAO + NO2	CCCC(C)CON(=O)=O	InChI=1S/C6H13NO3/c1-3-4-6(2)5-10-7(8)9/h6H,3-5H2,1-2H3	J53	1.79e-06	0.000200671	0.00019272	3.23144e-05	2.10836e-06
1729	M2PEAOOH	118.174	M2PEAO + OH	CCCC(C)COO	InChI=1S/C6H14O2/c1-3-4-6(2)5-8-7/h6-7H,3-5H2,1-2H3	J41	5.79e-06	0.000649096	0.000558251	1.36143e-05	6.10727e-06
1730	M2PEBNO3	147.172	M2PEBO + NO2	CC(C)CC(C)ON(=O)=O	InChI=1S/C6H13NO3/c1-5(2)4-6(3)10-7(8)9/h5-6H,4H2,1-3H3	J54	2.99e-06	0.000335198	0.00019272	3.23144e-05	2.10836e-06
1731	M2PEBOOH	118.174	M2PEBO + OH	OOC(C)CC(C)C	InChI=1S/C6H14O2/c1-5(2)4-6(3)8-7/h5-7H,4H2,1-3H3	J41	5.79e-06	0.000649096	0.000558251	1.36143e-05	6.10727e-06
1732	M2PECNO3	147.172	M2PECO + NO2	CCC(ON(=O)=O)C(C)C	InChI=1S/C6H13NO3/c1-4-6(5(2)3)10-7(8)9/h5-6H,4H2,1-3H3	J54	2.99e-06	0.000335198	0.00019272	3.23144e-05	2.10836e-06
1733	M2PECOOH	118.174	M2PECO + OH	CCC(OO)C(C)C	InChI=1S/C6H14O2/c1-4-6(8-7)5(2)3/h5-7H,4H2,1-3H3	J41	5.79e-06	0.000649096	0.000558251	1.36143e-05	6.10727e-06
1734	M2PEDNO3	147.172	M2PEDO + NO2	CCCC(C)(C)ON(=O)=O	InChI=1S/C6H13NO3/c1-4-5-6(2,3)10-7(8)9/h4-5H2,1-3H3	J55	8.33e-06	0.000933847	0.00019272	3.23144e-05	2.10836e-06
1735	M2PEDOOH	118.174	M2PEDO + OH	CCCC(C)(C)OO	InChI=1S/C6H14O2/c1-4-5-6(2,3)8-7/h7H,4-5H2,1-3H3	J41	5.79e-06	0.000649096	0.000558251	1.36143e-05	6.10727e-06
1736	M33C3CHO	100.159	IPECO2 + HO2 + CO	CCC(C)(C)C=O	InChI=1S/C6H12O/c1-4-6(2,3)5-7/h5H,4H2,1-3H3	J17	5.5e-05	0.00616586	0.00676923	5.72e-06	7.40554e-05
1737	M33C3CO3H	132.158	IPECO2 + OH	OOC(=O)C(C)(C)CC	InChI=1S/C6H12O3/c1-4-6(2,3)5(7)9-8/h8H,4H2,1-3H3	J41	5.79e-06	0.000649096	8.5369e-05	NaN	9.33937e-07
1738	M33C4NO3	147.172	M33C4O + NO2	CCC(C)(C)CON(=O)=O	InChI=1S/C6H13NO3/c1-4-6(2,3)5-10-7(8)9/h4-5H2,1-3H3	J53	1.79e-06	0.000200671	0.00019272	3.23144e-05	2.10836e-06
1739	M33C4OOH	118.174	M33C4O + OH	OOCC(C)(C)CC	InChI=1S/C6H14O2/c1-4-6(2,3)5-8-7/h7H,4-5H2,1-3H3	J41	5.79e-06	0.000649096	0.000558251	1.36143e-05	6.10727e-06
1740	M3BU2OLNO3	149.145	ME3BU2OLO + NO2	O=N(=O)OCC(O)C(C)C	InChI=1S/C5H11NO4/c1-4(2)5(7)3-10-6(8)9/h4-5,7H,3H2,1-2H3	J53	1.79e-06	0.000200671	1.33512e-05	3.89233e-06	1.46063e-07
1741	M3BU2OLOOH	120.147	ME3BU2OLO + OH	OOCC(O)C(C)C	InChI=1S/C5H12O3/c1-4(2)5(6)3-8-7/h4-7H,3H2,1-2H3	J41	5.79e-06	0.000649096	0.00053754	1.36143e-05	5.88069e-06
1742	M3BU3ECO3H	116.115	C45O2 + OH	CC(=C)CC(=O)OO	InChI=1S/C5H8O3/c1-4(2)3-5(6)8-7/h7H,1,3H2,2H3	J41	5.79e-06	0.000649096	8.5369e-05	NaN	9.33937e-07
1743	M3C4CHO	100.159	IPEAO2 + HO2 + CO	CC(CC=O)CC	InChI=1S/C6H12O/c1-3-6(2)4-5-7/h5-6H,3-4H2,1-2H3	J15	1.99e-05	0.00223092	0.00221	5.72e-06	2.41774e-05
1744	M3C4CO3H	132.158	IPEAO2 + OH	CC(CC(=O)OO)CC	InChI=1S/C6H12O3/c1-3-5(2)4-6(7)9-8/h5,8H,3-4H2,1-2H3	J41	5.79e-06	0.000649096	0.000433	0.0004314	4.73702e-06
1745	M3CO245C6	142.153	CH3CO3 + C41CO3+ CH3CO3 + CO23C54O2	CC(=O)C(=O)C(C)C(=O)C	InChI=1S/C7H10O3/c1-4(5(2)8)7(10)6(3)9/h4H,1-3H3	J35+J22	0.00027198	0.0304907	0.0288969	0.00762636	0.000316133
1746	M3CO25C6	128.169	CH3CO3 + CO2C54O2+ CH3CO3 + MIPKBO2	CC(=O)CC(C)C(=O)C	InChI=1S/C7H12O2/c1-5(7(3)9)4-6(2)8/h5H,4H2,1-3H3	J22+J22	7.96e-06	0.000892368	0.000576	0.00026212	6.30144e-06
1747	M3CO5C6	114.186	CH3CO3 + IPEAO2	CCC(C)CC(=O)C	InChI=1S/C7H14O/c1-4-6(2)5-7(3)8/h6H,4-5H2,1-3H3	J22	3.98e-06	0.000446184	0.00263925	0.000185347	2.88734e-05
1748	M3HEXANO3	161.199	M3HEXAO + NO2	CCC(C)CC(C)ON(=O)=O	InChI=1S/C7H15NO3/c1-4-6(2)5-7(3)11-8(9)10/h6-7H,4-5H2,1-3H3	J54	2.99e-06	0.000335198	0.00019272	3.23144e-05	2.10836e-06
1749	M3HEXAOOH	132.201	M3HEXAO + OH	CCC(C)CC(C)OO	InChI=1S/C7H16O2/c1-4-6(2)5-7(3)9-8/h6-8H,4-5H2,1-3H3	J41	5.79e-06	0.000649096	0.000558251	1.36143e-05	6.10727e-06
1750	M3HEXBNO3	161.199	M3HEXBO + NO2	CCCC(C)(CC)ON(=O)=O	InChI=1S/C7H15NO3/c1-4-6-7(3,5-2)11-8(9)10/h4-6H2,1-3H3	J55	8.33e-06	0.000933847	0.00019272	3.23144e-05	2.10836e-06
1751	M3HEXBOOH	132.201	M3HEXBO + OH	CCCC(C)(CC)OO	InChI=1S/C7H16O2/c1-4-6-7(3,5-2)9-8/h8H,4-6H2,1-3H3	J41	5.79e-06	0.000649096	0.000558251	1.36143e-05	6.10727e-06
1752	M3PEANO3	147.172	M3PEAO + NO2	CCC(C)CCON(=O)=O	InChI=1S/C6H13NO3/c1-3-6(2)4-5-10-7(8)9/h6H,3-5H2,1-2H3	J53	1.79e-06	0.000200671	0.00019272	3.23144e-05	2.10836e-06
1753	M3PEAOOH	118.174	M3PEAO + OH	CC(CCOO)CC	InChI=1S/C6H14O2/c1-3-6(2)4-5-8-7/h6-7H,3-5H2,1-2H3	J41	5.79e-06	0.000649096	0.000558251	1.36143e-05	6.10727e-06
1754	M3PEBNO3	147.172	M3PEBO + NO2	CCC(C)C(C)ON(=O)=O	InChI=1S/C6H13NO3/c1-4-5(2)6(3)10-7(8)9/h5-6H,4H2,1-3H3	J54	2.99e-06	0.000335198	0.00019272	3.23144e-05	2.10836e-06
1755	M3PEBOOH	118.174	M3PEBO + OH	CCC(C)C(C)OO	InChI=1S/C6H14O2/c1-4-5(2)6(3)8-7/h5-7H,4H2,1-3H3	J41	5.79e-06	0.000649096	0.000558251	1.36143e-05	6.10727e-06
1756	M3PECNO3	147.172	M3PECO + NO2	CCC(C)(CC)ON(=O)=O	InChI=1S/C6H13NO3/c1-4-6(3,5-2)10-7(8)9/h4-5H2,1-3H3	J55	8.33e-06	0.000933847	0.00019272	3.23144e-05	2.10836e-06
1757	M3PECOOH	118.174	M3PECO + OH	CCC(C)(CC)OO	InChI=1S/C6H14O2/c1-4-6(3,5-2)8-7/h7H,4-5H2,1-3H3	J41	5.79e-06	0.000649096	0.000558251	1.36143e-05	6.10727e-06
1758	MACO3H	102.089	CH3C2H2O2 + OH	CC(=C)C(=O)OO	InChI=1S/C4H6O3/c1-3(2)4(5)7-6/h6H,1H2,2H3	J41	5.79e-06	0.000649096	8.5369e-05	NaN	9.33937e-07
1759	MACR	70.0898	CH3C2H2O2 + CO + HO2+ MACO3 + HO2	CC(=C)C=O	InChI=1S/C4H6O/c1-4(2)3-5/h3H,1H2,2H3	J18+J19	2.2e-06	0.000246634	0.000522525	0.000115513	5.71642e-06
1760	MACRNB	149.102	C3MDIALOH + HO2 + NO2	O=CC(C)(O)CON(=O)=O	InChI=1S/C4H7NO5/c1-4(7,2-6)3-10-5(8)9/h2,7H,3H2,1H3	J56.*1.6	5.056e-05	0.0056681	0.0144816	0.00400026	0.000158429
1761	MACRNBCO3H	165.101	NOA + HO2 + OH	O=N(=O)OCC(C)(O)C(=O)O	InChI=1S/C4H7NO6/c1-4(8,3(6)7)2-11-5(9)10/h8H,2H2,1H3,(H,6,7)	J41	5.79e-06	0.000649096	0.000191843	1.89503e-05	2.09876e-06
1762	MACRNCO3H	181.101	ACETOL + NO2 + OH	OOC(=O)C(C)(CO)ON(=O)=O	InChI=1S/C4H7NO7/c1-4(2-6,3(7)11-10)12-5(8)9/h6,10H,2H2,1H3	J41	5.79e-06	0.000649096	9.63175e-05	1.89503e-05	1.05371e-06
1763	MACRNO3	149.102	ACETOL + NO2 + CO + HO2	OCC(C)(C=O)ON(=O)=O	InChI=1S/C4H7NO5/c1-4(2-6,3-7)10-5(8)9/h2,7H,3H2,1H3	J56.*10	0.000316	0.0354256	0.0144816	0.00400026	0.000158429
1764	MACROH	104.105	ACETOL + CO + HO2 + HO2	CC(O)(CO)C=O	InChI=1S/C4H8O3/c1-4(7,2-5)3-6/h2,6-7H,3H2,1H3	J17	5.5e-05	0.00616586	0.00188	0.000113	2.05672e-05
1765	MACROHOOH	120.104	IBUTALOH + CO + HO2 + OH+ MACROHO + OH	CC(O)(COO)C=O	InChI=1S/C4H8O4/c1-4(6,2-5)3-8-7/h2,6-7H,3H2,1H3	J17+J41	6.079e-05	0.00681495	0.00241754	0.000113817	2.64479e-05
1766	MACROOH	120.104	ACETOL + CO + HO2 + OH+ MACRO + OH	OCC(C)(OO)C=O	InChI=1S/C4H8O4/c1-4(2-5,3-6)8-7/h2,6-7H,3H2,1H3	J17+J41	6.079e-05	0.00681495	0.00241754	0.000113817	2.64479e-05
1767	MALANHYOOH	148.071	MALANHYO + OH	OOC1C(=O)OC(=O)C1O	InChI=1S/C4H4O6/c5-1-2(10-8)4(7)9-3(1)6/h1-2,5,8H	J41	5.79e-06	0.000649096	0.00144154	4.79867e-05	1.57704e-05
1768	MALDALCO2H	100.073	HCOCO2H + HO2 + CO + HO2 + CO+ HCOCO2H + HO2 + CO + HO2 + CO	O=CC=CC(=O)O	InChI=1S/C4H4O3/c5-3-1-2-4(6)7/h1-3H,(H,6,7)	J18+J19	2.2e-06	0.000246634	0.000522525	0.000115513	5.71642e-06
1769	MALDALCO3H	116.072	MALDIALCO2 + OH	OOC(=O)C=CC=O	InChI=1S/C4H4O4/c5-3-1-2-4(6)8-7/h1-3,7H	J20.*2	0.001128	0.126456	0.000607894	0.000115513	6.65036e-06
1770	MALDIAL	84.0734	BZFUONE+ MALDIALCO3 + HO2	O=CC=CC=O	InChI=1S/C4H4O2/c5-3-1-2-4-6/h1-4H	J4.*0.14.*0.4+J4.*0.14.*0.6	0.0012488	0.139999	0.1345	0.0324183	0.00147143
1771	MALDIALOOH	134.087	C32OH13CO + CO + OH + HO2+ MALDIALO + OH	OOC(C=O)C(O)C=O	InChI=1S/C4H6O5/c5-1-3(7)4(2-6)9-8/h1-4,7-8H	J15.*2+J41	4.559e-05	0.00511093	0.00429754	0.000160385	4.70151e-05
1772	MBKCOOHOOH	162.141	MIBKCOOHO + OH+ MIBKCOOHO + OH	CC(O)(COO)C(=O)C(=O)C	InChI=1S/C6H10O5/c1-4(7)5(8)6(2,9)3-11-10/h9-10H,3H2,1-2H3	J41+J35	0.00027379	0.0306936	0.0291465	0.00762412	0.000318863
1773	MBOACO	118.131	HCHO + HO2 + IPRHOCO3	OCC(=O)C(C)(C)O	InChI=1S/C5H10O3/c1-5(2,8)4(7)3-6/h6,8H,3H2,1-2H3	J22	3.98e-06	0.000446184	0.000194	7.13594e-05	2.12236e-06
1774	MBOAOOH	136.146	MBOAO + OH	OCC(OO)C(C)(C)O	InChI=1S/C5H12O4/c1-5(2,7)4(3-6)9-8/h4,6-8H,3H2,1-2H3	J41	5.79e-06	0.000649096	0.00053754	1.36143e-05	5.88069e-06
1775	MBOBCO	118.131	CO + HO2 + HO2 + IBUTALOH	O=CC(O)C(C)(C)O	InChI=1S/C5H10O3/c1-5(2,8)4(7)3-6/h3-4,7-8H,1-2H3	J17	5.5e-05	0.00616586	0.00165	4.27e-06	1.8051e-05
1776	MBOBOOH	136.146	MBOBO + OH	OOCC(O)C(C)(C)O	InChI=1S/C5H12O4/c1-5(2,7)4(6)3-9-8/h4,6-8H,3H2,1-2H3	J41	5.79e-06	0.000649096	0.00053754	1.36143e-05	5.88069e-06
1777	MBOCOCO	116.115	CO + HO2 + IPRHOCO3	O=CC(=O)C(C)(C)O	InChI=1S/C5H8O3/c1-5(2,8)4(7)3-6/h3,8H,1-2H3	J34	0.000125	0.0140133	0.001844	7.1487e-05	2.01734e-05
1778	MC3ODBCO2H	114.099	CH3COCO2H + HO2 + CO + HO2 + CO+ CH3COCO2H + HO2 + CO + HO2 + CO	O=CC=C(C)C(=O)O	InChI=1S/C5H6O3/c1-4(2-3-6)5(7)8/h2-3H,1H3,(H,7,8)	J18+J19	2.2e-06	0.000246634	0.000326281	0.000277531	3.56951e-06
1779	MC52CO2OH	146.141	CO2H3CHO + CH3CO3 + HO2+ CO2H3CHO + CH3CO3 + HO2	O=CC(O)C(C)(O)C(=O)C	InChI=1S/C6H10O4/c1-4(8)6(2,10)5(9)3-7/h3,5,9-10H,1-2H3	J22+J17	5.898e-05	0.00661204	0.002643	0.000431438	2.89144e-05
1780	MC5COOHOOH	162.141	CO2H3CHO + CH3CO3 + OH+ CO2H3CHO + CH3CO3 + OH+ MC5CO2OHO + OH	O=CC(O)C(C)(OO)C(=O)C	InChI=1S/C6H10O5/c1-4(8)6(2,11-10)5(9)3-7/h3,5,9-10H,1-2H3	J22+J17+J41	6.477e-05	0.00726114	0.00318054	0.000431653	3.47951e-05
1781	MC5DICARB	112.126	MC4CODBCO3 + HO2+ TMB1FUONE	O=CC=C(C)C(=O)C	InChI=1S/C6H8O2/c1-5(3-4-7)6(2)8/h3-4H,1-2H3	J4.*0.2.*0.6+J4.*0.2.*0.4	0.001784	0.199998	0.00254444	0.000140838	2.78362e-05
1782	MC6CO2OH	142.153	C4MCO2OH + HO2 + CO + HO2 + CO+ C4MCO2OH + HO2 + CO + HO2 + CO+ C5DICARB + CH3CO3 + HO2	O=CC=CC(C)(O)C(=O)C	InChI=1S/C7H10O3/c1-6(9)7(2,10)4-3-5-8/h3-5,10H,1-2H3	J18+J19+J22	6.18e-06	0.000692818	0.00137444	0.00021762	1.50364e-05
1783	MC6CO2OOH	158.152	C4MCO2OOH + HO2 + CO + HO2 + CO+ C4MCO2OOH + HO2 + CO + HO2 + CO+ CH3CO3 + C5DICARB + OH+ MC6CO2O + OH	O=CC=CC(C)(OO)C(=O)C	InChI=1S/C7H10O4/c1-6(9)7(2,11-10)4-3-5-8/h3-5,10H,1-2H3	J18+J19+J22+J41	1.197e-05	0.00134191	0.00193269	0.000218046	2.11436e-05
1784	MC6OTKTOOH	190.151	OH + MC6OTKETO	OOC(C)(OC(=O)C(=O)C)C(=O)C	InChI=1S/C7H10O6/c1-4(8)6(10)12-7(3,13-11)5(2)9/h11H,1-3H3	J41	5.79e-06	0.000649096	0.0294552	0.00762637	0.00032224
1785	MC6OTRIKET	158.152	CH3CO3 + MEKBO2	CC(OC(=O)C(=O)C)C(=O)C	InChI=1S/C7H10O4/c1-4(8)6(3)11-7(10)5(2)9/h6H,1-3H3	J22	3.98e-06	0.000446184	0.0288969	0.00762636	0.000316133
1786	MC7CO2OH	156.179	C5DICARB + C2H5CO3 + HO2+ MC7CO2O + HO2+ MC7CO2O + HO2	CC(O)(C=CC=O)C(=O)CC	InChI=1S/C8H12O3/c1-3-7(10)8(2,11)5-4-6-9/h4-6,11H,3H2,1-2H3	J22+J18+J19	6.18e-06	0.000692818	0.00217244	0.000551971	2.37665e-05
1787	MC7CO2OOH	172.179	C5DICARB + C2H5CO3 + OH+ MC7CO2O + OH+ MC7CO2O + OH+ MC7CO2O + OH	CC(OO)(C=CC=O)C(=O)CC	InChI=1S/C8H12O4/c1-3-7(10)8(2,12-11)5-4-6-9/h4-6,11H,3H2,1-2H3	J22+J41+J18+J19	1.197e-05	0.00134191	0.00273069	0.000552139	2.98737e-05
1788	MCATEC1OOH	140.137	MCATEC1O + OH	OOc1c(C)cccc1O	InChI=1S/C7H8O3/c1-5-3-2-4-6(8)7(5)10-9/h2-4,8-9H,1H3	J41	5.79e-06	0.000649096	0.00053754	1.36143e-05	5.88069e-06
1789	MCOCOMOOOH	134.087	CH3CO3 + HCHO + OH+ MCOCOMOXO + OH	CC(=O)C(=O)OCOO	InChI=1S/C4H6O5/c1-3(5)4(6)8-2-9-7/h7H,2H2,1H3	J22+J41	9.77e-06	0.00109528	0.0237761	0.0232179	0.000260111
1790	MCOCOMOX	102.089	CH3CO3 + CH3O2	COC(=O)C(=O)C	InChI=1S/C4H6O3/c1-3(5)4(6)7-2/h1-2H3	J22	3.98e-06	0.000446184	0.0232179	0.0232179	0.000254004
1791	MCOOTBNO3	177.155	MCOOTBO + NO2	O=N(=O)OCC(C)(C)OC(=O)C	InChI=1S/C6H11NO5/c1-5(8)12-6(2,3)4-11-7(9)10/h4H2,1-3H3	J53	1.79e-06	0.000200671	0.00465	0.000743034	5.0871e-05
1792	MCOOTBOOH	148.157	MCOOTBO + OH	OOCC(C)(C)OC(=O)C	InChI=1S/C6H12O4/c1-5(7)10-6(2,3)4-9-8/h8H,4H2,1-3H3	J41	5.79e-06	0.000649096	0.000991251	0.000431615	1.08443e-05
1793	ME2BUOLOOH	120.147	ME2BUOLO + OH	OOC(C)(C)C(C)O	InChI=1S/C5H12O3/c1-4(6)5(2,3)8-7/h4,6-7H,1-3H3	J41	5.79e-06	0.000649096	0.00053754	1.36143e-05	5.88069e-06
1794	ME3BU3ECHO	84.1164	C45O2 + CO + HO2	CC(=C)CC=O	InChI=1S/C5H8O/c1-5(2)3-4-6/h4H,1,3H2,2H3	J15	1.99e-05	0.00223092	0.000326281	0.000277531	3.56951e-06
1795	ME3BUOLOOH	120.147	ME3BUOLO + OH	OCC(OO)C(C)C	InChI=1S/C5H12O3/c1-4(2)5(3-6)8-7/h4-7H,3H2,1-2H3	J41	5.79e-06	0.000649096	0.00053754	1.36143e-05	5.88069e-06
1796	ME3CO2BUOL	102.132	HOCH2CO3 + IC3H7O2	OCC(=O)C(C)C	InChI=1S/C5H10O2/c1-4(2)5(7)3-6/h4,6H,3H2,1-2H3	J22	3.98e-06	0.000446184	0.000194	7.13594e-05	2.12236e-06
1797	MEBFUOOH	176.167	MEBFUO + OH	CC1(OO)C(O)C(CC)OC1=O	InChI=1S/C7H12O5/c1-3-4-5(8)7(2,12-10)6(9)11-4/h4-5,8,10H,3H2,1-2H3	J41	5.79e-06	0.000649096	0.00082554	0.000185846	9.03141e-06
1798	MECOACEOOH	134.087	MECOACETO + OH	CC(=O)OC(=O)COO	InChI=1S/C4H6O5/c1-3(5)9-4(6)2-8-7/h7H,2H2,1H3	J41	5.79e-06	0.000649096	0.00146225	4.79867e-05	1.5997e-05
1799	MECOFOROOH	120.061	MECOFORMO + OH	OOCC(=O)OC=O	InChI=1S/C3H4O5/c4-2-7-3(5)1-8-6/h2,6H,1H2	J41	5.79e-06	0.000649096	0.000630851	2.61748e-05	6.90151e-06
1800	MEK	72.1057	CH3CO3 + C2H5O2	CCC(=O)C	InChI=1S/C4H8O/c1-3-4(2)5/h3H2,1-2H3	J22	3.98e-06	0.000446184	0.000452	3.25375e-05	4.94488e-06
1801	MEKANO3	133.103	MEKAO + NO2+ MEKAO + NO2	CC(=O)CCON(=O)=O	InChI=1S/C4H7NO4/c1-4(6)2-3-9-5(7)8/h2-3H2,1H3	J53+J22	5.77e-06	0.000646854	0.00448667	0.0022266	4.90841e-05
1802	MEKAOH	88.1051	HOCH2CH2O2 + CH3CO3	CC(=O)CCO	InChI=1S/C4H8O2/c1-4(6)2-3-5/h5H,2-3H2,1H3	J22	3.98e-06	0.000446184	0.000452	3.25375e-05	4.94488e-06
1803	MEKAOOH	104.105	MEKAO + OH+ MEKAO + OH	OOCCC(=O)C	InChI=1S/C4H8O3/c1-4(5)2-3-7-6/h6H,2-3H2,1H3	J41+J22	9.77e-06	0.00109528	0.00101025	3.52709e-05	1.10521e-05
1804	MEKBOOH	104.105	CH3CO3 + CH3CHO + OH+ MEKBO + OH	CC(OO)C(=O)C	InChI=1S/C4H8O3/c1-3(5)4(2)7-6/h4,6H,1-2H3	J22+J41	9.77e-06	0.00109528	0.00101025	3.52709e-05	1.10521e-05
1805	MEKCOH	88.1051	C2H5CO3 + HCHO + HO2	CCC(=O)CO	InChI=1S/C4H8O2/c1-2-4(6)3-5/h5H,2-3H2,1H3	J22	3.98e-06	0.000446184	0.000452	3.25375e-05	4.94488e-06
1806	MEKCOOH	104.105	C2H5CO3 + HCHO + OH+ MEKCO + OH	CCC(=O)COO	InChI=1S/C4H8O3/c1-2-4(5)3-7-6/h6H,2-3H2,1H3	J22+J41	9.77e-06	0.00109528	0.00101025	3.52709e-05	1.10521e-05
1807	MEMOXYCHO	74.0785	HO2 + CO + CH3OCH2O2	COCC=O	InChI=1S/C3H6O2/c1-5-3-2-4/h2H,3H2,1H3	J15	1.99e-05	0.00223092	0.00241	0.00231	2.63654e-05
1808	MEMOXYCO3H	106.077	CH3OCH2O2 + OH	COCC(=O)OO	InChI=1S/C3H6O4/c1-6-2-3(4)7-5/h5H,2H2,1H3	J41	5.79e-06	0.000649096	8.5369e-05	NaN	9.33937e-07
1809	MET1OOH	152.19	MET1O + OH	CCc1cc(C)ccc1OO	InChI=1S/C9H12O2/c1-3-8-6-7(2)4-5-9(8)11-10/h4-6,10H,3H2,1-2H3	J41	5.79e-06	0.000649096	0.000558251	1.36143e-05	6.10727e-06
1810	METACETNO3	135.076	METHACETO + NO2	CC(=O)OCON(=O)=O	InChI=1S/C3H5NO5/c1-3(5)8-2-9-4(6)7/h2H2,1H3	J53	1.79e-06	0.000200671	0.00399917	0.000867	4.37509e-05
1811	METACETO2H	106.077	METHACETO + OH	CC(=O)OCOO	InChI=1S/C3H6O4/c1-3(4)6-2-7-5/h5H,2H2,1H3	J41	5.79e-06	0.000649096	0.000630851	2.61748e-05	6.90151e-06
1812	METLBIPNO3	231.203	METLBIPRO + NO2	CCC12OOC(C)(C=CC1ON(=O)=O)C2O	InChI=1S/C9H13NO6/c1-3-9-6(14-10(12)13)4-5-8(2,7(9)11)15-16-9/h4-7,11H,3H2,1-2H3	J55	8.33e-06	0.000933847	6.8088e-05	3.23144e-05	7.44882e-07
1813	METLBPROOH	202.204	METLBIPRO + OH	OOC1C=CC2(C)OOC1(CC)C2O	InChI=1S/C9H14O5/c1-3-9-6(12-11)4-5-8(2,7(9)10)13-14-9/h4-7,10-11H,3H2,1-2H3	J41	5.79e-06	0.000649096	0.00107508	1.92535e-05	1.17614e-05
1814	METLMUCCO	200.189	EPXMC4DIAL + HO2 + CO + C2H5CO3+ EPXMC4DIAL + HO2 + CO + C2H5CO3	CC1(OC1C(O)C(=O)C(=O)CC)C=O	InChI=1S/C9H12O5/c1-3-5(11)6(12)7(13)8-9(2,4-10)14-8/h4,7-8,13H,3H2,1-2H3	J17+J35	0.000323	0.0362104	0.0304469	0.00764277	0.00033309
1815	METLMUCNO3	247.202	EPXMC4DIAL + NO2 + C2H5CO3 + HO2+ EPXMC4DIAL + NO2 + C2H5CO3 + HO2	CCC(=O)C(ON(=O)=O)C(O)C1OC1(C)C=O	InChI=1S/C9H13NO7/c1-3-5(12)7(17-10(14)15)6(13)8-9(2,4-11)16-8/h4,6-8,13H,3H2,1-2H3	J17+J22	5.898e-05	0.00661204	0.00384726	0.00091486	4.20891e-05
1816	METLMUCO2H	184.189	C826CO3O2 + HO2+ C826CO3O2 + HO2	CC1(OC1C=CC(=O)CC)C(=O)O	InChI=1S/C9H12O4/c1-3-6(10)4-5-7-9(2,13-7)8(11)12/h4-5,7H,3H2,1-2H3,(H,11,12)	J23+J24	3.6e-06	0.000403583	0.000334439	0.000140722	3.65876e-06
1817	METLMUCO3H	200.189	C826CO3O2 + OH+ C826CO3O2 + OH+ C826CO3O2 + OH	CCC(=O)C=CC1OC1(C)C(=O)OO	InChI=1S/C9H12O5/c1-3-6(10)4-5-7-9(2,13-7)8(11)14-12/h4-5,7,12H,3H2,1-2H3	J41+J23+J24	9.39e-06	0.00105268	0.000419808	0.000140722	4.5927e-06
1818	METLMUCOH	202.204	METLMUCO + HO2+ METLMUCO + HO2	CC1(OC1C(O)C(O)C(=O)CC)C=O	InChI=1S/C9H14O5/c1-3-5(11)6(12)7(13)8-9(2,4-10)14-8/h4,6-8,12-13H,3H2,1-2H3	J17+J22	5.898e-05	0.00661204	0.002126	0.000564999	2.32584e-05
1819	METLMUCOOH	218.204	METLMUCO + OH+ METLMUCO + OH+ METLMUCO + OH	CC1(OC1C(O)C(OO)C(=O)CC)C=O	InChI=1S/C9H14O6/c1-3-5(11)7(15-13)6(12)8-9(2,4-10)14-8/h4,6-8,12-13H,3H2,1-2H3	J41+J17+J22	6.477e-05	0.00726114	0.00266354	0.000565163	2.91391e-05
1820	METLOBPROH	184.189	C5CO14O2 + EGLYOX + HO2	CCC12OOC(C)(C=CC1=O)C2O	InChI=1S/C9H12O4/c1-3-9-6(10)4-5-8(2,7(9)11)12-13-9/h4-5,7,11H,3H2,1-2H3	J22	3.98e-06	0.000446184	0.00241284	NaN	2.63965e-05
1821	METLPOXMUC	168.19	C826CO3O2 + HO2 + CO+ EPXMC4DIAL + C2H5CO3 + HO2 + CO	CC1(OC1C=CC(=O)CC)C=O	InChI=1S/C9H12O3/c1-3-7(11)4-5-8-9(2,6-10)12-8/h4-6,8H,3H2,1-2H3	J4.*0.028.*0.5+J4.*0.028.*0.5	0.00024976	0.0279997	0.00217244	0.000551971	2.37665e-05
1822	METLQOOH	200.189	METLQO + OH	CCC1=CC(=O)C(O)C(C)(OO)C1=O	InChI=1S/C9H12O5/c1-3-5-4-6(10)8(12)9(2,14-13)7(5)11/h4,8,12-13H,3H2,1-2H3	J41	5.79e-06	0.000649096	0.00111354	0.000262474	1.21821e-05
1823	METOLOOH	218.204	METOLO + OH	CCC12C=CC(O)(OO)C(C)(OO1)C2O	InChI=1S/C9H14O6/c1-3-8-4-5-9(11,13-12)7(2,6(8)10)14-15-8/h4-6,10-12H,3H2,1-2H3	J41	5.79e-06	0.000649096	0.00053754	1.36143e-05	5.88069e-06
1824	MGLYOX	72.0627	CH3CO3 + CO + HO2	O=CC(=O)C	InChI=1S/C3H4O2/c1-3(5)2-4/h2H,1H3	J34	0.000125	0.0140133	0.0138833	0.00104797	0.000151883
1825	MIBK	100.159	CH3CO3 + IC4H9O2	CC(C)CC(=O)C	InChI=1S/C6H12O/c1-5(2)4-6(3)7/h5H,4H2,1-3H3	J22	3.98e-06	0.000446184	0.00278425	0.0004314	3.04597e-05
1826	MIBK3CO	114.142	IPRCO3 + CH3CO3	CC(C)C(=O)C(=O)C	InChI=1S/C6H10O2/c1-4(2)6(8)5(3)7/h4H,1-3H3	J35	0.000268	0.0300445	0.0286089	0.00762411	0.000312982
1827	MIBK3COOOH	146.141	MIBK3COO + OH+ MIBK3COO + OH	OOC(C)(C)C(=O)C(=O)C	InChI=1S/C6H10O4/c1-4(7)5(8)6(2,3)10-9/h9H,1-3H3	J41+J34	0.00013079	0.0146624	0.0291672	0.00762412	0.000319089
1828	MIBKANO3	161.156	MIBKAO + NO2+ MIBKAO + NO2	CC(=O)CC(C)(C)ON(=O)=O	InChI=1S/C6H11NO4/c1-5(8)4-6(2,3)11-7(9)10/h4H2,1-3H3	J55+J22	1.231e-05	0.00138003	0.00465	0.000743034	5.0871e-05
1829	MIBKAOH	116.158	TBUTOLO2 + CH3CO3	CC(=O)CC(C)(C)O	InChI=1S/C6H12O2/c1-5(7)4-6(2,3)8/h8H,4H2,1-3H3	J22	3.98e-06	0.000446184	0.000433	0.0004314	4.73702e-06
1830	MIBKAOH3CO	130.142	IPRHOCO3 + CH3CO3	CC(=O)C(=O)C(C)(C)O	InChI=1S/C6H10O3/c1-4(7)5(8)6(2,3)9/h9H,1-3H3	J35	0.000268	0.0300445	0.0286089	0.00762411	0.000312982
1831	MIBKAOOH	132.158	MIBKAO + OH+ MIBKAO + OH	OOC(C)(C)CC(=O)C	InChI=1S/C6H12O3/c1-5(7)4-6(2,3)9-8/h8H,4H2,1-3H3	J41+J22	9.77e-06	0.00109528	0.000991251	0.000431615	1.08443e-05
1832	MIBKBOH	116.158	IPRCHO + CH3CO3 + HO2	CC(C)C(O)C(=O)C	InChI=1S/C6H12O2/c1-4(2)6(8)5(3)7/h4,6,8H,1-3H3	J22	3.98e-06	0.000446184	0.000433	0.0004314	4.73702e-06
1833	MIBKBOOH	132.158	IPRCHO + CH3CO3 + OH+ MIBKBO + OH	OOC(C(C)C)C(=O)C	InChI=1S/C6H12O3/c1-4(2)6(9-8)5(3)7/h4,6,8H,1-3H3	J22+J41	9.77e-06	0.00109528	0.000991251	0.000431615	1.08443e-05
1834	MIBKHO14	132.158	TBUTOLO2 + HOCH2CO3	OCC(=O)CC(C)(C)O	InChI=1S/C6H12O3/c1-6(2,9)3-5(8)4-7/h7,9H,3-4H2,1-2H3	J22	3.98e-06	0.000446184	0.000433	0.0004314	4.73702e-06
1835	MIBKHO4CHO	130.142	H2M2C3CO3 + HO2 + CO	O=CC(=O)CC(C)(C)O	InChI=1S/C6H10O3/c1-6(2,9)3-5(8)4-7/h4,9H,3H2,1-2H3	J34	0.000125	0.0140133	0.002643	0.000431438	2.89144e-05
1836	MIBKHO4OOH	148.157	MIBKHO4O + OH+ TBUTOLO2 + HCHO + CO + OH	OOCC(=O)CC(C)(C)O	InChI=1S/C6H12O4/c1-6(2,8)3-5(7)4-10-9/h8-9H,3-4H2,1-2H3	J41+J22	9.77e-06	0.00109528	0.00097054	0.000431615	1.06177e-05
1837	MIBKOH34	132.158	IBUTALOH + CH3CO3 + HO2	CC(=O)C(O)C(C)(C)O	InChI=1S/C6H12O3/c1-4(7)5(8)6(2,3)9/h5,8-9H,1-3H3	J22	3.98e-06	0.000446184	0.000433	0.0004314	4.73702e-06
1838	MIBKOHAOOH	148.157	IBUTALOH + CH3CO3 + OH+ MIBKAOHAO + OH	OOC(C(=O)C)C(C)(C)O	InChI=1S/C6H12O4/c1-4(7)5(10-9)6(2,3)8/h5,8-9H,1-3H3	J22+J41	9.77e-06	0.00109528	0.00097054	0.000431615	1.06177e-05
1839	MIBKOHBOOH	148.157	MIBKAOHBO + OH+ MIBKAOHBO + OH	OOCC(C)(O)CC(=O)C	InChI=1S/C6H12O4/c1-5(7)3-6(2,8)4-10-9/h8-9H,3-4H2,1-2H3	J41+J22	9.77e-06	0.00109528	0.00097054	0.000431615	1.06177e-05
1840	MIPK	86.1323	CH3CO3 + IC3H7O2	CC(=O)C(C)C	InChI=1S/C5H10O/c1-4(2)5(3)6/h4H,1-3H3	J22	3.98e-06	0.000446184	0.00254525	7.13594e-05	2.7845e-05
1841	MIPKAOOH	118.131	MIPKAO + OH+ MIPKAO + OH	OOC(C)(C)C(=O)C	InChI=1S/C5H10O3/c1-4(6)5(2,3)8-7/h7H,1-3H3	J41+J22	9.77e-06	0.00109528	0.000752251	7.26465e-05	8.22963e-06
1842	MIPKBNO3	147.129	MIPKBO + NO2+ MIPKBO + NO2	O=N(=O)OCC(C)C(=O)C	InChI=1S/C5H9NO4/c1-4(5(2)7)3-10-6(8)9/h4H,3H2,1-2H3	J53+J22	5.77e-06	0.000646854	0.005455	0.00318905	5.96777e-05
1843	MIPKBOH	102.132	CH3CO3 + HYPROPO2	CC(CO)C(=O)C	InChI=1S/C5H10O2/c1-4(3-6)5(2)7/h4,6H,3H2,1-2H3	J22	3.98e-06	0.000446184	0.000194	7.13594e-05	2.12236e-06
1844	MIPKBOOH	118.131	MIPKBO + OH+ MIPKBO + OH	CC(COO)C(=O)C	InChI=1S/C5H10O3/c1-4(3-8-7)5(2)6/h4,7H,3H2,1-2H3	J41+J22	9.77e-06	0.00109528	0.000752251	7.26465e-05	8.22963e-06
1845	MMALNACO2H	193.112	MGLYOX + NO2 + HCOCO2H + HO2	O=CC(C)(ON(=O)=O)C(O)C(=O)O	InChI=1S/C5H7NO7/c1-5(2-7,13-6(11)12)3(8)4(9)10/h2-3,8H,1H3,(H,9,10)	J56.*10	0.000316	0.0354256	0.0176071	0.00572939	0.000192622
[truncated: 482 more rows]

## Sheet: 7 714 Newly Add Species
No.	Species Name	MolWeight	MCM SMILES	InChI	MolecularFormula	nC	nH	nO	nN	nS	nCl	nBr	Degree of Unsaturation	J_estimated_this study	J_std_estimated_this_study	Estimated_Joverhead, s-1 (when jNO2(sza=0) = 0.01094 s-1)	Pruduct 1	Pruduct 2
[truncated: 714 more rows]
