# Supplementary material for: A new parameterization of photolysis rates for oxygenated volatile organic compounds (OVOCs)
Source: Copernicus journal article supplement (doi:10.5194/acp-25-7037-2025), 2025-07-10
Supplement: Supplementary file 1 [file acp-25-7037-2025-supplement.zip]

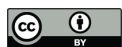

## *Supplement of*

# **A new parameterization of photolysis rates for oxygenated volatile organic compounds (OVOCs)**

**Yuwen Peng et al.**

*Correspondence to:* Bin Yuan (byuan@jnu.edu.cn) and Min Shao (mshao@pku.edu.cn)

- [acp-25-7037-2025-supplement-title-page.pdf](#)
- [OVOCshv\\_SI\\_Table\\_V20250601.xlsx](#)
- [OVOCshv\\_SI\\_V20250601.docx](#)

The copyright of individual parts of the supplement might differ from the article licence.
